# Supplementary material
Source: PubMed Central journal article supplement (PMC3159575)
Supplement: NIHMS146057-supplement-03.pdf [file NIHMS146057-supplement-03.pdf]

## Supplementary Table 2A

A list of 1,403 peptides identified using methanol/PPS combination, sorted by protein name.

MS/MS spectra were searched against the UniProt Human proteomic database; release 09/07.

\* SEQUEST Xcorr observed for an identified peptide; \*\* Human database accession number.

| <i>Protein</i>                                                              | <i>Reference</i> | <i>Peptide sequence</i> | <i>Charge</i> | <i>XCorr*</i> | <i>Accession**</i> |
|-----------------------------------------------------------------------------|------------------|-------------------------|---------------|---------------|--------------------|
| <b><i>40S ribosomal protein S18 - Homo sapiens (Human)</i></b>              |                  |                         |               |               |                    |
|                                                                             | RS18_HUMAN       | R.VITIMQNPR.Q           | 2             | 2.3746        | P62269             |
| <b><i>40S ribosomal protein S2 - Homo sapiens (Human)</i></b>               |                  |                         |               |               |                    |
|                                                                             | RS2_HUMAN        | K.AFVAIGDYNGHVGLGVK.C   | 2             | 2.8167        | P15880             |
|                                                                             | RS2_HUMAN        | K.AFVAIGDYNGHVGLGVK.C   | 2             | 3.7086        | P15880             |
| <b><i>40S ribosomal protein S24 - Homo sapiens (Human)</i></b>              |                  |                         |               |               |                    |
|                                                                             | RS24_HUMAN       | K.TTGFGMIYDSL DYAK.K    | 2             | 2.9052        | P62847             |
|                                                                             | RS24_HUMAN       | K.TTPDVIFVFGFR.T        | 2             | 3.0943        | P62847             |
|                                                                             | RS24_HUMAN       | K.TTGFGMIYDSL DYAK.K    | 2             | 2.796         | P62847             |
|                                                                             | RS24_HUMAN       | K.TTPDVIFVFGFR.T        | 2             | 2.3489        | P62847             |
|                                                                             | RS24_HUMAN       | K.TTGFGMIYDSL DYAK.K    | 2             | 2.6718        | P62847             |
|                                                                             | RS24_HUMAN       | K.TTPDVIFVFGFR.T        | 2             | 2.599         | P62847             |
|                                                                             | RS24_HUMAN       | K.TTGFGMIYDSL DYAK.K    | 2             | 2.9064        | P62847             |
| <b><i>40S ribosomal protein S27-like protein - Homo sapiens (Human)</i></b> |                  |                         |               |               |                    |
|                                                                             | RS27L_HUMAN      | R.LVQSPNSYFMDVK.C       | 2             | 2.4384        | Q71UM5             |
| <b><i>40S ribosomal protein S3 - Homo sapiens (Human)</i></b>               |                  |                         |               |               |                    |
|                                                                             | RS3_HUMAN        | K.GGKPEPPAMPQPVPTA.-    | 2             | 3.2637        | P23396             |
|                                                                             | RS3_HUMAN        | K.GGKPEPPAMPQPVPTA.-    | 2             | 3.1759        | P23396             |
|                                                                             | RS3_HUMAN        | K.GGKPEPPAMPQPVPTA.-    | 2             | 2.9073        | P23396             |
|                                                                             | RS3_HUMAN        | K.GGKPEPPAMPQPVPTA.-    | 2             | 2.5791        | P23396             |
| <b><i>40S ribosomal protein S4, X isoform - Homo sapiens (Human)</i></b>    |                  |                         |               |               |                    |
|                                                                             | RS4X_HUMAN       | R.TDITYPAGFMDVISIDK.T   | 2             | 2.7898        | P62701             |
|                                                                             | RS4X_HUMAN       | R.HPGSFDVVHVK.D         | 3             | 4.2251        | P62701             |
| <b><i>40S ribosomal protein S5 - Homo sapiens (Human)</i></b>               |                  |                         |               |               |                    |
|                                                                             | RS5_HUMAN        | K.TIAEC#LADELINAAK.G    | 3             | 4.0208        | P46782             |
| <b><i>40S ribosomal protein S7 - Homo sapiens (Human)</i></b>               |                  |                         |               |               |                    |
|                                                                             | RS7_HUMAN        | K.AIIIFVPVQLK.S         | 2             | 2.4173        | P62081             |
| <b><i>60S acidic ribosomal protein P0 - Homo sapiens (Human)</i></b>        |                  |                         |               |               |                    |
|                                                                             | RLA0_HUMAN       | R.GHLENNPALEK.L         | 2             | 2.6263        | P05388             |
|                                                                             | RLA0_HUMAN       | R.GHLENNPALEK.L         | 2             | 3.1326        | P05388             |

| <i>Protein</i>                                                      | <i>Reference</i> | <i>Peptide sequence</i>   | <i>Charge</i> | <i>XCorr*</i> | <i>Accession**</i> |
|---------------------------------------------------------------------|------------------|---------------------------|---------------|---------------|--------------------|
|                                                                     | RLA0_HUMAN       | K.IIQLDDYPK.C             | 2             | 2.621         | P05388             |
|                                                                     | RLA0_HUMAN       | R.GHLENNPALEK.L           | 2             | 2.5929        | P05388             |
| <b><i>60S ribosomal protein L10a - Homo sapiens (Human)</i></b>     |                  |                           |               |               |                    |
|                                                                     | RL10A_HUMAN      | K.KYDAFLASESLIK.Q         | 2             | 2.6385        | P62906             |
| <b><i>60S ribosomal protein L10-like - Homo sapiens (Human)</i></b> |                  |                           |               |               |                    |
|                                                                     | RL10L_HUMAN      | R.VHIGQVIMSIR.T           | 2             | 2.4459        | Q96L21             |
| <b><i>60S ribosomal protein L11 - Homo sapiens (Human)</i></b>      |                  |                           |               |               |                    |
|                                                                     | RL11_HUMAN       | K.VLEQLTGQTPVFSK.A        | 2             | 3.6064        | P62913             |
| <b><i>60S ribosomal protein L13 - Homo sapiens (Human)</i></b>      |                  |                           |               |               |                    |
|                                                                     | RL13_HUMAN       | K.STESLQANVQR.L           | 2             | 2.652         | P26373             |
|                                                                     | RL13_HUMAN       | K.STESLQANVQR.L           | 2             | 2.4198        | P26373             |
| <b><i>60S ribosomal protein L14 - Homo sapiens (Human)</i></b>      |                  |                           |               |               |                    |
|                                                                     | RL14_HUMAN       | R.ALVDGPC#TQVR.R          | 2             | 2.581         | P50914             |
|                                                                     | RL14_HUMAN       | K.C#MQLTDFILK.F           | 2             | 2.4894        | P50914             |
|                                                                     | RL14_HUMAN       | R.ALVDGPC#TQVR.R          | 2             | 2.636         | P50914             |
|                                                                     | RL14_HUMAN       | R.ALVDGPC#TQVR.R          | 2             | 3.0109        | P50914             |
|                                                                     | RL14_HUMAN       | R.ALVDGPC#TQVR.R          | 2             | 2.798         | P50914             |
|                                                                     | RL14_HUMAN       | K.C#MQLTDFILK.F           | 2             | 2.6589        | P50914             |
|                                                                     | RL14_HUMAN       | R.ALVDGPC#TQVR.R          | 2             | 2.4865        | P50914             |
|                                                                     | RL14_HUMAN       | K.LVAIVDVIDQNR.A          | 2             | 3.4674        | P50914             |
| <b><i>60S ribosomal protein L18 - Homo sapiens (Human)</i></b>      |                  |                           |               |               |                    |
|                                                                     | RL18_HUMAN       | K.ILTFDQLALDSPK.G         | 2             | 3.9814        | Q07020             |
|                                                                     | RL18_HUMAN       | K.ILTFDQLALDSPK.G         | 2             | 3.5481        | Q07020             |
|                                                                     | RL18_HUMAN       | K.GC#GTVLLSGPR.K          | 2             | 2.4692        | Q07020             |
|                                                                     | RL18_HUMAN       | K.ILTFDQLALDSPK.G         | 2             | 3.367         | Q07020             |
|                                                                     | RL18_HUMAN       | K.ILTFDQLALDSPK.G         | 2             | 2.8506        | Q07020             |
| <b><i>60S ribosomal protein L18a - Homo sapiens (Human)</i></b>     |                  |                           |               |               |                    |
|                                                                     | RL18A_HUMAN      | R.DLTTAGAVTQC#YR.D        | 2             | 2.824         | Q02543             |
|                                                                     | RL18A_HUMAN      | K.SSGEIVYC#GQVFEK.S       | 2             | 3.2284        | Q02543             |
|                                                                     | RL18A_HUMAN      | R.DLTTAGAVTQC#YR.D        | 2             | 2.7283        | Q02543             |
|                                                                     | RL18A_HUMAN      | K.SSGEIVYC#GQVFEK.S       | 2             | 2.9374        | Q02543             |
| <b><i>60S ribosomal protein L23 - Homo sapiens (Human)</i></b>      |                  |                           |               |               |                    |
|                                                                     | RL23_HUMAN       | R.ISLGLPVGAVINC#ADNTGAK.N | 2             | 2.4817        | P62829             |
| <b><i>60S ribosomal protein L24 - Homo sapiens (Human)</i></b>      |                  |                           |               |               |                    |

| <i>Protein</i>                                                   | <i>Reference</i> | <i>Peptide sequence</i> | <i>Charge</i> | <i>XCorr*</i> | <i>Accession**</i> |
|------------------------------------------------------------------|------------------|-------------------------|---------------|---------------|--------------------|
|                                                                  | RL24_HUMAN       | K.VFQFLNAKC#ESAFLSKR.N  | 2             | 2.4107        | P83731             |
|                                                                  | RL24_HUMAN       | K.VFQFLNAKC#ESAFLSKR.N  | 2             | 2.3442        | P83731             |
| <b><i>60S ribosomal protein L6 - Homo sapiens (Human)</i></b>    |                  |                         |               |               |                    |
|                                                                  | RL6_HUMAN        | K.HLTDAYFK.K            | 2             | 2.4537        | Q02878             |
|                                                                  | RL6_HUMAN        | R.ASITPGTILIILTGR.H     | 2             | 3.2609        | Q02878             |
|                                                                  | RL6_HUMAN        | R.ASITPGTILIILTGR.H     | 2             | 2.7782        | Q02878             |
|                                                                  | RL6_HUMAN        | R.ASITPGTILIILTGR.H     | 2             | 3.0492        | Q02878             |
| <b><i>60S ribosomal protein L7 - Homo sapiens (Human)</i></b>    |                  |                         |               |               |                    |
|                                                                  | RL7_HUMAN        | R.IALTDNALIAR.S         | 2             | 2.9696        | P18124             |
|                                                                  | RL7_HUMAN        | R.IVEPYIAWGYPNLK.S      | 2             | 2.9473        | P18124             |
|                                                                  | RL7_HUMAN        | R.IVEPYIAWGYPNLK.S      | 2             | 2.8266        | P18124             |
|                                                                  | RL7_HUMAN        | R.IVEPYIAWGYPNLK.S      | 2             | 2.7256        | P18124             |
|                                                                  | RL7_HUMAN        | R.IALTDNALIAR.S         | 2             | 2.6854        | P18124             |
|                                                                  | RL7_HUMAN        | R.IVEPYIAWGYPNLK.S      | 2             | 2.5953        | P18124             |
| <b><i>60S ribosomal protein L7a - Homo sapiens (Human)</i></b>   |                  |                         |               |               |                    |
|                                                                  | RL7A_HUMAN       | K.VPPAINQFTQALDR.Q      | 2             | 2.4564        | P62424             |
|                                                                  | RL7A_HUMAN       | K.VPPAINQFTQALDR.Q      | 2             | 2.9275        | P62424             |
|                                                                  | RL7A_HUMAN       | K.VPPAINQFTQALDR.Q      | 2             | 3.113         | P62424             |
|                                                                  | RL7A_HUMAN       | R.KTCTTVAFQVNSQEDK.G    | 2             | 2.3604        | P62424             |
| <b><i>60S ribosomal protein L9 - Homo sapiens (Human)</i></b>    |                  |                         |               |               |                    |
|                                                                  | RL9_HUMAN        | R.TIC#SHVQNMIIK.G       | 2             | 2.6089        | P32969             |
|                                                                  | RL9_HUMAN        | R.TIC#SHVQNMIIK.G       | 2             | 2.8809        | P32969             |
| <b><i>Actin, aortic smooth muscle - Homo sapiens (Human)</i></b> |                  |                         |               |               |                    |
|                                                                  | ACTA_HUMAN       | K.DSYVGDEAQS.K          | 2             | 2.6591        | P62736             |
|                                                                  | ACTA_HUMAN       | K.AGFAGDDAPR.A          | 2             | 2.7112        | P62736             |
|                                                                  | ACTA_HUMAN       | R.HQGVVMVGMGQK.D        | 2             | 2.4777        | P62736             |
|                                                                  | ACTA_HUMAN       | R.LDLAGRDLTDYLMK.I      | 2             | 2.4095        | P62736             |
|                                                                  | ACTA_HUMAN       | R.LDLAGRDLTDYLMKILTER.G | 3             | 3.7781        | P62736             |
|                                                                  | ACTA_HUMAN       | R.LDLAGRDLTDYLMKILTER.G | 3             | 4.287         | P62736             |
|                                                                  | ACTA_HUMAN       | K.DSYVGDEAQS.K          | 2             | 2.4821        | P62736             |
|                                                                  | ACTA_HUMAN       | K.AGFAGDDAPR.A          | 2             | 2.5252        | P62736             |
|                                                                  | ACTA_HUMAN       | R.LDLAGRDLTDYLMK.I      | 2             | 3.3284        | P62736             |
|                                                                  | ACTA_HUMAN       | R.LDLAGRDLTDYLMKILTER.G | 3             | 4.4045        | P62736             |
|                                                                  | ACTA_HUMAN       | K.DSYVGDEAQS.K          | 2             | 2.523         | P62736             |
|                                                                  | ACTA_HUMAN       | K.AGFAGDDAPR.A          | 2             | 2.4662        | P62736             |

| <i>Protein</i>                                                                    | <i>Reference</i> | <i>Peptide sequence</i>            | <i>Charge</i> | <i>XCorr*</i> | <i>Accession**</i> |
|-----------------------------------------------------------------------------------|------------------|------------------------------------|---------------|---------------|--------------------|
| ACTA_HUMAN                                                                        |                  | R.HQGVMVGMGQK.D                    | 2             | 2.8007        | P62736             |
| ACTA_HUMAN                                                                        |                  | K.EITALAPSTM*K.I                   | 2             | 2.4897        | P62736             |
| ACTA_HUMAN                                                                        |                  | R.LDLAGRDLTDYLM*K.I                | 2             | 2.4253        | P62736             |
| ACTA_HUMAN                                                                        |                  | R.LDLAGRDLTDYLMK.I                 | 2             | 2.5905        | P62736             |
| ACTA_HUMAN                                                                        |                  | K.DSYVGDEAQSQR.G                   | 2             | 2.3643        | P62736             |
| ACTA_HUMAN                                                                        |                  | K.AGFAGDDAPR.A                     | 2             | 2.6045        | P62736             |
| ACTA_HUMAN                                                                        |                  | K.EITALAPSTM*K.I                   | 2             | 2.4469        | P62736             |
| ACTA_HUMAN                                                                        |                  | K.EITALAPSTMK.I                    | 2             | 2.428         | P62736             |
| ACTA_HUMAN                                                                        |                  | R.LDLAGRDLTDYLMK.I                 | 2             | 2.6957        | P62736             |
| <b><i>Actin, cytoplasmic 1 - Homo sapiens (Human)</i></b>                         |                  |                                    |               |               |                    |
| ACTB_HUMAN                                                                        |                  | R.GYSFTTTAER.E                     | 2             | 2.6212        | P60709             |
| ACTB_HUMAN                                                                        |                  | R.GYSFTTTAER.E                     | 2             | 2.3589        | P60709             |
| ACTB_HUMAN                                                                        |                  | K.DLYANTVLSGGTTMYPGIADR.M          | 2             | 3.04          | P60709             |
| ACTB_HUMAN                                                                        |                  | R.GYSFTTTAER.E                     | 2             | 2.4565        | P60709             |
| ACTB_HUMAN                                                                        |                  | K.DLYANTVLSGGTTMYPGIADR.M          | 2             | 3.5705        | P60709             |
| ACTB_HUMAN                                                                        |                  | K.DLYANTVLSGGTTMYPGIADR.M          | 2             | 4.3093        | P60709             |
| ACTB_HUMAN                                                                        |                  | K.DLYANTVLSGGTTMYPGIADR.M          | 2             | 3.5558        | P60709             |
| ACTB_HUMAN                                                                        |                  | R.TTGIVMDSGDGVTHTVPIYEGYALPHAILR.L | 3             | 5.522         | P60709             |
| ACTB_HUMAN                                                                        |                  | R.C#PEALFQPSFLGMESC#GIHETTFNSIMK.C | 3             | 4.2996        | P60709             |
| ACTB_HUMAN                                                                        |                  | K.YPIEHGIVTNWDDM*EKIWHHTFYNELR.V   | 4             | 4.5903        | P60709             |
| ACTB_HUMAN                                                                        |                  | R.GYSFTTTAER.E                     | 2             | 2.9371        | P60709             |
| ACTB_HUMAN                                                                        |                  | K.DLYANTVLSGGTTMYPGIADR.M          | 2             | 4.429         | P60709             |
| <b><i>Adipocyte plasma membrane-associated protein - Homo sapiens (Human)</i></b> |                  |                                    |               |               |                    |
| APMAP_HUMAN                                                                       |                  | R.RPLRPQVVTDGQQAPEAK.D             | 3             | 4.4374        | Q9HDC9             |
| <b><i>ADP/ATP translocase 1 - Homo sapiens (Human)</i></b>                        |                  |                                    |               |               |                    |
| ADT1_HUMAN                                                                        |                  | R.YFPTQALNFAFK.D                   | 2             | 2.804         | P12235             |
| ADT1_HUMAN                                                                        |                  | K.LLLQVQHASK.Q                     | 2             | 2.4117        | P12235             |
| ADT1_HUMAN                                                                        |                  | K.GADIMYGTVDC#WR.K                 | 2             | 2.391         | P12235             |
| ADT1_HUMAN                                                                        |                  | R.YFPTQALNFAFK.D                   | 2             | 2.6301        | P12235             |
| ADT1_HUMAN                                                                        |                  | K.LLLQVQHASK.Q                     | 2             | 2.6144        | P12235             |
| ADT1_HUMAN                                                                        |                  | R.YFPTQALNFAFK.D                   | 2             | 2.3005        | P12235             |
| ADT1_HUMAN                                                                        |                  | R.YFPTQALNFAFK.D                   | 2             | 3.7556        | P12235             |
| ADT1_HUMAN                                                                        |                  | R.YFPTQALNFAFK.D                   | 2             | 3.1878        | P12235             |
| ADT1_HUMAN                                                                        |                  | K.GADIMYGTVDC#WR.K                 | 2             | 2.4745        | P12235             |
| ADT1_HUMAN                                                                        |                  | R.YFPTQALNFAFKDK.Y                 | 2             | 2.4669        | P12235             |

| <i>Protein</i>                                                       | <i>Reference</i> | <i>Peptide sequence</i> | <i>Charge</i> | <i>XCorr*</i> | <i>Accession**</i> |
|----------------------------------------------------------------------|------------------|-------------------------|---------------|---------------|--------------------|
| <b><i>ADP/ATP translocase 2 - Homo sapiens (Human)</i></b>           |                  |                         |               |               |                    |
| ADT2_HUMAN                                                           |                  | R.GMGGAFVLVLYDEIKKYT.-  | 2             | 2.8304        | P05141             |
| ADT2_HUMAN                                                           |                  | K.DFLAGGVAAAISK.T       | 2             | 3.6781        | P05141             |
| ADT2_HUMAN                                                           |                  | K.DFLAGGVAAAISK.T       | 2             | 2.9874        | P05141             |
| ADT2_HUMAN                                                           |                  | K.DFLAGGVAAAISK.T       | 2             | 3.2           | P05141             |
| ADT2_HUMAN                                                           |                  | R.GMGGAFVLVLYDEIKKYT.-  | 2             | 3.2393        | P05141             |
| ADT2_HUMAN                                                           |                  | K.DFLAGGVAAAISK.T       | 2             | 4.5688        | P05141             |
| ADT2_HUMAN                                                           |                  | K.DFLAGGVAAAISK.T       | 1             | 2.178         | P05141             |
| ADT2_HUMAN                                                           |                  | R.GMGGAFVLVLYDEIKKYT.-  | 2             | 3.0375        | P05141             |
| <b><i>ADP/ATP translocase 3 - Homo sapiens (Human)</i></b>           |                  |                         |               |               |                    |
| ADT3_HUMAN                                                           |                  | K.DFLAGGIAAAISK.T       | 2             | 3.8179        | P12236             |
| ADT3_HUMAN                                                           |                  | K.DFLAGGIAAAISK.T       | 2             | 3.7338        | P12236             |
| ADT3_HUMAN                                                           |                  | K.DFLAGGIAAAISK.T       | 2             | 3.5625        | P12236             |
| ADT3_HUMAN                                                           |                  | K.DFLAGGIAAAISK.T       | 2             | 3.2756        | P12236             |
| ADT3_HUMAN                                                           |                  | K.DFLAGGIAAAISK.T       | 2             | 2.7364        | P12236             |
| ADT3_HUMAN                                                           |                  | K.DFLAGGIAAAISK.T       | 1             | 2.5381        | P12236             |
| <b><i>ADP-ribosyl cyclase 2 precursor - Homo sapiens (Human)</i></b> |                  |                         |               |               |                    |
| BST1_HUMAN                                                           |                  | K.GFFADYEIPNLQK.E       | 2             | 3.1148        | Q10588             |
| BST1_HUMAN                                                           |                  | K.GFFADYEIPNLQK.E       | 2             | 2.8019        | Q10588             |
| BST1_HUMAN                                                           |                  | K.GFFADYEIPNLQK.E       | 2             | 2.6575        | Q10588             |
| BST1_HUMAN                                                           |                  | K.GFFADYEIPNLQK.E       | 2             | 2.8897        | Q10588             |
| BST1_HUMAN                                                           |                  | K.GFFADYEIPNLQK.E       | 2             | 2.5833        | Q10588             |
| BST1_HUMAN                                                           |                  | K.GFFADYEIPNLQK.E       | 2             | 2.8181        | Q10588             |
| <b><i>Aldehyde dehydrogenase 3B1 - Homo sapiens (Human)</i></b>      |                  |                         |               |               |                    |
| AL3B1_HUMAN                                                          |                  | K.NLATQLDSAFIR.K        | 2             | 2.4486        | P43353             |
| AL3B1_HUMAN                                                          |                  | R.FYGDDPQSSPNLGR.I      | 2             | 3.4846        | P43353             |
| <b><i>Annexin A1 - Homo sapiens (Human)</i></b>                      |                  |                         |               |               |                    |
| ANXA1_HUMAN                                                          |                  | K.ALTGHLEEVVLLALK.T     | 2             | 3.1095        | P04083             |
| <b><i>Annexin A2 - Homo sapiens (Human)</i></b>                      |                  |                         |               |               |                    |
| ANXA2_HUMAN                                                          |                  | R.TNQELQEINR.V          | 2             | 2.9352        | P07355             |
| ANXA2_HUMAN                                                          |                  | K.TPAQYDASELK.A         | 2             | 3.1626        | P07355             |
| ANXA2_HUMAN                                                          |                  | K.SYSPYDMLESIR.K        | 2             | 2.5416        | P07355             |
| ANXA2_HUMAN                                                          |                  | K.GVDEVTIVNILTNR.S      | 2             | 2.9794        | P07355             |
| ANXA2_HUMAN                                                          |                  | K.SALSGHLETVILGLLK.T    | 3             | 3.9586        | P07355             |
| ANXA2_HUMAN                                                          |                  | R.TNQELQEINR.V          | 2             | 3.0887        | P07355             |

| <i>Protein</i> | <i>Reference</i> | <i>Peptide sequence</i>       | <i>Charge</i> | <i>XCorr*</i> | <i>Accession**</i> |
|----------------|------------------|-------------------------------|---------------|---------------|--------------------|
| ANXA2_HUMAN    |                  | K.TPAQYDASELK.A               | 2             | 3.25          | P07355             |
| ANXA2_HUMAN    |                  | K.SLYYYIQDQTK.G               | 2             | 3.4341        | P07355             |
| ANXA2_HUMAN    |                  | K.AYTNFDAERDALNIETAIK.T       | 2             | 2.3249        | P07355             |
| ANXA2_HUMAN    |                  | K.SYSPYDMLESIRK.E             | 2             | 2.6198        | P07355             |
| ANXA2_HUMAN    |                  | K.GVDEVTIVNILTNR.S            | 2             | 2.577         | P07355             |
| ANXA2_HUMAN    |                  | K.GVDEVTIVNILTNR.S            | 2             | 3.3456        | P07355             |
| ANXA2_HUMAN    |                  | K.SALSGHLETIVILGLLK.T         | 2             | 4.3126        | P07355             |
| ANXA2_HUMAN    |                  | R.DLYDAGVKR.K                 | 2             | 2.4015        | P07355             |
| ANXA2_HUMAN    |                  | R.TNQELQEINR.V                | 2             | 3.1814        | P07355             |
| ANXA2_HUMAN    |                  | K.TPAQYDASELK.A               | 2             | 3.8152        | P07355             |
| ANXA2_HUMAN    |                  | K.LSLEGDHSTPPSAYGSVK.A        | 2             | 3.1983        | P07355             |
| ANXA2_HUMAN    |                  | R.AEDGSVIDYELIDQDAR.D         | 2             | 3.4092        | P07355             |
| ANXA2_HUMAN    |                  | R.AEDGSVIDYELIDQDAR.D         | 2             | 2.4255        | P07355             |
| ANXA2_HUMAN    |                  | K.SYSPYDMLESIR.K              | 2             | 2.3697        | P07355             |
| ANXA2_HUMAN    |                  | K.GVDEVTIVNILTNR.S            | 2             | 2.7963        | P07355             |
| ANXA2_HUMAN    |                  | K.SALSGHLETIVILGLLK.T         | 2             | 2.4054        | P07355             |
| ANXA2_HUMAN    |                  | R.TNQELQEINR.V                | 2             | 3.194         | P07355             |
| ANXA2_HUMAN    |                  | K.TPAQYDASELK.A               | 2             | 3.6265        | P07355             |
| ANXA2_HUMAN    |                  | K.GVDEVTIVNILTNR.S            | 2             | 3.3728        | P07355             |
| ANXA2_HUMAN    |                  | K.GVDEVTIVNILTNR.S            | 2             | 3.0007        | P07355             |
| ANXA2_HUMAN    |                  | K.SALSGHLETIVILGLLK.T         | 2             | 4.4282        | P07355             |
| ANXA2_HUMAN    |                  | K.SLYYYIQDQTKGDYQK.A          | 2             | 3.7215        | P07355             |
| ANXA2_HUMAN    |                  | R.AEDGSVIDYELIDQDAR.D         | 2             | 2.8201        | P07355             |
| ANXA2_HUMAN    |                  | K.GDLENAFLNLVQC#IQNKPLYFADR.L | 2             | 3.3201        | P07355             |

***Apoptosis regulator BAX, membrane isoform alpha - Homo sapiens (Human)***

|            |  |                   |   |        |        |
|------------|--|-------------------|---|--------|--------|
| BAXA_HUMAN |  | R.MIAAVDTDSPR.E   | 2 | 2.5613 | Q07812 |
| BAXA_HUMAN |  | R.MIAAVDTDSPR.E   | 2 | 2.5276 | Q07812 |
| BAXA_HUMAN |  | K.TGALLLQGFQDR.A  | 2 | 3.154  | Q07812 |
| BAXA_HUMAN |  | K.TGALLLQGFQDR.A  | 2 | 3.441  | Q07812 |
| BAXA_HUMAN |  | K.TGALLLQGFQDR.A  | 2 | 3.1732 | Q07812 |
| BAXA_HUMAN |  | R.IGDELDSNMELQR.M | 2 | 3.1251 | Q07812 |

***Atlastin-3 - Homo sapiens (Human)***

|             |  |                         |   |        |        |
|-------------|--|-------------------------|---|--------|--------|
| ATLA3_HUMAN |  | K.SMLQATAEANNLAAAASAK.D | 2 | 3.4138 | Q6DD88 |
| ATLA3_HUMAN |  | R.LAMDEIFQKPFQTLMLVLR.D | 3 | 4.2907 | Q6DD88 |

***ATP synthase a chain - Homo sapiens (Human)***

| <i>Protein</i>                                                                         | <i>Reference</i> | <i>Peptide sequence</i>   | <i>Charge</i> | <i>XCorr*</i> | <i>Accession**</i> |
|----------------------------------------------------------------------------------------|------------------|---------------------------|---------------|---------------|--------------------|
| ATP6_HUMAN                                                                             |                  | R.LITTQQWLIK.L            | 2             | 2.6533        | P00846             |
| ATP6_HUMAN                                                                             |                  | R.LITTQQWLIK.L            | 2             | 2.5048        | P00846             |
| ATP6_HUMAN                                                                             |                  | R.LITTQQWLIK.L            | 2             | 2.6973        | P00846             |
| <b><i>ATP synthase B chain, mitochondrial precursor - Homo sapiens (Human)</i></b>     |                  |                           |               |               |                    |
| AT5F1_HUMAN                                                                            |                  | K.HVVQSISTQQEK.E          | 2             | 2.686         | P24539             |
| AT5F1_HUMAN                                                                            |                  | R.YGLIPEEFFQFLYPK.T       | 2             | 2.6633        | P24539             |
| AT5F1_HUMAN                                                                            |                  | K.SQQALVQK.R              | 2             | 2.3885        | P24539             |
| AT5F1_HUMAN                                                                            |                  | R.YGLIPEEFFQFLYPK.T       | 2             | 2.5564        | P24539             |
| AT5F1_HUMAN                                                                            |                  | R.YGLIPEEFFQFLYPK.T       | 2             | 3.1315        | P24539             |
| AT5F1_HUMAN                                                                            |                  | K.SQQALVQK.R              | 2             | 2.3146        | P24539             |
| AT5F1_HUMAN                                                                            |                  | K.HVVQSISTQQEK.E          | 2             | 2.8591        | P24539             |
| AT5F1_HUMAN                                                                            |                  | K.QASIQHIQNAIDTEK.S       | 2             | 2.6913        | P24539             |
| <b><i>ATP synthase D chain, mitochondrial - Homo sapiens (Human)</i></b>               |                  |                           |               |               |                    |
| ATP5H_HUMAN                                                                            |                  | K.NLIPFDQMTIEDLNEAFPETK.L | 2             | 2.624         | O75947             |
| ATP5H_HUMAN                                                                            |                  | K.YPYWPHQPIENL.-          | 2             | 3.1325        | O75947             |
| <b><i>ATP synthase e chain, mitochondrial - Homo sapiens (Human)</i></b>               |                  |                           |               |               |                    |
| ATP5I_HUMAN                                                                            |                  | R.YSALFLGVAYGATR.Y        | 2             | 3.5039        | P56385             |
| ATP5I_HUMAN                                                                            |                  | R.YSALFLGVAYGATR.Y        | 2             | 2.6429        | P56385             |
| ATP5I_HUMAN                                                                            |                  | R.YSALFLGVAYGATR.Y        | 2             | 2.9455        | P56385             |
| ATP5I_HUMAN                                                                            |                  | R.YSALFLGVAYGATR.Y        | 2             | 3.1184        | P56385             |
| ATP5I_HUMAN                                                                            |                  | R.YSALFLGVAYGATR.Y        | 2             | 2.8861        | P56385             |
| ATP5I_HUMAN                                                                            |                  | R.YSALFLGVAYGATR.Y        | 2             | 3.3263        | P56385             |
| ATP5I_HUMAN                                                                            |                  | R.YSALFLGVAYGATR.Y        | 2             | 3.1449        | P56385             |
| ATP5I_HUMAN                                                                            |                  | R.ELAEDDSILK.-            | 1             | 2.2819        | P56385             |
| <b><i>ATP synthase f chain, mitochondrial - Homo sapiens (Human)</i></b>               |                  |                           |               |               |                    |
| ATPK_HUMAN                                                                             |                  | K.LGELPSWILM*R.D          | 2             | 2.3061        | P56134             |
| ATPK_HUMAN                                                                             |                  | K.LGELPSWILM*R.D          | 2             | 2.8183        | P56134             |
| ATPK_HUMAN                                                                             |                  | R.DFSPSGIFGAFQR.G         | 2             | 2.4436        | P56134             |
| ATPK_HUMAN                                                                             |                  | K.LGELPSWILMR.D           | 2             | 3.2747        | P56134             |
| ATPK_HUMAN                                                                             |                  | K.LGELPSWILMR.D           | 2             | 2.7755        | P56134             |
| ATPK_HUMAN                                                                             |                  | R.DFSPSGIFGAFQR.G         | 2             | 2.5802        | P56134             |
| ATPK_HUMAN                                                                             |                  | K.LGELPSWILM*R.D          | 2             | 2.3272        | P56134             |
| ATPK_HUMAN                                                                             |                  | R.DFSPSGIFGAFQR.G         | 2             | 2.4921        | P56134             |
| <b><i>ATP synthase gamma chain, mitochondrial precursor - Homo sapiens (Human)</i></b> |                  |                           |               |               |                    |
| ATPG_HUMAN                                                                             |                  | K.HLLIGVSSDR.G            | 2             | 2.3432        | P36542             |

| <i>Protein</i>                                                                           | <i>Reference</i> | <i>Peptide sequence</i>         | <i>Charge</i> | <i>XCorr*</i> | <i>Accession**</i> |
|------------------------------------------------------------------------------------------|------------------|---------------------------------|---------------|---------------|--------------------|
|                                                                                          | ATPG_HUMAN       | K.HLLIGVSSDR.G                  | 2             | 2.5936        | P36542             |
|                                                                                          | ATPG_HUMAN       | K.HLLIGVSSDR.G                  | 2             | 2.468         | P36542             |
| <b><i>ATP synthase subunit alpha, mitochondrial precursor - Homo sapiens (Human)</i></b> |                  |                                 |               |               |                    |
|                                                                                          | ATPA_HUMAN       | K.HALIIYDDLK.Q                  | 2             | 2.511         | P25705             |
|                                                                                          | ATPA_HUMAN       | K.HALIIYDDLK.Q                  | 2             | 3.0634        | P25705             |
| <b><i>ATP synthase subunit beta, mitochondrial precursor - Homo sapiens (Human)</i></b>  |                  |                                 |               |               |                    |
|                                                                                          | ATPB_HUMAN       | K.TVLIMELINNVAK.A               | 2             | 2.7392        | P06576             |
|                                                                                          | ATPB_HUMAN       | R.LVLEVAQHLGESTVR.T             | 2             | 2.541         | P06576             |
| <b><i>ATP synthase subunit g, mitochondrial - Homo sapiens (Human)</i></b>               |                  |                                 |               |               |                    |
|                                                                                          | ATP5L_HUMAN      | K.IVNSAQTGSFK.Q                 | 2             | 2.5007        | O75964             |
| <b><i>ATWD578 - Homo sapiens (Human)</i></b>                                             |                  |                                 |               |               |                    |
|                                                                                          | Q6UW11_HUMAN     | R.AAAPDVAPAPGPAPR.A             | 2             | 2.7871        | Q6UW11             |
|                                                                                          | Q6UW11_HUMAN     | R.AAAPDVAPAPGPAPR.A             | 2             | 2.4093        | Q6UW11             |
|                                                                                          | Q6UW11_HUMAN     | R.AAAPDVAPAPGPAPR.A             | 2             | 2.8106        | Q6UW11             |
|                                                                                          | Q6UW11_HUMAN     | R.IINGIIISVK.T                  | 2             | 2.536         | Q6UW11             |
|                                                                                          | Q6UW11_HUMAN     | R.AAAPDVAPAPGPAPR.A             | 2             | 3.1134        | Q6UW11             |
|                                                                                          | Q6UW11_HUMAN     | K.QMNVQLAAK.I                   | 2             | 2.4142        | Q6UW11             |
| <b><i>B-cell receptor-associated protein 31 - Homo sapiens (Human)</i></b>               |                  |                                 |               |               |                    |
|                                                                                          | BAP31_HUMAN      | K.AENQVLAMR.K                   | 2             | 2.6534        | P51572             |
|                                                                                          | BAP31_HUMAN      | K.AENQVLAMR.K                   | 2             | 2.4014        | P51572             |
|                                                                                          | BAP31_HUMAN      | K.YMEENDQLKK.G                  | 2             | 2.3373        | P51572             |
|                                                                                          | BAP31_HUMAN      | K.AENQVLAM*R.K                  | 2             | 2.4955        | P51572             |
|                                                                                          | BAP31_HUMAN      | K.AENQVLAMR.K                   | 2             | 2.4808        | P51572             |
|                                                                                          | BAP31_HUMAN      | K.LDVGNAEVKLEENR.S              | 2             | 3.2891        | P51572             |
| <b><i>BH3-interacting domain death agonist - Homo sapiens (Human)</i></b>                |                  |                                 |               |               |                    |
|                                                                                          | BID_HUMAN        | R.HLAQVGDSDMR.S                 | 2             | 2.7367        | P55957             |
|                                                                                          | BID_HUMAN        | R.HLAQVGDSDMR.S                 | 2             | 2.3472        | P55957             |
|                                                                                          | BID_HUMAN        | R.DVFHTTVNFINQNL.R.T            | 2             | 2.3792        | P55957             |
|                                                                                          | BID_HUMAN        | R.HLAQVGDSDMR.S                 | 2             | 2.5405        | P55957             |
|                                                                                          | BID_HUMAN        | R.DVFHTTVNFINQNL.R.T            | 2             | 2.8099        | P55957             |
| <b><i>Brain acid soluble protein 1 - Homo sapiens (Human)</i></b>                        |                  |                                 |               |               |                    |
|                                                                                          | BASP_HUMAN       | K.AQGPAASAEEPKEPAANSQDQTVTVKE.- | 3             | 4.4936        | P80723             |
| <b><i>BTB/POZ domain-containing protein KCTD12 - Homo sapiens (Human)</i></b>            |                  |                                 |               |               |                    |
|                                                                                          | KCD12_HUMAN      | R.MFTQQQPQELAR.D                | 2             | 3.1906        | Q96CX2             |



| <i>Protein</i>                                                                         | <i>Reference</i> | <i>Peptide sequence</i> | <i>Charge</i> | <i>XCorr*</i> | <i>Accession**</i> |
|----------------------------------------------------------------------------------------|------------------|-------------------------|---------------|---------------|--------------------|
|                                                                                        | KCD12_HUMAN      | R.MFTQQQPQELAR.D        | 2             | 3.4497        | Q96CX2             |
| <b><i>C1orf121 protein - Homo sapiens (Human)</i></b>                                  |                  |                         |               |               |                    |
|                                                                                        | Q8WUE8_HUMAN     | R.C#FRPGC#RGPGCTLSAR.L  | 2             | 2.4735        | Q8WUE8             |
| <b><i>Calnexin precursor - Homo sapiens (Human)</i></b>                                |                  |                         |               |               |                    |
|                                                                                        | CALX_HUMAN       | K.DKGDEEEEGEEKLEEK.Q    | 3             | 4.2063        | P27824             |
|                                                                                        | CALX_HUMAN       | K.AEEDEILNR.S           | 2             | 2.7832        | P27824             |
|                                                                                        | CALX_HUMAN       | K.AEEDEILNR.S           | 2             | 2.4471        | P27824             |
|                                                                                        | CALX_HUMAN       | K.IPNPDFFEDLEPFR.M      | 2             | 3.6478        | P27824             |
|                                                                                        | CALX_HUMAN       | K.IPNPDFFEDLEPFR.M      | 2             | 2.913         | P27824             |
|                                                                                        | CALX_HUMAN       | K.AEEDEILNR.S           | 2             | 2.6295        | P27824             |
|                                                                                        | CALX_HUMAN       | K.APVPTGEVYFADSFDR.G    | 2             | 2.7463        | P27824             |
|                                                                                        | CALX_HUMAN       | K.IPNPDFFEDLEPFR.M      | 2             | 2.9321        | P27824             |
|                                                                                        | CALX_HUMAN       | K.AEEDEILNR.S           | 2             | 2.5692        | P27824             |
|                                                                                        | CALX_HUMAN       | K.IPNPDFFEDLEPFR.M      | 2             | 3.5594        | P27824             |
|                                                                                        | CALX_HUMAN       | K.AEEDEILNR.S           | 2             | 2.8388        | P27824             |
|                                                                                        | CALX_HUMAN       | R.IVDDWANDGWGLK.K       | 2             | 3.3322        | P27824             |
|                                                                                        | CALX_HUMAN       | K.APVPTGEVYFADSFDR.G    | 2             | 2.9671        | P27824             |
|                                                                                        | CALX_HUMAN       | K.APVPTGEVYFADSFDR.G    | 2             | 2.8812        | P27824             |
|                                                                                        | CALX_HUMAN       | R.IVDDWANDGWGLK.K       | 2             | 3.5818        | P27824             |
|                                                                                        | CALX_HUMAN       | R.IVDDWANDGWGLK.K       | 2             | 3.0348        | P27824             |
|                                                                                        | CALX_HUMAN       | R.IVDDWANDGWGLK.K       | 2             | 2.3239        | P27824             |
|                                                                                        | CALX_HUMAN       | K.IPNPDFFEDLEPFR.M      | 2             | 3.4322        | P27824             |
|                                                                                        | CALX_HUMAN       | K.IPDPEAVKPDWDEDAPAK.I  | 2             | 3.0715        | P27824             |
|                                                                                        | CALX_HUMAN       | K.IPDPEAVKPDWDEDAPAK.I  | 2             | 3.0033        | P27824             |
| <b><i>Carnitine O-palmitoyltransferase I, liver isoform - Homo sapiens (Human)</i></b> |                  |                         |               |               |                    |
|                                                                                        | CPT1A_HUMAN      | R.ILDNTSEPQPGEAR.L      | 2             | 3.4956        | P50416             |
|                                                                                        | CPT1A_HUMAN      | R.ILDNTSEPQPGEAR.L      | 2             | 3.9612        | P50416             |
| <b><i>Cathepsin G precursor - Homo sapiens (Human)</i></b>                             |                  |                         |               |               |                    |
|                                                                                        | CATG_HUMAN       | R.TIQNDIMLLQLSR.R       | 2             | 3.2873        | P08311             |
|                                                                                        | CATG_HUMAN       | R.PYMAYLQIQSPAGQSR.C    | 2             | 4.8768        | P08311             |
|                                                                                        | CATG_HUMAN       | R.TIQNDIM*LLQLSR.R      | 2             | 2.6596        | P08311             |
|                                                                                        | CATG_HUMAN       | R.TIQNDIMLLQLSR.R       | 2             | 2.93          | P08311             |
|                                                                                        | CATG_HUMAN       | R.TIQNDIMLLQLSR.R       | 2             | 3.175         | P08311             |
|                                                                                        | CATG_HUMAN       | R.TIQNDIMLLQLSR.R       | 2             | 4.3398        | P08311             |
|                                                                                        | CATG_HUMAN       | R.PYMAYLQIQSPAGQSR.C    | 2             | 4.2502        | P08311             |

| <i>Protein</i>                                                                                  | <i>Reference</i> | <i>Peptide sequence</i> | <i>Charge</i> | <i>XCorr*</i> | <i>Accession**</i> |
|-------------------------------------------------------------------------------------------------|------------------|-------------------------|---------------|---------------|--------------------|
|                                                                                                 | CATG_HUMAN       | R.TIQNDIM*LLQLSR.R      | 2             | 2.6286        | P08311             |
|                                                                                                 | CATG_HUMAN       | R.TIQNDIM*LLQLSR.R      | 2             | 2.5648        | P08311             |
|                                                                                                 | CATG_HUMAN       | R.TIQNDIMLLQLSR.R       | 2             | 3.1208        | P08311             |
|                                                                                                 | CATG_HUMAN       | R.PYMAYLQIQSPAGQSR.C    | 2             | 3.3312        | P08311             |
|                                                                                                 | CATG_HUMAN       | R.TIQNDIM*LLQLSR.R      | 2             | 3.4374        | P08311             |
|                                                                                                 | CATG_HUMAN       | R.TIQNDIMLLQLSR.R       | 2             | 3.9129        | P08311             |
|                                                                                                 | CATG_HUMAN       | R.TIQNDIMLLQLSR.R       | 2             | 3.2747        | P08311             |
| <b><i>Cation-dependent mannose-6-phosphate receptor precursor - Homo sapiens (Human)</i></b>    |                  |                         |               |               |                    |
|                                                                                                 | MPRD_HUMAN       | R.HTLADNFNPVSEER.G      | 2             | 3.7658        | P20645             |
|                                                                                                 | MPRD_HUMAN       | R.HTLADNFNPVSEER.G      | 2             | 3.1211        | P20645             |
| <b><i>CD44 antigen precursor - Homo sapiens (Human)</i></b>                                     |                  |                         |               |               |                    |
|                                                                                                 | CD44_HUMAN       | K.ALSIGFETC#R.Y         | 2             | 2.3237        | P16070             |
| <b><i>CD48 antigen precursor - Homo sapiens (Human)</i></b>                                     |                  |                         |               |               |                    |
|                                                                                                 | CD48_HUMAN       | R.C#YTC#QVSNVSSK.N      | 2             | 2.7445        | P09326             |
| <b><i>CD9 antigen - Homo sapiens (Human)</i></b>                                                |                  |                         |               |               |                    |
|                                                                                                 | CD9_HUMAN        | K.EVQEFYKDTYNK.L        | 2             | 2.8692        | P21926             |
| <b><i>CD97 antigen precursor - Homo sapiens (Human)</i></b>                                     |                  |                         |               |               |                    |
|                                                                                                 | CD97_HUMAN       | R.HLIATQLLSNLEDIMR.I    | 2             | 4.3944        | P48960             |
|                                                                                                 | CD97_HUMAN       | R.HLIATQLLSNLEDIMR.I    | 2             | 3.6254        | P48960             |
| <b><i>CDNA FLJ46362 fis, clone TESTI4050293 - Homo sapiens (Human)</i></b>                      |                  |                         |               |               |                    |
|                                                                                                 | Q6ZRH1_HUMAN     | K.MLEAHIKTFRM*R.M       | 2             | 2.3204        | Q6ZRH1             |
| <b><i>CDP-diacylglycerol--inositol 3-phosphatidyltransferase - Homo sapiens (Human)</i></b>     |                  |                         |               |               |                    |
|                                                                                                 | CDIPT_HUMAN      | R.FGAMLDMILTDR.C        | 2             | 2.3921        | O14735             |
|                                                                                                 | CDIPT_HUMAN      | K.SLISVIHLITAAR.N       | 2             | 2.8701        | O14735             |
| <b><i>Cellular tumor antigen p53 - Homo sapiens (Human)</i></b>                                 |                  |                         |               |               |                    |
|                                                                                                 | P53_HUMAN        | K.SVTC#TYSPALNK.M       | 2             | 2.9382        | P04637             |
|                                                                                                 | P53_HUMAN        | K.SVTC#TYSPALNK.M       | 2             | 3.0498        | P04637             |
|                                                                                                 | P53_HUMAN        | R.RTEEENLR.K            | 2             | 2.4847        | P04637             |
|                                                                                                 | P53_HUMAN        | K.SVTC#TYSPALNK.M       | 2             | 3.083         | P04637             |
|                                                                                                 | P53_HUMAN        | K.TC#PVQLWVDSTPPPGTR.V  | 2             | 2.5429        | P04637             |
| <b><i>CKLF-like MARVEL transmembrane domain-containing protein 6 - Homo sapiens (Human)</i></b> |                  |                         |               |               |                    |
|                                                                                                 | CKLF6_HUMAN      | R.SGLAAYFFMGR.L         | 2             | 2.776         | Q9NX76             |
|                                                                                                 | CKLF6_HUMAN      | R.SGLAAYFFMGR.L         | 2             | 3.2259        | Q9NX76             |
|                                                                                                 | CKLF6_HUMAN      | R.SGLAAYFFMGR.L         | 2             | 2.8355        | Q9NX76             |

| <i>Protein</i>                                                            | <i>Reference</i> | <i>Peptide sequence</i>     | <i>Charge</i> | <i>XCorr*</i> | <i>Accession**</i> |
|---------------------------------------------------------------------------|------------------|-----------------------------|---------------|---------------|--------------------|
| <b><i>Clathrin coat assembly protein AP180 - Homo sapiens (Human)</i></b> |                  |                             |               |               |                    |
|                                                                           | AP180_HUMAN      | R.NTLFNLSNFLDK.S            | 2             | 2.6558        | O60641             |
| <b><i>Clathrin heavy chain 1 - Homo sapiens (Human)</i></b>               |                  |                             |               |               |                    |
|                                                                           | CLH1_HUMAN       | R.NNLAGAEELFAR.K            | 2             | 2.7536        | Q00610             |
| <b><i>Coatomer subunit alpha - Homo sapiens (Human)</i></b>               |                  |                             |               |               |                    |
|                                                                           | COPA_HUMAN       | K.LVGQSIIAYLQK.K            | 2             | 3.0906        | P53621             |
|                                                                           | COPA_HUMAN       | K.LVGQSIIAYLQK.K            | 2             | 3.0917        | P53621             |
|                                                                           | COPA_HUMAN       | K.LVGQSIIAYLQK.K            | 2             | 2.5141        | P53621             |
|                                                                           | COPA_HUMAN       | K.LVGQSIIAYLQK.K            | 2             | 2.742         | P53621             |
| <b><i>Coatomer subunit beta - Homo sapiens (Human)</i></b>                |                  |                             |               |               |                    |
|                                                                           | COPB_HUMAN       | K.LPGLLMTIIR.F              | 2             | 2.6946        | P53618             |
|                                                                           | COPB_HUMAN       | K.LPGLLMTIIR.F              | 2             | 3.0215        | P53618             |
| <b><i>Core histone macro-H2A.2 - Homo sapiens (Human)</i></b>             |                  |                             |               |               |                    |
|                                                                           | H2AW_HUMAN       | R.HILLAVANDEELNQLLK.G       | 2             | 2.4584        | Q9P0M6             |
| <b><i>Cytochrome b-245 heavy chain - Homo sapiens (Human)</i></b>         |                  |                             |               |               |                    |
|                                                                           | CY24B_HUMAN      | R.KLLGSALALAR.A             | 2             | 2.5857        | P04839             |
|                                                                           | CY24B_HUMAN      | K.LLGSALALAR.A              | 2             | 2.8734        | P04839             |
|                                                                           | CY24B_HUMAN      | K.MEVGQYIFVK.C              | 2             | 2.5062        | P04839             |
|                                                                           | CY24B_HUMAN      | R.IGVFLC#GPEALAETLSK.Q      | 2             | 3.138         | P04839             |
|                                                                           | CY24B_HUMAN      | R.KLLGSALALAR.A             | 2             | 2.5359        | P04839             |
|                                                                           | CY24B_HUMAN      | K.LLGSALALAR.A              | 2             | 2.8769        | P04839             |
|                                                                           | CY24B_HUMAN      | K.LLGSALALAR.A              | 2             | 3.0439        | P04839             |
|                                                                           | CY24B_HUMAN      | K.MEVGQYIFVK.C              | 2             | 2.5818        | P04839             |
|                                                                           | CY24B_HUMAN      | K.MEVGQYIFVK.C              | 2             | 2.4602        | P04839             |
|                                                                           | CY24B_HUMAN      | R.IVGDWTEGLFNAC#GC#DK.Q     | 2             | 3.0179        | P04839             |
|                                                                           | CY24B_HUMAN      | R.IGVFLC#GPEALAETLSK.Q      | 2             | 2.8402        | P04839             |
|                                                                           | CY24B_HUMAN      | R.KLLGSALALAR.A             | 2             | 3.0123        | P04839             |
|                                                                           | CY24B_HUMAN      | K.LLGSALALAR.A              | 2             | 2.9982        | P04839             |
|                                                                           | CY24B_HUMAN      | K.MEVGQYIFVK.C              | 2             | 2.6795        | P04839             |
|                                                                           | CY24B_HUMAN      | R.IVGDWTEGLFNAC#GC#DK.Q     | 2             | 2.7196        | P04839             |
|                                                                           | CY24B_HUMAN      | R.IGVFLC#GPEALAETLSK.Q      | 2             | 3.2208        | P04839             |
|                                                                           | CY24B_HUMAN      | K.LEWHPFTLTSAPPEEDFFSIHIR.I | 3             | 3.7916        | P04839             |
|                                                                           | CY24B_HUMAN      | K.LLGSALALAR.A              | 2             | 3.2775        | P04839             |
|                                                                           | CY24B_HUMAN      | K.MEVGQYIFVK.C              | 2             | 2.6385        | P04839             |
|                                                                           | CY24B_HUMAN      | K.MEVGQYIFVK.C              | 2             | 2.8065        | P04839             |

| <i>Protein</i>                                                                                             | <i>Reference</i> | <i>Peptide sequence</i>              | <i>Charge</i> | <i>XCorr*</i> | <i>Accession**</i> |
|------------------------------------------------------------------------------------------------------------|------------------|--------------------------------------|---------------|---------------|--------------------|
|                                                                                                            | CY24B_HUMAN      | R.IGVFLC#GPEALAETLSK.Q               | 2             | 2.3923        | P04839             |
|                                                                                                            | CY24B_HUMAN      | R.IGVFLC#GPEALAETLSK.Q               | 2             | 3.8563        | P04839             |
|                                                                                                            | CY24B_HUMAN      | R.IGVFLC#GPEALAETLSK.Q               | 2             | 3.7194        | P04839             |
|                                                                                                            | CY24B_HUMAN      | R.IVGDWTEGLFNAC#GC#DK.Q              | 2             | 2.7578        | P04839             |
| <b><i>Cytochrome b-245 light chain - Homo sapiens (Human)</i></b>                                          |                  |                                      |               |               |                    |
|                                                                                                            | CY24A_HUMAN      | K.HMTAVVK.L                          | 2             | 2.6397        | P13498             |
|                                                                                                            | CY24A_HUMAN      | R.KKPSEEEEEAAAAGGPPGGPQVNPPIVTDEVV.- | 3             | 3.9445        | P13498             |
|                                                                                                            | CY24A_HUMAN      | K.HMTAVVK.L                          | 2             | 2.4776        | P13498             |
|                                                                                                            | CY24A_HUMAN      | R.KKPSEEEEEAAAAGGPPGGPQVNPPIVTDEVV.- | 3             | 4.0812        | P13498             |
|                                                                                                            | CY24A_HUMAN      | R.KKPSEEEEEAAAAGGPPGGPQVNPPIVTDEVV.- | 3             | 4.0268        | P13498             |
|                                                                                                            | CY24A_HUMAN      | R.KKPSEEEEEAAAAGGPPGGPQVNPPIVTDEVV.- | 2             | 4.7791        | P13498             |
| <b><i>Cytochrome c oxidase polypeptide VIc precursor - Homo sapiens (Human)</i></b>                        |                  |                                      |               |               |                    |
|                                                                                                            | COX6C_HUMAN      | K.AGIFQSVK.-                         | 2             | 2.555         | P09669             |
|                                                                                                            | COX6C_HUMAN      | K.AGIFQSVK.-                         | 2             | 2.5486        | P09669             |
|                                                                                                            | COX6C_HUMAN      | K.AGIFQSVK.-                         | 2             | 2.5423        | P09669             |
| <b><i>Cytochrome c oxidase polypeptide VIIa-liver/heart, mitochondrial precursor - Homo sapiens (H</i></b> |                  |                                      |               |               |                    |
|                                                                                                            | CX7A2_HUMAN      | K.LFQEDDEIPLYLK.G                    | 2             | 2.4474        | P14406             |
|                                                                                                            | CX7A2_HUMAN      | K.LFQEDDEIPLYLK.G                    | 2             | 2.4163        | P14406             |
|                                                                                                            | CX7A2_HUMAN      | K.LFQEDDEIPLYLK.G                    | 2             | 2.5025        | P14406             |
| <b><i>Cytochrome c oxidase subunit 2 - Homo sapiens (Human)</i></b>                                        |                  |                                      |               |               |                    |
|                                                                                                            | COX2_HUMAN       | R.ILYMTDEVNDPSLTIK.S                 | 2             | 2.6602        | P00403             |
|                                                                                                            | COX2_HUMAN       | R.LLDVDNRVVLPIEAPIR.M                | 3             | 3.8103        | P00403             |
|                                                                                                            | COX2_HUMAN       | R.LLDVDNRVVLPIEAPIR.M                | 2             | 2.4544        | P00403             |
|                                                                                                            | COX2_HUMAN       | R.MMITSQDVLHSHWAVPTLGLK.T            | 2             | 4.073         | P00403             |
|                                                                                                            | COX2_HUMAN       | R.ILYM*TDEVNDPSLTIK.S                | 2             | 2.4854        | P00403             |
|                                                                                                            | COX2_HUMAN       | R.ILYM*TDEVNDPSLTIK.S                | 2             | 3.558         | P00403             |
|                                                                                                            | COX2_HUMAN       | R.ILYMTDEVNDPSLTIK.S                 | 2             | 3.9082        | P00403             |
|                                                                                                            | COX2_HUMAN       | R.MMITSQDVLHSHWAVPTLGLK.T            | 2             | 2.6969        | P00403             |
| <b><i>Cytochrome c oxidase subunit 4 isoform 1, mitochondrial precursor - Homo sapiens (Human)</i></b>     |                  |                                      |               |               |                    |
|                                                                                                            | COX41_HUMAN      | K.SEDFSLPAYMDR.R                     | 2             | 2.7423        | P13073             |
|                                                                                                            | COX41_HUMAN      | K.SEDFSLPAYMDR.R                     | 2             | 2.4543        | P13073             |
|                                                                                                            | COX41_HUMAN      | R.DHPLPEVAHVK.H                      | 3             | 3.8231        | P13073             |
|                                                                                                            | COX41_HUMAN      | K.SEDFSLPAYMDR.R                     | 2             | 2.7968        | P13073             |
| <b><i>Cytochrome c oxidase subunit 5A, mitochondrial precursor - Homo sapiens (Human)</i></b>              |                  |                                      |               |               |                    |
|                                                                                                            | COX5A_HUMAN      | K.EIYPYVIQELRPTLNELGISTPEELGLDKV.-   | 3             | 4.6806        | P20674             |

| <i>Protein</i>                                                                                | <i>Reference</i> | <i>Peptide sequence</i>    | <i>Charge</i> | <i>XCorr*</i> | <i>Accession**</i> |
|-----------------------------------------------------------------------------------------------|------------------|----------------------------|---------------|---------------|--------------------|
| <b><i>Cytochrome c oxidase subunit 5B, mitochondrial precursor - Homo sapiens (Human)</i></b> |                  |                            |               |               |                    |
|                                                                                               | COX5B_HUMAN      | K.KGLDPYNVLAPK.G           | 2             | 2.5215        | P10606             |
| <b><i>Cytoplasmic FMRI-interacting protein 1 - Homo sapiens (Human)</i></b>                   |                  |                            |               |               |                    |
|                                                                                               | CYFP1_HUMAN      | K.SLLQGTLQYVK.T            | 2             | 2.3823        | Q7L576             |
| <b><i>Cytoskeleton-associated protein 4 - Homo sapiens (Human)</i></b>                        |                  |                            |               |               |                    |
|                                                                                               | CKAP4_HUMAN      | K.IETNENNLESAK.G           | 2             | 3.116         | Q07065             |
|                                                                                               | CKAP4_HUMAN      | R.RLEEELR.Q                | 2             | 2.3737        | Q07065             |
|                                                                                               | CKAP4_HUMAN      | K.SSSSSASAAAAAASSSASC#SR.R | 2             | 2.4566        | Q07065             |
|                                                                                               | CKAP4_HUMAN      | R.STLQTMESDIYEV.R          | 2             | 3.0013        | Q07065             |
|                                                                                               | CKAP4_HUMAN      | R.RLEEELR.Q                | 2             | 2.3995        | Q07065             |
|                                                                                               | CKAP4_HUMAN      | R.STLQTMESDIYEV.R          | 2             | 3.1423        | Q07065             |
|                                                                                               | CKAP4_HUMAN      | R.RLEEELR.Q                | 2             | 2.6395        | Q07065             |
|                                                                                               | CKAP4_HUMAN      | K.IETNENNLESAK.G           | 2             | 2.6181        | Q07065             |
|                                                                                               | CKAP4_HUMAN      | K.VQEQVHTLLSQDQAQAAR.L     | 3             | 4.7923        | Q07065             |
|                                                                                               | CKAP4_HUMAN      | K.VQEQVHTLLSQDQAQAAR.L     | 3             | 5.7991        | Q07065             |
|                                                                                               | CKAP4_HUMAN      | R.DFTSLENTVEER.L           | 2             | 3.4853        | Q07065             |
|                                                                                               | CKAP4_HUMAN      | R.QTESLESLLSK.S            | 2             | 2.3543        | Q07065             |
|                                                                                               | CKAP4_HUMAN      | R.LEGLGSSEADQDGLASTVR.S    | 2             | 3.8805        | Q07065             |
|                                                                                               | CKAP4_HUMAN      | R.LEGLGSSEADQDGLASTVR.S    | 2             | 4.9141        | Q07065             |
|                                                                                               | CKAP4_HUMAN      | R.ERDFTSLENTVEER.L         | 2             | 2.7099        | Q07065             |
|                                                                                               | CKAP4_HUMAN      | K.SSSSSASAAAAAASSSASC#SR.R | 2             | 3.6758        | Q07065             |
|                                                                                               | CKAP4_HUMAN      | K.VQEQVHTLLSQDQAQAAR.L     | 2             | 3.8214        | Q07065             |
|                                                                                               | CKAP4_HUMAN      | R.LEGLGSSEADQDGLASTVR.S    | 2             | 3.1186        | Q07065             |
|                                                                                               | CKAP4_HUMAN      | R.LEGLGSSEADQDGLASTVR.S    | 2             | 4.1936        | Q07065             |
| <b><i>DC2 - Homo sapiens (Human)</i></b>                                                      |                  |                            |               |               |                    |
|                                                                                               | Q9NRP0_HUMAN     | R.VPFLVLEC#PNLK.L          | 2             | 3.5117        | Q9NRP0             |
|                                                                                               | Q9NRP0_HUMAN     | R.VPFLVLEC#PNLK.L          | 2             | 3.1145        | Q9NRP0             |
|                                                                                               | Q9NRP0_HUMAN     | R.VPFLVLEC#PNLK.L          | 2             | 3.3595        | Q9NRP0             |
|                                                                                               | Q9NRP0_HUMAN     | R.VPFLVLEC#PNLK.L          | 2             | 2.8493        | Q9NRP0             |
| <b><i>Dehydrogenase/reductase SDR family member 8 precursor - Homo sapiens (Human)</i></b>    |                  |                            |               |               |                    |
|                                                                                               | DHRS8_HUMAN      | K.NPSTSLGPTLEPEEVNR.L      | 2             | 3.3771        | Q8NBQ5             |
|                                                                                               | DHRS8_HUMAN      | K.NPSTSLGPTLEPEEVNR.L      | 2             | 3.3846        | Q8NBQ5             |
| <b><i>Derlin-1 - Homo sapiens (Human)</i></b>                                                 |                  |                            |               |               |                    |
|                                                                                               | DERL1_HUMAN      | K.LGLISPAYLFLWPEAFLYR.F    | 2             | 3.5409        | Q9BUN8             |
| <b><i>Diacylglycerol O-acyltransferase 1 - Homo sapiens (Human)</i></b>                       |                  |                            |               |               |                    |

| <i>Protein</i>                                                                                             | <i>Reference</i> | <i>Peptide sequence</i>       | <i>Charge</i> | <i>XCorr*</i> | <i>Accession**</i> |
|------------------------------------------------------------------------------------------------------------|------------------|-------------------------------|---------------|---------------|--------------------|
|                                                                                                            | DGAT1_HUMAN      | R.DAAAGPDVGAAGDAPAPAPNK.D     | 2             | 3.232         | O75907             |
| <b><i>DNA damage-binding protein 1 - Homo sapiens (Human)</i></b>                                          |                  |                               |               |               |                    |
|                                                                                                            | DDB1_HUMAN       | K.PTAVNGC#VTGHFTSAEDLNLLIAK.N | 2             | 2.5771        | Q16531             |
| <b><i>DNA topoisomerase 3-alpha - Homo sapiens (Human)</i></b>                                             |                  |                               |               |               |                    |
|                                                                                                            | TOP3A_HUMAN      | K.LLTEADLIALM*EK.H            | 2             | 2.3945        | Q13472             |
| <b><i>DNA-dependent protein kinase catalytic subunit - Homo sapiens (Human)</i></b>                        |                  |                               |               |               |                    |
|                                                                                                            | PRKDC_HUMAN      | R.LGASLAFNNIYR.E              | 2             | 2.4674        | P78527             |
| <b><i>DnaJ homolog subfamily C member 13 - Homo sapiens (Human)</i></b>                                    |                  |                               |               |               |                    |
|                                                                                                            | DNJCD_HUMAN      | R.LGGYLAEEQATPENPTIR.K        | 2             | 2.8369        | O75165             |
| <b><i>Dolichyl-diphosphooligosaccharide-protein glycosyltransferase - Homo sapiens (Human)</i></b>         |                  |                               |               |               |                    |
|                                                                                                            | Q5VWA5_HUMAN     | K.LPDVYGVFQFK.V               | 2             | 2.9471        | Q5VWA5             |
|                                                                                                            | Q5VWA5_HUMAN     | K.LPDVYGVFQFK.V               | 2             | 2.3308        | Q5VWA5             |
|                                                                                                            | Q5VWA5_HUMAN     | K.LPDVYGVFQFK.V               | 2             | 2.4627        | Q5VWA5             |
|                                                                                                            | Q5VWA5_HUMAN     | K.LPDVYGVFQFK.V               | 2             | 2.3388        | Q5VWA5             |
|                                                                                                            | Q5VWA5_HUMAN     | R.YSQTGNYELAVLSR.W            | 2             | 4.0576        | Q5VWA5             |
| <b><i>Dolichyl-diphosphooligosaccharide--protein glycosyltransferase 67 kDa subunit precursor - Ho</i></b> |                  |                               |               |               |                    |
|                                                                                                            | RIB1_HUMAN       | R.HFDETVNR.Y                  | 2             | 2.4849        | P04843             |
|                                                                                                            | RIB1_HUMAN       | K.ALTSEIALLQSR.L              | 2             | 2.5259        | P04843             |
|                                                                                                            | RIB1_HUMAN       | R.HFDETVNR.Y                  | 2             | 2.6126        | P04843             |
|                                                                                                            | RIB1_HUMAN       | R.HFDETVNR.Y                  | 2             | 2.4905        | P04843             |
|                                                                                                            | RIB1_HUMAN       | K.ALTSEIALLQSR.L              | 2             | 2.7355        | P04843             |
| <b><i>Dolichyl-diphosphooligosaccharide--protein glycosyltransferase subunit DAD1 - Homo sapiens</i></b>   |                  |                               |               |               |                    |
|                                                                                                            | DAD1_HUMAN       | R.FLEEYLSSTPQR.L              | 2             | 2.4675        | P61803             |
|                                                                                                            | DAD1_HUMAN       | R.FLEEYLSSTPQR.L              | 2             | 2.7359        | P61803             |
|                                                                                                            | DAD1_HUMAN       | K.ADFQGISPER.A                | 2             | 2.3418        | P61803             |
| <b><i>Dolichyl-diphosphooligosaccharide--protein glycosyltransferase subunit STT3A - Homo sapiens</i></b>  |                  |                               |               |               |                    |
|                                                                                                            | STT3A_HUMAN      | R.FYSLLDPSYAK.N               | 2             | 2.3611        | P46977             |
|                                                                                                            | STT3A_HUMAN      | R.FYSLLDPSYAK.N               | 2             | 3.033         | P46977             |
| <b><i>Dolichyl-diphosphooligosaccharide--protein glycosyltransferase subunit STT3B - Homo sapiens</i></b>  |                  |                               |               |               |                    |
|                                                                                                            | STT3B_HUMAN      | R.NILDDFREAYFWLR.Q            | 2             | 2.5045        | Q8TCJ2             |
|                                                                                                            | STT3B_HUMAN      | R.NILDDFREAYFWLR.Q            | 2             | 3.0089        | Q8TCJ2             |
| <b><i>Elongation factor 1-alpha 1 - Homo sapiens (Human)</i></b>                                           |                  |                               |               |               |                    |
|                                                                                                            | EF1A1_HUMAN      | K.STTTGHLIYK.C                | 2             | 2.4464        | P68104             |
|                                                                                                            | EF1A1_HUMAN      | K.IGGIGTVPVGR.V               | 2             | 2.3508        | P68104             |

| <i>Protein</i>                                                                           | <i>Reference</i> | <i>Peptide sequence</i> | <i>Charge</i> | <i>XCorr*</i> | <i>Accession**</i> |
|------------------------------------------------------------------------------------------|------------------|-------------------------|---------------|---------------|--------------------|
|                                                                                          | EF1A1_HUMAN      | K.IGGIGTVPVGR.V         | 2             | 2.53          | P68104             |
|                                                                                          | EF1A1_HUMAN      | K.STTTGHLIYK.C          | 2             | 2.92          | P68104             |
|                                                                                          | EF1A1_HUMAN      | K.IGGIGTVPVGR.V         | 2             | 2.6054        | P68104             |
|                                                                                          | EF1A1_HUMAN      | R.EHALLAYTLGVK.Q        | 2             | 2.3042        | P68104             |
| <b><i>Elongation of very long chain fatty acids protein 1 - Homo sapiens (Human)</i></b> |                  |                         |               |               |                    |
|                                                                                          | ELOV1_HUMAN      | R.ALQQNGAPGIAK.V        | 2             | 2.7113        | Q9BW60             |
|                                                                                          | ELOV1_HUMAN      | R.ALQQNGAPGIAK.V        | 2             | 2.9035        | Q9BW60             |
| <b><i>Endoplasmic precursor - Homo sapiens (Human)</i></b>                               |                  |                         |               |               |                    |
|                                                                                          | ENPL_HUMAN       | K.GVVDSDDLPLNVSR.E      | 2             | 2.6557        | P14625             |
|                                                                                          | ENPL_HUMAN       | K.GVVDSDDLPLNVSR.E      | 2             | 2.3719        | P14625             |
| <b><i>Eosinophil cationic protein precursor - Homo sapiens (Human)</i></b>               |                  |                         |               |               |                    |
|                                                                                          | ECP_HUMAN        | R.YPVVPHLDTTI.-         | 2             | 2.8613        | P12724             |
| <b><i>ER lumen protein retaining receptor 2 - Homo sapiens (Human)</i></b>               |                  |                         |               |               |                    |
|                                                                                          | ERD22_HUMAN      | R.LTGDLSHLAAIVILLK.I    | 3             | 3.9103        | P33947             |
|                                                                                          | ERD22_HUMAN      | R.LTGDLSHLAAIVILLK.I    | 2             | 3.913         | P33947             |
|                                                                                          | ERD22_HUMAN      | R.LTGDLSHLAAIVILLK.I    | 2             | 3.8056        | P33947             |
| <b><i>Erlin-1 precursor - Homo sapiens (Human)</i></b>                                   |                  |                         |               |               |                    |
|                                                                                          | ERLN1_HUMAN      | R.SVQTTLQTDEVK.N        | 2             | 2.7331        | O75477             |
|                                                                                          | ERLN1_HUMAN      | R.SVQTTLQTDEVK.N        | 2             | 2.6926        | O75477             |
|                                                                                          | ERLN1_HUMAN      | K.EALEPSGENVIQNK.E      | 2             | 2.8835        | O75477             |
| <b><i>Erlin-2 precursor - Homo sapiens (Human)</i></b>                                   |                  |                         |               |               |                    |
|                                                                                          | ERLN2_HUMAN      | K.VAQVAEITYGQK.V        | 2             | 2.8652        | O94905             |
| <b><i>Erythrocyte band 7 integral membrane protein - Homo sapiens (Human)</i></b>        |                  |                         |               |               |                    |
|                                                                                          | STOM_HUMAN       | R.AMAAEAEASR.E          | 2             | 2.6783        | P27105             |
|                                                                                          | STOM_HUMAN       | K.NSTIVFPLPIDMLQGIGAK.H | 2             | 3.2485        | P27105             |
|                                                                                          | STOM_HUMAN       | K.NSTIVFPLPIDMLQGIGAK.H | 2             | 3.8223        | P27105             |
|                                                                                          | STOM_HUMAN       | R.AMAAEAEASR.E          | 2             | 2.7011        | P27105             |
|                                                                                          | STOM_HUMAN       | R.TISFDIPPQEILTK.D      | 2             | 2.499         | P27105             |
|                                                                                          | STOM_HUMAN       | R.TISFDIPPQEILTK.D      | 2             | 2.4574        | P27105             |
|                                                                                          | STOM_HUMAN       | R.AMAAEAEASR.E          | 2             | 2.7773        | P27105             |
|                                                                                          | STOM_HUMAN       | K.EASMVITESPAALQLR.Y    | 2             | 3.2488        | P27105             |
|                                                                                          | STOM_HUMAN       | K.NSTIVFPLPIDMLQGIGAK.H | 2             | 2.6316        | P27105             |
|                                                                                          | STOM_HUMAN       | R.AMAAEAEASR.E          | 2             | 2.6246        | P27105             |
|                                                                                          | STOM_HUMAN       | K.VIAAEGEM*NASR.A       | 2             | 2.8428        | P27105             |
|                                                                                          | STOM_HUMAN       | K.VIAAEGEMNASR.A        | 2             | 3.3748        | P27105             |

| <i>Protein</i>                                                                                                | <i>Reference</i> | <i>Peptide sequence</i>    | <i>Charge</i> | <i>XCorr*</i> | <i>Accession**</i> |
|---------------------------------------------------------------------------------------------------------------|------------------|----------------------------|---------------|---------------|--------------------|
|                                                                                                               | STOM_HUMAN       | R.VQNATLAVANITNADSATR.L    | 2             | 2.9789        | P27105             |
|                                                                                                               | STOM_HUMAN       | K.EASMVITESPAALQLR.Y       | 2             | 4.3809        | P27105             |
| <b><i>Eukaryotic initiation factor 4A-I - Homo sapiens (Human)</i></b>                                        |                  |                            |               |               |                    |
|                                                                                                               | IF4A1_HUMAN      | K.GYDVIAQAQSGTGK.T         | 2             | 3.82          | P60842             |
|                                                                                                               | IF4A1_HUMAN      | K.MFVLDEADEMLSR.G          | 2             | 3.9323        | P60842             |
|                                                                                                               | IF4A1_HUMAN      | K.MFVLDEADEMLSR.G          | 2             | 3.8905        | P60842             |
|                                                                                                               | IF4A1_HUMAN      | K.MFVLDEADEMLSR.G          | 2             | 4.2433        | P60842             |
|                                                                                                               | IF4A1_HUMAN      | K.GYDVIAQAQSGTGK.T         | 2             | 3.945         | P60842             |
|                                                                                                               | IF4A1_HUMAN      | K.MFVLDEADEMLSR.G          | 2             | 4.1378        | P60842             |
| <b><i>Eukaryotic translation initiation factor 3 subunit 10 - Homo sapiens (Human)</i></b>                    |                  |                            |               |               |                    |
|                                                                                                               | IF3A_HUMAN       | R.FNVLQYVVPEVK.D           | 2             | 2.6427        | Q14152             |
|                                                                                                               | IF3A_HUMAN       | R.FNVLQYVVPEVK.D           | 2             | 2.7388        | Q14152             |
| <b><i>Eukaryotic translation initiation factor 3 subunit 6-interacting protein - Homo sapiens (Human)</i></b> |                  |                            |               |               |                    |
|                                                                                                               | IF36I_HUMAN      | K.MLGYFSLVGLLR.L           | 2             | 2.6107        | Q9Y262             |
| <b><i>Exportin-1 - Homo sapiens (Human)</i></b>                                                               |                  |                            |               |               |                    |
|                                                                                                               | XPO1_HUMAN       | K.YYGLQILENVIK.T           | 2             | 2.5155        | O14980             |
| <b><i>Ferritin light chain - Homo sapiens (Human)</i></b>                                                     |                  |                            |               |               |                    |
|                                                                                                               | FRIL_HUMAN       | R.LGGPEAGLGEYLFER.L        | 2             | 2.3823        | P02792             |
| <b><i>Filamin-A - Homo sapiens (Human)</i></b>                                                                |                  |                            |               |               |                    |
|                                                                                                               | FLNA_HUMAN       | R.SPYTVTVGQAC#NPSAC#R.A    | 2             | 2.7651        | P21333             |
|                                                                                                               | FLNA_HUMAN       | K.VTAQGPGLPSGNIANK.T       | 2             | 2.9905        | P21333             |
|                                                                                                               | FLNA_HUMAN       | K.VTAQGPGLPSGNIANK.T       | 2             | 2.6292        | P21333             |
|                                                                                                               | FLNA_HUMAN       | R.SPYTVTVGQAC#NPSAC#R.A    | 2             | 3.1685        | P21333             |
|                                                                                                               | FLNA_HUMAN       | R.AYGPGIEPTGNMVK.K         | 2             | 2.3232        | P21333             |
|                                                                                                               | FLNA_HUMAN       | R.VTYC#PTEPGNYIINIK.F      | 2             | 2.368         | P21333             |
|                                                                                                               | FLNA_HUMAN       | R.AGQSAAGAAPGGGVDR.D       | 2             | 2.5456        | P21333             |
|                                                                                                               | FLNA_HUMAN       | R.SPYTVTVGQAC#NPSAC#R.A    | 2             | 3.2514        | P21333             |
|                                                                                                               | FLNA_HUMAN       | K.VDINTEDLEDGTC#R.V        | 2             | 2.7771        | P21333             |
|                                                                                                               | FLNA_HUMAN       | K.YTPVQQGPVGVNVTYGGDPIPK.S | 2             | 4.0491        | P21333             |
|                                                                                                               | FLNA_HUMAN       | K.YTPVQQGPVGVNVTYGGDPIPK.S | 2             | 3.2362        | P21333             |
|                                                                                                               | FLNA_HUMAN       | K.YTPVQQGPVGVNVTYGGDPIPK.S | 2             | 2.9129        | P21333             |
| <b><i>Formin-like protein 3 - Homo sapiens (Human)</i></b>                                                    |                  |                            |               |               |                    |
|                                                                                                               | FMNL3_HUMAN      | R.NFLSTNEGKLDKLR.D         | 2             | 2.5592        | Q81VF7             |

***Full-length cDNA clone CS0DI085YI08 of Placenta of Homo sapiens - Homo sapiens (Human)***



| <i>Protein</i>                                                                             | <i>Reference</i> | <i>Peptide sequence</i>  | <i>Charge</i> | <i>XCorr*</i> | <i>Accession**</i> |
|--------------------------------------------------------------------------------------------|------------------|--------------------------|---------------|---------------|--------------------|
|                                                                                            | Q86TV4_HUMAN     | R.PTC#PSSSGGPARELSSRLR.I | 2             | 2.7222        | Q86TV4             |
|                                                                                            | Q86TV4_HUMAN     | R.PTC#PSSSGGPARELSSRLR.I | 2             | 2.8843        | Q86TV4             |
| <b><i>Glia maturation factor gamma - Homo sapiens (Human)</i></b>                          |                  |                          |               |               |                    |
|                                                                                            | GMFG_HUMAN       | K.ETDNAAIIMKVDK.D        | 2             | 2.5641        | O60234             |
| <b><i>Glyceraldehyde-3-phosphate dehydrogenase - Homo sapiens (Human)</i></b>              |                  |                          |               |               |                    |
|                                                                                            | G3P_HUMAN        | K.LVINGNPITIFQER.D       | 2             | 2.7138        | P04406             |
| <b><i>Glycoprotein Ib beta - Homo sapiens (Human)</i></b>                                  |                  |                          |               |               |                    |
|                                                                                            | Q14422_HUMAN     | R.LSLTDPLVAER.A          | 2             | 2.4589        | Q14422             |
| <b><i>Golgi-associated plant pathogenesis-related protein 1 - Homo sapiens (Human)</i></b> |                  |                          |               |               |                    |
|                                                                                            | GAPR1_HUMAN      | R.EAQQYSEALASTR.I        | 2             | 3.1934        | Q9H4G4             |
|                                                                                            | GAPR1_HUMAN      | R.EAQQYSEALASTR.I        | 2             | 3.03          | Q9H4G4             |
|                                                                                            | GAPR1_HUMAN      | K.ASASDGSSFVVAR.Y        | 2             | 2.6071        | Q9H4G4             |
|                                                                                            | GAPR1_HUMAN      | R.EAQQYSEALASTR.I        | 2             | 3.2899        | Q9H4G4             |
|                                                                                            | GAPR1_HUMAN      | K.HGVPPLK.L              | 2             | 2.584         | Q9H4G4             |
|                                                                                            | GAPR1_HUMAN      | R.EAQQYSEALASTR.I        | 2             | 3.1447        | Q9H4G4             |
|                                                                                            | GAPR1_HUMAN      | K.ASASDGSSFVVAR.Y        | 2             | 2.6673        | Q9H4G4             |
| <b><i>G-protein coupled receptor 98 precursor - Homo sapiens (Human)</i></b>               |                  |                          |               |               |                    |
|                                                                                            | GPR98_HUMAN      | R.NIIVSEDTQM*IR.L        | 2             | 2.458         | Q8WXC9             |
| <b><i>Growth hormone-inducible transmembrane protein - Homo sapiens (Human)</i></b>        |                  |                          |               |               |                    |
|                                                                                            | GHITM_HUMAN      | R.VATMLATGGNR.K          | 2             | 2.6046        | Q9H3K2             |
|                                                                                            | GHITM_HUMAN      | K.YDPINSMLSIYMDTLNIFMR.V | 2             | 4.6025        | Q9H3K2             |
|                                                                                            | GHITM_HUMAN      | K.YDPINSMLSIYMDTLNIFMR.V | 2             | 4.4829        | Q9H3K2             |
|                                                                                            | GHITM_HUMAN      | R.VATMLATGGNR.K          | 2             | 2.6975        | Q9H3K2             |
|                                                                                            | GHITM_HUMAN      | R.VATMLATGGNR.K          | 2             | 2.523         | Q9H3K2             |
|                                                                                            | GHITM_HUMAN      | K.YDPINSMLSIYMDTLNIFMR.V | 2             | 3.9739        | Q9H3K2             |
|                                                                                            | GHITM_HUMAN      | R.TPVL MNFMMR.G          | 2             | 2.3116        | Q9H3K2             |
| <b><i>Growth-arrest-specific protein 2 - Homo sapiens (Human)</i></b>                      |                  |                          |               |               |                    |
|                                                                                            | GAS2_HUMAN       | -.M*C#TALSPKVR.S         | 2             | 2.4491        | O43903             |
| <b><i>GTPase IMAP family member 1 - Homo sapiens (Human)</i></b>                           |                  |                          |               |               |                    |
|                                                                                            | GIMA1_HUMAN      | R.FTAQDQQAVR.Q           | 2             | 3.2476        | Q8WWP7             |
|                                                                                            | GIMA1_HUMAN      | R.FTAQDQQAVR.Q           | 2             | 3.4339        | Q8WWP7             |
|                                                                                            | GIMA1_HUMAN      | R.FTAQDQQAVR.Q           | 2             | 2.3331        | Q8WWP7             |
|                                                                                            | GIMA1_HUMAN      | R.FTAQDQQAVR.Q           | 2             | 3.2506        | Q8WWP7             |
|                                                                                            | GIMA1_HUMAN      | R.FTAQDQQAVR.Q           | 2             | 3.9412        | Q8WWP7             |

| <i>Protein</i>                                                                                | <i>Reference</i> | <i>Peptide sequence</i> | <i>Charge</i> | <i>XCorr*</i> | <i>Accession**</i> |
|-----------------------------------------------------------------------------------------------|------------------|-------------------------|---------------|---------------|--------------------|
| <b><i>Guanine nucleotide binding protein, alpha transducing 3 - Homo sapiens (Human)</i></b>  |                  |                         |               |               |                    |
| A4D1B2_HUMAN                                                                                  |                  | K.AM*TTLGIDYVNPR.S      | 2             | 2.4254        | A4D1B2             |
| <b><i>Guanine nucleotide-binding protein G(i), alpha-2 subunit - Homo sapiens (Human)</i></b> |                  |                         |               |               |                    |
| GNAI2_HUMAN                                                                                   |                  | K.AMGNLQIDFADPSR.A      | 2             | 3.7287        | P04899             |
| GNAI2_HUMAN                                                                                   |                  | R.EYQLNDSAAYYLNDLER.I   | 2             | 3.3445        | P04899             |
| GNAI2_HUMAN                                                                                   |                  | K.AMGNLQIDFADPSR.A      | 2             | 3.1274        | P04899             |
| GNAI2_HUMAN                                                                                   |                  | K.AMGNLQIDFADPSR.A      | 2             | 3.4711        | P04899             |
| GNAI2_HUMAN                                                                                   |                  | R.AVVYSNTIQSIMAIVK.A    | 2             | 3.8353        | P04899             |
| GNAI2_HUMAN                                                                                   |                  | K.AMGNLQIDFADPSR.A      | 2             | 3.306         | P04899             |
| GNAI2_HUMAN                                                                                   |                  | K.AMGNLQIDFADPSR.A      | 2             | 3.3203        | P04899             |
| GNAI2_HUMAN                                                                                   |                  | R.EYQLNDSAAYYLNDLER.I   | 2             | 2.4384        | P04899             |
| GNAI2_HUMAN                                                                                   |                  | K.YDEAASYIQSK.F         | 2             | 2.4786        | P04899             |
| GNAI2_HUMAN                                                                                   |                  | R.IAQSDYIPTQQDVL.R.T    | 2             | 4.048         | P04899             |
| GNAI2_HUMAN                                                                                   |                  | K.AM*GNLQIDFADPSR.A     | 2             | 2.8106        | P04899             |
| GNAI2_HUMAN                                                                                   |                  | K.AMGNLQIDFADPSR.A      | 2             | 3.2318        | P04899             |
| GNAI2_HUMAN                                                                                   |                  | R.SREYQLNDSAAYYLNDLER.I | 2             | 3.251         | P04899             |
| <b><i>Heat shock protein HSP 90-alpha - Homo sapiens (Human)</i></b>                          |                  |                         |               |               |                    |
| HS90A_HUMAN                                                                                   |                  | K.YIDQEELNK.T           | 2             | 2.4172        | P07900             |
| <b><i>Heat shock protein HSP 90-beta - Homo sapiens (Human)</i></b>                           |                  |                         |               |               |                    |
| HS90B_HUMAN                                                                                   |                  | R.NPDDITQEEYGEFYK.S     | 2             | 2.9143        | P08238             |
| <b><i>Heavy chain Fab - Homo sapiens (Human)</i></b>                                          |                  |                         |               |               |                    |
| A2NYU6_HUMAN                                                                                  |                  | K.SRVTMVSDTSKNQVSLR.L   | 2             | 2.3397        | A2NYU6             |
| <b><i>Heterogeneous nuclear ribonucleoprotein H - Homo sapiens (Human)</i></b>                |                  |                         |               |               |                    |
| HNRH1_HUMAN                                                                                   |                  | R.ATENDIYNFFSPLNPVR.V   | 2             | 2.4681        | P31943             |
| <b><i>Heterogeneous nuclear ribonucleoprotein K - Homo sapiens (Human)</i></b>                |                  |                         |               |               |                    |
| HNRPK_HUMAN                                                                                   |                  | K.IILDLISESPIK.G        | 2             | 2.6645        | P61978             |
| HNRPK_HUMAN                                                                                   |                  | K.IILDLISESPIK.G        | 2             | 2.3501        | P61978             |
| <b><i>Heterogeneous nuclear ribonucleoprotein U - Homo sapiens (Human)</i></b>                |                  |                         |               |               |                    |
| HNRPU_HUMAN                                                                                   |                  | R.NFILDQTNVSAQAQR.R     | 2             | 2.9633        | Q00839             |
| <b><i>Hexokinase-1 - Homo sapiens (Human)</i></b>                                             |                  |                         |               |               |                    |
| HXK1_HUMAN                                                                                    |                  | K.MVSGMYLGELVR.L        | 2             | 2.5251        | P19367             |
| HXK1_HUMAN                                                                                    |                  | K.MISGMYLGEIVR.N        | 2             | 2.6037        | P19367             |
| HXK1_HUMAN                                                                                    |                  | R.LSDETLIDIMTR.F        | 2             | 2.6818        | P19367             |
| <b><i>Hexokinase-3 - Homo sapiens (Human)</i></b>                                             |                  |                         |               |               |                    |

| <i>Protein</i> | <i>Reference</i> | <i>Peptide sequence</i>  | <i>Charge</i> | <i>XCorr*</i> | <i>Accession**</i> |
|----------------|------------------|--------------------------|---------------|---------------|--------------------|
| HXK3_HUMAN     |                  | K.FLSEIESDSLALR.Q        | 2             | 3.2554        | P52790             |
| HXK3_HUMAN     |                  | R.QLGLDQGILLNWTG.G       | 2             | 2.9612        | P52790             |
| HXK3_HUMAN     |                  | K.QGLSGQSLPLGFTFSFPC#R.Q | 2             | 3.086         | P52790             |
| HXK3_HUMAN     |                  | K.FLSEIESDSLALR.Q        | 2             | 3.1645        | P52790             |
| HXK3_HUMAN     |                  | K.FLSEIESDSLALR.Q        | 2             | 2.9111        | P52790             |
| HXK3_HUMAN     |                  | K.FLSEIESDSLALR.Q        | 2             | 3.0962        | P52790             |
| HXK3_HUMAN     |                  | K.ASDC#EGQDVVSLLR.E      | 2             | 2.3637        | P52790             |
| HXK3_HUMAN     |                  | K.FLSEIESDSLALR.Q        | 2             | 3.0211        | P52790             |
| HXK3_HUMAN     |                  | K.FLSEIESDSLALR.Q        | 2             | 2.5559        | P52790             |

***High affinity immunoglobulin epsilon receptor subunit gamma precursor - Homo sapiens (Hum)***

|             |  |                 |   |        |        |
|-------------|--|-----------------|---|--------|--------|
| FCERG_HUMAN |  | K.SDGVYTGLSTR.N | 2 | 2.4618 | P30273 |
| FCERG_HUMAN |  | K.SDGVYTGLSTR.N | 2 | 2.937  | P30273 |
| FCERG_HUMAN |  | K.SDGVYTGLSTR.N | 2 | 2.834  | P30273 |
| FCERG_HUMAN |  | K.SDGVYTGLSTR.N | 2 | 2.5583 | P30273 |

***Histone H1.1 - Homo sapiens (Human)***

|           |  |                     |   |        |        |
|-----------|--|---------------------|---|--------|--------|
| H11_HUMAN |  | K.ALAAAGYDVEK.N     | 2 | 2.5601 | Q02539 |
| H11_HUMAN |  | K.ALAAAGYDVEK.N     | 2 | 2.647  | Q02539 |
| H11_HUMAN |  | K.ALAAAGYDVEK.N     | 2 | 2.4942 | Q02539 |
| H11_HUMAN |  | K.ALAAAGYDVEK.N     | 2 | 2.3085 | Q02539 |
| H11_HUMAN |  | K.ALAAAGYDVEKNNSR.I | 2 | 2.8677 | Q02539 |

***Histone H1.5 - Homo sapiens (Human)***

|           |  |                 |   |        |        |
|-----------|--|-----------------|---|--------|--------|
| H15_HUMAN |  | K.ALAAGGYDVEK.N | 2 | 2.4425 | P16401 |
| H15_HUMAN |  | K.ALAAGGYDVEK.N | 2 | 2.6342 | P16401 |
| H15_HUMAN |  | K.ALAAGGYDVEK.N | 2 | 2.6702 | P16401 |
| H15_HUMAN |  | K.ALAAGGYDVEK.N | 2 | 2.6067 | P16401 |

***Histone H2A type 1-A - Homo sapiens (Human)***

|             |  |               |   |        |        |
|-------------|--|---------------|---|--------|--------|
| H2A1A_HUMAN |  | R.HLQLAIR.N   | 2 | 2.4864 | Q96QV6 |
| H2A1A_HUMAN |  | R.AGLQFPVGR.I | 2 | 2.5754 | Q96QV6 |
| H2A1A_HUMAN |  | R.AGLQFPVGR.I | 2 | 2.6349 | Q96QV6 |
| H2A1A_HUMAN |  | R.HLQLAIR.N   | 2 | 2.6381 | Q96QV6 |
| H2A1A_HUMAN |  | R.HLQLAIR.N   | 2 | 2.3771 | Q96QV6 |
| H2A1A_HUMAN |  | R.AGLQFPVGR.I | 2 | 2.5374 | Q96QV6 |
| H2A1A_HUMAN |  | R.HLQLAIR.N   | 2 | 2.3884 | Q96QV6 |
| H2A1A_HUMAN |  | R.AGLQFPVGR.I | 2 | 2.4881 | Q96QV6 |
| H2A1A_HUMAN |  | R.HLQLAIR.N   | 2 | 2.575  | Q96QV6 |

| <i>Protein</i>                                            | <i>Reference</i> | <i>Peptide sequence</i>             | <i>Charge</i> | <i>XCorr*</i> | <i>Accession**</i> |
|-----------------------------------------------------------|------------------|-------------------------------------|---------------|---------------|--------------------|
| H2A1A_HUMAN                                               |                  | R.HLQLAIR.N                         | 2             | 2.8487        | Q96QV6             |
| H2A1A_HUMAN                                               |                  | R.AGLQFPVGR.I                       | 2             | 2.3302        | Q96QV6             |
| <b><i>Histone H2A type 1-B - Homo sapiens (Human)</i></b> |                  |                                     |               |               |                    |
| H2A1B_HUMAN                                               |                  | R.VGAGAPVYLAADVLEYLTAIEILELAGNAAR.D | 2             | 4.8376        | P04908             |
| H2A1B_HUMAN                                               |                  | R.HLQLAIRNDEELNKLLGR.V              | 4             | 4.6656        | P04908             |
| H2A1B_HUMAN                                               |                  | R.VTIAQGGVLPNIQAVLLPK.K             | 2             | 2.3523        | P04908             |
| H2A1B_HUMAN                                               |                  | R.VGAGAPVYLAADVLEYLTAIEILELAGNAAR.D | 2             | 4.4231        | P04908             |
| H2A1B_HUMAN                                               |                  | R.VGAGAPVYLAADVLEYLTAIEILELAGNAAR.D | 2             | 5.1416        | P04908             |
| H2A1B_HUMAN                                               |                  | R.VGAGAPVYLAADVLEYLTAIEILELAGNAAR.D | 2             | 4.9606        | P04908             |
| H2A1B_HUMAN                                               |                  | R.HLQLAIRNDEELNKLLGR.V              | 2             | 4.0312        | P04908             |
| <b><i>Histone H2A type 1-D - Homo sapiens (Human)</i></b> |                  |                                     |               |               |                    |
| H2A1D_HUMAN                                               |                  | R.NDEELNKLLGK.V                     | 2             | 3.2431        | P20671             |
| H2A1D_HUMAN                                               |                  | R.NDEELNKLLGK.V                     | 2             | 3.3089        | P20671             |
| H2A1D_HUMAN                                               |                  | R.NDEELNKLLGK.V                     | 2             | 3.5046        | P20671             |
| H2A1D_HUMAN                                               |                  | R.NDEELNKLLGK.V                     | 2             | 3.0467        | P20671             |
| H2A1D_HUMAN                                               |                  | R.NDEELNKLLGK.V                     | 2             | 3.3013        | P20671             |
| H2A1D_HUMAN                                               |                  | R.NDEELNKLLGK.V                     | 2             | 3.3202        | P20671             |
| H2A1D_HUMAN                                               |                  | R.HLQLAIRNDEELNKLLGK.V              | 3             | 3.8348        | P20671             |
| H2A1D_HUMAN                                               |                  | R.HLQLAIRNDEELNKLLGK.V              | 2             | 3.5893        | P20671             |
| <b><i>Histone H2A type 2-A - Homo sapiens (Human)</i></b> |                  |                                     |               |               |                    |
| H2A2A_HUMAN                                               |                  | R.VGAGAPVYMAADVLEYLTAIEILELAGNAAR.D | 4             | 5.1835        | Q6FI13             |
| H2A2A_HUMAN                                               |                  | R.VGAGAPVYMAADVLEYLTAIEILELAGNAAR.D | 2             | 4.0911        | Q6FI13             |
| H2A2A_HUMAN                                               |                  | R.VGAGAPVYMAADVLEYLTAIEILELAGNAAR.D | 2             | 4.3754        | Q6FI13             |
| H2A2A_HUMAN                                               |                  | R.VGAGAPVYMAADVLEYLTAIEILELAGNAAR.D | 2             | 4.9873        | Q6FI13             |
| H2A2A_HUMAN                                               |                  | R.VGAGAPVYMAADVLEYLTAIEILELAGNAAR.D | 2             | 3.7722        | Q6FI13             |
| <b><i>Histone H2AV - Homo sapiens (Human)</i></b>         |                  |                                     |               |               |                    |
| H2AV_HUMAN                                                |                  | R.VGATAAVYSAAILEYLTAEVLELAGNASK.D   | 4             | 6.3814        | Q71UI9             |
| <b><i>Histone H2B type 1-B - Homo sapiens (Human)</i></b> |                  |                                     |               |               |                    |
| H2B1B_HUMAN                                               |                  | R.KESYSIYVYK.V                      | 2             | 2.3926        | P33778             |
| H2B1B_HUMAN                                               |                  | R.KESYSIYVYK.V                      | 2             | 2.8637        | P33778             |
| H2B1B_HUMAN                                               |                  | K.AM*GIM*NSFVNDIFER.I               | 2             | 3.7546        | P33778             |
| H2B1B_HUMAN                                               |                  | K.AMGIM*NSFVNDIFER.I                | 2             | 3.9302        | P33778             |
| H2B1B_HUMAN                                               |                  | K.AM*GIMNSFVNDIFER.I                | 2             | 5.0029        | P33778             |
| H2B1B_HUMAN                                               |                  | K.AMGIMNSFVNDIFER.I                 | 2             | 4.7184        | P33778             |
| H2B1B_HUMAN                                               |                  | K.AMGIMNSFVNDIFER.I                 | 2             | 3.8548        | P33778             |

| <i>Protein</i> | <i>Reference</i> | <i>Peptide sequence</i>    | <i>Charge</i> | <i>XCorr*</i> | <i>Accession**</i> |
|----------------|------------------|----------------------------|---------------|---------------|--------------------|
| H2B1B_HUMAN    |                  | K.AMGIMNSFVNDIFER.I        | 2             | 4.0424        | P33778             |
| H2B1B_HUMAN    |                  | R.KESYSIYVYK.V             | 2             | 2.3577        | P33778             |
| H2B1B_HUMAN    |                  | K.AM*GIM*NSFVNDIFER.I      | 2             | 3.5253        | P33778             |
| H2B1B_HUMAN    |                  | K.AM*GIMNSFVNDIFER.I       | 2             | 3.9563        | P33778             |
| H2B1B_HUMAN    |                  | K.AM*GIMNSFVNDIFER.I       | 2             | 4.4609        | P33778             |
| H2B1B_HUMAN    |                  | K.AMGIMNSFVNDIFER.I        | 2             | 4.8814        | P33778             |
| H2B1B_HUMAN    |                  | K.AMGIMNSFVNDIFER.I        | 2             | 5.0904        | P33778             |
| H2B1B_HUMAN    |                  | K.AMGIMNSFVNDIFERIAGEASR.L | 2             | 3.2958        | P33778             |
| H2B1B_HUMAN    |                  | R.KESYSIYVYK.V             | 2             | 2.3729        | P33778             |
| H2B1B_HUMAN    |                  | R.KESYSIYVYK.V             | 2             | 3.0414        | P33778             |
| H2B1B_HUMAN    |                  | K.AMGIM*NSFVNDIFER.I       | 2             | 2.9906        | P33778             |
| H2B1B_HUMAN    |                  | K.AMGIM*NSFVNDIFER.I       | 2             | 4.691         | P33778             |
| H2B1B_HUMAN    |                  | K.AM*GIMNSFVNDIFER.I       | 2             | 4.619         | P33778             |
| H2B1B_HUMAN    |                  | K.AMGIMNSFVNDIFER.I        | 2             | 4.3402        | P33778             |
| H2B1B_HUMAN    |                  | K.AMGIMNSFVNDIFER.I        | 2             | 4.639         | P33778             |
| H2B1B_HUMAN    |                  | K.AMGIMNSFVNDIFER.I        | 2             | 3.0942        | P33778             |
| H2B1B_HUMAN    |                  | K.AMGIM*NSFVNDIFER.I       | 2             | 3.1586        | P33778             |
| H2B1B_HUMAN    |                  | R.KESYSIYVYK.V             | 2             | 3.5188        | P33778             |
| H2B1B_HUMAN    |                  | K.AM*GIM*NSFVNDIFER.I      | 2             | 3.2665        | P33778             |
| H2B1B_HUMAN    |                  | K.AMGIM*NSFVNDIFER.I       | 2             | 2.5672        | P33778             |
| H2B1B_HUMAN    |                  | K.AMGIM*NSFVNDIFER.I       | 2             | 2.9967        | P33778             |
| H2B1B_HUMAN    |                  | K.AMGIM*NSFVNDIFER.I       | 2             | 2.6764        | P33778             |
| H2B1B_HUMAN    |                  | K.AMGIMNSFVNDIFER.I        | 2             | 3.6348        | P33778             |
| H2B1B_HUMAN    |                  | K.AMGIMNSFVNDIFER.I        | 2             | 4.4809        | P33778             |
| H2B1B_HUMAN    |                  | K.AMGIMNSFVNDIFER.I        | 2             | 2.5541        | P33778             |
| H2B1B_HUMAN    |                  | K.AMGIMNSFVNDIFER.I        | 1             | 3.0751        | P33778             |

***Histone H2B type 1-C/E/F/G/I - Homo sapiens (Human)***

|             |  |                |   |        |        |
|-------------|--|----------------|---|--------|--------|
| H2B1C_HUMAN |  | R.KESYSVYVYK.V | 2 | 2.949  | P62807 |
| H2B1C_HUMAN |  | R.KESYSVYVYK.V | 2 | 2.4358 | P62807 |
| H2B1C_HUMAN |  | R.KESYSVYVYK.V | 2 | 3.2853 | P62807 |
| H2B1C_HUMAN |  | R.KESYSVYVYK.V | 2 | 2.9715 | P62807 |
| H2B1C_HUMAN |  | R.KESYSVYVYK.V | 2 | 3.1679 | P62807 |

***Histone H2B type 2-C - Homo sapiens (Human)***

|             |  |                      |   |        |        |
|-------------|--|----------------------|---|--------|--------|
| H2B2C_HUMAN |  | K.AMGIM*NSFLNDIFER.I | 2 | 2.3462 | Q6DN03 |
| H2B2C_HUMAN |  | K.AM*GIMNSFLNDIFER.I | 2 | 2.6029 | Q6DN03 |
| H2B2C_HUMAN |  | K.AM*GIMNSFLNDIFER.I | 2 | 2.6266 | Q6DN03 |

| <i>Protein</i> | <i>Reference</i> | <i>Peptide sequence</i> | <i>Charge</i> | <i>XCorr*</i> | <i>Accession**</i> |
|----------------|------------------|-------------------------|---------------|---------------|--------------------|
| H2B2C_HUMAN    |                  | K.AM*GIMNSFLNDIFER.I    | 2             | 2.3807        | Q6DN03             |
| H2B2C_HUMAN    |                  | K.AMGIMNSFLNDIFER.I     | 2             | 3.6176        | Q6DN03             |
| H2B2C_HUMAN    |                  | K.AM*GIMNSFLNDIFER.I    | 2             | 2.3895        | Q6DN03             |
| H2B2C_HUMAN    |                  | K.AMGIMNSFLNDIFER.I     | 2             | 3.3873        | Q6DN03             |
| H2B2C_HUMAN    |                  | K.AM*GIM*NSFLNDIFER.I   | 2             | 2.8391        | Q6DN03             |
| H2B2C_HUMAN    |                  | K.AM*GIMNSFLNDIFER.I    | 2             | 2.5185        | Q6DN03             |

***Histone H3.It - Homo sapiens (Human)***

|            |  |                 |   |        |        |
|------------|--|-----------------|---|--------|--------|
| H31T_HUMAN |  | R.EIAQDFKTDLR.F | 2 | 2.4713 | Q16695 |
| H31T_HUMAN |  | K.STELLIR.K     | 2 | 2.4172 | Q16695 |
| H31T_HUMAN |  | R.EIAQDFK.T     | 1 | 2.0046 | Q16695 |
| H31T_HUMAN |  | R.EIAQDFKTDLR.F | 2 | 2.3565 | Q16695 |
| H31T_HUMAN |  | R.EIAQDFKTDLR.F | 2 | 2.7251 | Q16695 |

***Histone H4 - Homo sapiens (Human)***

|          |  |                            |   |        |        |
|----------|--|----------------------------|---|--------|--------|
| H4_HUMAN |  | R.DAVTYTEHAK.R             | 2 | 3.1602 | P62805 |
| H4_HUMAN |  | R.DNIQGITKPAIR.R           | 2 | 3.3861 | P62805 |
| H4_HUMAN |  | R.DNIQGITKPAIR.R           | 2 | 2.9938 | P62805 |
| H4_HUMAN |  | R.ISGLIYEETR.G             | 2 | 2.9208 | P62805 |
| H4_HUMAN |  | K.TVTAMDVVYALKR.Q          | 2 | 2.8223 | P62805 |
| H4_HUMAN |  | K.TVTAMDVVYALK.R           | 2 | 3.2857 | P62805 |
| H4_HUMAN |  | K.TVTAMDVVYALK.R           | 2 | 2.585  | P62805 |
| H4_HUMAN |  | K.VFLENVIRDAVTYTEHAK.R     | 3 | 4.9742 | P62805 |
| H4_HUMAN |  | R.DAVTYTEHAK.R             | 2 | 3.1041 | P62805 |
| H4_HUMAN |  | R.DNIQGITKPAIR.R           | 2 | 3.4877 | P62805 |
| H4_HUMAN |  | R.DNIQGITKPAIR.R           | 2 | 3.1422 | P62805 |
| H4_HUMAN |  | R.ISGLIYEETR.G             | 2 | 3.1062 | P62805 |
| H4_HUMAN |  | R.KTVTAMDVVYALKR.Q         | 3 | 5.1125 | P62805 |
| H4_HUMAN |  | K.TVTAMDVVYALKR.Q          | 2 | 2.987  | P62805 |
| H4_HUMAN |  | K.TVTAMDVVYALKR.Q          | 2 | 3.1027 | P62805 |
| H4_HUMAN |  | K.TVTAMDVVYALK.R           | 2 | 2.4941 | P62805 |
| H4_HUMAN |  | R.ISGLIYEETRGLVKVFLENVIR.D | 3 | 5.0535 | P62805 |
| H4_HUMAN |  | R.DAVTYTEHAK.R             | 2 | 3.4207 | P62805 |
| H4_HUMAN |  | R.DAVTYTEHAK.R             | 2 | 2.5897 | P62805 |
| H4_HUMAN |  | R.DNIQGITKPAIR.R           | 2 | 3.4872 | P62805 |
| H4_HUMAN |  | R.DNIQGITKPAIR.R           | 2 | 3.1633 | P62805 |
| H4_HUMAN |  | R.ISGLIYEETR.G             | 2 | 3.0256 | P62805 |
| H4_HUMAN |  | K.VFLENVIR.D               | 2 | 2.3686 | P62805 |

| <i>Protein</i> | <i>Reference</i> | <i>Peptide sequence</i>   | <i>Charge</i> | <i>XCorr*</i> | <i>Accession**</i> |
|----------------|------------------|---------------------------|---------------|---------------|--------------------|
| H4_HUMAN       |                  | K.TVTAMDVVYALK.R          | 2             | 2.7565        | P62805             |
| H4_HUMAN       |                  | R.DAVTYTEHAK.R            | 2             | 3.1298        | P62805             |
| H4_HUMAN       |                  | R.DNIQGITKPAIR.R          | 2             | 3.3804        | P62805             |
| H4_HUMAN       |                  | R.ISGLIYEETR.G            | 2             | 3.1359        | P62805             |
| H4_HUMAN       |                  | K.TVTAM*DVVYALK.R         | 2             | 2.3458        | P62805             |
| H4_HUMAN       |                  | K.TVTAMDVVYALKR.Q         | 2             | 2.8216        | P62805             |
| H4_HUMAN       |                  | K.TVTAMDVVYALKR.Q         | 2             | 3.1439        | P62805             |
| H4_HUMAN       |                  | K.TVTAMDVVYALK.R          | 2             | 2.45          | P62805             |
| H4_HUMAN       |                  | R.ISGLIYEETRGLK.V         | 2             | 3.2378        | P62805             |
| H4_HUMAN       |                  | R.ISGLIYEETRGLK.V         | 2             | 2.3915        | P62805             |
| H4_HUMAN       |                  | R.ISGLIYEETRGLKVFLENVIR.D | 3             | 4.8495        | P62805             |

***HLA class I histocompatibility antigen, A-1 alpha chain precursor - Homo sapiens (Human)***

|            |  |                    |   |        |        |
|------------|--|--------------------|---|--------|--------|
| 1A01_HUMAN |  | K.WAAVVVPSGEEQR.Y  | 2 | 2.3943 | P30443 |
| 1A01_HUMAN |  | R.FIAVGYVDDTQFVR.F | 2 | 3.418  | P30443 |
| 1A01_HUMAN |  | R.FIAVGYVDDTQFVR.F | 2 | 2.5477 | P30443 |
| 1A01_HUMAN |  | R.FIAVGYVDDTQFVR.F | 2 | 3.4356 | P30443 |
| 1A01_HUMAN |  | R.FIAVGYVDDTQFVR.F | 2 | 2.7491 | P30443 |
| 1A01_HUMAN |  | R.FIAVGYVDDTQFVR.F | 2 | 3.2646 | P30443 |
| 1A01_HUMAN |  | R.FIAVGYVDDTQFVR.F | 2 | 2.7254 | P30443 |
| 1A01_HUMAN |  | R.FIAVGYVDDTQFVR.F | 2 | 2.4514 | P30443 |

***HLA class I histocompatibility antigen, A-2 alpha chain precursor - Homo sapiens (Human)***

|            |  |              |   |        |        |
|------------|--|--------------|---|--------|--------|
| 1A02_HUMAN |  | R.FSDAASQR.M | 2 | 2.3133 | P01892 |
|------------|--|--------------|---|--------|--------|

***HLA class I histocompatibility antigen, A-25 alpha chain precursor - Homo sapiens (Human)***

|            |  |                   |   |        |        |
|------------|--|-------------------|---|--------|--------|
| 1A25_HUMAN |  | R.APWIEQEGPEYWR.N | 2 | 3.4924 | P18462 |
| 1A25_HUMAN |  | R.APWIEQEGPEYWR.N | 2 | 3.7141 | P18462 |
| 1A25_HUMAN |  | R.APWIEQEGPEYWR.N | 2 | 3.6917 | P18462 |
| 1A25_HUMAN |  | R.APWIEQEGPEYWR.N | 2 | 2.354  | P18462 |
| 1A25_HUMAN |  | R.APWIEQEGPEYWR.N | 2 | 3.0113 | P18462 |

***HLA class I histocompatibility antigen, B-7 alpha chain precursor - Homo sapiens (Human)***

|            |  |              |   |        |        |
|------------|--|--------------|---|--------|--------|
| 1B07_HUMAN |  | R.FSDAASPR.E | 2 | 2.5507 | P01889 |
|------------|--|--------------|---|--------|--------|

***HLA class II histocompatibility antigen gamma chain - Homo sapiens (Human)***

|            |  |                    |   |        |        |
|------------|--|--------------------|---|--------|--------|
| HG2A_HUMAN |  | K.LTVTSQNLQLENLR.M | 2 | 2.5326 | P04233 |
| HG2A_HUMAN |  | K.LTVTSQNLQLENLR.M | 2 | 3.5097 | P04233 |
| HG2A_HUMAN |  | K.LTVTSQNLQLENLR.M | 2 | 3.1517 | P04233 |

***HLA class II histocompatibility antigen, DR alpha chain precursor - Homo sapiens (Human)***

| <i>Protein</i>                                                                                            | <i>Reference</i> | <i>Peptide sequence</i>  | <i>Charge</i> | <i>XCorr*</i> | <i>Accession**</i> |
|-----------------------------------------------------------------------------------------------------------|------------------|--------------------------|---------------|---------------|--------------------|
| 2DRA_HUMAN                                                                                                |                  | R.FASFEAQQGALANIAVDK.A   | 2             | 4.0398        | P01903             |
| 2DRA_HUMAN                                                                                                |                  | R.FASFEAQQGALANIAVDK.A   | 2             | 4.1845        | P01903             |
| 2DRA_HUMAN                                                                                                |                  | R.FASFEAQQGALANIAVDK.A   | 2             | 3.8184        | P01903             |
| 2DRA_HUMAN                                                                                                |                  | R.FASFEAQQGALANIAVDK.A   | 2             | 3.8187        | P01903             |
| 2DRA_HUMAN                                                                                                |                  | R.NGKPVTTGVSETVFLPR.E    | 2             | 3.2359        | P01903             |
| 2DRA_HUMAN                                                                                                |                  | R.NGKPVTTGVSETVFLPR.E    | 2             | 2.6158        | P01903             |
| 2DRA_HUMAN                                                                                                |                  | R.FASFEAQQGALANIAVDK.A   | 2             | 3.7092        | P01903             |
| 2DRA_HUMAN                                                                                                |                  | R.FASFEAQQGALANIAVDK.A   | 2             | 5.6319        | P01903             |
| 2DRA_HUMAN                                                                                                |                  | R.FASFEAQQGALANIAVDK.A   | 2             | 2.3309        | P01903             |
| <b><i>HLA class II histocompatibility antigen, DRB1-1 beta chain precursor - Homo sapiens (Human)</i></b> |                  |                          |               |               |                    |
| 2B11_HUMAN                                                                                                |                  | R.FDSVDGEYR.A            | 2             | 3.2815        | P04229             |
| 2B11_HUMAN                                                                                                |                  | R.FDSVDGEYR.A            | 2             | 2.5855        | P04229             |
| 2B11_HUMAN                                                                                                |                  | R.FDSVDGEYR.A            | 2             | 2.3673        | P04229             |
| 2B11_HUMAN                                                                                                |                  | R.HNYGVGESFTVQR.R        | 2             | 2.9717        | P04229             |
| <b><i>HLA class II histocompatibility antigen, DRB1-8 beta chain precursor - Homo sapiens (Human)</i></b> |                  |                          |               |               |                    |
| 2B18_HUMAN                                                                                                |                  | R.YFYNQEEYVR.F           | 2             | 2.6442        | Q30134             |
| 2B18_HUMAN                                                                                                |                  | R.FLDRYFYNQEEYVR.F       | 2             | 3.4517        | Q30134             |
| 2B18_HUMAN                                                                                                |                  | R.FLDRYFYNQEEYVR.F       | 2             | 2.4914        | Q30134             |
| 2B18_HUMAN                                                                                                |                  | R.YFYNQEEYVR.F           | 2             | 2.6096        | Q30134             |
| 2B18_HUMAN                                                                                                |                  | R.FLDRYFYNQEEYVR.F       | 2             | 2.4321        | Q30134             |
| <b><i>HLA class II histocompatibility antigen, DR-W53 beta chain precursor - Homo sapiens (Human)</i></b> |                  |                          |               |               |                    |
| HB2K_HUMAN                                                                                                |                  | R.YIYNQEEYAR.Y           | 2             | 2.7151        | P13762             |
| HB2K_HUMAN                                                                                                |                  | R.YIYNQEEYAR.Y           | 2             | 2.5839        | P13762             |
| HB2K_HUMAN                                                                                                |                  | R.YIYNQEEYAR.Y           | 2             | 2.5283        | P13762             |
| HB2K_HUMAN                                                                                                |                  | R.YIYNQEEYAR.Y           | 2             | 2.6057        | P13762             |
| <b><i>IGHM protein - Homo sapiens (Human)</i></b>                                                         |                  |                          |               |               |                    |
| Q6GMX5_HUMAN                                                                                              |                  | K.QVGSVTTDQVQAEAK.E      | 2             | 3.1113        | Q6GMX5             |
| <b><i>Immediate early response 3-interacting protein 1 - Homo sapiens (Human)</i></b>                     |                  |                          |               |               |                    |
| IR3IP_HUMAN                                                                                               |                  | K.NIGWGTDQGIGGFGEPEGIK.S | 2             | 3.2637        | Q9Y5U9             |
| <b><i>Inhibitor of nuclear factor kappa-B kinase subunit beta - Homo sapiens (Human)</i></b>              |                  |                          |               |               |                    |
| IKKB_HUMAN                                                                                                |                  | R.EGAILTLLSDIASALR.Y     | 2             | 2.5131        | O14920             |
| <b><i>Integrin alpha-IIb precursor - Homo sapiens (Human)</i></b>                                         |                  |                          |               |               |                    |
| ITA2B_HUMAN                                                                                               |                  | R.NRPPLEEDDEEGE.-        | 2             | 2.8583        | P08514             |
| ITA2B_HUMAN                                                                                               |                  | R.ALSNVEGFER.L           | 2             | 2.3612        | P08514             |
| ITA2B_HUMAN                                                                                               |                  | R.GEAQVWTQLLR.A          | 2             | 2.7571        | P08514             |



| <i>Protein</i>                                                           | <i>Reference</i> | <i>Peptide sequence</i>    | <i>Charge</i> | <i>XCorr*</i> | <i>Accession**</i> |
|--------------------------------------------------------------------------|------------------|----------------------------|---------------|---------------|--------------------|
| ITA2B_HUMAN                                                              |                  | R.SRPSQVLDSPFPTGSAFGFSLR.G | 3             | 3.8215        | P08514             |
| ITA2B_HUMAN                                                              |                  | R.ALSNVEGFER.L             | 2             | 2.4009        | P08514             |
| ITA2B_HUMAN                                                              |                  | R.GEAQVWTQLLR.A            | 2             | 2.7388        | P08514             |
| ITA2B_HUMAN                                                              |                  | R.GEAQVWTQLLR.A            | 2             | 2.7835        | P08514             |
| ITA2B_HUMAN                                                              |                  | R.NRPPEEDDEEGE.-           | 2             | 2.671         | P08514             |
| ITA2B_HUMAN                                                              |                  | R.ALSNVEGFER.L             | 2             | 2.4183        | P08514             |
| ITA2B_HUMAN                                                              |                  | R.GEAQVWTQLLR.A            | 2             | 2.5278        | P08514             |
| ITA2B_HUMAN                                                              |                  | R.ALSNVEGFER.L             | 2             | 2.3724        | P08514             |
| ITA2B_HUMAN                                                              |                  | R.NRPPEEDDEEGE.-           | 2             | 2.6832        | P08514             |
| <b><i>Integrin alpha-M precursor - Homo sapiens (Human)</i></b>          |                  |                            |               |               |                    |
| ITAM_HUMAN                                                               |                  | R.VVVGAPQEIVAANQR.G        | 2             | 3.4419        | P11215             |
| ITAM_HUMAN                                                               |                  | R.GFGQSVVQLQGSR.V          | 2             | 2.8158        | P11215             |
| ITAM_HUMAN                                                               |                  | R.LFTALFPFEK.N             | 2             | 2.3217        | P11215             |
| ITAM_HUMAN                                                               |                  | R.VMQHQYQVSNLGQR.S         | 3             | 3.7874        | P11215             |
| ITAM_HUMAN                                                               |                  | R.GFGQSVVQLQGSR.V          | 2             | 3.2979        | P11215             |
| ITAM_HUMAN                                                               |                  | R.VMQHQYQVSNLGQR.S         | 3             | 4.3306        | P11215             |
| ITAM_HUMAN                                                               |                  | R.VVVGAPQEIVAANQR.G        | 2             | 3.2634        | P11215             |
| ITAM_HUMAN                                                               |                  | R.LFTALFPFEK.N             | 2             | 2.3074        | P11215             |
| ITAM_HUMAN                                                               |                  | R.LFTALFPFEK.N             | 2             | 2.49          | P11215             |
| ITAM_HUMAN                                                               |                  | R.VMQHQYQVSNLGQR.S         | 3             | 4.3896        | P11215             |
| ITAM_HUMAN                                                               |                  | R.GFGQSVVQLQGSR.V          | 2             | 3.1732        | P11215             |
| ITAM_HUMAN                                                               |                  | R.MKEFVSTVMEQLKK.S         | 3             | 3.8276        | P11215             |
| ITAM_HUMAN                                                               |                  | R.VMQHQYQVSNLGQR.S         | 2             | 3.8065        | P11215             |
| ITAM_HUMAN                                                               |                  | R.VMQHQYQVSNLGQR.S         | 2             | 3.2777        | P11215             |
| ITAM_HUMAN                                                               |                  | R.QYKDMMSEGGPPGAEPQ.-      | 2             | 2.7639        | P11215             |
| ITAM_HUMAN                                                               |                  | R.VVVGAPQEIVAANQR.G        | 2             | 2.6602        | P11215             |
| ITAM_HUMAN                                                               |                  | K.YAVYMVVTSHGVSTK.Y        | 2             | 2.8447        | P11215             |
| <b><i>Integrin beta chain, beta 2 variant - Homo sapiens (Human)</i></b> |                  |                            |               |               |                    |
| Q59H50_HUMAN                                                             |                  | K.SAVGELSESSNVVHLIK.N      | 2             | 4.0551        | Q59H50             |
| Q59H50_HUMAN                                                             |                  | K.SAVGELSESSNVVHLIK.N      | 2             | 3.7355        | Q59H50             |
| Q59H50_HUMAN                                                             |                  | K.SAVGELSESSNVVHLIK.N      | 2             | 3.5128        | Q59H50             |
| <b><i>Integrin beta-2 precursor - Homo sapiens (Human)</i></b>           |                  |                            |               |               |                    |
| ITB2_HUMAN                                                               |                  | R.ALNEITESGR.I             | 2             | 2.8005        | P05107             |
| ITB2_HUMAN                                                               |                  | R.VFLDHNALPDTLK.V          | 2             | 3.761         | P05107             |
| ITB2_HUMAN                                                               |                  | K.VTATEC#IQEQSFVIR.A       | 2             | 3.3421        | P05107             |

| <i>Protein</i>                                                                  | <i>Reference</i> | <i>Peptide sequence</i>   | <i>Charge</i> | <i>XCorr*</i> | <i>Accession**</i> |
|---------------------------------------------------------------------------------|------------------|---------------------------|---------------|---------------|--------------------|
| ITB2_HUMAN                                                                      |                  | K.LAENNIQPIFAVTSR.M       | 2             | 3.3084        | P05107             |
| ITB2_HUMAN                                                                      |                  | K.LAENNIQPIFAVTSR.M       | 2             | 2.3064        | P05107             |
| ITB2_HUMAN                                                                      |                  | R.LLVFATDDGFHFAGDGK.L     | 2             | 3.1178        | P05107             |
| ITB2_HUMAN                                                                      |                  | R.YNGQVC#GGPGR.G          | 2             | 2.6449        | P05107             |
| ITB2_HUMAN                                                                      |                  | R.ALNEITESGR.I            | 2             | 2.696         | P05107             |
| ITB2_HUMAN                                                                      |                  | K.LGAILTPNDGR.C           | 2             | 2.5318        | P05107             |
| ITB2_HUMAN                                                                      |                  | R.VFLDHNALPDTLK.V         | 2             | 3.7362        | P05107             |
| ITB2_HUMAN                                                                      |                  | K.LAENNIQPIFAVTSR.M       | 2             | 3.0422        | P05107             |
| ITB2_HUMAN                                                                      |                  | K.LAENNIQPIFAVTSR.M       | 2             | 3.7888        | P05107             |
| ITB2_HUMAN                                                                      |                  | R.LLVFATDDGFHFAGDGK.L     | 2             | 3.6021        | P05107             |
| ITB2_HUMAN                                                                      |                  | K.GYPIDLYYLDLSYSMLDDL.R.N | 2             | 3.16          | P05107             |
| ITB2_HUMAN                                                                      |                  | R.YNGQVC#GGPGR.G          | 2             | 2.7069        | P05107             |
| ITB2_HUMAN                                                                      |                  | R.ALNEITESGR.I            | 2             | 2.8597        | P05107             |
| ITB2_HUMAN                                                                      |                  | K.LGGDLLR.A               | 2             | 2.3238        | P05107             |
| ITB2_HUMAN                                                                      |                  | K.VTATEC#IQEQSFVIR.A      | 2             | 2.5082        | P05107             |
| ITB2_HUMAN                                                                      |                  | K.LAENNIQPIFAVTSR.M       | 2             | 3.1983        | P05107             |
| ITB2_HUMAN                                                                      |                  | K.LAENNIQPIFAVTSR.M       | 2             | 3.0969        | P05107             |
| ITB2_HUMAN                                                                      |                  | R.LLVFATDDGFHFAGDGK.L     | 2             | 2.4688        | P05107             |
| ITB2_HUMAN                                                                      |                  | K.GYPIDLYYLDLSYSMLDDL.R.N | 2             | 3.9499        | P05107             |
| ITB2_HUMAN                                                                      |                  | R.YNGQVC#GGPGR.G          | 2             | 2.5124        | P05107             |
| ITB2_HUMAN                                                                      |                  | R.TTEGC#LNPR.R            | 2             | 2.772         | P05107             |
| ITB2_HUMAN                                                                      |                  | R.C#HPGFEGSAC#QC#ER.T     | 3             | 4.1009        | P05107             |
| ITB2_HUMAN                                                                      |                  | R.ALNEITESGR.I            | 2             | 2.9642        | P05107             |
| ITB2_HUMAN                                                                      |                  | R.SNEFDYPSVQLAHLK.L       | 2             | 3.3725        | P05107             |
| ITB2_HUMAN                                                                      |                  | R.VFLDHNALPDTLK.V         | 2             | 2.4559        | P05107             |
| ITB2_HUMAN                                                                      |                  | K.VTATEC#IQEQSFVIR.A      | 2             | 3.1386        | P05107             |
| ITB2_HUMAN                                                                      |                  | R.LLVFATDDGFHFAGDGK.L     | 2             | 3.0177        | P05107             |
| <b><i>Integrin beta-3 precursor - Homo sapiens (Human)</i></b>                  |                  |                           |               |               |                    |
| ITB3_HUMAN                                                                      |                  | K.GSGDSSQVTQVSPQR.I       | 2             | 3.7417        | P05106             |
| ITB3_HUMAN                                                                      |                  | K.HVLTLTDQVTR.F           | 2             | 2.7605        | P05106             |
| ITB3_HUMAN                                                                      |                  | K.GSGDSSQVTQVSPQR.I       | 2             | 3.1899        | P05106             |
| ITB3_HUMAN                                                                      |                  | K.GSGDSSQVTQVSPQR.I       | 2             | 3.4351        | P05106             |
| <b><i>Interferon-induced transmembrane protein 1 - Homo sapiens (Human)</i></b> |                  |                           |               |               |                    |
| IFM1_HUMAN                                                                      |                  | K.MVGDVTGAQAYASTAK.C      | 2             | 3.7608        | P13164             |
| IFM1_HUMAN                                                                      |                  | K.MVGDVTGAQAYASTAK.C      | 2             | 3.8018        | P13164             |
| IFM1_HUMAN                                                                      |                  | K.MVGDVTGAQAYASTAK.C      | 2             | 3.8894        | P13164             |

| <i>Protein</i>                                                                     | <i>Reference</i> | <i>Peptide sequence</i> | <i>Charge</i> | <i>XCorr*</i> | <i>Accession**</i> |
|------------------------------------------------------------------------------------|------------------|-------------------------|---------------|---------------|--------------------|
| <b><i>IQ motif and Sec7 domain-containing protein 3 - Homo sapiens (Human)</i></b> |                  |                         |               |               |                    |
|                                                                                    | IQEC3_HUMAN      | R.QMIGEFLGNSKKQFNR.D    | 2             | 2.3412        | Q9UAPP2            |
| <b><i>Jagged-1 precursor - Homo sapiens (Human)</i></b>                            |                  |                         |               |               |                    |
|                                                                                    | JAG1_HUMAN       | K.IIDLVSKR.D            | 2             | 2.3394        | P78504             |
| <b><i>Lamin-B receptor - Homo sapiens (Human)</i></b>                              |                  |                         |               |               |                    |
|                                                                                    | LBR_HUMAN        | K.VVEGTPLIDGR.R         | 2             | 2.4417        | Q14739             |
|                                                                                    | LBR_HUMAN        | K.VVEGTPLIDGR.R         | 2             | 2.4716        | Q14739             |
|                                                                                    | LBR_HUMAN        | K.VVEGTPLIDGR.R         | 2             | 2.4056        | Q14739             |
|                                                                                    | LBR_HUMAN        | R.NDLSPASSGNAVYDFFIGR.E | 2             | 3.2656        | Q14739             |
|                                                                                    | LBR_HUMAN        | K.VVEGTPLIDGR.R         | 2             | 2.3457        | Q14739             |
| <b><i>Lamin-B1 - Homo sapiens (Human)</i></b>                                      |                  |                         |               |               |                    |
|                                                                                    | LMNB1_HUMAN      | R.LSSEMNTSTVNSAR.E      | 2             | 2.8377        | P20700             |
|                                                                                    | LMNB1_HUMAN      | R.LSSEMNTSTVNSAR.E      | 2             | 3.3151        | P20700             |
| <b><i>Leukocyte common antigen precursor - Homo sapiens (Human)</i></b>            |                  |                         |               |               |                    |
|                                                                                    | CD45_HUMAN       | R.SC#NLDEQQELVER.D      | 2             | 4.3277        | P08575             |
|                                                                                    | CD45_HUMAN       | R.LFLAEFQSIPR.V         | 2             | 2.6115        | P08575             |
|                                                                                    | CD45_HUMAN       | R.SC#NLDEQQELVER.D      | 2             | 4.9279        | P08575             |
|                                                                                    | CD45_HUMAN       | R.LFLAEFQSIPR.V         | 2             | 2.8764        | P08575             |
|                                                                                    | CD45_HUMAN       | R.SC#NLDEQQELVER.D      | 2             | 4.7381        | P08575             |
|                                                                                    | CD45_HUMAN       | R.LFLAEFQSIPR.V         | 2             | 3.0768        | P08575             |
|                                                                                    | CD45_HUMAN       | R.SC#NLDEQQELVER.D      | 2             | 3.8775        | P08575             |
|                                                                                    | CD45_HUMAN       | R.VKDLQYSTDYTFK.A       | 2             | 3.197         | P08575             |
| <b><i>Leukocyte elastase inhibitor - Homo sapiens (Human)</i></b>                  |                  |                         |               |               |                    |
|                                                                                    | ILEU_HUMAN       | R.LGVQDLFNSSK.A         | 2             | 3.2356        | P30740             |
|                                                                                    | ILEU_HUMAN       | K.LVLVNAIFYK.G          | 2             | 2.6079        | P30740             |
|                                                                                    | ILEU_HUMAN       | K.LVLVNAIFYK.G          | 2             | 2.8507        | P30740             |
|                                                                                    | ILEU_HUMAN       | R.FKLEESYTLNSDLAR.L     | 2             | 2.6394        | P30740             |
|                                                                                    | ILEU_HUMAN       | K.IPELLASGMVDNMTK.L     | 2             | 3.5882        | P30740             |
| <b><i>Leukocyte elastase precursor - Homo sapiens (Human)</i></b>                  |                  |                         |               |               |                    |
|                                                                                    | ELNE_HUMAN       | R.VVLGAHNLSR.R          | 2             | 2.5746        | P08246             |
|                                                                                    | ELNE_HUMAN       | R.VVLGAHNLSR.R          | 2             | 2.5131        | P08246             |
|                                                                                    | ELNE_HUMAN       | R.LGNGVQC#LAMGWLLGR.N   | 2             | 2.6474        | P08246             |
|                                                                                    | ELNE_HUMAN       | R.LGNGVQC#LAMGWLLGR.N   | 2             | 2.5082        | P08246             |
|                                                                                    | ELNE_HUMAN       | R.LGNGVQC#LAMGWLLGR.N   | 2             | 3.1195        | P08246             |

| <i>Protein</i>                                                                                          | <i>Reference</i> | <i>Peptide sequence</i>           | <i>Charge</i> | <i>XCorr*</i> | <i>Accession**</i> |
|---------------------------------------------------------------------------------------------------------|------------------|-----------------------------------|---------------|---------------|--------------------|
| <b><i>Leukocyte immunoglobulin-like receptor subfamily B member 1 precursor - Homo sapiens (Hu)</i></b> |                  |                                   |               |               |                    |
| LIRB1_HUMAN                                                                                             |                  | R.KADFQHPAGAVGPEPTDR.G            | 3             | 4.0669        | Q8NHL6             |
| LIRB1_HUMAN                                                                                             |                  | R.SSPAADAQEENLYAAVK.H             | 2             | 3.4819        | Q8NHL6             |
| <b><i>Leukosialin precursor - Homo sapiens (Human)</i></b>                                              |                  |                                   |               |               |                    |
| LEUK_HUMAN                                                                                              |                  | R.TGALVLSR.G                      | 2             | 2.6072        | P16150             |
| <b><i>Lysozyme C precursor - Homo sapiens (Human)</i></b>                                               |                  |                                   |               |               |                    |
| LYSC_HUMAN                                                                                              |                  | R.ATNYNAGDR.S                     | 2             | 2.398         | P61626             |
| LYSC_HUMAN                                                                                              |                  | K.RLGMDGYR.G                      | 2             | 2.4653        | P61626             |
| LYSC_HUMAN                                                                                              |                  | R.STDYGIFQINSR.Y                  | 1             | 2.3904        | P61626             |
| LYSC_HUMAN                                                                                              |                  | R.GISLANWM*C#LAK.W                | 2             | 2.391         | P61626             |
| LYSC_HUMAN                                                                                              |                  | R.GISLANWM*C#LAK.W                | 2             | 3.11          | P61626             |
| LYSC_HUMAN                                                                                              |                  | R.GISLANWMC#LAK.W                 | 2             | 3.3342        | P61626             |
| LYSC_HUMAN                                                                                              |                  | R.GISLANWMC#LAK.W                 | 2             | 3.6745        | P61626             |
| LYSC_HUMAN                                                                                              |                  | R.GISLANWMC#LAK.W                 | 2             | 3.305         | P61626             |
| LYSC_HUMAN                                                                                              |                  | R.ATNYNAGDR.S                     | 2             | 2.6106        | P61626             |
| LYSC_HUMAN                                                                                              |                  | K.RLGMDGYR.G                      | 2             | 2.4501        | P61626             |
| LYSC_HUMAN                                                                                              |                  | R.STDYGIFQINSR.Y                  | 2             | 2.9349        | P61626             |
| LYSC_HUMAN                                                                                              |                  | R.STDYGIFQINSR.Y                  | 1             | 2.6812        | P61626             |
| LYSC_HUMAN                                                                                              |                  | R.GISLANWM*C#LAK.W                | 2             | 2.9514        | P61626             |
| LYSC_HUMAN                                                                                              |                  | R.GISLANWMC#LAK.W                 | 2             | 2.8318        | P61626             |
| LYSC_HUMAN                                                                                              |                  | R.GISLANWMC#LAK.W                 | 2             | 3.3712        | P61626             |
| LYSC_HUMAN                                                                                              |                  | R.GISLANWMC#LAK.W                 | 1             | 2.1476        | P61626             |
| LYSC_HUMAN                                                                                              |                  | R.ATNYNAGDR.S                     | 2             | 2.4955        | P61626             |
| LYSC_HUMAN                                                                                              |                  | R.ATNYNAGDR.S                     | 2             | 2.3713        | P61626             |
| LYSC_HUMAN                                                                                              |                  | R.ATNYNAGDR.S                     | 2             | 2.6471        | P61626             |
| LYSC_HUMAN                                                                                              |                  | K.RLGMDGYR.G                      | 2             | 2.7299        | P61626             |
| LYSC_HUMAN                                                                                              |                  | R.STDYGIFQINSR.Y                  | 2             | 3.8134        | P61626             |
| LYSC_HUMAN                                                                                              |                  | K.TPGAVNACHLSCSALLQDNIADAVAC#AK.R | 3             | 4.3733        | P61626             |
| LYSC_HUMAN                                                                                              |                  | R.GISLANWM*C#LAK.W                | 2             | 2.4242        | P61626             |
| LYSC_HUMAN                                                                                              |                  | R.GISLANWMC#LAK.W                 | 2             | 2.7271        | P61626             |
| LYSC_HUMAN                                                                                              |                  | R.GISLANWMC#LAK.W                 | 1             | 2.1776        | P61626             |
| LYSC_HUMAN                                                                                              |                  | R.VVRDPQGIR.A                     | 2             | 2.5284        | P61626             |
| LYSC_HUMAN                                                                                              |                  | K.RLGMDGYR.G                      | 2             | 2.7245        | P61626             |
| LYSC_HUMAN                                                                                              |                  | R.STDYGIFQINSR.Y                  | 2             | 3.9565        | P61626             |
| LYSC_HUMAN                                                                                              |                  | R.STDYGIFQINSR.Y                  | 2             | 4.1827        | P61626             |

| <i>Protein</i>                                                                             | <i>Reference</i> | <i>Peptide sequence</i>              | <i>Charge</i> | <i>XCorr*</i> | <i>Accession**</i> |
|--------------------------------------------------------------------------------------------|------------------|--------------------------------------|---------------|---------------|--------------------|
| LYSC_HUMAN                                                                                 |                  | R.STDYGIFQINSR.Y                     | 2             | 2.9782        | P61626             |
| LYSC_HUMAN                                                                                 |                  | R.GISLANWM*C#LAK.W                   | 2             | 2.5283        | P61626             |
| LYSC_HUMAN                                                                                 |                  | R.GISLANWM*C#LAK.W                   | 2             | 2.8494        | P61626             |
| LYSC_HUMAN                                                                                 |                  | R.GISLANWM*C#LAK.W                   | 2             | 3.2983        | P61626             |
| LYSC_HUMAN                                                                                 |                  | R.GISLANWMC#LAK.W                    | 2             | 2.5992        | P61626             |
| LYSC_HUMAN                                                                                 |                  | R.STDYGIFQINSR.Y                     | 1             | 3.026         | P61626             |
| LYSC_HUMAN                                                                                 |                  | R.STDYGIFQINSR.Y                     | 1             | 2.893         | P61626             |
| LYSC_HUMAN                                                                                 |                  | K.TPGAVNAC#HLSC#SALLQDNIADAVAC#AK.R  | 2             | 4.0675        | P61626             |
| <b><i>Mannose-P-dolichol utilization defect 1 protein - Homo sapiens (Human)</i></b>       |                  |                                      |               |               |                    |
| MPU1_HUMAN                                                                                 |                  | K.GLGLGIVAGSLLVK.L                   | 2             | 2.9635        | O75352             |
| MPU1_HUMAN                                                                                 |                  | K.GLGLGIVAGSLLVK.L                   | 2             | 2.9374        | O75352             |
| MPU1_HUMAN                                                                                 |                  | K.GLGLGIVAGSLLVK.L                   | 2             | 2.7362        | O75352             |
| <b><i>Mannosyl-oligosaccharide glucosidase - Homo sapiens (Human)</i></b>                  |                  |                                      |               |               |                    |
| GCS1_HUMAN                                                                                 |                  | R.LGPLLDILADSR.H                     | 2             | 2.6688        | Q13724             |
| GCS1_HUMAN                                                                                 |                  | R.VTVEPQDSGTSALPLVSLFFYVVDGKEVLLPEVG | 3             | 3.864         | Q13724             |
| <b><i>Mast cell-expressed membrane protein 1 - Homo sapiens (Human)</i></b>                |                  |                                      |               |               |                    |
| MCEM1_HUMAN                                                                                |                  | R.SKIDRLETTLAGIK.N                   | 2             | 3.1752        | Q8IX19             |
| MCEM1_HUMAN                                                                                |                  | R.GWDSVQQSITM*VR.S                   | 2             | 2.8646        | Q8IX19             |
| MCEM1_HUMAN                                                                                |                  | R.GWDSVQQSITMVR.S                    | 2             | 2.8342        | Q8IX19             |
| MCEM1_HUMAN                                                                                |                  | R.GWDSVQQSITMVR.S                    | 2             | 2.715         | Q8IX19             |
| MCEM1_HUMAN                                                                                |                  | R.GWDSVQQSITMVR.S                    | 2             | 3.1165        | Q8IX19             |
| <b><i>MBC3205 - Homo sapiens (Human)</i></b>                                               |                  |                                      |               |               |                    |
| Q6UW68_HUMAN                                                                               |                  | R.GLGGEVPGSHQGPDPYR.Q                | 2             | 2.8264        | Q6UW68             |
| <b><i>Membrane-associated progesterone receptor component 2 - Homo sapiens (Human)</i></b> |                  |                                      |               |               |                    |
| PGRC2_HUMAN                                                                                |                  | K.FYGPAGPYGIFAGR.D                   | 2             | 2.7791        | O15173             |
| PGRC2_HUMAN                                                                                |                  | K.FYGPAGPYGIFAGR.D                   | 2             | 2.4289        | O15173             |
| PGRC2_HUMAN                                                                                |                  | R.GLGAGAGAGEESPATSLPR.M              | 2             | 3.1144        | O15173             |
| <b><i>Methyltransferase-like protein 7A precursor - Homo sapiens (Human)</i></b>           |                  |                                      |               |               |                    |
| MET7A_HUMAN                                                                                |                  | R.VTC#IDPNPNFEK.F                    | 2             | 2.6695        | Q9H8H3             |
| MET7A_HUMAN                                                                                |                  | K.LSLLEVGC#GTGANFK.F                 | 2             | 3.5125        | Q9H8H3             |
| MET7A_HUMAN                                                                                |                  | R.ELFSNLQEFAGPSGK.L                  | 2             | 3.3522        | Q9H8H3             |
| MET7A_HUMAN                                                                                |                  | R.VTC#IDPNPNFEK.F                    | 2             | 2.9438        | Q9H8H3             |
| MET7A_HUMAN                                                                                |                  | R.VTC#IDPNPNFEK.F                    | 2             | 3.1708        | Q9H8H3             |
| MET7A_HUMAN                                                                                |                  | K.LSLLEVGC#GTGANFK.F                 | 2             | 3.3575        | Q9H8H3             |
| MET7A_HUMAN                                                                                |                  | R.ELFSNLQEFAGPSGK.L                  | 2             | 2.8285        | Q9H8H3             |

| <i>Protein</i>                                                                           | <i>Reference</i> | <i>Peptide sequence</i>       | <i>Charge</i> | <i>XCorr*</i> | <i>Accession**</i> |
|------------------------------------------------------------------------------------------|------------------|-------------------------------|---------------|---------------|--------------------|
| <b><i>Microsomal glutathione S-transferase 1 - Homo sapiens (Human)</i></b>              |                  |                               |               |               |                    |
| MGST1_HUMAN                                                                              |                  | R.KVFANPEDC#VAFGK.G           | 2             | 3.5222        | P10620             |
| MGST1_HUMAN                                                                              |                  | K.MMLMSTATAFYR.L              | 2             | 3.2697        | P10620             |
| MGST1_HUMAN                                                                              |                  | K.MMLMSTATAFYR.L              | 2             | 2.6095        | P10620             |
| MGST1_HUMAN                                                                              |                  | R.KVFANPEDC#VAFGK.G           | 2             | 2.9192        | P10620             |
| MGST1_HUMAN                                                                              |                  | K.MMLMSTATAFYR.L              | 2             | 2.6726        | P10620             |
| MGST1_HUMAN                                                                              |                  | K.VFANPEDC#VAFGK.G            | 2             | 2.5656        | P10620             |
| MGST1_HUMAN                                                                              |                  | K.MMLMSTATAFYR.L              | 2             | 2.5862        | P10620             |
| MGST1_HUMAN                                                                              |                  | K.MMLMSTATAFYR.L              | 2             | 3.1998        | P10620             |
| MGST1_HUMAN                                                                              |                  | R.IYHTIAYLTPLPQPNR.A          | 2             | 3.4624        | P10620             |
| <b><i>Microsomal glutathione S-transferase 3 - Homo sapiens (Human)</i></b>              |                  |                               |               |               |                    |
| MGST3_HUMAN                                                                              |                  | R.VLYAYGYTGEPSKR.S            | 2             | 3.1094        | O14880             |
| MGST3_HUMAN                                                                              |                  | K.YKVEYPIMYSTDPENGHIFNC#IQR.A | 3             | 4.2044        | O14880             |
| MGST3_HUMAN                                                                              |                  | R.IASGLGLAWIVGR.V             | 2             | 3.4553        | O14880             |
| MGST3_HUMAN                                                                              |                  | R.IASGLGLAWIVGR.V             | 2             | 2.9675        | O14880             |
| MGST3_HUMAN                                                                              |                  | R.IASGLGLAWIVGR.V             | 2             | 2.8869        | O14880             |
| MGST3_HUMAN                                                                              |                  | R.VLYAYGYTGEPSKR.S            | 2             | 3.4215        | O14880             |
| MGST3_HUMAN                                                                              |                  | R.VLYAYGYTGEPSKR.S            | 2             | 3.4692        | O14880             |
| MGST3_HUMAN                                                                              |                  | R.IASGLGLAWIVGR.V             | 2             | 3.2573        | O14880             |
| MGST3_HUMAN                                                                              |                  | R.IASGLGLAWIVGR.V             | 2             | 3.2765        | O14880             |
| MGST3_HUMAN                                                                              |                  | R.VLYAYGYTGEPSKR.S            | 2             | 2.8933        | O14880             |
| <b><i>Mitochondrial 2-oxoglutarate/malate carrier protein - Homo sapiens (Human)</i></b> |                  |                               |               |               |                    |
| M2OM_HUMAN                                                                               |                  | R.LGIYTVLFR.L                 | 2             | 2.6188        | Q02978             |
| <b><i>Mitochondrial carrier homolog 2 - Homo sapiens (Human)</i></b>                     |                  |                               |               |               |                    |
| MTCH2_HUMAN                                                                              |                  | K.VLIQVGYEPLPPTIGR.N          | 2             | 2.3481        | Q9Y6C9             |
| MTCH2_HUMAN                                                                              |                  | K.VLIQVGYEPLPPTIGR.N          | 2             | 2.3074        | Q9Y6C9             |
| <b><i>Mitochondrial import receptor subunit TOM22 homolog - Homo sapiens (Human)</i></b> |                  |                               |               |               |                    |
| TOM22_HUMAN                                                                              |                  | K.LQMEQQQLQQR.Q               | 2             | 4.001         | Q9NS69             |
| <b><i>Monocyte differentiation antigen CD14 precursor - Homo sapiens (Human)</i></b>     |                  |                               |               |               |                    |
| CD14_HUMAN                                                                               |                  | R.LTVGAAQVPAQLLVGALR.V        | 2             | 2.4556        | P08571             |
| CD14_HUMAN                                                                               |                  | K.FPAIQNLALR.N                | 2             | 2.7192        | P08571             |
| CD14_HUMAN                                                                               |                  | K.FPAIQNLALR.N                | 2             | 2.6048        | P08571             |
| CD14_HUMAN                                                                               |                  | R.AFPALTSLDLSDNPGLGER.G       | 2             | 3.6198        | P08571             |
| CD14_HUMAN                                                                               |                  | R.LTVGAAQVPAQLLVGALR.V        | 2             | 3.3594        | P08571             |
| CD14_HUMAN                                                                               |                  | R.LTVGAAQVPAQLLVGALR.V        | 2             | 2.9632        | P08571             |

| <i>Protein</i>                                                                    | <i>Reference</i> | <i>Peptide sequence</i>    | <i>Charge</i> | <i>XCorr*</i> | <i>Accession**</i> |
|-----------------------------------------------------------------------------------|------------------|----------------------------|---------------|---------------|--------------------|
|                                                                                   | CD14_HUMAN       | R.AFPALTSLDLSDNPGLGER.G    | 2             | 5.5742        | P08571             |
|                                                                                   | CD14_HUMAN       | R.SWLAELQQWLKPKLK.V        | 2             | 2.8424        | P08571             |
|                                                                                   | CD14_HUMAN       | R.AFPALTSLDLSDNPGLGER.G    | 2             | 3.6414        | P08571             |
| <b><i>Myeloblastin precursor - Homo sapiens (Human)</i></b>                       |                  |                            |               |               |                    |
|                                                                                   | PRTN3_HUMAN      | R.LVNVVLGAHNVR.T           | 2             | 2.7012        | P24158             |
|                                                                                   | PRTN3_HUMAN      | R.LVNVVLGAHNVR.T           | 2             | 2.8274        | P24158             |
|                                                                                   | PRTN3_HUMAN      | R.LVNVVLGAHNVR.T           | 2             | 2.8236        | P24158             |
|                                                                                   | PRTN3_HUMAN      | R.LVNVVLGAHNVR.T           | 2             | 3.1136        | P24158             |
| <b><i>Myeloid cell nuclear differentiation antigen - Homo sapiens (Human)</i></b> |                  |                            |               |               |                    |
|                                                                                   | MNDA_HUMAN       | K.LVC#GSHSFIK.V            | 2             | 2.5536        | P41218             |
|                                                                                   | MNDA_HUMAN       | K.VITISDYSEC#K.G           | 2             | 2.3314        | P41218             |
|                                                                                   | MNDA_HUMAN       | K.QASGTMVYGLFMLQK.K        | 2             | 2.332         | P41218             |
|                                                                                   | MNDA_HUMAN       | K.VITISDYSEC#K.G           | 2             | 2.572         | P41218             |
|                                                                                   | MNDA_HUMAN       | K.NTIYEIQDNTGSMDVVGSGK.W   | 2             | 4.5772        | P41218             |
| <b><i>Myeloid-associated differentiation marker - Homo sapiens (Human)</i></b>    |                  |                            |               |               |                    |
|                                                                                   | MYADM_HUMAN      | R.TTITTTTTSSSGLSPMIVGSPR.A | 2             | 4.8381        | Q96S97             |
| <b><i>Myeloperoxidase precursor - Homo sapiens (Human)</i></b>                    |                  |                            |               |               |                    |
|                                                                                   | PERM_HUMAN       | R.FPTDQLTPDQER.S           | 2             | 3.5995        | P05164             |
|                                                                                   | PERM_HUMAN       | K.NNIFM*SNSYPR.D           | 2             | 2.6143        | P05164             |
|                                                                                   | PERM_HUMAN       | R.VVLEGGIDPILR.G           | 2             | 2.8049        | P05164             |
|                                                                                   | PERM_HUMAN       | R.VVLEGGIDPILR.G           | 2             | 2.7576        | P05164             |
|                                                                                   | PERM_HUMAN       | R.IGLDLPALNMQR.S           | 2             | 2.4528        | P05164             |
|                                                                                   | PERM_HUMAN       | R.IGLDLPALNMQR.S           | 2             | 2.7467        | P05164             |
|                                                                                   | PERM_HUMAN       | R.IGLDLPALNMQR.S           | 2             | 2.5637        | P05164             |
|                                                                                   | PERM_HUMAN       | R.WLPAEYEDGFSLPYGWTPGVK.R  | 2             | 2.537         | P05164             |
|                                                                                   | PERM_HUMAN       | R.FPTDQLTPDQER.S           | 2             | 3.6082        | P05164             |
|                                                                                   | PERM_HUMAN       | R.IANVFTNAFR.Y             | 2             | 3.1063        | P05164             |
|                                                                                   | PERM_HUMAN       | R.IGLDLPALNMQR.S           | 2             | 2.7387        | P05164             |
|                                                                                   | PERM_HUMAN       | K.NNIFM*SNSYPR.D           | 2             | 2.6979        | P05164             |
|                                                                                   | PERM_HUMAN       | R.IGLDLPALNMQR.S           | 2             | 2.6975        | P05164             |
|                                                                                   | PERM_HUMAN       | R.WLPAEYEDGFSLPYGWTPGVK.R  | 2             | 3.3398        | P05164             |
|                                                                                   | PERM_HUMAN       | K.NNIFMSNSYPR.D            | 2             | 2.949         | P05164             |
|                                                                                   | PERM_HUMAN       | R.VVLEGGIDPILR.G           | 2             | 2.3521        | P05164             |
|                                                                                   | PERM_HUMAN       | R.VVLEGGIDPILR.G           | 2             | 2.3203        | P05164             |
|                                                                                   | PERM_HUMAN       | R.IGLDLPALNMQR.S           | 2             | 2.5673        | P05164             |

| <i>Protein</i>                                 | <i>Reference</i> | <i>Peptide sequence</i> | <i>Charge</i> | <i>XCorr*</i> | <i>Accession**</i> |
|------------------------------------------------|------------------|-------------------------|---------------|---------------|--------------------|
|                                                | PERM_HUMAN       | R.IGLDLPALNMQR.S        | 2             | 3.2533        | P05164             |
| <b><i>Myosin-10 - Homo sapiens (Human)</i></b> |                  |                         |               |               |                    |
|                                                | MYH10_HUMAN      | K.KFDQLLAEEK.S          | 2             | 2.4609        | P35580             |
|                                                | MYH10_HUMAN      | K.KFDQLLAEEK.S          | 2             | 2.6724        | P35580             |
|                                                | MYH10_HUMAN      | K.KFDQLLAEEK.S          | 2             | 2.4628        | P35580             |
|                                                | MYH10_HUMAN      | R.AGVLAHLEEEER.D        | 2             | 3.0529        | P35580             |
| <b><i>Myosin-11 - Homo sapiens (Human)</i></b> |                  |                         |               |               |                    |
|                                                | MYH11_HUMAN      | R.NTDQASMPDNTAAQK.V     | 2             | 2.7626        | P35749             |
|                                                | MYH11_HUMAN      | K.QLLQANPILEAFGNAK.T    | 2             | 3.1103        | P35749             |
|                                                | MYH11_HUMAN      | R.NTDQASMPDNTAAQK.V     | 2             | 3.8828        | P35749             |
|                                                | MYH11_HUMAN      | R.NTDQASMPDNTAAQK.V     | 2             | 3.5119        | P35749             |
|                                                | MYH11_HUMAN      | R.NTDQASMPDNTAAQK.V     | 2             | 3.0553        | P35749             |
|                                                | MYH11_HUMAN      | R.NTDQASMPDNTAAQK.V     | 2             | 2.6505        | P35749             |
| <b><i>Myosin-9 - Homo sapiens (Human)</i></b>  |                  |                         |               |               |                    |
|                                                | MYH9_HUMAN       | R.ELEDATETADAMNR.E      | 2             | 3.1606        | P35579             |
|                                                | MYH9_HUMAN       | K.IAQLEEQLDNETK.E       | 2             | 4.6601        | P35579             |
|                                                | MYH9_HUMAN       | K.IAQLEEQLDNETK.E       | 2             | 4.4803        | P35579             |
|                                                | MYH9_HUMAN       | R.IMGIPEEEQMGLLR.V      | 2             | 2.6806        | P35579             |
|                                                | MYH9_HUMAN       | R.IMGIPEEEQMGLLR.V      | 2             | 2.3042        | P35579             |
|                                                | MYH9_HUMAN       | R.VISGVLQLGNIVFKK.E     | 2             | 2.4947        | P35579             |
|                                                | MYH9_HUMAN       | R.TFHIFYLLSGAGEHLK.T    | 3             | 4.6782        | P35579             |
|                                                | MYH9_HUMAN       | R.VISGVLQLGNIVFK.K      | 2             | 3.1529        | P35579             |
|                                                | MYH9_HUMAN       | R.VISGVLQLGNIVFK.K      | 2             | 4.0607        | P35579             |
|                                                | MYH9_HUMAN       | R.VISGVLQLGNIVFK.K      | 2             | 2.759         | P35579             |
|                                                | MYH9_HUMAN       | K.IAQLEEQLDNETK.E       | 2             | 2.9088        | P35579             |
|                                                | MYH9_HUMAN       | R.IAEFTTNLTETEEEEK.S    | 2             | 3.4293        | P35579             |
|                                                | MYH9_HUMAN       | K.ANLQIDQINTDLNLER.S    | 2             | 3.9662        | P35579             |
|                                                | MYH9_HUMAN       | R.VISGVLQLGNIVFK.K      | 2             | 2.6211        | P35579             |
|                                                | MYH9_HUMAN       | K.IAQLEEQLDNETK.E       | 2             | 4.5863        | P35579             |
|                                                | MYH9_HUMAN       | K.IAQLEEQLDNETK.E       | 2             | 4.1911        | P35579             |
|                                                | MYH9_HUMAN       | K.ALELDSNLYR.I          | 2             | 2.4031        | P35579             |
|                                                | MYH9_HUMAN       | K.ANLQIDQINTDLNLER.S    | 2             | 2.5897        | P35579             |
|                                                | MYH9_HUMAN       | R.IMGIPEEEQMGLLR.V      | 2             | 2.5255        | P35579             |
|                                                | MYH9_HUMAN       | R.VISGVLQLGNIVFKK.E     | 2             | 2.9152        | P35579             |
|                                                | MYH9_HUMAN       | R.VISGVLQLGNIVFK.K      | 2             | 4.0932        | P35579             |



| <i>Protein</i> | <i>Reference</i> | <i>Peptide sequence</i> | <i>Charge</i> | <i>XCorr*</i> | <i>Accession**</i> |
|----------------|------------------|-------------------------|---------------|---------------|--------------------|
| MYH9_HUMAN     |                  | R.TVGQLYKEQLAK.L        | 2             | 2.8696        | P35579             |
| MYH9_HUMAN     |                  | R.VISGVLQLGNIVFK.K      | 2             | 2.4986        | P35579             |
| MYH9_HUMAN     |                  | K.KLEEEQIILEDQNC#K.L    | 2             | 4.392         | P35579             |
| MYH9_HUMAN     |                  | K.IAQLEEQLDNETK.E       | 2             | 3.1768        | P35579             |
| MYH9_HUMAN     |                  | R.IAEFTTNLTETEEEK.S     | 2             | 2.946         | P35579             |
| MYH9_HUMAN     |                  | R.IAEFTTNLTETEEEK.S     | 2             | 4.4916        | P35579             |
| MYH9_HUMAN     |                  | K.TDLLLEPYNKYR.F        | 2             | 2.3255        | P35579             |
| MYH9_HUMAN     |                  | R.IMGIPEEEQMGLLR.V      | 2             | 2.4661        | P35579             |
| MYH9_HUMAN     |                  | R.VISGVLQLGNIVFKK.E     | 2             | 3.0503        | P35579             |
| MYH9_HUMAN     |                  | R.VISGVLQLGNIVFK.K      | 2             | 3.4446        | P35579             |
| MYH9_HUMAN     |                  | R.VISGVLQLGNIVFK.K      | 2             | 4.0141        | P35579             |

***Myosin-IG - Homo sapiens (Human)***

|              |  |                         |   |        |        |
|--------------|--|-------------------------|---|--------|--------|
| Q6ZNK5_HUMAN |  | R.LLYNSTDPTLR.A         | 2 | 2.4388 | Q6ZNK5 |
| Q6ZNK5_HUMAN |  | R.DYLSSATDNPTASSLFAQR.L | 2 | 4.2567 | Q6ZNK5 |
| Q6ZNK5_HUMAN |  | R.LIPIVLLLQK.A          | 2 | 2.7839 | Q6ZNK5 |
| Q6ZNK5_HUMAN |  | R.LIPIVLLLQK.A          | 2 | 2.9049 | Q6ZNK5 |
| Q6ZNK5_HUMAN |  | R.LIPIVLLLQK.A          | 2 | 2.5603 | Q6ZNK5 |
| Q6ZNK5_HUMAN |  | R.DYLSSATDNPTASSLFAQR.L | 2 | 3.3048 | Q6ZNK5 |
| Q6ZNK5_HUMAN |  | R.LIPIVLLLQK.A          | 2 | 2.7466 | Q6ZNK5 |
| Q6ZNK5_HUMAN |  | K.VAAMGALQGLR.Q         | 2 | 2.5136 | Q6ZNK5 |

***NACHT, LRR and PYD domains-containing protein 8 - Homo sapiens (Human)***

|             |  |                       |   |       |        |
|-------------|--|-----------------------|---|-------|--------|
| NALP8_HUMAN |  | R.IGNNKEVQVSFAFCLKR.C | 2 | 2.632 | Q86W28 |
|-------------|--|-----------------------|---|-------|--------|

***NADH dehydrogenase [ubiquinone] 1 alpha subcomplex subunit 4 - Homo sapiens (Human)***

|             |  |                  |   |        |        |
|-------------|--|------------------|---|--------|--------|
| NDUA4_HUMAN |  | R.LALFNPVC#WDR.N | 2 | 2.5406 | O00483 |
| NDUA4_HUMAN |  | R.LALFNPVC#WDR.N | 2 | 2.8725 | O00483 |
| NDUA4_HUMAN |  | K.FYSVNVDSK.L    | 2 | 2.314  | O00483 |
| NDUA4_HUMAN |  | R.LALFNPVC#WDR.N | 2 | 2.5737 | O00483 |

***NADH dehydrogenase [ubiquinone] 1 alpha subcomplex subunit 9, mitochondrial precursor - H***

|             |  |                  |   |        |        |
|-------------|--|------------------|---|--------|--------|
| NDUA9_HUMAN |  | R.LFLPFPLPFAYR.W | 2 | 2.7798 | Q16795 |
| NDUA9_HUMAN |  | R.LFLPFPLPFAYR.W | 2 | 2.5351 | Q16795 |

***NADH dehydrogenase [ubiquinone] 1 beta subcomplex subunit 10 - Homo sapiens (Human)***

|             |  |                 |   |        |        |
|-------------|--|-----------------|---|--------|--------|
| NDUBA_HUMAN |  | R.YQDLGAYSSAR.K | 2 | 2.557  | O96000 |
| NDUBA_HUMAN |  | R.YQDLGAYSSAR.K | 2 | 3.0515 | O96000 |

***NADH dehydrogenase [ubiquinone] 1 beta subcomplex subunit 8, mitochondrial precursor - Ho***

|             |  |                        |   |        |        |
|-------------|--|------------------------|---|--------|--------|
| NDUB8_HUMAN |  | R.VEDYEPYPDDGMGYDYPK.L | 2 | 2.3137 | O95169 |
|-------------|--|------------------------|---|--------|--------|

| <i>Protein</i>                                                                                        | <i>Reference</i> | <i>Peptide sequence</i>    | <i>Charge</i> | <i>XCorr*</i> | <i>Accession**</i> |
|-------------------------------------------------------------------------------------------------------|------------------|----------------------------|---------------|---------------|--------------------|
| <b><i>NADH-cytochrome b5 reductase 3 - Homo sapiens (Human)</i></b>                                   |                  |                            |               |               |                    |
| NB5R3_HUMAN                                                                                           |                  | K.SVGMIAGGTGITPMLQVIR.A    | 2             | 2.3104        | P00387             |
| NB5R3_HUMAN                                                                                           |                  | R.GPSGLLVYQGK.G            | 2             | 2.3452        | P00387             |
| NB5R3_HUMAN                                                                                           |                  | K.SVGMIAGGTGITPMLQVIR.A    | 2             | 2.4224        | P00387             |
| NB5R3_HUMAN                                                                                           |                  | R.STPAITLESPIKYLPLR.L      | 2             | 2.9897        | P00387             |
| <b><i>NADH-ubiquinone oxidoreductase chain 4 - Homo sapiens (Human)</i></b>                           |                  |                            |               |               |                    |
| NU4M_HUMAN                                                                                            |                  | K.LIVPTIMLLPLTWLSK.K       | 2             | 3.2721        | P03905             |
| NU4M_HUMAN                                                                                            |                  | K.MPLYGLHLWLPK.A           | 2             | 2.5434        | P03905             |
| <b><i>NADH-ubiquinone oxidoreductase chain 5 - Homo sapiens (Human)</i></b>                           |                  |                            |               |               |                    |
| NU5M_HUMAN                                                                                            |                  | R.FPTLTNINENNPTLLNPIK.R    | 2             | 2.8521        | P03915             |
| <b><i>NEDD9-interacting protein with calponin homology and LIM domains - Homo sapiens (Human)</i></b> |                  |                            |               |               |                    |
| MICA1_HUMAN                                                                                           |                  | R.IYNQSFQSLK.A             | 2             | 2.8762        | Q8TDZ2             |
| <b><i>Neurolysin, mitochondrial precursor - Homo sapiens (Human)</i></b>                              |                  |                            |               |               |                    |
| NEUL_HUMAN                                                                                            |                  | R.FDIEMSM*RGDIFER.I        | 2             | 2.4227        | Q9BYT8             |
| <b><i>Neutrophil cytosol factor 2 - Homo sapiens (Human)</i></b>                                      |                  |                            |               |               |                    |
| NCF2_HUMAN                                                                                            |                  | R.IC#FNIGC#MYTILK.N        | 2             | 2.6582        | P19878             |
| NCF2_HUMAN                                                                                            |                  | R.IHPQQPQEESPPQSDIPAPSSK.A | 3             | 4.7232        | P19878             |
| <b><i>Nuclear factor NF-kappa-B p105 subunit - Homo sapiens (Human)</i></b>                           |                  |                            |               |               |                    |
| NFKB1_HUMAN                                                                                           |                  | R.RLEPVVSDAIYDSK.A         | 2             | 2.5701        | P19838             |
| <b><i>Nuclear pore membrane glycoprotein 210 precursor - Homo sapiens (Human)</i></b>                 |                  |                            |               |               |                    |
| PO210_HUMAN                                                                                           |                  | R.LPSQYNFAMNVLGR.V         | 2             | 3.1591        | Q8TEM1             |
| PO210_HUMAN                                                                                           |                  | R.LPSQYNFAMNVLGR.V         | 2             | 2.678         | Q8TEM1             |
| PO210_HUMAN                                                                                           |                  | R.LPSQYNFAMNVLGR.V         | 2             | 3.2966        | Q8TEM1             |
| PO210_HUMAN                                                                                           |                  | R.LPSQYNFAMNVLGR.V         | 2             | 3.326         | Q8TEM1             |
| PO210_HUMAN                                                                                           |                  | R.LPSQYNFAMNVLGR.V         | 2             | 2.4113        | Q8TEM1             |
| PO210_HUMAN                                                                                           |                  | R.LPSQYNFAMNVLGR.V         | 2             | 2.6465        | Q8TEM1             |
| PO210_HUMAN                                                                                           |                  | R.VFGAPEVLENLEVK.S         | 2             | 2.7087        | Q8TEM1             |
| PO210_HUMAN                                                                                           |                  | K.TGAYQYTIR.A              | 2             | 2.4443        | Q8TEM1             |
| PO210_HUMAN                                                                                           |                  | K.AVDPTSGQLYGLAR.E         | 2             | 2.8121        | Q8TEM1             |
| PO210_HUMAN                                                                                           |                  | R.GVAIGQTSLTASVTNK.A       | 2             | 3.7122        | Q8TEM1             |
| PO210_HUMAN                                                                                           |                  | R.LPSQYNFAMNVLGR.V         | 2             | 3.133         | Q8TEM1             |
| PO210_HUMAN                                                                                           |                  | R.LPSQYNFAMNVLGR.V         | 2             | 3.0247        | Q8TEM1             |
| PO210_HUMAN                                                                                           |                  | R.LPSQYNFAMNVLGR.V         | 2             | 3.3645        | Q8TEM1             |
| <b><i>Peptidyl-prolyl cis-trans isomerase A - Homo sapiens (Human)</i></b>                            |                  |                            |               |               |                    |

| <i>Protein</i>                                                                          | <i>Reference</i> | <i>Peptide sequence</i> | <i>Charge</i> | <i>XCorr*</i> | <i>Accession**</i> |
|-----------------------------------------------------------------------------------------|------------------|-------------------------|---------------|---------------|--------------------|
|                                                                                         | PPIA_HUMAN       | K.SIYGKFEFENFILK.H      | 2             | 2.8562        | P62937             |
| <b><i>Peripherin - Homo sapiens (Human)</i></b>                                         |                  |                         |               |               |                    |
|                                                                                         | PERI_HUMAN       | K.NLQEAEWYK.S           | 2             | 2.3227        | P41219             |
| <b><i>Peroxiredoxin-6 - Homo sapiens (Human)</i></b>                                    |                  |                         |               |               |                    |
|                                                                                         | PRDX6_HUMAN      | K.DINAYNC#EEPTK.L       | 2             | 2.5337        | P30041             |
| <b><i>Phosphate carrier protein, mitochondrial precursor - Homo sapiens (Human)</i></b> |                  |                         |               |               |                    |
|                                                                                         | MPCP_HUMAN       | R.IQTQPGYANTLR.D        | 2             | 2.8696        | Q00325             |
|                                                                                         | MPCP_HUMAN       | K.VLYSNMLGEENTYLWR.T    | 2             | 3.3114        | Q00325             |
|                                                                                         | MPCP_HUMAN       | K.GWAPTFLGYSMQGLC#K.F   | 2             | 2.6215        | Q00325             |
|                                                                                         | MPCP_HUMAN       | R.IQTQPGYANTLR.D        | 2             | 2.4403        | Q00325             |
|                                                                                         | MPCP_HUMAN       | R.IQTQPGYANTLR.D        | 2             | 2.9696        | Q00325             |
|                                                                                         | MPCP_HUMAN       | K.GWAPTFLGYSMQGLC#K.F   | 2             | 2.4814        | Q00325             |
|                                                                                         | MPCP_HUMAN       | R.IQTQPGYANTLR.D        | 2             | 2.9319        | Q00325             |
|                                                                                         | MPCP_HUMAN       | R.IQTQPGYANTLR.D        | 2             | 3.0071        | Q00325             |
|                                                                                         | MPCP_HUMAN       | R.IQTQPGYANTLR.D        | 2             | 2.6159        | Q00325             |
|                                                                                         | MPCP_HUMAN       | R.IQTQPGYANTLR.D        | 2             | 2.6014        | Q00325             |
| <b><i>Plastin-2 - Homo sapiens (Human)</i></b>                                          |                  |                         |               |               |                    |
|                                                                                         | PLSL_HUMAN       | R.YTLNILEEIGGGQK.V      | 2             | 2.7998        | P13796             |
|                                                                                         | PLSL_HUMAN       | K.LNLAFIANLFNR.Y        | 2             | 3.7844        | P13796             |
|                                                                                         | PLSL_HUMAN       | K.LNLAFIANLFNR.Y        | 2             | 3.0525        | P13796             |
|                                                                                         | PLSL_HUMAN       | R.YTLNILEEIGGGQK.V      | 2             | 3.36          | P13796             |
|                                                                                         | PLSL_HUMAN       | K.LNLAFIANLFNR.Y        | 2             | 3.8418        | P13796             |
|                                                                                         | PLSL_HUMAN       | K.LNLAFIANLFNR.Y        | 2             | 3.8814        | P13796             |
|                                                                                         | PLSL_HUMAN       | K.LNLAFIANLFNR.Y        | 2             | 3.4597        | P13796             |
|                                                                                         | PLSL_HUMAN       | R.VYALPEDLVEVNP.K.M     | 2             | 2.396         | P13796             |
|                                                                                         | PLSL_HUMAN       | R.YTLNILEEIGGGQK.V      | 2             | 3.2524        | P13796             |
| <b><i>Platelet glycoprotein 4 - Homo sapiens (Human)</i></b>                            |                  |                         |               |               |                    |
|                                                                                         | CD36_HUMAN       | R.SIYAVFESDVNLK.G       | 2             | 2.9212        | P16671             |
|                                                                                         | CD36_HUMAN       | R.TYLDIEPITGFTLQFAK.R   | 2             | 2.455         | P16671             |
|                                                                                         | CD36_HUMAN       | R.TYLDIEPITGFTLQFAK.R   | 2             | 2.5732        | P16671             |
|                                                                                         | CD36_HUMAN       | R.SIYAVFESDVNLK.G       | 2             | 3.1792        | P16671             |
|                                                                                         | CD36_HUMAN       | R.SIYAVFESDVNLK.G       | 2             | 2.8482        | P16671             |
|                                                                                         | CD36_HUMAN       | R.SIYAVFESDVNLK.G       | 2             | 2.8256        | P16671             |
|                                                                                         | CD36_HUMAN       | R.SIYAVFESDVNLK.G       | 2             | 2.6568        | P16671             |
|                                                                                         | CD36_HUMAN       | R.SIYAVFESDVNLK.G       | 2             | 2.3905        | P16671             |

| <i>Protein</i>                                                                 | <i>Reference</i> | <i>Peptide sequence</i>  | <i>Charge</i> | <i>XCorr*</i> | <i>Accession**</i> |
|--------------------------------------------------------------------------------|------------------|--------------------------|---------------|---------------|--------------------|
| <b><i>Poly [ADP-ribose] polymerase 4 - Homo sapiens (Human)</i></b>            |                  |                          |               |               |                    |
|                                                                                | PARP4_HUMAN      | K.YIIKFSM*PGDQIK.D       | 2             | 2.3141        | Q9UUKK3            |
| <b><i>Poly(rC)-binding protein 1 - Homo sapiens (Human)</i></b>                |                  |                          |               |               |                    |
|                                                                                | PCBP1_HUMAN      | R.INISEGNC#PER.I         | 2             | 3.0262        | Q15365             |
|                                                                                | PCBP1_HUMAN      | R.IITLTGPTNAIFK.A        | 2             | 2.5242        | Q15365             |
|                                                                                | PCBP1_HUMAN      | R.IITLTGPTNAIFK.A        | 2             | 2.5772        | Q15365             |
|                                                                                | PCBP1_HUMAN      | R.INISEGNC#PER.I         | 2             | 3.0041        | Q15365             |
|                                                                                | PCBP1_HUMAN      | R.IITLTGPTNAIFK.A        | 2             | 2.6541        | Q15365             |
|                                                                                | PCBP1_HUMAN      | R.IITLTGPTNAIFK.A        | 2             | 3.0212        | Q15365             |
|                                                                                | PCBP1_HUMAN      | R.INISEGNC#PER.I         | 2             | 3.1477        | Q15365             |
|                                                                                | PCBP1_HUMAN      | R.ESTGAQVQVAGDMLPNSTER.A | 2             | 3.9682        | Q15365             |
| <b><i>Poly(rC)-binding protein 2 - Homo sapiens (Human)</i></b>                |                  |                          |               |               |                    |
|                                                                                | PCBP2_HUMAN      | R.IITLAGPTNAIFK.A        | 2             | 2.8649        | Q15366             |
|                                                                                | PCBP2_HUMAN      | R.IITLAGPTNAIFK.A        | 2             | 2.6625        | Q15366             |
|                                                                                | PCBP2_HUMAN      | R.IITLAGPTNAIFK.A        | 2             | 2.5305        | Q15366             |
|                                                                                | PCBP2_HUMAN      | R.IITLAGPTNAIFK.A        | 2             | 2.6848        | Q15366             |
| <b><i>Polypyrimidine tract-binding protein 1 - Homo sapiens (Human)</i></b>    |                  |                          |               |               |                    |
|                                                                                | PTBP1_HUMAN      | K.LSLDGQNIYNAC#C#TLR.I   | 2             | 3.7542        | P26599             |
| <b><i>PRA1 family protein 3 - Homo sapiens (Human)</i></b>                     |                  |                          |               |               |                    |
|                                                                                | PRAF3_HUMAN      | R.AWDDFFPGSDR.F          | 2             | 2.4809        | O75915             |
|                                                                                | PRAF3_HUMAN      | R.AWDDFFPGSDR.F          | 2             | 2.5708        | O75915             |
| <b><i>Probable ATP-dependent RNA helicase DDX17 - Homo sapiens (Human)</i></b> |                  |                          |               |               |                    |
|                                                                                | DDX17_HUMAN      | R.MLDMGFEPQIR.K          | 2             | 2.8503        | Q92841             |
| <b><i>Prohibitin - Homo sapiens (Human)</i></b>                                |                  |                          |               |               |                    |
|                                                                                | PHB_HUMAN        | R.FDAGELITQR.E           | 2             | 2.6648        | P35232             |
|                                                                                | PHB_HUMAN        | K.DLQNVNITLR.I           | 2             | 2.8585        | P35232             |
|                                                                                | PHB_HUMAN        | R.IFTSIGEDYDER.V         | 2             | 2.4339        | P35232             |
|                                                                                | PHB_HUMAN        | R.FDAGELITQR.E           | 2             | 2.6686        | P35232             |
|                                                                                | PHB_HUMAN        | R.ILFRPVASQLPR.I         | 2             | 2.4915        | P35232             |
|                                                                                | PHB_HUMAN        | R.KLEAAEDIAYQLSR.S       | 2             | 4.0971        | P35232             |
| <b><i>Prohibitin-2 - Homo sapiens (Human)</i></b>                              |                  |                          |               |               |                    |
|                                                                                | PHB2_HUMAN       | K.IVQAEGEAEAAK.M         | 2             | 2.5851        | Q99623             |
|                                                                                | PHB2_HUMAN       | R.IPWFQYPIIDIR.A         | 2             | 2.6232        | Q99623             |
|                                                                                | PHB2_HUMAN       | K.IVQAEGEAEAAK.M         | 2             | 3.1053        | Q99623             |

| <i>Protein</i>                                                                               | <i>Reference</i> | <i>Peptide sequence</i> | <i>Charge</i> | <i>XCorr*</i> | <i>Accession**</i> |
|----------------------------------------------------------------------------------------------|------------------|-------------------------|---------------|---------------|--------------------|
| PHB2_HUMAN                                                                                   |                  | K.FNASQLITQR.A          | 2             | 2.9279        | Q99623             |
| PHB2_HUMAN                                                                                   |                  | R.IYLTADNLVLNLQDESFTR.G | 2             | 2.5971        | Q99623             |
| PHB2_HUMAN                                                                                   |                  | K.IVQAEGEAEAAK.M        | 2             | 3.2251        | Q99623             |
| PHB2_HUMAN                                                                                   |                  | R.LGLDYEER.V            | 2             | 2.3268        | Q99623             |
| PHB2_HUMAN                                                                                   |                  | R.IGGVQQDTILAEGLHFR.I   | 3             | 4.1001        | Q99623             |
| PHB2_HUMAN                                                                                   |                  | K.IVQAEGEAEAAK.M        | 2             | 2.7091        | Q99623             |
| PHB2_HUMAN                                                                                   |                  | K.FNASQLITQR.A          | 2             | 2.7923        | Q99623             |
| PHB2_HUMAN                                                                                   |                  | K.FNASQLITQR.A          | 2             | 2.9658        | Q99623             |
| PHB2_HUMAN                                                                                   |                  | K.LLLGAGAVAYGVR.E       | 2             | 2.4611        | Q99623             |
| PHB2_HUMAN                                                                                   |                  | R.VLSRPNAQELPSMYQR.L    | 2             | 3.2936        | Q99623             |
| <b><i>Proteasome activator complex subunit 2 - Homo sapiens (Human)</i></b>                  |                  |                         |               |               |                    |
| PSME2_HUMAN                                                                                  |                  | R.AFYAELYHISSNLEK.I     | 2             | 3.077         | Q9UL46             |
| PSME2_HUMAN                                                                                  |                  | R.AFYAELYHISSNLEK.I     | 2             | 4.0342        | Q9UL46             |
| PSME2_HUMAN                                                                                  |                  | R.AFYAELYHISSNLEK.I     | 2             | 2.6221        | Q9UL46             |
| <b><i>Protein FAM62A - Homo sapiens (Human)</i></b>                                          |                  |                         |               |               |                    |
| FA62A_HUMAN                                                                                  |                  | R.LLVPLVPDLQDVAQLR.S    | 2             | 3.4462        | Q9BSJ8             |
| <b><i>Protein kinase C-binding protein 1 - Homo sapiens (Human)</i></b>                      |                  |                         |               |               |                    |
| PKCB1_HUMAN                                                                                  |                  | R.LIAEVKKQLELEK.Q       | 2             | 2.3067        | Q9ULU4             |
| <b><i>Protein LYRIC - Homo sapiens (Human)</i></b>                                           |                  |                         |               |               |                    |
| LYRIC_HUMAN                                                                                  |                  | R.TELGLDLGLEPK.R        | 2             | 2.6699        | Q86UE4             |
| LYRIC_HUMAN                                                                                  |                  | R.SWQDELAQQAEEGSAR.L    | 2             | 3.4474        | Q86UE4             |
| <b><i>Protein S100-A8 - Homo sapiens (Human)</i></b>                                         |                  |                         |               |               |                    |
| S10A8_HUMAN                                                                                  |                  | K.LLETEC#PQYIR.K        | 2             | 2.7924        | P05109             |
| S10A8_HUMAN                                                                                  |                  | K.LLETEC#PQYIR.K        | 2             | 2.5517        | P05109             |
| S10A8_HUMAN                                                                                  |                  | K.LLETEC#PQYIR.K        | 2             | 2.8931        | P05109             |
| S10A8_HUMAN                                                                                  |                  | K.LLETEC#PQYIR.K        | 2             | 2.4833        | P05109             |
| S10A8_HUMAN                                                                                  |                  | K.LLETEC#PQYIR.K        | 2             | 2.6589        | P05109             |
| <b><i>Protein S100-A9 - Homo sapiens (Human)</i></b>                                         |                  |                         |               |               |                    |
| S10A9_HUMAN                                                                                  |                  | R.NIETIINTFHQYSVK.L     | 2             | 3.1467        | P06702             |
| S10A9_HUMAN                                                                                  |                  | R.NIETIINTFHQYSVK.L     | 2             | 3.428         | P06702             |
| S10A9_HUMAN                                                                                  |                  | R.NIETIINTFHQYSVK.L     | 2             | 2.9079        | P06702             |
| <b><i>Protein transport protein Sec61 subunit alpha isoform 1 - Homo sapiens (Human)</i></b> |                  |                         |               |               |                    |
| S61A1_HUMAN                                                                                  |                  | R.GMEFEGAIILFHLLATR.T   | 3             | 4.0181        | P61619             |
| S61A1_HUMAN                                                                                  |                  | R.GMEFEGAIILFHLLATR.T   | 2             | 3.9445        | P61619             |

| <i>Protein</i>                                                                            | <i>Reference</i> | <i>Peptide sequence</i> | <i>Charge</i> | <i>XCorr*</i> | <i>Accession**</i> |
|-------------------------------------------------------------------------------------------|------------------|-------------------------|---------------|---------------|--------------------|
| <b><i>Proteolipid protein 2 - Homo sapiens (Human)</i></b>                                |                  |                         |               |               |                    |
|                                                                                           | PLP2_HUMAN       | R.HTAAPTDPADGPV.-       | 2             | 2.6251        | Q04941             |
|                                                                                           | PLP2_HUMAN       | R.HTAAPTDPADGPV.-       | 2             | 2.3578        | Q04941             |
|                                                                                           | PLP2_HUMAN       | R.HTAAPTDPADGPV.-       | 2             | 2.5996        | Q04941             |
| <b><i>Putative uncharacterized protein - Homo sapiens (Human)</i></b>                     |                  |                         |               |               |                    |
|                                                                                           | A5D8X1_HUMAN     | R.FIAVGYVDDTEFVR.F      | 2             | 4.0161        | A5D8X1             |
|                                                                                           | A5D8X1_HUMAN     | R.FIAVGYVDDTEFVR.F      | 2             | 2.8839        | A5D8X1             |
|                                                                                           | A5D8X1_HUMAN     | R.FIAVGYVDDTEFVR.F      | 2             | 2.6639        | A5D8X1             |
| <b><i>Pyruvate kinase isozymes M1/M2 - Homo sapiens (Human)</i></b>                       |                  |                         |               |               |                    |
|                                                                                           | KPYM_HUMAN       | K.GADFLVTEVENGGSLGSK.K  | 2             | 2.5362        | P14618             |
| <b><i>Rab11 family-interacting protein 4 - Homo sapiens (Human)</i></b>                   |                  |                         |               |               |                    |
|                                                                                           | RFIP4_HUMAN      | K.KVTELENDSLTNGDLK.S    | 2             | 2.7758        | Q86YS3             |
| <b><i>Ras GTPase-activating-like protein IQGAP1 - Homo sapiens (Human)</i></b>            |                  |                         |               |               |                    |
|                                                                                           | IQGA1_HUMAN      | R.SNQQLENDLNLMDIK.I     | 2             | 2.8679        | P46940             |
|                                                                                           | IQGA1_HUMAN      | K.LTELGTVDPK.N          | 2             | 2.3317        | P46940             |
|                                                                                           | IQGA1_HUMAN      | R.SNQQLENDLNLMDIK.I     | 2             | 2.9638        | P46940             |
|                                                                                           | IQGA1_HUMAN      | K.VNVNLLIFLLNK.K        | 2             | 3.103         | P46940             |
|                                                                                           | IQGA1_HUMAN      | K.SWVNQMESQTGEASK.L     | 2             | 3.1883        | P46940             |
|                                                                                           | IQGA1_HUMAN      | K.SKVDQIQEIVTGNPTVIK.M  | 2             | 3.0469        | P46940             |
| <b><i>Ras GTPase-activating-like protein IQGAP2 - Homo sapiens (Human)</i></b>            |                  |                         |               |               |                    |
|                                                                                           | IQGA2_HUMAN      | K.LPYDVTTEQUALTYPEVK.N  | 2             | 3.4655        | Q13576             |
| <b><i>Ras-related C3 botulinum toxin substrate 1 precursor - Homo sapiens (Human)</i></b> |                  |                         |               |               |                    |
|                                                                                           | RAC1_HUMAN       | K.YLEC#SALTQR.G         | 2             | 2.4444        | P63000             |
|                                                                                           | RAC1_HUMAN       | K.YLEC#SALTQR.G         | 2             | 2.5506        | P63000             |
|                                                                                           | RAC1_HUMAN       | K.YLEC#SALTQR.G         | 2             | 2.4905        | P63000             |
|                                                                                           | RAC1_HUMAN       | K.YLEC#SALTQR.G         | 2             | 2.3411        | P63000             |
| <b><i>Ras-related protein Rab-10 - Homo sapiens (Human)</i></b>                           |                  |                         |               |               |                    |
|                                                                                           | RAB10_HUMAN      | K.AFLTLAEDILR.K         | 2             | 2.3268        | P61026             |
|                                                                                           | RAB10_HUMAN      | K.AFLTLAEDILR.K         | 2             | 2.7012        | P61026             |
| <b><i>Ras-related protein Rab-3D - Homo sapiens (Human)</i></b>                           |                  |                         |               |               |                    |
|                                                                                           | RAB3D_HUMAN      | R.LADDLGFEFFFEASAK.E    | 2             | 3.2682        | O95716             |
|                                                                                           | RAB3D_HUMAN      | R.LADDLGFEFFFEASAK.E    | 2             | 3.7809        | O95716             |
|                                                                                           | RAB3D_HUMAN      | R.LADDLGFEFFFEASAK.E    | 2             | 2.802         | O95716             |
|                                                                                           | RAB3D_HUMAN      | R.LADDLGFEFFFEASAK.E    | 2             | 3.5789        | O95716             |

| <i>Protein</i>                                                                         | <i>Reference</i> | <i>Peptide sequence</i> | <i>Charge</i> | <i>XCorr*</i> | <i>Accession**</i> |
|----------------------------------------------------------------------------------------|------------------|-------------------------|---------------|---------------|--------------------|
| <b><i>Ras-related protein Rab-5C - Homo sapiens (Human)</i></b>                        |                  |                         |               |               |                    |
| RAB5C_HUMAN                                                                            |                  | R.GVDLQENNPASR.S        | 2             | 2.7961        | P51148             |
| RAB5C_HUMAN                                                                            |                  | R.GVDLQENNPASR.S        | 2             | 3.2409        | P51148             |
| RAB5C_HUMAN                                                                            |                  | R.GVDLQENNPASR.S        | 2             | 3.1379        | P51148             |
| RAB5C_HUMAN                                                                            |                  | R.GVDLQENNPASR.S        | 2             | 3.3823        | P51148             |
| RAB5C_HUMAN                                                                            |                  | R.GVDLQENNPASR.S        | 2             | 2.9479        | P51148             |
| RAB5C_HUMAN                                                                            |                  | R.GVDLQENNPASR.S        | 2             | 3.2858        | P51148             |
| <b><i>Ras-related protein Rap-1A precursor - Homo sapiens (Human)</i></b>              |                  |                         |               |               |                    |
| RAP1A_HUMAN                                                                            |                  | K.INVNEIFYDLVR.Q        | 2             | 4.1354        | P62834             |
| RAP1A_HUMAN                                                                            |                  | K.LVVLGSGGVGK.S         | 2             | 2.5519        | P62834             |
| RAP1A_HUMAN                                                                            |                  | K.INVNEIFYDLVR.Q        | 2             | 3.7014        | P62834             |
| RAP1A_HUMAN                                                                            |                  | K.SKINVNEIFYDLVR.Q      | 2             | 2.7059        | P62834             |
| RAP1A_HUMAN                                                                            |                  | K.INVNEIFYDLVR.Q        | 2             | 4.238         | P62834             |
| <b><i>Receptor expression-enhancing protein 5 - Homo sapiens (Human)</i></b>           |                  |                         |               |               |                    |
| REEP5_HUMAN                                                                            |                  | K.HESQMDSVVK.D          | 2             | 2.9746        | Q00765             |
| REEP5_HUMAN                                                                            |                  | K.HESQMDSVVK.D          | 2             | 2.5697        | Q00765             |
| REEP5_HUMAN                                                                            |                  | K.HESQMDSVVK.D          | 2             | 3.0614        | Q00765             |
| <b><i>Renin receptor precursor - Homo sapiens (Human)</i></b>                          |                  |                         |               |               |                    |
| RENH_HUMAN                                                                             |                  | K.NPASPYNLAYK.Y         | 2             | 2.4263        | O75787             |
| <b><i>RER1 retention in endoplasmic reticulum 1 homolog - Homo sapiens (Human)</i></b> |                  |                         |               |               |                    |
| Q5T091_HUMAN                                                                           |                  | K.VDPSLMEDSDDGPSLPTK.Q  | 2             | 3.5476        | Q5T091             |
| Q5T091_HUMAN                                                                           |                  | K.VDPSLMEDSDDGPSLPTK.Q  | 2             | 3.6236        | Q5T091             |
| Q5T091_HUMAN                                                                           |                  | K.VDPSLM*EDSDDGPSLPTK.Q | 2             | 2.9471        | Q5T091             |
| Q5T091_HUMAN                                                                           |                  | K.VDPSLM*EDSDDGPSLPTK.Q | 2             | 2.4101        | Q5T091             |
| Q5T091_HUMAN                                                                           |                  | K.VDPSLMEDSDDGPSLPTK.Q  | 2             | 3.2652        | Q5T091             |
| <b><i>Reticulon-3 - Homo sapiens (Human)</i></b>                                       |                  |                         |               |               |                    |
| RTN3_HUMAN                                                                             |                  | K.TQIDHYVGIAR.D         | 2             | 3.1943        | O95197             |
| RTN3_HUMAN                                                                             |                  | K.TQIDHYVGIAR.D         | 2             | 3.2557        | O95197             |
| <b><i>Reticulon-4 - Homo sapiens (Human)</i></b>                                       |                  |                         |               |               |                    |
| RTN4_HUMAN                                                                             |                  | R.HQAQIDHYLGLANK.N      | 3             | 4.0591        | Q9NQC3             |
| RTN4_HUMAN                                                                             |                  | R.HQAQIDHYLGLANK.N      | 2             | 3.877         | Q9NQC3             |
| RTN4_HUMAN                                                                             |                  | R.HQAQIDHYLGLANK.N      | 3             | 4.0036        | Q9NQC3             |
| RTN4_HUMAN                                                                             |                  | R.HQAQIDHYLGLANK.N      | 3             | 4.0548        | Q9NQC3             |
| RTN4_HUMAN                                                                             |                  | R.HQAQIDHYLGLANK.N      | 2             | 3.4418        | Q9NQC3             |
| RTN4_HUMAN                                                                             |                  | K.YSNSALGHVNC#TIK.E     | 2             | 3.7896        | Q9NQC3             |

| <i>Protein</i>                                                                       | <i>Reference</i> | <i>Peptide sequence</i>  | <i>Charge</i> | <i>XCorr*</i> | <i>Accession**</i> |
|--------------------------------------------------------------------------------------|------------------|--------------------------|---------------|---------------|--------------------|
|                                                                                      | RTN4_HUMAN       | R.HQAQIDHYLGLANK.N       | 2             | 3.6937        | Q9NQC3             |
| <b><i>Rho GTPase-activating protein 1 - Homo sapiens (Human)</i></b>                 |                  |                          |               |               |                    |
|                                                                                      | RHG01_HUMAN      | K.FLLDHQGELEFPSPDPSGL.-  | 2             | 2.7511        | Q07960             |
| <b><i>Rho guanine nucleotide exchange factor 1 - Homo sapiens (Human)</i></b>        |                  |                          |               |               |                    |
|                                                                                      | ARHG1_HUMAN      | R.LRPLLSQLGGNSVPQPGC#T.- | 2             | 2.4585        | Q92888             |
| <b><i>Rho-related GTP-binding protein RhoG precursor - Homo sapiens (Human)</i></b>  |                  |                          |               |               |                    |
|                                                                                      | RHOG_HUMAN       | R.LKEQGQAPITPQQGQALAK.Q  | 3             | 4.1111        | P84095             |
|                                                                                      | RHOG_HUMAN       | K.EQGQAPITPQQGQALAK.Q    | 2             | 2.4269        | P84095             |
|                                                                                      | RHOG_HUMAN       | K.EQGQAPITPQQGQALAK.Q    | 2             | 2.5243        | P84095             |
| <b><i>Ribonuclease inhibitor - Homo sapiens (Human)</i></b>                          |                  |                          |               |               |                    |
|                                                                                      | RINI_HUMAN       | R.ELC#QGLGQPGSVLR.V      | 2             | 2.5383        | P13489             |
|                                                                                      | RINI_HUMAN       | R.ELC#QGLGQPGSVLR.V      | 2             | 2.7461        | P13489             |
| <b><i>RNA adenosine deaminase - Homo sapiens (Human)</i></b>                         |                  |                          |               |               |                    |
|                                                                                      | Q86XN4_HUMAN     | R.FLYAQLELYLNNK.E        | 2             | 2.3876        | Q86XN4             |
|                                                                                      | Q86XN4_HUMAN     | R.FLYAQLELYLNNK.E        | 2             | 2.3589        | Q86XN4             |
| <b><i>RRP5 protein homolog - Homo sapiens (Human)</i></b>                            |                  |                          |               |               |                    |
|                                                                                      | RRP5_HUMAN       | K.KGKAINIGQLVDVK.V       | 2             | 2.4508        | Q14690             |
| <b><i>SAC domain-containing protein 3 - Homo sapiens (Human)</i></b>                 |                  |                          |               |               |                    |
|                                                                                      | SAC3_HUMAN       | -.M*PTAAAPIISSVQK.L      | 2             | 2.3636        | Q92562             |
| <b><i>SAM domain and HD domain-containing protein 1 - Homo sapiens (Human)</i></b>   |                  |                          |               |               |                    |
|                                                                                      | SAMH1_HUMAN      | K.EWNDSTSVQNPTR.L        | 2             | 3.0779        | Q9Y3Z3             |
|                                                                                      | SAMH1_HUMAN      | R.NFTKPQDGDVIAPLITPQK.K  | 2             | 2.4901        | Q9Y3Z3             |
|                                                                                      | SAMH1_HUMAN      | K.VGNIIDTMITDAFLK.A      | 2             | 3.2595        | Q9Y3Z3             |
|                                                                                      | SAMH1_HUMAN      | K.EWNDSTSVQNPTR.L        | 2             | 2.9805        | Q9Y3Z3             |
|                                                                                      | SAMH1_HUMAN      | K.VGNIIDTMITDAFLK.A      | 2             | 3.6995        | Q9Y3Z3             |
|                                                                                      | SAMH1_HUMAN      | K.YVGETQPTGQIK.I         | 2             | 2.4376        | Q9Y3Z3             |
|                                                                                      | SAMH1_HUMAN      | K.EWNDSTSVQNPTR.L        | 2             | 3.1863        | Q9Y3Z3             |
|                                                                                      | SAMH1_HUMAN      | K.EWNDSTSVQNPTR.L        | 2             | 2.8884        | Q9Y3Z3             |
| <b><i>Secretory carrier-associated membrane protein 3 - Homo sapiens (Human)</i></b> |                  |                          |               |               |                    |
|                                                                                      | SCAM3_HUMAN      | K.AQQEFAAGVFSNPAVR.T     | 2             | 2.7414        | O14828             |
| <b><i>Sialic acid-binding Ig-like lectin 7 precursor - Homo sapiens (Human)</i></b>  |                  |                          |               |               |                    |
|                                                                                      | SIGL7_HUMAN      | K.APVATNPAWAVQEETR.D     | 2             | 4.0756        | Q9Y286             |
| <b><i>Sialic acid-binding Ig-like lectin 9 precursor - Homo sapiens (Human)</i></b>  |                  |                          |               |               |                    |
|                                                                                      | SIGL9_HUMAN      | R.PAAGVGDTGIEDANAVR.G    | 2             | 3.5569        | Q9Y336             |



| <i>Protein</i>                                                                                      | <i>Reference</i>                  | <i>Peptide sequence</i> | <i>Charge</i> | <i>XCorr*</i> | <i>Accession**</i> |
|-----------------------------------------------------------------------------------------------------|-----------------------------------|-------------------------|---------------|---------------|--------------------|
| SIGL9_HUMAN                                                                                         | R.EGANTDQDAPVATNNPAR.A            |                         | 2             | 3.324         | Q9Y336             |
| SIGL9_HUMAN                                                                                         | R.EGANTDQDAPVATNNPAR.A            |                         | 2             | 2.5592        | Q9Y336             |
| SIGL9_HUMAN                                                                                         | R.EGANTDQDAPVATNNPAR.A            |                         | 2             | 2.7113        | Q9Y336             |
| SIGL9_HUMAN                                                                                         | R.PAAGVGDGTGIEDANAVR.G            |                         | 2             | 3.495         | Q9Y336             |
| <b><i>Sideroflexin-1 - Homo sapiens (Human)</i></b>                                                 |                                   |                         |               |               |                    |
| SFXN1_HUMAN                                                                                         | R.NILLTNEQLESAR.K                 |                         | 2             | 3.0843        | Q9H9B4             |
| <b><i>Signal peptidase complex catalytic subunit SEC11A - Homo sapiens (Human)</i></b>              |                                   |                         |               |               |                    |
| SC11A_HUMAN                                                                                         | R.GFVPYIGIVTILMNDYPK.F            |                         | 2             | 2.7355        | P67812             |
| <b><i>Signal recognition particle receptor subunit beta - Homo sapiens (Human)</i></b>              |                                   |                         |               |               |                    |
| SRPRB_HUMAN                                                                                         | R.SAAPSTLDSSTAPAQLGK.K            |                         | 2             | 2.5044        | Q9Y5M8             |
| SRPRB_HUMAN                                                                                         | R.SAAPSTLDSSTAPAQLGK.K            |                         | 2             | 3.0953        | Q9Y5M8             |
| SRPRB_HUMAN                                                                                         | R.AIVFVVDAAAFQR.E                 |                         | 2             | 2.401         | Q9Y5M8             |
| SRPRB_HUMAN                                                                                         | R.SAAPSTLDSSTAPAQLGK.K            |                         | 2             | 4.2563        | Q9Y5M8             |
| <b><i>Similar to ribosomal protein L18; 60S ribosomal protein L18 - Homo sapiens (Human)</i></b>    |                                   |                         |               |               |                    |
| A4D0W6_HUMAN                                                                                        | K.NLTFDQLALDSPK.V                 |                         | 2             | 3.069         | A4D0W6             |
| <b><i>Sodium/potassium-transporting ATPase subunit alpha-1 precursor - Homo sapiens (Human)</i></b> |                                   |                         |               |               |                    |
| AT1A1_HUMAN                                                                                         | K.VDNSSLTGESEPQTR.S               |                         | 2             | 2.8133        | P05023             |
| AT1A1_HUMAN                                                                                         | K.GVGIISEGNETVEDIAAR.L            |                         | 2             | 3.2532        | P05023             |
| <b><i>Sodium/potassium-transporting ATPase subunit beta-3 - Homo sapiens (Human)</i></b>            |                                   |                         |               |               |                    |
| AT1B3_HUMAN                                                                                         | K.LFIYNPTTGEFLGR.T                |                         | 2             | 3.4942        | P54709             |
| AT1B3_HUMAN                                                                                         | K.LFIYNPTTGEFLGR.T                |                         | 2             | 2.8453        | P54709             |
| AT1B3_HUMAN                                                                                         | K.LFIYNPTTGEFLGR.T                |                         | 2             | 3.0578        | P54709             |
| AT1B3_HUMAN                                                                                         | K.LFIYNPTTGEFLGR.T                |                         | 2             | 2.5496        | P54709             |
| <b><i>Solute carrier family 22 member 11 - Homo sapiens (Human)</i></b>                             |                                   |                         |               |               |                    |
| OAT4_HUMAN                                                                                          | R.INGHKEAKNLTIEVLMSSVK.E          |                         | 2             | 2.383         | Q9NSA0             |
| <b><i>Solute carrier family 25 member 24. - Homo sapiens (Human)</i></b>                            |                                   |                         |               |               |                    |
| Q6NUK1_HUMAN                                                                                        | R.QLLAGGIAGAVSR.T                 |                         | 2             | 3.8477        | Q6NUK1             |
| Q6NUK1_HUMAN                                                                                        | R.QLLAGGIAGAVSR.T                 |                         | 2             | 2.6163        | Q6NUK1             |
| Q6NUK1_HUMAN                                                                                        | R.QLLAGGIAGAVSR.T                 |                         | 2             | 3.0839        | Q6NUK1             |
| <b><i>Sorting nexin-7 - Homo sapiens (Human)</i></b>                                                |                                   |                         |               |               |                    |
| SNX7_HUMAN                                                                                          | R.MSGLSEALLPVVHEYVLYSEM*LMGVMKR.R |                         | 3             | 3.7526        | Q9UNH6             |
| <b><i>Structural maintenance of chromosomes protein 3 - Homo sapiens (Human)</i></b>                |                                   |                         |               |               |                    |
| SMC3_HUMAN                                                                                          | K.KM*VTKNDVMNLLSAGFSR.S           |                         | 2             | 2.4367        | Q9UQE7             |
| <b><i>Sulfide:quinone oxidoreductase, mitochondrial precursor - Homo sapiens (Human)</i></b>        |                                   |                         |               |               |                    |

| <i>Protein</i>                                                    | <i>Reference</i> | <i>Peptide sequence</i> | <i>Charge</i> | <i>XCorr*</i> | <i>Accession**</i> |
|-------------------------------------------------------------------|------------------|-------------------------|---------------|---------------|--------------------|
|                                                                   | SQRD_HUMAN       | K.TAAAVAAQSGILDR.T      | 2             | 3.8223        | Q9Y6N5             |
|                                                                   | SQRD_HUMAN       | K.ANIIFNTSLGAIFGVK.K    | 2             | 2.4241        | Q9Y6N5             |
|                                                                   | SQRD_HUMAN       | K.ADLMPFLYWNMLLR.G      | 2             | 3.2642        | Q9Y6N5             |
|                                                                   | SQRD_HUMAN       | K.TAAAVAAQSGILDR.T      | 2             | 3.3695        | Q9Y6N5             |
|                                                                   | SQRD_HUMAN       | K.EGNAIFTFPNTPVK.C      | 2             | 2.959         | Q9Y6N5             |
|                                                                   | SQRD_HUMAN       | K.EGNAIFTFPNTPVK.C      | 2             | 2.5298        | Q9Y6N5             |
|                                                                   | SQRD_HUMAN       | K.IMYLSEAYFR.K          | 2             | 2.4918        | Q9Y6N5             |
|                                                                   | SQRD_HUMAN       | K.YADALQEIIQER.N        | 2             | 3.3993        | Q9Y6N5             |
|                                                                   | SQRD_HUMAN       | K.VGAENVAIVEPSE.H       | 2             | 2.9343        | Q9Y6N5             |
|                                                                   | SQRD_HUMAN       | K.TAAAVAAQSGILDR.T      | 2             | 3.0484        | Q9Y6N5             |
|                                                                   | SQRD_HUMAN       | K.YADALQEIIQER.N        | 2             | 3.6877        | Q9Y6N5             |
|                                                                   | SQRD_HUMAN       | K.YADALQEIIQER.N        | 2             | 2.4687        | Q9Y6N5             |
|                                                                   | SQRD_HUMAN       | K.YADALQEIIQER.N        | 2             | 3.3043        | Q9Y6N5             |
|                                                                   | SQRD_HUMAN       | R.KVGAENVAIVEPSE.H      | 2             | 2.3123        | Q9Y6N5             |
|                                                                   | SQRD_HUMAN       | R.KVGAENVAIVEPSE.H      | 2             | 2.3346        | Q9Y6N5             |
|                                                                   | SQRD_HUMAN       | K.EGNAIFTFPNTPVK.C      | 2             | 2.7891        | Q9Y6N5             |
|                                                                   | SQRD_HUMAN       | R.HFYQPIWTLVGAGAK.Q     | 2             | 2.8874        | Q9Y6N5             |
|                                                                   | SQRD_HUMAN       | R.HFYQPIWTLVGAGAK.Q     | 2             | 2.9018        | Q9Y6N5             |
| <b><i>Surfeit locus protein 1 - Homo sapiens (Human)</i></b>      |                  |                         |               |               |                    |
|                                                                   | SURF1_HUMAN      | K.LNLIAELESR.V          | 2             | 2.5107        | Q15526             |
| <b><i>Synaptogyrin-1 - Homo sapiens (Human)</i></b>               |                  |                         |               |               |                    |
|                                                                   | SNG1_HUMAN       | K.AGGAFDPYTLVR.Q        | 2             | 2.3263        | O43759             |
| <b><i>Synaptogyrin-2 - Homo sapiens (Human)</i></b>               |                  |                         |               |               |                    |
|                                                                   | SNG2_HUMAN       | K.DVLVGADSVR.A          | 2             | 2.364         | O43760             |
| <b><i>Synaptophysin-like protein 1 - Homo sapiens (Human)</i></b> |                  |                         |               |               |                    |
|                                                                   | SYPL1_HUMAN      | K.TVTATFGYPFR.L         | 2             | 2.3664        | Q16563             |
| <b><i>Syntaxin-7 - Homo sapiens (Human)</i></b>                   |                  |                         |               |               |                    |
|                                                                   | STX7_HUMAN       | K.ITQC#SVEIQR.T         | 2             | 2.4811        | O15400             |
|                                                                   | STX7_HUMAN       | R.LVAEFTTSLTNFQK.V      | 2             | 2.6768        | O15400             |
|                                                                   | STX7_HUMAN       | K.ITQC#SVEIQR.T         | 2             | 2.7161        | O15400             |
|                                                                   | STX7_HUMAN       | R.TLNQLGTPQDSPELR.Q     | 2             | 2.3593        | O15400             |
|                                                                   | STX7_HUMAN       | R.LVAEFTTSLTNFQK.V      | 2             | 2.508         | O15400             |
|                                                                   | STX7_HUMAN       | R.LVAEFTTSLTNFQK.V      | 2             | 3.1107        | O15400             |
| <b><i>Tapasin precursor - Homo sapiens (Human)</i></b>            |                  |                         |               |               |                    |
|                                                                   | TPSN_HUMAN       | K.WASGLTPAQNC#PR.A      | 2             | 2.8969        | O15533             |

| <i>Protein</i>                                                                              | <i>Reference</i> | <i>Peptide sequence</i>        | <i>Charge</i> | <i>XCorr*</i> | <i>Accession**</i> |
|---------------------------------------------------------------------------------------------|------------------|--------------------------------|---------------|---------------|--------------------|
|                                                                                             | TPSN_HUMAN       | K.WASGLTPAQNC#PR.A             | 2             | 2.9556        | O15533             |
|                                                                                             | TPSN_HUMAN       | K.WASGLTPAQNC#PR.A             | 2             | 3.3483        | O15533             |
|                                                                                             | TPSN_HUMAN       | K.WASGLTPAQNC#PR.A             | 2             | 2.8735        | O15533             |
| <b><i>T-cell surface glycoprotein CD1a precursor - Homo sapiens (Human)</i></b>             |                  |                                |               |               |                    |
|                                                                                             | CD1A_HUMAN       | R.FILGLLDAGKAHLQR.Q            | 2             | 2.9632        | P06126             |
| <b><i>T-complex protein 1 subunit delta - Homo sapiens (Human)</i></b>                      |                  |                                |               |               |                    |
|                                                                                             | TCPD_HUMAN       | K.IGLIQFC#LSAPK.T              | 2             | 2.7222        | P50991             |
|                                                                                             | TCPD_HUMAN       | R.DALSDLALHFLNK.M              | 2             | 3.3397        | P50991             |
| <b><i>Thromboxane A synthase 1 - Homo sapiens (Human)</i></b>                               |                  |                                |               |               |                    |
|                                                                                             | Q53F23_HUMAN     | R.FQAC#PETQVPLQLESK.S          | 2             | 2.8436        | Q53F23             |
| <b><i>Thromboxane synthase - Homo sapiens (Human)</i></b>                                   |                  |                                |               |               |                    |
|                                                                                             | Q16843_HUMAN     | R.YAESGDAFDIQR.C               | 2             | 3.5721        | Q16843             |
|                                                                                             | Q16843_HUMAN     | R.YAESGDAFDIQR.C               | 2             | 2.3701        | Q16843             |
|                                                                                             | Q16843_HUMAN     | K.PSPFIGNLTFFR.Q               | 2             | 2.6019        | Q16843             |
|                                                                                             | Q16843_HUMAN     | R.MFIVISEPDMIK.Q               | 2             | 2.3918        | Q16843             |
| <b><i>Translocator protein - Homo sapiens (Human)</i></b>                                   |                  |                                |               |               |                    |
|                                                                                             | TSPO_HUMAN       | R.FVHGEGLR.W                   | 2             | 2.4388        | P30536             |
|                                                                                             | TSPO_HUMAN       | K.AVVPLGLYTGQLALNWAWPPIFFGAR.Q | 2             | 2.9049        | P30536             |
| <b><i>Translocon-associated protein subunit alpha precursor - Homo sapiens (Human)</i></b>  |                  |                                |               |               |                    |
|                                                                                             | SSRA_HUMAN       | K.GEDFPANNIVK.F                | 2             | 2.5849        | P43307             |
| <b><i>Translocon-associated protein subunit delta precursor - Homo sapiens (Human)</i></b>  |                  |                                |               |               |                    |
|                                                                                             | SSRD_HUMAN       | R.VQNMALYADVGGK.Q              | 2             | 2.7726        | P51571             |
|                                                                                             | SSRD_HUMAN       | R.FFDEESYSLLR.K                | 2             | 2.9253        | P51571             |
|                                                                                             | SSRD_HUMAN       | R.FFDEESYSLLR.K                | 2             | 3.0536        | P51571             |
|                                                                                             | SSRD_HUMAN       | R.FFDEESYSLLR.K                | 2             | 3.0703        | P51571             |
|                                                                                             | SSRD_HUMAN       | R.FFDEESYSLLR.K                | 2             | 3.1083        | P51571             |
|                                                                                             | SSRD_HUMAN       | R.FFDEESYSLLR.K                | 2             | 3.0943        | P51571             |
|                                                                                             | SSRD_HUMAN       | R.VQNMALYADVGGK.Q              | 2             | 3.3553        | P51571             |
|                                                                                             | SSRD_HUMAN       | R.FFDEESYSLLR.K                | 2             | 2.4746        | P51571             |
| <b><i>Translocon-associated protein subunit gamma - Homo sapiens (Human)</i></b>            |                  |                                |               |               |                    |
|                                                                                             | SSRG_HUMAN       | K.QQSEEDLLLQDFSR.N             | 2             | 2.5379        | Q9UNL2             |
|                                                                                             | SSRG_HUMAN       | K.QQSEEDLLLQDFSR.N             | 2             | 2.9348        | Q9UNL2             |
|                                                                                             | SSRG_HUMAN       | K.QQSEEDLLLQDFSR.N             | 2             | 2.41          | Q9UNL2             |
| <b><i>Transmembrane 9 superfamily protein member 3 precursor - Homo sapiens (Human)</i></b> |                  |                                |               |               |                    |

| <i>Protein</i>                                                                                  | <i>Reference</i> | <i>Peptide sequence</i> | <i>Charge</i> | <i>XCorr*</i> | <i>Accession**</i> |
|-------------------------------------------------------------------------------------------------|------------------|-------------------------|---------------|---------------|--------------------|
|                                                                                                 | TM9S3_HUMAN      | R.NLSGQPNFPC#R.V        | 2             | 2.7794        | Q9HD45             |
|                                                                                                 | TM9S3_HUMAN      | R.NLSGQPNFPC#R.V        | 2             | 2.7978        | Q9HD45             |
|                                                                                                 | TM9S3_HUMAN      | R.NLSGQPNFPC#R.V        | 2             | 2.558         | Q9HD45             |
| <b><i>Transmembrane and coiled-coil domain-containing protein 1 - Homo sapiens (Human)</i></b>  |                  |                         |               |               |                    |
|                                                                                                 | TMCO1_HUMAN      | K.LPFTPLSYIQGLSHR.N     | 3             | 4.2222        | Q9UM00             |
| <b><i>Transmembrane emp24 domain-containing protein 1 precursor - Homo sapiens (Human)</i></b>  |                  |                         |               |               |                    |
|                                                                                                 | TMED1_HUMAN      | R.SIQMLTLLR.A           | 2             | 2.3077        | Q13445             |
| <b><i>Transmembrane emp24 domain-containing protein 10 precursor - Homo sapiens (Human)</i></b> |                  |                         |               |               |                    |
|                                                                                                 | TMEDA_HUMAN      | R.IPDQLVILDMK.H         | 2             | 2.9262        | P49755             |
|                                                                                                 | TMEDA_HUMAN      | R.IPDQLVILDMK.H         | 2             | 2.8589        | P49755             |
|                                                                                                 | TMEDA_HUMAN      | R.IPDQLVILDMK.H         | 2             | 2.5427        | P49755             |
|                                                                                                 | TMEDA_HUMAN      | R.RLEDLSESIVNDFAYMK.K   | 2             | 2.4268        | P49755             |
|                                                                                                 | TMEDA_HUMAN      | R.IPDQLVILDMK.H         | 2             | 2.4224        | P49755             |
|                                                                                                 | TMEDA_HUMAN      | R.RLEDLSESIVNDFAYMK.K   | 2             | 4.2595        | P49755             |
|                                                                                                 | TMEDA_HUMAN      | R.RLEDLSESIVNDFAYMK.K   | 2             | 3.7101        | P49755             |
| <b><i>Transmembrane emp24 domain-containing protein 2 precursor - Homo sapiens (Human)</i></b>  |                  |                         |               |               |                    |
|                                                                                                 | TMED2_HUMAN      | K.IVMFTIDIGEAPK.G       | 2             | 2.733         | Q15363             |
|                                                                                                 | TMED2_HUMAN      | K.IVMFTIDIGEAPK.G       | 2             | 2.5482        | Q15363             |
| <b><i>Transmembrane emp24 domain-containing protein 9 precursor - Homo sapiens (Human)</i></b>  |                  |                         |               |               |                    |
|                                                                                                 | TMED9_HUMAN      | K.DKLSSELQLR.V          | 2             | 2.315         | Q9BVK6             |
|                                                                                                 | TMED9_HUMAN      | R.QLVEQVEIQK.E          | 2             | 2.8735        | Q9BVK6             |
|                                                                                                 | TMED9_HUMAN      | R.QLVEQVEIQK.E          | 2             | 3.0789        | Q9BVK6             |
| <b><i>Transmembrane protein 109 precursor - Homo sapiens (Human)</i></b>                        |                  |                         |               |               |                    |
|                                                                                                 | TM109_HUMAN      | R.EAPVDVLTQIGR.S        | 2             | 2.505         | Q9BVC6             |
|                                                                                                 | TM109_HUMAN      | R.EAPVDVLTQIGR.S        | 2             | 2.8243        | Q9BVC6             |
| <b><i>Transmembrane protein 167 precursor - Homo sapiens (Human)</i></b>                        |                  |                         |               |               |                    |
|                                                                                                 | TM167_HUMAN      | K.TGLLGIFWK.C           | 2             | 2.3385        | Q8TBQ9             |
| <b><i>Transmembrane protein 16E - Homo sapiens (Human)</i></b>                                  |                  |                         |               |               |                    |
|                                                                                                 | TM16E_HUMAN      | K.FLLAWMIPDVPK.D        | 2             | 2.6298        | Q75V66             |
|                                                                                                 | TM16E_HUMAN      | K.FLLAWMIPDVPK.D        | 2             | 2.3513        | Q75V66             |
| <b><i>Transmembrane protein 33 - Homo sapiens (Human)</i></b>                                   |                  |                         |               |               |                    |
|                                                                                                 | TMM33_HUMAN      | R.ALLANALTSALR.L        | 2             | 3.5783        | P57088             |
|                                                                                                 | TMM33_HUMAN      | R.ALLANALTSALR.L        | 2             | 3.8143        | P57088             |
|                                                                                                 | TMM33_HUMAN      | R.ALLANALTSALR.L        | 2             | 3.1314        | P57088             |

| <i>Protein</i>                                                                                   | <i>Reference</i> | <i>Peptide sequence</i>                | <i>Charge</i> | <i>XCorr*</i> | <i>Accession**</i> |
|--------------------------------------------------------------------------------------------------|------------------|----------------------------------------|---------------|---------------|--------------------|
|                                                                                                  | TMM33_HUMAN      | R.SVLDKLSANQQNILK.F                    | 2             | 4.1993        | P57088             |
|                                                                                                  | TMM33_HUMAN      | R.SVLDKLSANQQNILK.F                    | 2             | 2.6638        | P57088             |
| <b><i>Transmembrane protein 43 - Homo sapiens (Human)</i></b>                                    |                  |                                        |               |               |                    |
|                                                                                                  | TMM43_HUMAN      | R.FFLSSGLIDKVDNFK.S                    | 2             | 3.3431        | Q9BTV4             |
| <b><i>Transporter 1, ATP-binding cassette, sub-family B - Homo sapiens (Human)</i></b>           |                  |                                        |               |               |                    |
|                                                                                                  | Q96CP4_HUMAN     | R.IFSLLVPTALPLLR.V                     | 2             | 2.34          | Q96CP4             |
| <b><i>Trifunctional enzyme subunit alpha, mitochondrial precursor - Homo sapiens (Human)</i></b> |                  |                                        |               |               |                    |
|                                                                                                  | ECHA_HUMAN       | K.TGIEQGS DAGYLC#ESQK.F                | 2             | 2.6909        | P40939             |
|                                                                                                  | ECHA_HUMAN       | K.TLQEVTQLS QEAQR.I                    | 2             | 2.4831        | P40939             |
|                                                                                                  | ECHA_HUMAN       | R.FGGGNPELLTQM VSK.G                   | 2             | 2.7753        | P40939             |
|                                                                                                  | ECHA_HUMAN       | R.FGGGNPELLTQM VSK.G                   | 2             | 2.5008        | P40939             |
| <b><i>Tubulin alpha-1A chain - Homo sapiens (Human)</i></b>                                      |                  |                                        |               |               |                    |
|                                                                                                  | TBA1A_HUMAN      | K.DVNAAIATIK.T                         | 2             | 2.8774        | Q71U36             |
|                                                                                                  | TBA1A_HUMAN      | K.TIGGGD DSFN TFFSETGAGK.H             | 2             | 3.0804        | Q71U36             |
|                                                                                                  | TBA1A_HUMAN      | K.TIGGGD DSFN TFFSETGAGK.H             | 2             | 4.2575        | Q71U36             |
|                                                                                                  | TBA1A_HUMAN      | R.GHYTIGKEIIDLVLDR.I                   | 2             | 3.0361        | Q71U36             |
|                                                                                                  | TBA1A_HUMAN      | K.LADQC#TGLQGFLVFH SFGGGTGSGFTSLLMER.L | 3             | 4.2029        | Q71U36             |
|                                                                                                  | TBA1A_HUMAN      | R.GHYTIGKEIIDLVLDR.I                   | 2             | 3.6793        | Q71U36             |
|                                                                                                  | TBA1A_HUMAN      | K.DVNAAIATIK.T                         | 2             | 2.5342        | Q71U36             |
|                                                                                                  | TBA1A_HUMAN      | R.NLDIERPTYTNLNR.L                     | 2             | 2.5339        | Q71U36             |
|                                                                                                  | TBA1A_HUMAN      | R.LDHKFDL MYAK.R                       | 3             | 4.1124        | Q71U36             |
|                                                                                                  | TBA1A_HUMAN      | K.EIIDLVLDR.I                          | 1             | 2.1598        | Q71U36             |
|                                                                                                  | TBA1A_HUMAN      | R.NLDIERPTYTNLNR.L                     | 2             | 2.5406        | Q71U36             |
|                                                                                                  | TBA1A_HUMAN      | R.NLDIERPTYTNLNR.L                     | 2             | 2.6403        | Q71U36             |
|                                                                                                  | TBA1A_HUMAN      | R.GHYTIGKEIIDLVLDR.I                   | 2             | 2.4964        | Q71U36             |
|                                                                                                  | TBA1A_HUMAN      | K.LADQC#TGLQGFLVFH SFGGGTGSGFTSLLMER.L | 3             | 5.7302        | Q71U36             |
|                                                                                                  | TBA1A_HUMAN      | K.LADQC#TGLQGFLVFH SFGGGTGSGFTSLLMER.L | 3             | 5.7818        | Q71U36             |
| <b><i>Tubulin alpha-1B chain - Homo sapiens (Human)</i></b>                                      |                  |                                        |               |               |                    |
|                                                                                                  | TBA1B_HUMAN      | R.SIQFVDWC#PTGFK.V                     | 2             | 3.2419        | P68363             |
|                                                                                                  | TBA1B_HUMAN      | R.SIQFVDWC#PTGFK.V                     | 2             | 2.5547        | P68363             |
|                                                                                                  | TBA1B_HUMAN      | R.LISQIVSSITASLR.F                     | 2             | 2.9277        | P68363             |
|                                                                                                  | TBA1B_HUMAN      | R.LISQIVSSITASLR.F                     | 2             | 3.1178        | P68363             |
|                                                                                                  | TBA1B_HUMAN      | R.LISQIVSSITASLR.F                     | 2             | 2.4457        | P68363             |
|                                                                                                  | TBA1B_HUMAN      | R.SIQFVDWC#PTGFK.V                     | 2             | 2.8995        | P68363             |
|                                                                                                  | TBA1B_HUMAN      | R.LISQIVSSITASLR.F                     | 2             | 3.6917        | P68363             |

| <i>Protein</i>                                             | <i>Reference</i> | <i>Peptide sequence</i> | <i>Charge</i> | <i>XCorr*</i> | <i>Accession**</i> |
|------------------------------------------------------------|------------------|-------------------------|---------------|---------------|--------------------|
| <b><i>Tubulin beta chain - Homo sapiens (Human)</i></b>    |                  |                         |               |               |                    |
| TBB5_HUMAN                                                 |                  | K.MAVTFIGNSTAIQELFKR.I  | 2             | 3.9085        | P07437             |
| TBB5_HUMAN                                                 |                  | R.ALTVPELTQQVFDAK.N     | 2             | 2.3794        | P07437             |
| <b><i>Tubulin beta-1 chain - Homo sapiens (Human)</i></b>  |                  |                         |               |               |                    |
| TBB1_HUMAN                                                 |                  | K.LAVNMVPPFR.L          | 2             | 3.5196        | Q9H4B7             |
| TBB1_HUMAN                                                 |                  | K.LAVNMVPPFR.L          | 2             | 3.2563        | Q9H4B7             |
| TBB1_HUMAN                                                 |                  | R.FPGQLNADLR.K          | 2             | 2.6215        | Q9H4B7             |
| TBB1_HUMAN                                                 |                  | K.LAVNM*VPPFR.L         | 2             | 2.3953        | Q9H4B7             |
| TBB1_HUMAN                                                 |                  | K.LAVNMVPPFR.L          | 2             | 3.0207        | Q9H4B7             |
| TBB1_HUMAN                                                 |                  | K.LAVNMVPPFR.L          | 2             | 3.38          | Q9H4B7             |
| <b><i>Tubulin beta-2A chain - Homo sapiens (Human)</i></b> |                  |                         |               |               |                    |
| TBB2A_HUMAN                                                |                  | K.NMMAAC#DPR.H          | 2             | 2.5448        | Q13885             |
| TBB2A_HUMAN                                                |                  | K.EVDEQMLNVQNK.N        | 2             | 3.5294        | Q13885             |
| TBB2A_HUMAN                                                |                  | R.ISEQFTAM*FR.R         | 2             | 2.9367        | Q13885             |
| TBB2A_HUMAN                                                |                  | R.ISEQFTAMFR.R          | 2             | 2.9926        | Q13885             |
| TBB2A_HUMAN                                                |                  | R.LHFFM*PGFAPLTSR.G     | 2             | 2.9558        | Q13885             |
| TBB2A_HUMAN                                                |                  | K.NSSYFVEWIPNNVK.T      | 2             | 2.7399        | Q13885             |
| TBB2A_HUMAN                                                |                  | R.LHFFMPGFAPLTSR.G      | 3             | 3.8886        | Q13885             |
| TBB2A_HUMAN                                                |                  | R.LHFFMPGFAPLTSR.G      | 2             | 3.0999        | Q13885             |
| TBB2A_HUMAN                                                |                  | K.EVDEQMLNVQNK.N        | 2             | 3.3251        | Q13885             |
| TBB2A_HUMAN                                                |                  | K.EVDEQMLNVQNK.N        | 2             | 2.8856        | Q13885             |
| TBB2A_HUMAN                                                |                  | R.ISEQFTAM*FR.R         | 2             | 2.7492        | Q13885             |
| TBB2A_HUMAN                                                |                  | R.ISEQFTAMFR.R          | 2             | 2.7948        | Q13885             |
| TBB2A_HUMAN                                                |                  | K.NSSYFVEWIPNNVK.T      | 2             | 4.0956        | Q13885             |
| TBB2A_HUMAN                                                |                  | K.NSSYFVEWIPNNVK.T      | 2             | 2.5243        | Q13885             |
| TBB2A_HUMAN                                                |                  | R.LHFFMPGFAPLTSR.G      | 2             | 2.7723        | Q13885             |
| TBB2A_HUMAN                                                |                  | K.EVDEQMLNVQNK.N        | 2             | 3.4385        | Q13885             |
| TBB2A_HUMAN                                                |                  | R.ISEQFTAM*FR.R         | 2             | 2.7082        | Q13885             |
| TBB2A_HUMAN                                                |                  | R.ISEQFTAMFR.R          | 2             | 3.2069        | Q13885             |
| TBB2A_HUMAN                                                |                  | K.NSSYFVEWIPNNVK.T      | 2             | 3.3443        | Q13885             |
| TBB2A_HUMAN                                                |                  | R.LHFFMPGFAPLTSR.G      | 2             | 2.8836        | Q13885             |
| TBB2A_HUMAN                                                |                  | K.NMMAAC#DPR.H          | 2             | 2.3165        | Q13885             |
| TBB2A_HUMAN                                                |                  | K.NMMAAC#DPR.H          | 2             | 2.5119        | Q13885             |
| TBB2A_HUMAN                                                |                  | K.EVDEQMLNVQNK.N        | 2             | 3.1691        | Q13885             |
| TBB2A_HUMAN                                                |                  | R.ISEQFTAM*FR.R         | 2             | 2.7247        | Q13885             |

| <i>Protein</i>                                                                                            | <i>Reference</i> | <i>Peptide sequence</i>              | <i>Charge</i> | <i>XCorr*</i> | <i>Accession**</i> |
|-----------------------------------------------------------------------------------------------------------|------------------|--------------------------------------|---------------|---------------|--------------------|
| TBB2A_HUMAN                                                                                               |                  | R.ISEQFTAMFR.R                       | 2             | 2.4334        | Q13885             |
| TBB2A_HUMAN                                                                                               |                  | K.NSSYFVEWIPNNVK.T                   | 2             | 3.5737        | Q13885             |
| TBB2A_HUMAN                                                                                               |                  | R.LHFFMPGFAPLTSR.G                   | 2             | 2.5683        | Q13885             |
| TBB2A_HUMAN                                                                                               |                  | R.LHFFMPGFAPLTSR.G                   | 2             | 4.0923        | Q13885             |
| TBB2A_HUMAN                                                                                               |                  | R.LHFFMPGFAPLTSR.G                   | 2             | 2.6894        | Q13885             |
| <b><i>Tubulin beta-2C chain - Homo sapiens (Human)</i></b>                                                |                  |                                      |               |               |                    |
| TBB2C_HUMAN                                                                                               |                  | R.IMNTFSVVPSPK.V                     | 2             | 2.8355        | P68371             |
| TBB2C_HUMAN                                                                                               |                  | R.YLTVAAVFR.G                        | 2             | 2.3067        | P68371             |
| TBB2C_HUMAN                                                                                               |                  | R.YLTVAAVFR.G                        | 2             | 2.346         | P68371             |
| TBB2C_HUMAN                                                                                               |                  | R.ALTVPELTQQMFDAK.N                  | 2             | 2.38          | P68371             |
| TBB2C_HUMAN                                                                                               |                  | R.YLTVAAVFR.G                        | 2             | 2.9921        | P68371             |
| <b><i>Tubulin beta-3 chain - Homo sapiens (Human)</i></b>                                                 |                  |                                      |               |               |                    |
| TBB3_HUMAN                                                                                                |                  | K.ECENCDC#LQGFQLTHSLGGGTGSGMGTLISK.V | 3             | 4.5146        | Q13509             |
| <b><i>Type-1 angiotensin II receptor-associated protein - Homo sapiens (Human)</i></b>                    |                  |                                      |               |               |                    |
| ATRAP_HUMAN                                                                                               |                  | R.SAYQTIDSAEAPADPFVPEGR.S            | 2             | 2.7816        | Q6RW13             |
| <b><i>Tyrosine-protein kinase HCK - Homo sapiens (Human)</i></b>                                          |                  |                                      |               |               |                    |
| HCK_HUMAN                                                                                                 |                  | R.VIEDNEYTAR.E                       | 2             | 2.3339        | P08631             |
| <b><i>Tyrosine-protein kinase SYK - Homo sapiens (Human)</i></b>                                          |                  |                                      |               |               |                    |
| KSYK_HUMAN                                                                                                |                  | K.KFDTLWQLVEHYSYK.A                  | 3             | 3.941         | P43405             |
| <b><i>Tyrosine-protein phosphatase non-receptor type 6 - Homo sapiens (Human)</i></b>                     |                  |                                      |               |               |                    |
| PTN6_HUMAN                                                                                                |                  | K.GLDC#DIDIQK.T                      | 2             | 2.6299        | P29350             |
| <b><i>Ubiquinol-cytochrome-c reductase complex core protein 2, mitochondrial precursor - Homo sap</i></b> |                  |                                      |               |               |                    |
| UQCR2_HUMAN                                                                                               |                  | K.TIAQGNLSNTDVQAAK.N                 | 2             | 3.0025        | P22695             |
| <b><i>Ubiquitin - Homo sapiens (Human)</i></b>                                                            |                  |                                      |               |               |                    |
| UBIQ_HUMAN                                                                                                |                  | K.ESTLHLVLR.L                        | 2             | 2.7939        | P62988             |
| UBIQ_HUMAN                                                                                                |                  | K.TITLEVEPSDTIENVK.A                 | 2             | 3.565         | P62988             |
| UBIQ_HUMAN                                                                                                |                  | K.TITLEVEPSDTIENVK.A                 | 2             | 3.854         | P62988             |
| UBIQ_HUMAN                                                                                                |                  | K.TITLEVEPSDTIENVK.A                 | 2             | 2.9731        | P62988             |
| <b><i>Unc-112-related protein 2 - Homo sapiens (Human)</i></b>                                            |                  |                                      |               |               |                    |
| URP2_HUMAN                                                                                                |                  | R.TMADSSYTSEVQAILAFLSLQR.T           | 2             | 3.4665        | Q86UX7             |
| URP2_HUMAN                                                                                                |                  | R.TGSGGPGNHPHPDASAEGLNPYGLVAPR.F     | 3             | 3.9501        | Q86UX7             |
| URP2_HUMAN                                                                                                |                  | R.LTQLYEQAR.W                        | 2             | 2.5207        | Q86UX7             |
| URP2_HUMAN                                                                                                |                  | K.SQDEAPGDPIQQLNLK.G                 | 2             | 2.8915        | Q86UX7             |
| URP2_HUMAN                                                                                                |                  | R.TMADSSYTSEVQAILAFLSLQR.T           | 2             | 2.7158        | Q86UX7             |

| <i>Protein</i>                                                                                        | <i>Reference</i> | <i>Peptide sequence</i> | <i>Charge</i> | <i>XCorr*</i> | <i>Accession**</i> |
|-------------------------------------------------------------------------------------------------------|------------------|-------------------------|---------------|---------------|--------------------|
| <b><i>UNC93 homolog B1 - Homo sapiens (Human)</i></b>                                                 |                  |                         |               |               |                    |
|                                                                                                       | UN93B_HUMAN      | R.SVGWGNIFQLPFK.H       | 2             | 2.3946        | Q9H1C4             |
|                                                                                                       | UN93B_HUMAN      | R.RPC#PYEQAQGGDGPEEQ.-  | 2             | 3.0312        | Q9H1C4             |
| <b><i>Uncharacterized protein C12orf51 - Homo sapiens (Human)</i></b>                                 |                  |                         |               |               |                    |
|                                                                                                       | CL051_HUMAN      | K.LVLTEGERNSGLSQLR.D    | 2             | 2.3799        | Q3MJD5             |
| <b><i>UPF0404 protein C11orf59 - Homo sapiens (Human)</i></b>                                         |                  |                         |               |               |                    |
|                                                                                                       | CK059_HUMAN      | R.TDEQALLSSILAK.T       | 2             | 3.8165        | Q6IAA8             |
|                                                                                                       | CK059_HUMAN      | R.TDEQALLSSILAK.T       | 2             | 2.3937        | Q6IAA8             |
|                                                                                                       | CK059_HUMAN      | R.TDEQALLSSILAK.T       | 2             | 2.9718        | Q6IAA8             |
| <b><i>Vacuolar ATP synthase 16 kDa proteolipid subunit - Homo sapiens (Human)</i></b>                 |                  |                         |               |               |                    |
|                                                                                                       | VATL_HUMAN       | K.SGTGIAAMSVMRPEQIMK.S  | 2             | 3.6451        | P27449             |
|                                                                                                       | VATL_HUMAN       | K.SGTGIAAMSVMRPEQIMK.S  | 2             | 3.0026        | P27449             |
|                                                                                                       | VATL_HUMAN       | K.SGTGIAAMSVMRPEQIMK.S  | 2             | 2.7081        | P27449             |
| <b><i>Vacuolar proton translocating ATPase 116 kDa subunit a isoform 1 - Homo sapiens (Human)</i></b> |                  |                         |               |               |                    |
|                                                                                                       | VPP1_HUMAN       | R.ASLYPC#PETPQER.K      | 2             | 2.3075        | Q93050             |
| <b><i>Vesicle-associated membrane protein 8 - Homo sapiens (Human)</i></b>                            |                  |                         |               |               |                    |
|                                                                                                       | VAMP8_HUMAN      | R.NKTEDLEATSEHFK.T      | 3             | 3.7696        | Q9BV40             |
|                                                                                                       | VAMP8_HUMAN      | R.NKTEDLEATSEHFK.T      | 3             | 4.1858        | Q9BV40             |
| <b><i>Vesicle-fusing ATPase - Homo sapiens (Human)</i></b>                                            |                  |                         |               |               |                    |
|                                                                                                       | NSF_HUMAN        | R.FSNLVLQALLVLLK.K      | 2             | 3.6152        | P46459             |
|                                                                                                       | NSF_HUMAN        | R.FSNLVLQALLVLLK.K      | 3             | 3.8939        | P46459             |
|                                                                                                       | NSF_HUMAN        | R.FSNLVLQALLVLLK.K      | 2             | 3.6699        | P46459             |
| <b><i>Vesicle-trafficking protein SEC22b - Homo sapiens (Human)</i></b>                               |                  |                         |               |               |                    |
|                                                                                                       | SC22B_HUMAN      | K.ANNLSSLK.K            | 2             | 2.3345        | O75396             |
|                                                                                                       | SC22B_HUMAN      | R.GEALSALDSK.A          | 2             | 2.7533        | O75396             |
|                                                                                                       | SC22B_HUMAN      | R.NLGSINTELQDVQR.I      | 2             | 3.0841        | O75396             |
| <b><i>Vesicular integral-membrane protein VIP36 precursor - Homo sapiens (Human)</i></b>              |                  |                         |               |               |                    |
|                                                                                                       | LMAN2_HUMAN      | K.DNVDDPTGNFR.S         | 2             | 3.0461        | Q12907             |
|                                                                                                       | LMAN2_HUMAN      | K.DNVDDPTGNFR.S         | 2             | 2.7499        | Q12907             |
|                                                                                                       | LMAN2_HUMAN      | K.DNVDDPTGNFR.S         | 2             | 3.0687        | Q12907             |
|                                                                                                       | LMAN2_HUMAN      | K.DNVDDPTGNFR.S         | 2             | 2.8584        | Q12907             |
| <b><i>Vimentin - Homo sapiens (Human)</i></b>                                                         |                  |                         |               |               |                    |
|                                                                                                       | VIME_HUMAN       | K.FADLSEAANR.N          | 2             | 3.5557        | P08670             |
|                                                                                                       | VIME_HUMAN       | R.SLYASSPGGVYATR.S      | 2             | 3.2086        | P08670             |



| <i>Protein</i> | <i>Reference</i> | <i>Peptide sequence</i> | <i>Charge</i> | <i>XCorr*</i> | <i>Accession**</i> |
|----------------|------------------|-------------------------|---------------|---------------|--------------------|
| VIME_HUMAN     |                  | K.FADLSEAANR.N          | 2             | 2.6552        | P08670             |
| VIME_HUMAN     |                  | R.SLYASSPGGVYATR.S      | 2             | 2.9691        | P08670             |
| VIME_HUMAN     |                  | R.QVQSLTC#EVDALK.G      | 2             | 2.8193        | P08670             |
| VIME_HUMAN     |                  | R.QDVDNASLAR.L          | 2             | 2.5796        | P08670             |
| VIME_HUMAN     |                  | K.FADLSEAANR.N          | 2             | 3.5152        | P08670             |
| VIME_HUMAN     |                  | R.SLYASSPGGVYATR.S      | 2             | 3.1671        | P08670             |
| VIME_HUMAN     |                  | R.SLYASSPGGVYATR.S      | 2             | 2.6251        | P08670             |
| VIME_HUMAN     |                  | R.LGDLYEEEMR.E          | 2             | 2.4666        | P08670             |
| VIME_HUMAN     |                  | K.FADLSEAANR.N          | 2             | 2.739         | P08670             |
| VIME_HUMAN     |                  | R.SLYASSPGGVYATR.S      | 2             | 3.1368        | P08670             |
| VIME_HUMAN     |                  | R.LGDLYEEEMR.E          | 2             | 2.3076        | P08670             |
| VIME_HUMAN     |                  | R.QVQSLTC#EVDALK.G      | 2             | 2.9191        | P08670             |
| VIME_HUMAN     |                  | R.TYSLGSALRPSTSR.S      | 2             | 2.3714        | P08670             |
| VIME_HUMAN     |                  | R.KVESLQEEIAFLK.K       | 2             | 3.3233        | P08670             |

***Voltage-dependent anion channel 2 - Homo sapiens (Human)***

|              |  |                    |   |        |        |
|--------------|--|--------------------|---|--------|--------|
| Q5JSD1_HUMAN |  | R.PMC#IPPSYADLGK.A | 2 | 2.3078 | Q5JSD1 |
|--------------|--|--------------------|---|--------|--------|

***Voltage-dependent anion-selective channel protein 1 - Homo sapiens (Human)***

|             |  |                         |   |        |        |
|-------------|--|-------------------------|---|--------|--------|
| VDAC1_HUMAN |  | R.VTQSNFAVGYK.T         | 2 | 2.4296 | P21796 |
| VDAC1_HUMAN |  | R.VTQSNFAVGYK.T         | 2 | 2.6489 | P21796 |
| VDAC1_HUMAN |  | K.YQIDPDAC#FSAK.V       | 2 | 2.68   | P21796 |
| VDAC1_HUMAN |  | K.VNNSLIGLGYTQTLKPGIK.L | 2 | 2.3844 | P21796 |
| VDAC1_HUMAN |  | K.YQIDPDAC#FSAK.V       | 2 | 3.0888 | P21796 |
| VDAC1_HUMAN |  | K.WNTDNTLGTEITVEDQLAR.G | 2 | 2.454  | P21796 |
| VDAC1_HUMAN |  | R.VTQSNFAVGYK.T         | 2 | 2.419  | P21796 |
| VDAC1_HUMAN |  | K.LTFDSSFSPNTGK.K       | 2 | 3.7633 | P21796 |
| VDAC1_HUMAN |  | K.LTFDSSFSPNTGK.K       | 2 | 2.6129 | P21796 |
| VDAC1_HUMAN |  | K.SENGLEFTSSGSANTETTK.V | 2 | 3.327  | P21796 |
| VDAC1_HUMAN |  | K.SENGLEFTSSGSANTETTK.V | 2 | 3.1667 | P21796 |
| VDAC1_HUMAN |  | K.VNNSLIGLGYTQTLKPGIK.L | 2 | 2.4867 | P21796 |
| VDAC1_HUMAN |  | K.WNTDNTLGTEITVEDQLAR.G | 2 | 4.2515 | P21796 |

***Voltage-dependent anion-selective channel protein 2 - Homo sapiens (Human)***

|             |  |                         |   |        |        |
|-------------|--|-------------------------|---|--------|--------|
| VDAC2_HUMAN |  | K.VNNSLIGVGYTQTLRPGVK.L | 2 | 2.6529 | P45880 |
| VDAC2_HUMAN |  | K.VNNSLIGVGYTQTLRPGVK.L | 2 | 3.0911 | P45880 |
| VDAC2_HUMAN |  | K.VNNSLIGVGYTQTLRPGVK.L | 3 | 4.0779 | P45880 |
| VDAC2_HUMAN |  | R.NNFAVGYR.T            | 2 | 2.3789 | P45880 |

| <i>Protein</i>                                                                           | <i>Reference</i> | <i>Peptide sequence</i>     | <i>Charge</i> | <i>XCorr*</i> | <i>Accession**</i> |
|------------------------------------------------------------------------------------------|------------------|-----------------------------|---------------|---------------|--------------------|
|                                                                                          | VDAC2_HUMAN      | R.TGDFQLHTNVNDGTEFGGSIYQK.V | 3             | 4.82          | P45880             |
|                                                                                          | VDAC2_HUMAN      | K.VNNSLIGVGYTQTLRPGVK.L     | 2             | 2.6781        | P45880             |
| <b><i>Voltage-dependent anion-selective channel protein 3 - Homo sapiens (Human)</i></b> |                  |                             |               |               |                    |
|                                                                                          | VDAC3_HUMAN      | K.LSQNNFALGYK.A             | 2             | 2.9668        | Q9Y277             |
|                                                                                          | VDAC3_HUMAN      | K.LTLDTIFVPNTGK.K           | 2             | 2.5733        | Q9Y277             |
|                                                                                          | VDAC3_HUMAN      | K.VNNASLIGLGYTQTLRPGVK.L    | 2             | 5.0243        | Q9Y277             |
|                                                                                          | VDAC3_HUMAN      | K.LTLDTIFVPNTGK.K           | 2             | 2.4628        | Q9Y277             |
|                                                                                          | VDAC3_HUMAN      | K.LTLDTIFVPNTGK.K           | 2             | 2.4452        | Q9Y277             |
|                                                                                          | VDAC3_HUMAN      | K.VC#NYGLTFTQK.W            | 2             | 2.7216        | Q9Y277             |
|                                                                                          | VDAC3_HUMAN      | K.VC#NYGLTFTQK.W            | 2             | 2.6627        | Q9Y277             |
|                                                                                          | VDAC3_HUMAN      | K.AADFQLHTHVNDGTEFGGSIYQK.V | 3             | 4.9122        | Q9Y277             |
|                                                                                          | VDAC3_HUMAN      | K.VNNASLIGLGYTQTLRPGVK.L    | 2             | 4.6703        | Q9Y277             |
| <b><i>WD repeat and FYVE domain-containing protein 3 - Homo sapiens (Human)</i></b>      |                  |                             |               |               |                    |
|                                                                                          | WDFY3_HUMAN      | K.GM*LKNSTAALYIDGQLVNTVK.L  | 2             | 2.5015        | Q8IZQ1             |
|                                                                                          | WDFY3_HUMAN      | K.GM*LKNSTAALYIDGQLVNTVK.L  | 2             | 2.3626        | Q8IZQ1             |
|                                                                                          | WDFY3_HUMAN      | K.GM*LKNSTAALYIDGQLVNTVK.L  | 2             | 2.4356        | Q8IZQ1             |
| <b><i>Zinc finger, CDGSH-type domain 2 - Homo sapiens (Human)</i></b>                    |                  |                             |               |               |                    |
|                                                                                          | Q8N5K1_HUMAN     | K.VVNEINIEDLC#LTK.A         | 2             | 3.7081        | Q8N5K1             |
|                                                                                          | Q8N5K1_HUMAN     | K.VVNEINIEDLC#LTK.A         | 2             | 2.491         | Q8N5K1             |
|                                                                                          | Q8N5K1_HUMAN     | K.VVNEINIEDLC#LTK.A         | 2             | 2.8317        | Q8N5K1             |
|                                                                                          | Q8N5K1_HUMAN     | K.VVNEINIEDLC#LTK.A         | 2             | 2.5035        | Q8N5K1             |
