# Supplementary material
Source: PubMed Central journal article supplement (PMC3159575)
Supplement: NIHMS146057-supplement-04.pdf [file NIHMS146057-supplement-04.pdf]

**Supplementary Table 2B****A list of 203 proteins identified by  $\geq 2$  peptides using methanol/PPS combination.**

| <i>Reference</i> <sup>a</sup> | <i>Protein</i>                                                   | <i>Acc. No.</i> <sup>b</sup> | <i>PC</i> <sup>c</sup> | <i>TMDs</i> <sup>d</sup> |
|-------------------------------|------------------------------------------------------------------|------------------------------|------------------------|--------------------------|
| 1A01_HUMAN                    | HLA class I histocompatibility antigen, A-1 alpha chain          | P30443                       | 8                      | 1                        |
| 1A25_HUMAN                    | HLA class I histocompatibility antigen, A-25 alpha chain         | P18462                       | 5                      | 1                        |
| 2B11_HUMAN                    | HLA class II histocompatibility antigen, DRB1-1 beta chain       | P04229                       | 4                      | 1                        |
| 2B18_HUMAN                    | HLA class II histocompatibility antigen, DRB1-8 beta chain       | Q30134                       | 5                      | 2                        |
| 2DRA_HUMAN                    | HLA class II histocompatibility antigen, DR alpha chain          | P01903                       | 9                      | 1                        |
| A5D8X1_HUMAN                  | Putative uncharacterized protein - Homo sapiens (Human)          | A5D8X1                       | 3                      |                          |
| ACTA_HUMAN                    | Actin, aortic smooth muscle - Homo sapiens (Human)               | P62736                       | 21                     |                          |
| ACTB_HUMAN                    | Actin, cytoplasmic 1 - Homo sapiens (Human)                      | P60709                       | 12                     |                          |
| ADT1_HUMAN                    | ADP/ATP translocase 1 - Homo sapiens (Human)                     | P12235                       | 10                     | 3                        |
| ADT2_HUMAN                    | ADP/ATP translocase 2 - Homo sapiens (Human)                     | P05141                       | 8                      | 2                        |
| ADT3_HUMAN                    | ADP/ATP translocase 3 - Homo sapiens (Human)                     | P12236                       | 6                      | 2                        |
| AL3B1_HUMAN                   | Aldehyde dehydrogenase 3B1 - Homo sapiens (Human)                | P43353                       | 2                      |                          |
| ANXA2_HUMAN                   | Annexin A2 - Homo sapiens (Human)                                | P07355                       | 30                     |                          |
| AT1A1_HUMAN                   | Sodium/potassium-transporting ATPase subunit alpha               | P05023                       | 2                      | 10                       |
| AT1B3_HUMAN                   | Sodium/potassium-transporting ATPase subunit beta                | P54709                       | 4                      | 1                        |
| AT5F1_HUMAN                   | ATP synthase B chain, mitochondrial precursor - Homo sapiens     | P24539                       | 8                      |                          |
| ATLA3_HUMAN                   | Atlastin-3 - Homo sapiens (Human)                                | Q6DD88                       | 2                      | 2                        |
| ATP5H_HUMAN                   | ATP synthase D chain, mitochondrial - Homo sapiens               | O75947                       | 2                      |                          |
| ATP5I_HUMAN                   | ATP synthase e chain, mitochondrial - Homo sapiens               | P56385                       | 8                      |                          |
| ATP6_HUMAN                    | ATP synthase a chain - Homo sapiens (Human)                      | P00846                       | 3                      | 6                        |
| ATPA_HUMAN                    | ATP synthase subunit alpha, mitochondrial precursor              | P25705                       | 2                      |                          |
| ATPB_HUMAN                    | ATP synthase subunit beta, mitochondrial precursor               | P06576                       | 2                      |                          |
| ATPG_HUMAN                    | ATP synthase gamma chain, mitochondrial precursor                | P36542                       | 3                      |                          |
| ATPK_HUMAN                    | ATP synthase f chain, mitochondrial - Homo sapiens               | P56134                       | 8                      | 1                        |
| BAP31_HUMAN                   | B-cell receptor-associated protein 31 - Homo sapiens             | P51572                       | 6                      | 3                        |
| BAXA_HUMAN                    | Apoptosis regulator BAX, membrane isoform alpha - Homo sapiens   | Q07812                       | 6                      | 1                        |
| BID_HUMAN                     | BH3-interacting domain death agonist - Homo sapiens              | P55957                       | 5                      |                          |
| BST1_HUMAN                    | ADP-ribosyl cyclase 2 precursor - Homo sapiens (Human)           | Q10588                       | 6                      | 1                        |
| CALX_HUMAN                    | Calnexin precursor - Homo sapiens (Human)                        | P27824                       | 20                     | 1                        |
| CATG_HUMAN                    | Cathepsin G precursor - Homo sapiens (Human)                     | P08311                       | 14                     |                          |
| CD14_HUMAN                    | Monocyte differentiation antigen CD14 precursor - Homo sapiens   | P08571                       | 9                      |                          |
| CD36_HUMAN                    | Platelet glycoprotein 4 - Homo sapiens (Human)                   | P16671                       | 8                      | 2                        |
| CD45_HUMAN                    | Leukocyte common antigen precursor - Homo sapiens                | P08575                       | 8                      | 2                        |
| CD97_HUMAN                    | CD97 antigen precursor - Homo sapiens (Human)                    | P48960                       | 2                      | 7                        |
| CDIPT_HUMAN                   | CDP-diacylglycerol--inositol 3-phosphatidyltransferase           | O14735                       | 2                      | 4                        |
| CK059_HUMAN                   | UPF0404 protein C11orf59 - Homo sapiens (Human)                  | Q6IAA8                       | 3                      |                          |
| CKAP4_HUMAN                   | Cytoskeleton-associated protein 4 - Homo sapiens (Human)         | Q07065                       | 19                     | 1                        |
| CKLF6_HUMAN                   | CKLF-like MARVEL transmembrane domain-containing protein         | Q9NX76                       | 3                      | 3                        |
| COPA_HUMAN                    | Coatamer subunit alpha - Homo sapiens (Human)                    | P53621                       | 4                      |                          |
| COPB_HUMAN                    | Coatamer subunit beta - Homo sapiens (Human)                     | P53618                       | 2                      |                          |
| COX2_HUMAN                    | Cytochrome c oxidase subunit 2 - Homo sapiens (Human)            | P00403                       | 8                      | 2                        |
| COX41_HUMAN                   | Cytochrome c oxidase subunit 4 isoform 1, mitochondrial          | P13073                       | 4                      | 1                        |
| COX6C_HUMAN                   | Cytochrome c oxidase polypeptide VIc precursor - Homo sapiens    | P09669                       | 3                      | 1                        |
| CPT1A_HUMAN                   | Carnitine O-palmitoyltransferase I, liver isoform - Homo sapiens | P50416                       | 2                      | 2                        |
| CX7A2_HUMAN                   | Cytochrome c oxidase polypeptide VIIa-liver/heart, mitochondrial | P14406                       | 3                      | 1                        |
| CY24A_HUMAN                   | Cytochrome b-245 light chain - Homo sapiens (Human)              | P13498                       | 6                      | 3                        |
| CY24B_HUMAN                   | Cytochrome b-245 heavy chain - Homo sapiens (Human)              | P04839                       | 24                     | 4                        |

|             |                                                           |        |    |   |
|-------------|-----------------------------------------------------------|--------|----|---|
| DAD1_HUMAN  | Dolichyl-diphosphooligosaccharide--protein glycosyltr     | P61803 | 3  | 3 |
| DHRS8_HUMAN | Dehydrogenase/reductase SDR family member 8 pre           | Q8NBQ5 | 2  |   |
| ECHA_HUMAN  | Trifunctional enzyme subunit alpha, mitochondrial pre     | P40939 | 4  |   |
| EF1A1_HUMAN | Elongation factor 1-alpha 1 - Homo sapiens (Human)        | P68104 | 6  |   |
| ELNE_HUMAN  | Leukocyte elastase precursor - Homo sapiens (Huma         | P08246 | 5  | 1 |
| ELOV1_HUMAN | Elongation of very long chain fatty acids protein 1 - H   | Q9BW60 | 2  | 7 |
| ENPL_HUMAN  | Endoplasmic precursor - Homo sapiens (Human)              | P14625 | 2  |   |
| ERD22_HUMAN | ER lumen protein retaining receptor 2 - Homo sapien       | P33947 | 3  | 4 |
| ERLN1_HUMAN | Erlin-1 precursor - Homo sapiens (Human)                  | O75477 | 3  | 1 |
| FCERG_HUMAN | High affinity immunoglobulin epsilon receptor subunit     | P30273 | 4  | 1 |
| FLNA_HUMAN  | Filamin-A - Homo sapiens (Human)                          | P21333 | 12 |   |
| GAPR1_HUMAN | Golgi-associated plant pathogenesis-related protein 1     | Q9H4G4 | 7  |   |
| GCS1_HUMAN  | Mannosyl-oligosaccharide glucosidase - Homo sapie         | Q13724 | 2  | 1 |
| GHITM_HUMAN | Growth hormone-inducible transmembrane protein - I        | Q9H3K2 | 7  | 6 |
| GIMA1_HUMAN | GTPase IMAP family member 1 - Homo sapiens (Hui           | Q8WWP7 | 5  | 1 |
| GNAI2_HUMAN | Guanine nucleotide-binding protein G(i), alpha-2 sub      | P04899 | 13 |   |
| H11_HUMAN   | Histone H1.1 - Homo sapiens (Human)                       | Q02539 | 5  |   |
| H15_HUMAN   | Histone H1.5 - Homo sapiens (Human)                       | P16401 | 4  |   |
| H2A1A_HUMAN | Histone H2A type 1-A - Homo sapiens (Human)               | Q96QV6 | 11 |   |
| H2A1B_HUMAN | Histone H2A type 1-B - Homo sapiens (Human)               | P04908 | 7  |   |
| H2A1D_HUMAN | Histone H2A type 1-D - Homo sapiens (Human)               | P20671 | 8  |   |
| H2A2A_HUMAN | Histone H2A type 2-A - Homo sapiens (Human)               | Q6F113 | 5  |   |
| H2B1B_HUMAN | Histone H2B type 1-B - Homo sapiens (Human)               | P33778 | 33 |   |
| H2B1C_HUMAN | Histone H2B type 1-C/E/F/G/I - Homo sapiens (Huma         | P62807 | 5  |   |
| H2B2C_HUMAN | Histone H2B type 2-C - Homo sapiens (Human)               | Q6DN03 | 9  |   |
| H31T_HUMAN  | Histone H3.1t - Homo sapiens (Human)                      | Q16695 | 5  |   |
| H4_HUMAN    | Histone H4 - Homo sapiens (Human)                         | P62805 | 34 |   |
| HB2K_HUMAN  | HLA class II histocompatibility antigen, DR-W53 beta      | P13762 | 4  | 1 |
| HG2A_HUMAN  | HLA class II histocompatibility antigen gamma chain       | P04233 | 3  | 1 |
| HNRPK_HUMAN | Heterogeneous nuclear ribonucleoprotein K - Homo s        | P61978 | 2  |   |
| HXK1_HUMAN  | Hexokinase-1 - Homo sapiens (Human)                       | P19367 | 3  |   |
| HXK3_HUMAN  | Hexokinase-3 - Homo sapiens (Human)                       | P52790 | 9  |   |
| IF3A_HUMAN  | Eukaryotic translation initiation factor 3 subunit 10 - F | Q14152 | 2  |   |
| IF4A1_HUMAN | Eukaryotic initiation factor 4A-I - Homo sapiens (Hum     | P60842 | 6  |   |
| IFM1_HUMAN  | Interferon-induced transmembrane protein 1 - Homo         | P13164 | 3  | 2 |
| ILEU_HUMAN  | Leukocyte elastase inhibitor - Homo sapiens (Human)       | P30740 | 5  |   |
| IQGA1_HUMAN | Ras GTPase-activating-like protein IQGAP1 - Homo s        | P46940 | 6  |   |
| ITA2B_HUMAN | Integrin alpha-IIb precursor - Homo sapiens (Human)       | P08514 | 12 | 1 |
| ITAM_HUMAN  | Integrin alpha-M precursor - Homo sapiens (Human)         | P11215 | 17 | 1 |
| ITB2_HUMAN  | Integrin beta-2 precursor - Homo sapiens (Human)          | P05107 | 30 | 1 |
| ITB3_HUMAN  | Integrin beta-3 precursor - Homo sapiens (Human)          | P05106 | 4  | 1 |
| KCD12_HUMAN | BTB/POZ domain-containing protein KCTD12 - Homoc          | Q96CX2 | 2  |   |
| LBR_HUMAN   | Lamin-B receptor - Homo sapiens (Human)                   | Q14739 | 5  | 8 |
| LIRB1_HUMAN | Leukocyte immunoglobulin-like receptor subfamily B        | Q8NHL6 | 2  | 1 |
| LMAN2_HUMAN | Vesicular integral-membrane protein VIP36 precursor       | Q12907 | 4  | 1 |
| LMNB1_HUMAN | Lamin-B1 - Homo sapiens (Human)                           | P20700 | 2  |   |
| LYRIC_HUMAN | Protein LYRIC - Homo sapiens (Human)                      | Q86UE4 | 2  | 1 |
| LYSC_HUMAN  | Lysozyme C precursor - Homo sapiens (Human)               | P61626 | 37 |   |
| MCEM1_HUMAN | Mast cell-expressed membrane protein 1 - Homo sap         | Q8IX19 | 5  | 1 |
| MET7A_HUMAN | Methyltransferase-like protein 7A precursor - Homo s      | Q9H8H3 | 7  | 1 |
| MGST1_HUMAN | Microsomal glutathione S-transferase 1 - Homo sapie       | P10620 | 9  | 1 |

|              |                                                                                 |        |    |    |
|--------------|---------------------------------------------------------------------------------|--------|----|----|
| MGST3_HUMAN  | Microsomal glutathione S-transferase 3 - Homo sapiens                           | O14880 | 10 | 4  |
| MNDA_HUMAN   | Myeloid cell nuclear differentiation antigen - Homo sapiens                     | P41218 | 5  |    |
| MPCP_HUMAN   | Phosphate carrier protein, mitochondrial precursor - Homo sapiens               | Q00325 | 10 | 2  |
| MPRD_HUMAN   | Cation-dependent mannose-6-phosphate receptor precursor - Homo sapiens          | P20645 | 2  | 1  |
| MPU1_HUMAN   | Mannose-P-dolichol utilization defect 1 protein - Homo sapiens                  | O75352 | 3  | 5  |
| MTCH2_HUMAN  | Mitochondrial carrier homolog 2 - Homo sapiens (Human)                          | Q9Y6C9 | 2  |    |
| MYH10_HUMAN  | Myosin-10 - Homo sapiens (Human)                                                | P35580 | 4  |    |
| MYH11_HUMAN  | Myosin-11 - Homo sapiens (Human)                                                | P35749 | 6  |    |
| MYH9_HUMAN   | Myosin-9 - Homo sapiens (Human)                                                 | P35579 | 32 |    |
| NB5R3_HUMAN  | NADH-cytochrome b5 reductase 3 - Homo sapiens (Human)                           | P00387 | 4  |    |
| NCF2_HUMAN   | Neutrophil cytosol factor 2 - Homo sapiens (Human)                              | P19878 | 2  |    |
| NDUA4_HUMAN  | NADH dehydrogenase [ubiquinone] 1 alpha subcomplex 4 - Homo sapiens             | O00483 | 4  | 1  |
| NDUA9_HUMAN  | NADH dehydrogenase [ubiquinone] 1 alpha subcomplex 9 - Homo sapiens             | Q16795 | 2  |    |
| NDUBA_HUMAN  | NADH dehydrogenase [ubiquinone] 1 beta subcomplex 4 - Homo sapiens              | O96000 | 2  |    |
| NSF_HUMAN    | Vesicle-fusing ATPase - Homo sapiens (Human)                                    | P46459 | 3  |    |
| NU4M_HUMAN   | NADH-ubiquinone oxidoreductase chain 4 - Homo sapiens                           | P03905 | 2  | 10 |
| P53_HUMAN    | Cellular tumor antigen p53 - Homo sapiens (Human)                               | P04637 | 5  |    |
| PCBP1_HUMAN  | Poly(rC)-binding protein 1 - Homo sapiens (Human)                               | Q15365 | 8  |    |
| PCBP2_HUMAN  | Poly(rC)-binding protein 2 - Homo sapiens (Human)                               | Q15366 | 4  |    |
| PERM_HUMAN   | Myeloperoxidase precursor - Homo sapiens (Human)                                | P05164 | 19 |    |
| PGRC2_HUMAN  | Membrane-associated progesterone receptor component 2 - Homo sapiens            | O15173 | 3  | 1  |
| PHB_HUMAN    | Prohibitin - Homo sapiens (Human)                                               | P35232 | 6  |    |
| PHB2_HUMAN   | Prohibitin-2 - Homo sapiens (Human)                                             | Q99623 | 13 |    |
| PLP2_HUMAN   | Proteolipid protein 2 - Homo sapiens (Human)                                    | Q04941 | 3  | 4  |
| PLSL_HUMAN   | Plastin-2 - Homo sapiens (Human)                                                | P13796 | 9  |    |
| PO210_HUMAN  | Nuclear pore membrane glycoprotein 210 precursor - Homo sapiens                 | Q8TEM1 | 13 | 2  |
| PRAF3_HUMAN  | PRA1 family protein 3 - Homo sapiens (Human)                                    | O75915 | 2  | 3  |
| PRTN3_HUMAN  | Myeloblastin precursor - Homo sapiens (Human)                                   | P24158 | 4  |    |
| PSME2_HUMAN  | Proteasome activator complex subunit 2 - Homo sapiens                           | Q9UL46 | 3  |    |
| Q16843_HUMAN | Thromboxane synthase - Homo sapiens (Human)                                     | Q16843 | 4  |    |
| Q59H50_HUMAN | Integrin beta chain, beta 2 variant - Homo sapiens (Human)                      | Q59H50 | 3  |    |
| Q5T091_HUMAN | RER1 retention in endoplasmic reticulum 1 homolog - Homo sapiens                | Q5T091 | 5  | 2  |
| Q5VWA5_HUMAN | Dolichyl-diphosphooligosaccharide-protein glycosyltransferase 1 - Homo sapiens  | Q5VWA5 | 5  | 2  |
| Q6NUK1_HUMAN | Solute carrier family 25 member 24 - Homo sapiens                               | Q6NUK1 | 3  |    |
| Q6UW11_HUMAN | ATWD578 - Homo sapiens (Human)                                                  | Q6UW11 | 6  | 3  |
| Q6ZNK5_HUMAN | Myosin-IG - Homo sapiens (Human)                                                | Q6ZNK5 | 8  |    |
| Q86TV4_HUMAN | Full-length cDNA clone CS0DI085YI08 of Placenta of Homo sapiens                 | Q86TV4 | 2  |    |
| Q86XN4_HUMAN | RNA adenosine deaminase - Homo sapiens (Human)                                  | Q86XN4 | 2  |    |
| Q8N5K1_HUMAN | Zinc finger, CDGSH-type domain 2 - Homo sapiens (Human)                         | Q8N5K1 | 4  | 1  |
| Q9NRP0_HUMAN | DC2 - Homo sapiens (Human)                                                      | Q9NRP0 | 4  | 3  |
| RAB10_HUMAN  | Ras-related protein Rab-10 - Homo sapiens (Human)                               | P61026 | 2  |    |
| RAB3D_HUMAN  | Ras-related protein Rab-3D - Homo sapiens (Human)                               | O95716 | 4  |    |
| RAB5C_HUMAN  | Ras-related protein Rab-5C - Homo sapiens (Human)                               | P51148 | 6  |    |
| RAC1_HUMAN   | Ras-related C3 botulinum toxin substrate 1 precursor - Homo sapiens             | P63000 | 4  |    |
| RAP1A_HUMAN  | Ras-related protein Rap-1A precursor - Homo sapiens                             | P62834 | 5  |    |
| REEP5_HUMAN  | Receptor expression-enhancing protein 5 - Homo sapiens                          | Q00765 | 3  | 2  |
| RHOG_HUMAN   | Rho-related GTP-binding protein RhoG precursor - Homo sapiens                   | P84095 | 3  |    |
| RIB1_HUMAN   | Dolichyl-diphosphooligosaccharide--protein glycosyltransferase 1 - Homo sapiens | P04843 | 5  | 1  |
| RINI_HUMAN   | Ribonuclease inhibitor - Homo sapiens (Human)                                   | P13489 | 2  |    |
| RL13_HUMAN   | 60S ribosomal protein L13 - Homo sapiens (Human)                                | P26373 | 2  |    |
| RL14_HUMAN   | 60S ribosomal protein L14 - Homo sapiens (Human)                                | P50914 | 8  |    |

|             |                                                                  |        |    |    |
|-------------|------------------------------------------------------------------|--------|----|----|
| RL18_HUMAN  | 60S ribosomal protein L18 - Homo sapiens (Human)                 | Q07020 | 5  |    |
| RL18A_HUMAN | 60S ribosomal protein L18a - Homo sapiens (Human)                | Q02543 | 4  |    |
| RL24_HUMAN  | 60S ribosomal protein L24 - Homo sapiens (Human)                 | P83731 | 2  |    |
| RL6_HUMAN   | 60S ribosomal protein L6 - Homo sapiens (Human)                  | Q02878 | 4  |    |
| RL7_HUMAN   | 60S ribosomal protein L7 - Homo sapiens (Human)                  | P18124 | 6  |    |
| RL7A_HUMAN  | 60S ribosomal protein L7a - Homo sapiens (Human)                 | P62424 | 4  |    |
| RL9_HUMAN   | 60S ribosomal protein L9 - Homo sapiens (Human)                  | P32969 | 2  |    |
| RLA0_HUMAN  | 60S acidic ribosomal protein P0 - Homo sapiens (Human)           | P05388 | 4  |    |
| RS2_HUMAN   | 40S ribosomal protein S2 - Homo sapiens (Human)                  | P15880 | 2  |    |
| RS24_HUMAN  | 40S ribosomal protein S24 - Homo sapiens (Human)                 | P62847 | 7  |    |
| RS3_HUMAN   | 40S ribosomal protein S3 - Homo sapiens (Human)                  | P23396 | 4  |    |
| RS4X_HUMAN  | 40S ribosomal protein S4, X isoform - Homo sapiens               | P62701 | 2  |    |
| RTN3_HUMAN  | Reticulon-3 - Homo sapiens (Human)                               | O95197 | 2  | 3  |
| RTN4_HUMAN  | Reticulon-4 - Homo sapiens (Human)                               | Q9NQC3 | 7  | 2  |
| S10A8_HUMAN | Protein S100-A8 - Homo sapiens (Human)                           | P05109 | 5  |    |
| S10A9_HUMAN | Protein S100-A9 - Homo sapiens (Human)                           | P06702 | 3  |    |
| S61A1_HUMAN | Protein transport protein Sec61 subunit alpha isoform            | P61619 | 2  | 10 |
| SAMH1_HUMAN | SAM domain and HD domain-containing protein 1 - Homo sapiens     | Q9Y3Z3 | 8  |    |
| SC22B_HUMAN | Vesicle-trafficking protein SEC22b - Homo sapiens (Human)        | O75396 | 3  | 1  |
| SIGL9_HUMAN | Sialic acid-binding Ig-like lectin 9 precursor - Homo sapiens    | Q9Y336 | 5  | 1  |
| SQRD_HUMAN  | Sulfide:quinone oxidoreductase, mitochondrial precursor          | Q9Y6N5 | 18 |    |
| SRPRB_HUMAN | Signal recognition particle receptor subunit beta - Homo sapiens | Q9Y5M8 | 4  | 1  |
| SSRD_HUMAN  | Translocon-associated protein subunit delta precursor            | P51571 | 8  |    |
| SSRG_HUMAN  | Translocon-associated protein subunit gamma - Homo sapiens       | Q9UNL2 | 3  | 4  |
| STOM_HUMAN  | Erythrocyte band 7 integral membrane protein - Homo sapiens      | P27105 | 14 | 1  |
| STT3A_HUMAN | Dolichyl-diphosphooligosaccharide--protein glycosyltransferase 3 | P46977 | 2  | 13 |
| STT3B_HUMAN | Dolichyl-diphosphooligosaccharide--protein glycosyltransferase 3 | Q8TCJ2 | 2  | 10 |
| STX7_HUMAN  | Syntaxin-7 - Homo sapiens (Human)                                | O15400 | 6  | 1  |
| TBA1A_HUMAN | Tubulin alpha-1A chain - Homo sapiens (Human)                    | Q71U36 | 15 |    |
| TBA1B_HUMAN | Tubulin alpha-1B chain - Homo sapiens (Human)                    | P68363 | 7  |    |
| TBB1_HUMAN  | Tubulin beta-1 chain - Homo sapiens (Human)                      | Q9H4B7 | 6  |    |
| TBB2A_HUMAN | Tubulin beta-2A chain - Homo sapiens (Human)                     | Q13885 | 29 |    |
| TBB2C_HUMAN | Tubulin beta-2C chain - Homo sapiens (Human)                     | P68371 | 5  |    |
| TBB5_HUMAN  | Tubulin beta chain - Homo sapiens (Human)                        | P07437 | 2  |    |
| TCPD_HUMAN  | T-complex protein 1 subunit delta - Homo sapiens (Human)         | P50991 | 2  |    |
| TM109_HUMAN | Transmembrane protein 109 precursor - Homo sapiens (Human)       | Q9BVC6 | 2  | 5  |
| TM16E_HUMAN | Transmembrane protein 16E - Homo sapiens (Human)                 | Q75V66 | 2  | 8  |
| TM9S3_HUMAN | Transmembrane 9 superfamily protein member 3 precursor           | Q9HD45 | 3  | 9  |
| TMED2_HUMAN | Transmembrane emp24 domain-containing protein 2                  | Q15363 | 2  | 2  |
| TMED9_HUMAN | Transmembrane emp24 domain-containing protein 9                  | Q9BVK6 | 3  | 1  |
| TMEDA_HUMAN | Transmembrane emp24 domain-containing protein 10                 | P49755 | 7  | 2  |
| TMM33_HUMAN | Transmembrane protein 33 - Homo sapiens (Human)                  | P57088 | 5  | 3  |
| TPSN_HUMAN  | Tapasin precursor - Homo sapiens (Human)                         | O15533 | 4  | 1  |
| TSPO_HUMAN  | Translocator protein - Homo sapiens (Human)                      | P30536 | 2  | 5  |
| UBIQ_HUMAN  | Ubiquitin - Homo sapiens (Human)                                 | P62988 | 4  |    |
| UN93B_HUMAN | UNC93 homolog B1 - Homo sapiens (Human)                          | Q9H1C4 | 2  | 12 |
| URP2_HUMAN  | Unc-112-related protein 2 - Homo sapiens (Human)                 | Q86UX7 | 5  |    |
| VAMP8_HUMAN | Vesicle-associated membrane protein 8 - Homo sapiens (Human)     | Q9BV40 | 2  | 1  |
| VATL_HUMAN  | Vacuolar ATP synthase 16 kDa proteolipid subunit - Homo sapiens  | P27449 | 3  | 4  |
| VDAC1_HUMAN | Voltage-dependent anion-selective channel protein 1              | P21796 | 13 |    |
| VDAC2_HUMAN | Voltage-dependent anion-selective channel protein 2              | P45880 | 6  |    |

|             |                                                     |        |    |
|-------------|-----------------------------------------------------|--------|----|
| VDAC3_HUMAN | Voltage-dependent anion-selective channel protein 3 | Q9Y277 | 9  |
| VIME_HUMAN  | Vimentin - Homo sapiens (Human)                     | P08670 | 16 |
| WDFY3_HUMAN | WD repeat and FYVE domain-containing protein 3 - l  | Q8IZQ1 | 3  |

<sup>a</sup> Reference in the UniProtKB human database, release 07/09.

<sup>b</sup> Accession number in the UniProtKB human database, release 07/09.

<sup>c</sup> Peptide count for a given protein.

<sup>d</sup> A number of alpha-helical transmembrane domains mapped by TMHMM for a given protein.
