# Supplementary material
Source: PubMed Central journal article supplement (PMC3159575)
Supplement: NIHMS146057-supplement-05.pdf [file NIHMS146057-supplement-05.pdf]

**Supplementary Table 3A**

A list of 1,370 peptides identified using PPS-based approach, sorted by protein name.

MS/MS spectra were searched against the UniProt Human proteomic database; release 09/07.

\* SEQUEST Xcorr observed for an identified peptide; \*\* Human database accession number.

| <i>Protein</i>                                                                    | <i>Reference</i> | <i>Peptide sequence</i> | <i>Charge</i> | <i>XCorr*</i> | <i>Accession**</i> |
|-----------------------------------------------------------------------------------|------------------|-------------------------|---------------|---------------|--------------------|
| <b><i>14-3-3 protein beta/alpha - Homo sapiens (Human)</i></b>                    |                  |                         |               |               |                    |
|                                                                                   | 1433B_HUMAN      | K.IEAELQDIC#NDVLELLDK.Y | 2             | 2.4548        | P31946             |
|                                                                                   | 1433B_HUMAN      | K.IEAELQDIC#NDVLELLDK.Y | 2             | 3.0147        | P31946             |
|                                                                                   | 1433B_HUMAN      | K.IEAELQDIC#NDVLELLDK.Y | 2             | 4.3961        | P31946             |
|                                                                                   | 1433B_HUMAN      | K.TAFDEAIAELDTLNEESYK.D | 2             | 5.4745        | P31946             |
| <b><i>14-3-3 protein epsilon - Homo sapiens (Human)</i></b>                       |                  |                         |               |               |                    |
|                                                                                   | 1433E_HUMAN      | K.AAFDDAIAELDTLSEESYK.D | 2             | 3.9297        | P62258             |
|                                                                                   | 1433E_HUMAN      | K.AAFDDAIAELDTLSEESYK.D | 2             | 2.4262        | P62258             |
| <b><i>14-3-3 protein gamma - Homo sapiens (Human)</i></b>                         |                  |                         |               |               |                    |
|                                                                                   | 1433G_HUMAN      | K.NVTELNEPLSNEER.N      | 2             | 2.6397        | P61981             |
| <b><i>14-3-3 protein zeta/delta - Homo sapiens (Human)</i></b>                    |                  |                         |               |               |                    |
|                                                                                   | 1433Z_HUMAN      | R.DIC#NDVLSLLEK.F       | 2             | 2.7905        | P63104             |
|                                                                                   | 1433Z_HUMAN      | K.TAFDEAIAELDTLSEESYK.D | 2             | 2.7409        | P63104             |
|                                                                                   | 1433Z_HUMAN      | K.GIVDQSQQAYQEAFEISK.K  | 2             | 3.5216        | P63104             |
|                                                                                   | 1433Z_HUMAN      | K.SVTEQGAELSNEER.N      | 2             | 3.9548        | P63104             |
|                                                                                   | 1433Z_HUMAN      | R.DIC#NDVLSLLEK.F       | 2             | 2.6152        | P63104             |
|                                                                                   | 1433Z_HUMAN      | K.TAFDEAIAELDTLSEESYK.D | 3             | 4.2294        | P63104             |
|                                                                                   | 1433Z_HUMAN      | K.SVTEQGAELSNEER.N      | 2             | 3.677         | P63104             |
|                                                                                   | 1433Z_HUMAN      | K.GIVDQSQQAYQEAFEISK.K  | 2             | 4.74          | P63104             |
|                                                                                   | 1433Z_HUMAN      | K.SVTEQGAELSNEER.N      | 2             | 3.8013        | P63104             |
|                                                                                   | 1433Z_HUMAN      | R.DIC#NDVLSLLEK.F       | 2             | 2.8059        | P63104             |
|                                                                                   | 1433Z_HUMAN      | K.SVTEQGAELSNEER.N      | 2             | 3.9712        | P63104             |
|                                                                                   | 1433Z_HUMAN      | R.DIC#NDVLSLLEK.F       | 2             | 3.0121        | P63104             |
| <b><i>2',3'-cyclic-nucleotide 3'-phosphodiesterase - Homo sapiens (Human)</i></b> |                  |                         |               |               |                    |
|                                                                                   | CN37_HUMAN       | K.APGAE EYAQQDVLK.K     | 2             | 3.5784        | P09543             |
|                                                                                   | CN37_HUMAN       | K.APGAE EYAQQDVLK.K     | 2             | 3.2862        | P09543             |
| <b><i>40S ribosomal protein S11 - Homo sapiens (Human)</i></b>                    |                  |                         |               |               |                    |
|                                                                                   | RS11_HUMAN       | R.DVQIGDIVTVGEC#RPLSK.T | 2             | 4.3733        | P62280             |
|                                                                                   | RS11_HUMAN       | R.DVQIGDIVTVGEC#RPLSK.T | 2             | 2.4041        | P62280             |
| <b><i>40S ribosomal protein S14 - Homo sapiens (Human)</i></b>                    |                  |                         |               |               |                    |

| <i>Protein</i>                                                                   | <i>Reference</i> | <i>Peptide sequence</i>    | <i>Charge</i> | <i>XCorr*</i> | <i>Accession**</i> |
|----------------------------------------------------------------------------------|------------------|----------------------------|---------------|---------------|--------------------|
|                                                                                  | RS14_HUMAN       | R.IEDVTPIPSDSTR.R          | 2             | 2.801         | P62263             |
|                                                                                  | RS14_HUMAN       | R.IEDVTPIPSDSTR.R          | 2             | 2.8174        | P62263             |
|                                                                                  | RS14_HUMAN       | K.TPGPGAQSALR.A            | 2             | 2.3556        | P62263             |
| <b><i>40S ribosomal protein S15 - Homo sapiens (Human)</i></b>                   |                  |                            |               |               |                    |
|                                                                                  | RS15_HUMAN       | R.GVDLDQLLDMSYEQLMQLYSAR.Q | 2             | 3.7298        | P62841             |
| <b><i>40S ribosomal protein S18 - Homo sapiens (Human)</i></b>                   |                  |                            |               |               |                    |
|                                                                                  | RS18_HUMAN       | K.IPDWFLNR.Q               | 2             | 2.7426        | P62269             |
|                                                                                  | RS18_HUMAN       | K.IPDWFLNR.Q               | 2             | 2.329         | P62269             |
|                                                                                  | RS18_HUMAN       | R.AGELTEDEVER.V            | 2             | 2.3231        | P62269             |
| <b><i>40S ribosomal protein S20 - Homo sapiens (Human)</i></b>                   |                  |                            |               |               |                    |
|                                                                                  | RS20_HUMAN       | K.TPVEPEVAIHR.I            | 3             | 3.9431        | P60866             |
| <b><i>40S ribosomal protein S3 - Homo sapiens (Human)</i></b>                    |                  |                            |               |               |                    |
|                                                                                  | RS3_HUMAN        | R.ELAEDGYSGVEVR.V          | 2             | 2.8917        | P23396             |
|                                                                                  | RS3_HUMAN        | K.GGKPEPPAMPQPVPPTA.-      | 2             | 2.6316        | P23396             |
|                                                                                  | RS3_HUMAN        | K.GGKPEPPAM*PQPVPPTA.-     | 2             | 2.4171        | P23396             |
|                                                                                  | RS3_HUMAN        | K.DEILPTTPISEQK.G          | 2             | 2.4715        | P23396             |
|                                                                                  | RS3_HUMAN        | K.KPLPDHVSIVEPK.D          | 3             | 3.884         | P23396             |
|                                                                                  | RS3_HUMAN        | K.GGKPEPPAMPQPVPPTA.-      | 2             | 2.9793        | P23396             |
|                                                                                  | RS3_HUMAN        | R.ELAEDGYSGVEVR.V          | 2             | 2.9833        | P23396             |
|                                                                                  | RS3_HUMAN        | R.ELAEDGYSGVEVR.V          | 2             | 2.876         | P23396             |
| <b><i>40S ribosomal protein S4, X isoform - Homo sapiens (Human)</i></b>         |                  |                            |               |               |                    |
|                                                                                  | RS4X_HUMAN       | R.HPGSFDVVHVK.D            | 3             | 3.9371        | P62701             |
|                                                                                  | RS4X_HUMAN       | K.VNDTIQIDLETGK.I          | 2             | 2.8603        | P62701             |
|                                                                                  | RS4X_HUMAN       | R.HPGSFDVVHVK.D            | 3             | 4.2664        | P62701             |
|                                                                                  | RS4X_HUMAN       | R.HPGSFDVVHVK.D            | 3             | 4.3937        | P62701             |
|                                                                                  | RS4X_HUMAN       | K.VNDTIQIDLETGK.I          | 2             | 2.5507        | P62701             |
| <b><i>40S ribosomal protein S5 - Homo sapiens (Human)</i></b>                    |                  |                            |               |               |                    |
|                                                                                  | RS5_HUMAN        | K.TIAEC#LADELINAAK.G       | 2             | 4.0408        | P46782             |
|                                                                                  | RS5_HUMAN        | K.TIAEC#LADELINAAK.G       | 2             | 5.5156        | P46782             |
|                                                                                  | RS5_HUMAN        | K.TIAEC#LADELINAAK.G       | 2             | 2.8323        | P46782             |
| <b><i>4-trimethylaminobutyraldehyde dehydrogenase - Homo sapiens (Human)</i></b> |                  |                            |               |               |                    |
|                                                                                  | AL9A1_HUMAN      | K.SGMERCRIILAAAR.I         | 2             | 2.317         | P49189             |
| <b><i>5-azacytidine-induced protein 1 - Homo sapiens (Human)</i></b>             |                  |                            |               |               |                    |
|                                                                                  | AZI1_HUMAN       | K.ETEKALSRQLQR.Q           | 1             | 2.325         | Q9UPN4             |

| <i>Protein</i>                                                                          | <i>Reference</i> | <i>Peptide sequence</i> | <i>Charge</i> | <i>XCorr*</i> | <i>Accession**</i> |
|-----------------------------------------------------------------------------------------|------------------|-------------------------|---------------|---------------|--------------------|
| <b><i>60 kDa heat shock protein, mitochondrial precursor - Homo sapiens (Human)</i></b> |                  |                         |               |               |                    |
|                                                                                         | CH60_HUMAN       | K.TLNDELEIIEGMK.F       | 2             | 3.2207        | P10809             |
| <b><i>60S ribosomal protein L11 - Homo sapiens (Human)</i></b>                          |                  |                         |               |               |                    |
|                                                                                         | RL11_HUMAN       | K.VLEQLTGQTPVFSK.A      | 2             | 3.2699        | P62913             |
|                                                                                         | RL11_HUMAN       | K.VLEQLTGQTPVFSK.A      | 2             | 2.3965        | P62913             |
|                                                                                         | RL11_HUMAN       | K.VLEQLTGQTPVFSK.A      | 2             | 2.7801        | P62913             |
| <b><i>60S ribosomal protein L12 - Homo sapiens (Human)</i></b>                          |                  |                         |               |               |                    |
|                                                                                         | RL12_HUMAN       | R.C#TGGEVGSALAPK.I      | 2             | 3.3402        | P30050             |
| <b><i>60S ribosomal protein L18a - Homo sapiens (Human)</i></b>                         |                  |                         |               |               |                    |
|                                                                                         | RL18A_HUMAN      | R.DLTTAGAVTQC#YR.D      | 2             | 2.5021        | Q02543             |
|                                                                                         | RL18A_HUMAN      | R.DLTTAGAVTQC#YR.D      | 2             | 2.7058        | Q02543             |
|                                                                                         | RL18A_HUMAN      | R.DLTTAGAVTQC#YR.D      | 2             | 2.3983        | Q02543             |
| <b><i>60S ribosomal protein L35a - Homo sapiens (Human)</i></b>                         |                  |                         |               |               |                    |
|                                                                                         | RL35A_HUMAN      | K.NNTVTPGGKPNK.T        | 2             | 2.3165        | P18077             |
| <b><i>60S ribosomal protein L36 - Homo sapiens (Human)</i></b>                          |                  |                         |               |               |                    |
|                                                                                         | RL36_HUMAN       | R.EELSNVLAAMR.K         | 2             | 2.381         | Q9Y3U8             |
| <b><i>60S ribosomal protein L6 - Homo sapiens (Human)</i></b>                           |                  |                         |               |               |                    |
|                                                                                         | RL6_HUMAN        | R.HQEGEIFDTEK.E         | 2             | 3.2719        | Q02878             |
|                                                                                         | RL6_HUMAN        | K.HLTDAYFK.K            | 2             | 2.3575        | Q02878             |
|                                                                                         | RL6_HUMAN        | R.HQEGEIFDTEK.E         | 2             | 3.0324        | Q02878             |
|                                                                                         | RL6_HUMAN        | R.HQEGEIFDTEK.E         | 2             | 3.3082        | Q02878             |
|                                                                                         | RL6_HUMAN        | R.HQEGEIFDTEK.E         | 2             | 3.5256        | Q02878             |
| <b><i>60S ribosomal protein L7 - Homo sapiens (Human)</i></b>                           |                  |                         |               |               |                    |
|                                                                                         | RL7_HUMAN        | K.YGIIC#MEDLIHEIYTVGK.R | 3             | 4.0229        | P18124             |
|                                                                                         | RL7_HUMAN        | K.YGIIC#MEDLIHEIYTVGK.R | 3             | 3.8383        | P18124             |
| <b><i>60S ribosomal protein L7a - Homo sapiens (Human)</i></b>                          |                  |                         |               |               |                    |
|                                                                                         | RL7A_HUMAN       | K.VPPAINQFTQALDR.Q      | 2             | 2.3161        | P62424             |
|                                                                                         | RL7A_HUMAN       | K.VPPAINQFTQALDR.Q      | 2             | 3.4862        | P62424             |
|                                                                                         | RL7A_HUMAN       | K.VPPAINQFTQALDR.Q      | 2             | 3.502         | P62424             |
|                                                                                         | RL7A_HUMAN       | K.VPPAINQFTQALDR.Q      | 2             | 3.6929        | P62424             |
| <b><i>Acetyl-CoA carboxylase 1 - Homo sapiens (Human)</i></b>                           |                  |                         |               |               |                    |
|                                                                                         | COA1_HUMAN       | R.ESRGSVLEPEGTVEIK.F    | 2             | 2.6704        | Q13085             |
| <b><i>Actin, aortic smooth muscle - Homo sapiens (Human)</i></b>                        |                  |                         |               |               |                    |
|                                                                                         | ACTA_HUMAN       | K.DSYVGDEAQS.K          | 2             | 2.5043        | P62736             |

| <i>Protein</i>                                                             | <i>Reference</i> | <i>Peptide sequence</i>             | <i>Charge</i> | <i>XCorr*</i> | <i>Accession**</i> |
|----------------------------------------------------------------------------|------------------|-------------------------------------|---------------|---------------|--------------------|
| ACTA_HUMAN                                                                 |                  | K.LC#YVALDFENEM*ATAASSSSLEK.S       | 2             | 2.9462        | P62736             |
| ACTA_HUMAN                                                                 |                  | K.YPIEHGIITNWDDMEK.I                | 2             | 2.5817        | P62736             |
| ACTA_HUMAN                                                                 |                  | K.YPIEHGIITNWDDMEK.I                | 2             | 3.4953        | P62736             |
| ACTA_HUMAN                                                                 |                  | K.SYELPDGQVITIGNER.F                | 2             | 4.1844        | P62736             |
| ACTA_HUMAN                                                                 |                  | K.SYELPDGQVITIGNER.F                | 2             | 2.6786        | P62736             |
| ACTA_HUMAN                                                                 |                  | K.SYELPDGQVITIGNER.F                | 2             | 4.3354        | P62736             |
| ACTA_HUMAN                                                                 |                  | K.SYELPDGQVITIGNER.F                | 2             | 2.5062        | P62736             |
| ACTA_HUMAN                                                                 |                  | R.DLTDYLMK.I                        | 1             | 2.0545        | P62736             |
| ACTA_HUMAN                                                                 |                  | K.EITALAPSTMK.I                     | 2             | 2.3757        | P62736             |
| ACTA_HUMAN                                                                 |                  | K.EITALAPSTMK.I                     | 2             | 2.3554        | P62736             |
| ACTA_HUMAN                                                                 |                  | K.DSYVGDEAQS.K                      | 2             | 2.4682        | P62736             |
| ACTA_HUMAN                                                                 |                  | K.YPIEHGIITNWDDMEK.I                | 2             | 3.3464        | P62736             |
| <b><i>Actin, cytoplasmic 1 - Homo sapiens (Human)</i></b>                  |                  |                                     |               |               |                    |
| ACTB_HUMAN                                                                 |                  | R.TTGIVM*DSGDGVTHTVPIYEGYALPHAILR.L | 3             | 4.4499        | P60709             |
| ACTB_HUMAN                                                                 |                  | K.DLYANTVLSGGTTMYPGIADR.M           | 2             | 4.7415        | P60709             |
| ACTB_HUMAN                                                                 |                  | K.LC#YVALDFEQEMATAASSSSLEK.S        | 2             | 3.5094        | P60709             |
| ACTB_HUMAN                                                                 |                  | K.LC#YVALDFEQEMATAASSSSLEK.S        | 2             | 2.7066        | P60709             |
| ACTB_HUMAN                                                                 |                  | R.TTGIVMDSGDGVTHTVPIYEGYALPHAILR.L  | 3             | 5.1798        | P60709             |
| ACTB_HUMAN                                                                 |                  | K.LC#YVALDFEQEMATAASSSSLEK.S        | 2             | 2.3717        | P60709             |
| ACTB_HUMAN                                                                 |                  | K.LC#YVALDFEQEMATAASSSSLEK.S        | 2             | 3.4975        | P60709             |
| ACTB_HUMAN                                                                 |                  | K.LC#YVALDFEQEMATAASSSSLEK.S        | 2             | 5.4905        | P60709             |
| ACTB_HUMAN                                                                 |                  | K.LC#YVALDFEQEMATAASSSSLEK.S        | 2             | 4.0558        | P60709             |
| ACTB_HUMAN                                                                 |                  | R.TTGIVMDSGDGVTHTVPIYEGYALPHAILR.L  | 3             | 5.087         | P60709             |
| ACTB_HUMAN                                                                 |                  | K.DLYANTVLSGGTTMYPGIADR.M           | 2             | 4.9018        | P60709             |
| ACTB_HUMAN                                                                 |                  | K.DLYANTVLSGGTTMYPGIADR.M           | 2             | 3.6442        | P60709             |
| ACTB_HUMAN                                                                 |                  | R.C#PEALFQPSFLGMESC#GIHETTFNSIMK.C  | 3             | 3.9267        | P60709             |
| ACTB_HUMAN                                                                 |                  | R.VAPEEHPVLLTEAPLNPK.A              | 2             | 2.9046        | P60709             |
| ACTB_HUMAN                                                                 |                  | K.DLYANTVLSGGTTMYPGIADR.M           | 2             | 5.555         | P60709             |
| ACTB_HUMAN                                                                 |                  | K.DLYANTVLSGGTTMYPGIADR.M           | 2             | 2.5227        | P60709             |
| <b><i>Adenylyl cyclase-associated protein 1 - Homo sapiens (Human)</i></b> |                  |                                     |               |               |                    |
| CAP1_HUMAN                                                                 |                  | K.AGAAPYVQAFDSSLAGPVAEYLK.I         | 2             | 2.659         | Q01518             |
| CAP1_HUMAN                                                                 |                  | R.VENQENVSNLVIETELK.Q               | 2             | 3.8068        | Q01518             |
| CAP1_HUMAN                                                                 |                  | R.VENQENVSNLVIETELK.Q               | 2             | 3.1727        | Q01518             |
| <b><i>ADP/ATP translocase 2 - Homo sapiens (Human)</i></b>                 |                  |                                     |               |               |                    |
| ADT2_HUMAN                                                                 |                  | K.DFLAGGVA AISK.T                   | 2             | 2.6675        | P05141             |

| <i>Protein</i>                                                            | <i>Reference</i> | <i>Peptide sequence</i> | <i>Charge</i> | <i>XCorr*</i> | <i>Accession**</i> |
|---------------------------------------------------------------------------|------------------|-------------------------|---------------|---------------|--------------------|
|                                                                           | ADT2_HUMAN       | K.DFLAGGVAAAISK.T       | 1             | 3.0012        | P05141             |
|                                                                           | ADT2_HUMAN       | K.DFLAGGVAAAISK.T       | 2             | 4.2384        | P05141             |
|                                                                           | ADT2_HUMAN       | K.DFLAGGVAAAISK.T       | 2             | 2.5456        | P05141             |
|                                                                           | ADT2_HUMAN       | K.DFLAGGVAAAISK.T       | 2             | 3.8569        | P05141             |
|                                                                           | ADT2_HUMAN       | K.DFLAGGVAAAISK.T       | 2             | 3.5177        | P05141             |
| <b><i>ADP/ATP translocase 3 - Homo sapiens (Human)</i></b>                |                  |                         |               |               |                    |
|                                                                           | ADT3_HUMAN       | K.DFLAGGIAAAISK.T       | 2             | 3.2152        | P12236             |
|                                                                           | ADT3_HUMAN       | K.DFLAGGIAAAISK.T       | 2             | 3.9418        | P12236             |
|                                                                           | ADT3_HUMAN       | K.DFLAGGIAAAISK.T       | 2             | 3.7957        | P12236             |
|                                                                           | ADT3_HUMAN       | K.DFLAGGIAAAISK.T       | 2             | 4.1938        | P12236             |
| <b><i>ADP-ribosylation factor 1 - Homo sapiens (Human)</i></b>            |                  |                         |               |               |                    |
|                                                                           | ARF1_HUMAN       | K.QDLPNAMNAEITDK.L      | 2             | 3.029         | P84077             |
| <b><i>A-kinase anchor protein 9 - Homo sapiens (Human)</i></b>            |                  |                         |               |               |                    |
|                                                                           | AKAP9_HUMAN      | K.QMKEKENDLQEK.F        | 2             | 2.4166        | Q99996             |
| <b><i>Anaphase-promoting complex subunit 4 - Homo sapiens (Human)</i></b> |                  |                         |               |               |                    |
|                                                                           | ANC4_HUMAN       | R.MENIIDQC#LQKPADVIGK.S | 2             | 2.6898        | Q9UJX5             |
| <b><i>Ankyrin-2 - Homo sapiens (Human)</i></b>                            |                  |                         |               |               |                    |
|                                                                           | ANK2_HUMAN       | K.M*ADEQGDMDLQISPRK.T   | 2             | 2.3087        | Q01484             |
| <b><i>Annexin A1 - Homo sapiens (Human)</i></b>                           |                  |                         |               |               |                    |
|                                                                           | ANXA1_HUMAN      | K.TPAQFDADEL.R.A        | 2             | 3.1619        | P04083             |
|                                                                           | ANXA1_HUMAN      | K.GVDEATIIDLTK.R        | 2             | 3.5907        | P04083             |
|                                                                           | ANXA1_HUMAN      | K.GLGTDEDTLIEILASR.T    | 2             | 3.5575        | P04083             |
|                                                                           | ANXA1_HUMAN      | K.TPAQFDADEL.R.A        | 2             | 3.1115        | P04083             |
|                                                                           | ANXA1_HUMAN      | R.SEDFGVNEDLADSDAR.A    | 2             | 2.8906        | P04083             |
|                                                                           | ANXA1_HUMAN      | K.GVDEATIIDLTK.R        | 2             | 2.9551        | P04083             |
|                                                                           | ANXA1_HUMAN      | K.GLGTDEDTLIEILASR.T    | 2             | 3.6734        | P04083             |
|                                                                           | ANXA1_HUMAN      | K.GLGTDEDTLIEILASR.T    | 2             | 3.657         | P04083             |
| <b><i>Annexin A11 - Homo sapiens (Human)</i></b>                          |                  |                         |               |               |                    |
|                                                                           | ANX11_HUMAN      | K.TPVLFDIYEIK.E         | 2             | 2.4618        | P50995             |
|                                                                           | ANX11_HUMAN      | R.DAQELYAAGENR.L        | 2             | 2.6636        | P50995             |
|                                                                           | ANX11_HUMAN      | K.GFGTDEQAIIDC#LGSR.S   | 2             | 2.9791        | P50995             |
|                                                                           | ANX11_HUMAN      | K.GVGTDEAC#LIEILASR.S   | 2             | 2.8677        | P50995             |
|                                                                           | ANX11_HUMAN      | K.GFGTDEQAIIDC#LGSR.S   | 2             | 2.4671        | P50995             |
| <b><i>Annexin A2 - Homo sapiens (Human)</i></b>                           |                  |                         |               |               |                    |

| <i>Protein</i> | <i>Reference</i> | <i>Peptide sequence</i> | <i>Charge</i> | <i>XCorr*</i> | <i>Accession**</i> |
|----------------|------------------|-------------------------|---------------|---------------|--------------------|
| ANXA2_HUMAN    |                  | K.TPAQYDASELK.A         | 2             | 3.5016        | P07355             |
| ANXA2_HUMAN    |                  | K.TDLEKDIISDTSGDFR.K    | 2             | 4.6437        | P07355             |
| ANXA2_HUMAN    |                  | R.AEDGSVIDYELIDQDAR.D   | 2             | 2.6684        | P07355             |
| ANXA2_HUMAN    |                  | R.AEDGSVIDYELIDQDAR.D   | 2             | 3.6235        | P07355             |
| ANXA2_HUMAN    |                  | K.TPAQYDASELK.A         | 2             | 3.357         | P07355             |
| ANXA2_HUMAN    |                  | K.TDLEKDIISDTSGDFR.K    | 2             | 3.4621        | P07355             |
| ANXA2_HUMAN    |                  | R.TNQELQEINR.V          | 2             | 2.9638        | P07355             |
| ANXA2_HUMAN    |                  | K.TDLEKDIISDTSGDFR.K    | 2             | 4.1629        | P07355             |
| ANXA2_HUMAN    |                  | R.RAEDGSVIDYELIDQDAR.D  | 2             | 3.9007        | P07355             |
| ANXA2_HUMAN    |                  | R.RAEDGSVIDYELIDQDAR.D  | 3             | 3.9698        | P07355             |
| ANXA2_HUMAN    |                  | R.DALNIETAIK.T          | 2             | 2.6988        | P07355             |
| ANXA2_HUMAN    |                  | R.RAEDGSVIDYELIDQDAR.D  | 2             | 4.6405        | P07355             |
| ANXA2_HUMAN    |                  | K.GLGTDEDSLIEIIC#SR.T   | 2             | 3.3708        | P07355             |
| ANXA2_HUMAN    |                  | K.GLGTDEDSLIEIIC#SR.T   | 2             | 2.8156        | P07355             |
| ANXA2_HUMAN    |                  | K.TPAQYDASELK.A         | 2             | 3.6321        | P07355             |
| ANXA2_HUMAN    |                  | K.TDLEKDIISDTSGDFR.K    | 2             | 3.6445        | P07355             |
| ANXA2_HUMAN    |                  | K.TPAQYDASELK.A         | 2             | 3.1602        | P07355             |
| ANXA2_HUMAN    |                  | R.DALNIETAIK.T          | 2             | 2.755         | P07355             |
| ANXA2_HUMAN    |                  | K.SLYYYIQDQTK.G         | 2             | 2.613         | P07355             |
| ANXA2_HUMAN    |                  | R.RAEDGSVIDYELIDQDAR.D  | 2             | 4.0154        | P07355             |
| ANXA2_HUMAN    |                  | K.TDLEKDIISDTSGDFR.K    | 2             | 4.0158        | P07355             |

***Annexin A6 - Homo sapiens (Human)***

|             |  |                      |   |        |        |
|-------------|--|----------------------|---|--------|--------|
| ANXA6_HUMAN |  | K.SLHQAIEGDTSGDFLK.A | 2 | 2.4386 | P08133 |
| ANXA6_HUMAN |  | R.DLEADIIGDTSGHFQK.M | 2 | 2.8435 | P08133 |

***ANXA4 protein - Homo sapiens (Human)***

|             |  |                      |   |       |        |
|-------------|--|----------------------|---|-------|--------|
| Q6LES2_HUMA |  | K.SETSGSFEDALLAIVK.C | 2 | 2.486 | Q6LES2 |
|-------------|--|----------------------|---|-------|--------|

***Apoptosis regulator BAX, membrane isoform alpha - Homo sapiens (Human)***

|            |  |                          |   |        |        |
|------------|--|--------------------------|---|--------|--------|
| BAXA_HUMAN |  | R.MGGEAPELALDPVPQDASTK.K | 2 | 2.7284 | Q07812 |
| BAXA_HUMAN |  | R.MGGEAPELALDPVPQDASTK.K | 2 | 3.1274 | Q07812 |
| BAXA_HUMAN |  | R.IGDELDSNMELQR.M        | 2 | 3.7503 | Q07812 |
| BAXA_HUMAN |  | R.MGGEAPELALDPVPQDASTK.K | 2 | 3.701  | Q07812 |
| BAXA_HUMAN |  | R.MGGEAPELALDPVPQDASTK.K | 2 | 3.2272 | Q07812 |
| BAXA_HUMAN |  | R.IGDELDSNMELQR.M        | 2 | 4.0991 | Q07812 |
| BAXA_HUMAN |  | R.MGGEAPELALDPVPQDASTK.K | 2 | 2.9013 | Q07812 |
| BAXA_HUMAN |  | R.IGDELDSNM*ELQR.M       | 2 | 3.2652 | Q07812 |

| <i>Protein</i>                                                                     | <i>Reference</i> | <i>Peptide sequence</i>     | <i>Charge</i> | <i>XCorr*</i> | <i>Accession**</i> |
|------------------------------------------------------------------------------------|------------------|-----------------------------|---------------|---------------|--------------------|
| <b><i>Apoptosis-inducing factor 3 - Homo sapiens (Human)</i></b>                   |                  |                             |               |               |                    |
| AIFM3_HUMAN                                                                        |                  | R.GRNVVVVGAGFLGMEVAAYLTEK.A | 2             | 2.6413        | Q96NN9             |
| AIFM3_HUMAN                                                                        |                  | R.GRNVVVVGAGFLGMEVAAYLTEK.A | 2             | 2.3939        | Q96NN9             |
| <b><i>Astrotactin 2 - Homo sapiens (Human)</i></b>                                 |                  |                             |               |               |                    |
| A2A2T7_HUMAN                                                                       |                  | K.M*VSM*ARNTYYLTLISKVSPF.-  | 2             | 2.3168        | A2A2T7             |
| <b><i>Atlastin-3 - Homo sapiens (Human)</i></b>                                    |                  |                             |               |               |                    |
| ATLA3_HUMAN                                                                        |                  | R.YQQELEEEIKELYENFC#K.H     | 2             | 4.3985        | Q6DD88             |
| ATLA3_HUMAN                                                                        |                  | R.YQQELEEEIKELYENFC#K.H     | 2             | 5.517         | Q6DD88             |
| ATLA3_HUMAN                                                                        |                  | R.YQQELEEEIKELYENFC#K.H     | 2             | 4.3234        | Q6DD88             |
| ATLA3_HUMAN                                                                        |                  | R.YQQELEEEIKELYENFC#K.H     | 3             | 4.1117        | Q6DD88             |
| ATLA3_HUMAN                                                                        |                  | K.SMLQATAEANNLAAAASAK.D     | 2             | 3.7073        | Q6DD88             |
| ATLA3_HUMAN                                                                        |                  | R.YQQELEEEIKELYENFC#K.H     | 3             | 4.1868        | Q6DD88             |
| <b><i>ATP synthase B chain, mitochondrial precursor - Homo sapiens (Human)</i></b> |                  |                             |               |               |                    |
| AT5F1_HUMAN                                                                        |                  | K.HVVQSISTQKEK.E            | 2             | 2.7956        | P24539             |
| AT5F1_HUMAN                                                                        |                  | K.TGVTGPYVLGTGLILYALSK.E    | 2             | 3.697         | P24539             |
| AT5F1_HUMAN                                                                        |                  | K.TGVTGPYVLGTGLILYALSK.E    | 2             | 3.651         | P24539             |
| AT5F1_HUMAN                                                                        |                  | K.TGVTGPYVLGTGLILYALSK.E    | 2             | 3.6379        | P24539             |
| AT5F1_HUMAN                                                                        |                  | K.TGVTGPYVLGTGLILYALSK.E    | 2             | 4.2992        | P24539             |
| AT5F1_HUMAN                                                                        |                  | K.HVVQSISTQKEK.E            | 2             | 3.7883        | P24539             |
| AT5F1_HUMAN                                                                        |                  | K.HVVQSISTQKEK.E            | 2             | 3.7649        | P24539             |
| AT5F1_HUMAN                                                                        |                  | K.HVVQSISTQKEK.E            | 2             | 3.8684        | P24539             |
| <b><i>ATP synthase D chain, mitochondrial - Homo sapiens (Human)</i></b>           |                  |                             |               |               |                    |
| ATP5H_HUMAN                                                                        |                  | K.YPYWPHQPIENL.-            | 2             | 3.0641        | O75947             |
| ATP5H_HUMAN                                                                        |                  | K.YPYWPHQPIENL.-            | 2             | 3.4386        | O75947             |
| ATP5H_HUMAN                                                                        |                  | K.YTAQVDAEEKEDVK.S          | 2             | 2.5835        | O75947             |
| ATP5H_HUMAN                                                                        |                  | K.YTAQVDAEEKEDVK.S          | 2             | 2.6866        | O75947             |
| ATP5H_HUMAN                                                                        |                  | K.NLIPFDQM*TIEDLNEAFPETK.L  | 2             | 2.4828        | O75947             |
| ATP5H_HUMAN                                                                        |                  | K.NLIPFDQM*TIEDLNEAFPETK.L  | 2             | 5.1207        | O75947             |
| ATP5H_HUMAN                                                                        |                  | K.YPYWPHQPIENL.-            | 2             | 3.5086        | O75947             |
| ATP5H_HUMAN                                                                        |                  | K.NLIPFDQM*TIEDLNEAFPETK.L  | 2             | 3.1527        | O75947             |
| ATP5H_HUMAN                                                                        |                  | K.NLIPFDQM*TIEDLNEAFPETK.L  | 2             | 4.95          | O75947             |
| ATP5H_HUMAN                                                                        |                  | K.YPYWPHQPIENL.-            | 2             | 3.7376        | O75947             |
| ATP5H_HUMAN                                                                        |                  | K.NLIPFDQM*TIEDLNEAFPETK.L  | 2             | 5.0316        | O75947             |
| ATP5H_HUMAN                                                                        |                  | K.NLIPFDQM*TIEDLNEAFPETK.L  | 2             | 2.4485        | O75947             |
| ATP5H_HUMAN                                                                        |                  | K.NLIPFDQM*TIEDLNEAFPETK.L  | 2             | 2.7713        | O75947             |

| <i>Protein</i>                                                                               | <i>Reference</i> | <i>Peptide sequence</i>    | <i>Charge</i> | <i>XCorr*</i> | <i>Accession**</i> |
|----------------------------------------------------------------------------------------------|------------------|----------------------------|---------------|---------------|--------------------|
| <b><i>ATP synthase f chain, mitochondrial - Homo sapiens (Human)</i></b>                     |                  |                            |               |               |                    |
| ATPK_HUMAN                                                                                   |                  | R.DFSPSGIFGAFQR.G          | 2             | 2.8601        | P56134             |
| ATPK_HUMAN                                                                                   |                  | R.DFSPSGIFGAFQR.G          | 2             | 2.4191        | P56134             |
| <b><i>ATP synthase subunit alpha, mitochondrial precursor - Homo sapiens (Human)</i></b>     |                  |                            |               |               |                    |
| ATPA_HUMAN                                                                                   |                  | R.TGAIVDVPVGEELLGR.V       | 2             | 3.0531        | P25705             |
| ATPA_HUMAN                                                                                   |                  | R.TGAIVDVPVGEELLGR.V       | 2             | 2.5581        | P25705             |
| ATPA_HUMAN                                                                                   |                  | R.ILGADTSVDLEETGR.V        | 2             | 3.4327        | P25705             |
| ATPA_HUMAN                                                                                   |                  | R.EVAАFAQFGSDLDAATQQLLSR.G | 3             | 4.2238        | P25705             |
| ATPA_HUMAN                                                                                   |                  | K.TGTAEMSSILEER.I          | 2             | 2.338         | P25705             |
| ATPA_HUMAN                                                                                   |                  | R.EVAАFAQFGSDLDAATQQLLSR.G | 2             | 4.2796        | P25705             |
| ATPA_HUMAN                                                                                   |                  | R.EVAАFAQFGSDLDAATQQLLSR.G | 2             | 5.7132        | P25705             |
| ATPA_HUMAN                                                                                   |                  | R.EVAАFAQFGSDLDAATQQLLSR.G | 2             | 5.2359        | P25705             |
| ATPA_HUMAN                                                                                   |                  | K.QGQYSPMAIEEQVAVIYAGVR.G  | 2             | 2.7988        | P25705             |
| ATPA_HUMAN                                                                                   |                  | K.FENAFLSHVVSQHQALLGTIR.A  | 3             | 4.5791        | P25705             |
| ATPA_HUMAN                                                                                   |                  | R.ILGADTSVDLEETGR.V        | 2             | 3.5817        | P25705             |
| ATPA_HUMAN                                                                                   |                  | K.TGTAEMSSILEER.I          | 2             | 2.9482        | P25705             |
| ATPA_HUMAN                                                                                   |                  | K.TGTAEMSSILEER.I          | 2             | 2.6233        | P25705             |
| ATPA_HUMAN                                                                                   |                  | K.TGTAEMSSILEER.I          | 2             | 2.8654        | P25705             |
| <b><i>ATP synthase subunit beta, mitochondrial precursor - Homo sapiens (Human)</i></b>      |                  |                            |               |               |                    |
| ATPB_HUMAN                                                                                   |                  | R.AIAELGIYPAVDPLDSTSR.I    | 2             | 2.6942        | P06576             |
| ATPB_HUMAN                                                                                   |                  | R.DQEGQDVLLFIDNIFR.F       | 2             | 2.7577        | P06576             |
| ATPB_HUMAN                                                                                   |                  | R.AIAELGIYPAVDPLDSTSR.I    | 2             | 2.8058        | P06576             |
| ATPB_HUMAN                                                                                   |                  | R.DQEGQDVLLFIDNIFR.F       | 2             | 4.9077        | P06576             |
| ATPB_HUMAN                                                                                   |                  | R.AIAELGIYPAVDPLDSTSR.I    | 2             | 2.5221        | P06576             |
| ATPB_HUMAN                                                                                   |                  | R.AIAELGIYPAVDPLDSTSR.I    | 2             | 2.9823        | P06576             |
| ATPB_HUMAN                                                                                   |                  | R.DQEGQDVLLFIDNIFR.F       | 2             | 4.5136        | P06576             |
| ATPB_HUMAN                                                                                   |                  | R.DQEGQDVLLFIDNIFR.F       | 2             | 3.5215        | P06576             |
| <b><i>ATP synthase-coupling factor 6, mitochondrial precursor - Homo sapiens (Human)</i></b> |                  |                            |               |               |                    |
| ATP5J_HUMAN                                                                                  |                  | R.QTSGGPVDASSEYQQELER.E    | 2             | 2.9976        | P18859             |
| <b><i>ATP-binding cassette sub-family D member 1 - Homo sapiens (Human)</i></b>              |                  |                            |               |               |                    |
| ABCD1_HUMAN                                                                                  |                  | R.GLQAPAGEPTQEASGVAAAK.A   | 2             | 3.3297        | P33897             |
| <b><i>ATP-dependent DNA helicase 2 subunit 1 - Homo sapiens (Human)</i></b>                  |                  |                            |               |               |                    |
| KU70_HUMAN                                                                                   |                  | R.DIISIAEDEDLR.V           | 2             | 2.5948        | P12956             |
| <b><i>ATP-dependent DNA helicase 2 subunit 2 - Homo sapiens (Human)</i></b>                  |                  |                            |               |               |                    |



| <i>Protein</i>                                                            | <i>Reference</i> | <i>Peptide sequence</i>           | <i>Charge</i> | <i>XCorr*</i> | <i>Accession**</i> |
|---------------------------------------------------------------------------|------------------|-----------------------------------|---------------|---------------|--------------------|
| KU86_HUMAN                                                                |                  | R.HLM*LPDFDLLEDIESK.I             | 2             | 2.7409        | P13010             |
| KU86_HUMAN                                                                |                  | R.HLMLPDFDLLEDIESK.I              | 2             | 2.3713        | P13010             |
| KU86_HUMAN                                                                |                  | R.HLMLPDFDLLEDIESK.I              | 2             | 3.0779        | P13010             |
| KU86_HUMAN                                                                |                  | R.HLMLPDFDLLEDIESK.I              | 2             | 4.1663        | P13010             |
| KU86_HUMAN                                                                |                  | R.HLMLPDFDLLEDIESK.I              | 3             | 5.0778        | P13010             |
| KU86_HUMAN                                                                |                  | R.HLM*LPDFDLLEDIESK.I             | 2             | 2.7511        | P13010             |
| KU86_HUMAN                                                                |                  | K.YAPTEAQLNAVDALIDSMFLAK.K        | 3             | 4.2559        | P13010             |
| KU86_HUMAN                                                                |                  | K.YAPTEAQLNAVDALIDSMFLAK.K        | 2             | 3.7149        | P13010             |
| KU86_HUMAN                                                                |                  | R.HLMLPDFDLLEDIESK.I              | 2             | 3.4906        | P13010             |
| KU86_HUMAN                                                                |                  | R.HLMLPDFDLLEDIESK.I              | 2             | 3.6208        | P13010             |
| KU86_HUMAN                                                                |                  | R.HLM*LPDFDLLEDIESK.I             | 2             | 3.4466        | P13010             |
| KU86_HUMAN                                                                |                  | R.HLM*LPDFDLLEDIESK.I             | 2             | 2.7382        | P13010             |
| <b><i>ATP-dependent RNA helicase A - Homo sapiens (Human)</i></b>         |                  |                                   |               |               |                    |
| DHX9_HUMAN                                                                |                  | K.ETPFELIEALLK.Y                  | 2             | 2.7022        | Q08211             |
| DHX9_HUMAN                                                                |                  | K.ETPFELIEALLK.Y                  | 2             | 2.6314        | Q08211             |
| DHX9_HUMAN                                                                |                  | K.ETPFELIEALLK.Y                  | 2             | 2.9501        | Q08211             |
| DHX9_HUMAN                                                                |                  | K.ETPFELIEALLK.Y                  | 2             | 2.4901        | Q08211             |
| <b><i>ATP-dependent RNA helicase DDX3X - Homo sapiens (Human)</i></b>     |                  |                                   |               |               |                    |
| DDX3X_HUMAN                                                               |                  | K.DLLDLLVEAK.Q                    | 2             | 2.3684        | O00571             |
| <b><i>Bcl-2-like 13 protein - Homo sapiens (Human)</i></b>                |                  |                                   |               |               |                    |
| B2L13_HUMAN                                                               |                  | K.SSPATSLFVELDEEEVK.A             | 2             | 2.5705        | Q9BXX5             |
| B2L13_HUMAN                                                               |                  | R.EESLVEELSPASEK.K                | 2             | 2.9715        | Q9BXX5             |
| B2L13_HUMAN                                                               |                  | R.EESLVEELSPASEK.K                | 2             | 2.8184        | Q9BXX5             |
| <b><i>BH3-interacting domain death agonist - Homo sapiens (Human)</i></b> |                  |                                   |               |               |                    |
| BID_HUMAN                                                                 |                  | R.DLATALEQLLQAYPR.D               | 3             | 4.0411        | P55957             |
| BID_HUMAN                                                                 |                  | R.IEADSESQEDIIR.N                 | 2             | 2.6668        | P55957             |
| BID_HUMAN                                                                 |                  | R.DLATALEQLLQAYPR.D               | 3             | 4.1203        | P55957             |
| BID_HUMAN                                                                 |                  | R.HLAQVGDSDMDR.S                  | 2             | 2.6184        | P55957             |
| <b><i>Brain acid soluble protein 1 - Homo sapiens (Human)</i></b>         |                  |                                   |               |               |                    |
| BASP_HUMAN                                                                |                  | K.AQGPAASAEEPKPVEAPAANSQQTVTVKE.- | 3             | 5.4931        | P80723             |
| BASP_HUMAN                                                                |                  | K.AQGPAASAEEPKPVEAPAANSQQTVTVKE   | 3             | 3.8532        | P80723             |
| BASP_HUMAN                                                                |                  | K.AQGPAASAEEPKPVEAPAANSQQTVTVKE.- | 3             | 3.8979        | P80723             |
| BASP_HUMAN                                                                |                  | K.AQGPAASAEEPKPVEAPAANSQQTVTVKE.- | 3             | 4.8189        | P80723             |
| <b><i>BRI3-binding protein - Homo sapiens (Human)</i></b>                 |                  |                                   |               |               |                    |

| <i>Protein</i>                                                                         | <i>Reference</i> | <i>Peptide sequence</i> | <i>Charge</i> | <i>XCorr*</i> | <i>Accession**</i> |
|----------------------------------------------------------------------------------------|------------------|-------------------------|---------------|---------------|--------------------|
|                                                                                        | BRI3B_HUMAN      | R.SSPSGPSNPSNPSVEEK.L   | 2             | 2.748         | Q8WY22             |
|                                                                                        | BRI3B_HUMAN      | R.SSPSGPSNPSNPSVEEK.L   | 2             | 3.9403        | Q8WY22             |
|                                                                                        | BRI3B_HUMAN      | R.SSPSGPSNPSNPSVEEK.L   | 2             | 4.0793        | Q8WY22             |
| <b><i>CAAX prenyl protease 1 homolog - Homo sapiens (Human)</i></b>                    |                  |                         |               |               |                    |
|                                                                                        | FACE1_HUMAN      | K.DIQEDSGMEPR.N         | 2             | 2.6355        | O75844             |
| <b><i>Calcium-binding protein p22 - Homo sapiens (Human)</i></b>                       |                  |                         |               |               |                    |
|                                                                                        | CHP1_HUMAN       | R.IPELAINPLGDR.I        | 2             | 2.9043        | Q99653             |
| <b><i>Calnexin precursor - Homo sapiens (Human)</i></b>                                |                  |                         |               |               |                    |
|                                                                                        | CALX_HUMAN       | K.IPNPDFFEDLEPFR.M      | 2             | 3.7897        | P27824             |
|                                                                                        | CALX_HUMAN       | K.IPNPDFFEDLEPFR.M      | 2             | 3.5832        | P27824             |
|                                                                                        | CALX_HUMAN       | K.APVPTGEVYFADSFDR.G    | 2             | 3.5884        | P27824             |
|                                                                                        | CALX_HUMAN       | K.SDAEEDGGTVSQEEEDR.K   | 2             | 3.8687        | P27824             |
|                                                                                        | CALX_HUMAN       | K.TPELNLDQFHDK.T        | 2             | 3.8663        | P27824             |
|                                                                                        | CALX_HUMAN       | K.AEEDEILNR.S           | 2             | 2.4758        | P27824             |
|                                                                                        | CALX_HUMAN       | R.PVIDNPNYK.G           | 2             | 2.5081        | P27824             |
|                                                                                        | CALX_HUMAN       | K.IPNPDFFEDLEPFR.M      | 2             | 4.2483        | P27824             |
|                                                                                        | CALX_HUMAN       | K.IPNPDFFEDLEPFR.M      | 2             | 4.2637        | P27824             |
|                                                                                        | CALX_HUMAN       | K.IPNPDFFEDLEPFR.M      | 2             | 3.6822        | P27824             |
|                                                                                        | CALX_HUMAN       | R.PVIDNPNYK.G           | 2             | 2.5179        | P27824             |
|                                                                                        | CALX_HUMAN       | K.TPELNLDQFHDK.T        | 3             | 3.8899        | P27824             |
|                                                                                        | CALX_HUMAN       | K.QKSDAEEDGGTVSQEEEDR.K | 3             | 3.8138        | P27824             |
|                                                                                        | CALX_HUMAN       | K.AEEDEILNR.S           | 2             | 2.3884        | P27824             |
|                                                                                        | CALX_HUMAN       | K.APVPTGEVYFADSFDR.G    | 2             | 2.9827        | P27824             |
|                                                                                        | CALX_HUMAN       | K.IPNPDFFEDLEPFR.M      | 2             | 3.997         | P27824             |
|                                                                                        | CALX_HUMAN       | K.AEEDEILNR.S           | 2             | 2.4259        | P27824             |
|                                                                                        | CALX_HUMAN       | K.APVPTGEVYFADSFDR.G    | 2             | 4.2451        | P27824             |
|                                                                                        | CALX_HUMAN       | K.IPNPDFFEDLEPFR.M      | 2             | 4.1753        | P27824             |
|                                                                                        | CALX_HUMAN       | K.IPNPDFFEDLEPFR.M      | 2             | 4.4318        | P27824             |
|                                                                                        | CALX_HUMAN       | R.PVIDNPNYK.G           | 2             | 2.306         | P27824             |
| <b><i>Carnitine O-palmitoyltransferase I, liver isoform - Homo sapiens (Human)</i></b> |                  |                         |               |               |                    |
|                                                                                        | CPT1A_HUMAN      | R.ILDNTSEPQPGEAR.L      | 2             | 2.655         | P50416             |
| <b><i>Caspase-1 precursor - Homo sapiens (Human)</i></b>                               |                  |                         |               |               |                    |
|                                                                                        | CASP1_HUMAN      | R.SMGEGTINGLLDELLQTR.V  | 2             | 2.8942        | P29466             |
| <b><i>Catechol O-methyltransferase - Homo sapiens (Human)</i></b>                      |                  |                         |               |               |                    |

| <i>Protein</i>                                                                                 | <i>Reference</i> | <i>Peptide sequence</i>           | <i>Charge</i> | <i>XCorr*</i> | <i>Accession**</i> |
|------------------------------------------------------------------------------------------------|------------------|-----------------------------------|---------------|---------------|--------------------|
|                                                                                                | COMT_HUMAN       | R.ILNHVLQHAEPGNAQSVLEAIDTYC#EQK.E | 3             | 4.5786        | P21964             |
| <b><i>Cathepsin G precursor - Homo sapiens (Human)</i></b>                                     |                  |                                   |               |               |                    |
|                                                                                                | CATG_HUMAN       | R.PYMAYLQIQSPAGQSR.C              | 2             | 4.1229        | P08311             |
|                                                                                                | CATG_HUMAN       | R.PYMAYLQIQSPAGQSR.C              | 2             | 3.0831        | P08311             |
|                                                                                                | CATG_HUMAN       | R.PYMAYLQIQSPAGQSR.C              | 2             | 3.9247        | P08311             |
| <b><i>Cation-independent mannose-6-phosphate receptor precursor - Homo sapiens (Human)</i></b> |                  |                                   |               |               |                    |
|                                                                                                | MPRI_HUMAN       | K.VPIDGPPIDIGR.V                  | 2             | 2.5405        | P11717             |
| <b><i>CD302 antigen precursor - Homo sapiens (Human)</i></b>                                   |                  |                                   |               |               |                    |
|                                                                                                | CD302_HUMAN      | K.GPDDILLGMFYDTHDASFK.W           | 2             | 2.4584        | Q8IX05             |
| <b><i>CD44 antigen precursor - Homo sapiens (Human)</i></b>                                    |                  |                                   |               |               |                    |
|                                                                                                | CD44_HUMAN       | K.ESSETPDQFMTADETR.N              | 2             | 3.4633        | P16070             |
|                                                                                                | CD44_HUMAN       | K.ESSETPDQFM*TADETR.N             | 2             | 2.9127        | P16070             |
|                                                                                                | CD44_HUMAN       | K.ESSETPDQFMTADETR.N              | 2             | 3.7876        | P16070             |
| <b><i>CD97 antigen precursor - Homo sapiens (Human)</i></b>                                    |                  |                                   |               |               |                    |
|                                                                                                | CD97_HUMAN       | R.HLIATQLLSNLEDIMR.I              | 2             | 3.3934        | P48960             |
|                                                                                                | CD97_HUMAN       | R.HLIATQLLSNLEDIMR.I              | 2             | 3.4195        | P48960             |
|                                                                                                | CD97_HUMAN       | K.LVDELM*EAPGDVEALAPPVR.H         | 2             | 2.8974        | P48960             |
| <b><i>CDNA FLJ30700 fis, clone FCBBF2000940 - Homo sapiens (Human)</i></b>                     |                  |                                   |               |               |                    |
|                                                                                                | Q96NK0_HUMA      | K.AFLHSLLAFSVAREKTFHF.-           | 2             | 2.4159        | Q96NK0             |
| <b><i>Cell cycle control protein 50A - Homo sapiens (Human)</i></b>                            |                  |                                   |               |               |                    |
|                                                                                                | CC50A_HUMAN      | R.RPDNTAFK.Q                      | 2             | 2.6749        | Q9NV96             |
|                                                                                                | CC50A_HUMAN      | K.DEVDGGPPC#APGGTAK.T             | 2             | 2.3191        | Q9NV96             |
| <b><i>Cellular tumor antigen p53 - Homo sapiens (Human)</i></b>                                |                  |                                   |               |               |                    |
|                                                                                                | P53_HUMAN        | R.VEYLDDR.N                       | 2             | 2.4083        | P04637             |
|                                                                                                | P53_HUMAN        | K.SVTC#TYSPALNK.M                 | 2             | 3.0866        | P04637             |
|                                                                                                | P53_HUMAN        | K.SVTC#TYSPALNK.M                 | 2             | 2.6459        | P04637             |
|                                                                                                | P53_HUMAN        | K.SVTC#TYSPALNK.M                 | 2             | 2.803         | P04637             |
|                                                                                                | P53_HUMAN        | K.SVTC#TYSPALNK.M                 | 2             | 2.8386        | P04637             |
|                                                                                                | P53_HUMAN        | R.RTEENLR.K                       | 2             | 2.6067        | P04637             |
| <b><i>Centromeric protein E - Homo sapiens (Human)</i></b>                                     |                  |                                   |               |               |                    |
|                                                                                                | CENPE_HUMAN      | K.FQESQEEIKSLTK.E                 | 2             | 2.4465        | Q02224             |
| <b><i>Centrosomal protein of 152 kDa - Homo sapiens (Human)</i></b>                            |                  |                                   |               |               |                    |
|                                                                                                | CE152_HUMAN      | R.QMVQDFDHDKQEAVIDR.C             | 2             | 2.3151        | O94986             |
| <b><i>Clathrin heavy chain 1 - Homo sapiens (Human)</i></b>                                    |                  |                                   |               |               |                    |

| <i>Protein</i>                                                                          | <i>Reference</i> | <i>Peptide sequence</i>      | <i>Charge</i> | <i>XCorr*</i> | <i>Accession**</i> |
|-----------------------------------------------------------------------------------------|------------------|------------------------------|---------------|---------------|--------------------|
| CLH1_HUMAN                                                                              |                  | R.LPVVIGLLDVDC#SEDVIK.N      | 2             | 3.5112        | Q00610             |
| CLH1_HUMAN                                                                              |                  | R.GQFSTDELVAEVEK.R           | 2             | 2.4377        | Q00610             |
| CLH1_HUMAN                                                                              |                  | R.GQFSTDELVAEVEK.R           | 2             | 2.9993        | Q00610             |
| CLH1_HUMAN                                                                              |                  | R.GQFSTDELVAEVEK.R           | 2             | 2.7256        | Q00610             |
| CLH1_HUMAN                                                                              |                  | K.SVNESLNNLFITEEDYQALR.T     | 2             | 2.4704        | Q00610             |
| CLH1_HUMAN                                                                              |                  | K.DTELAEEELLQWFLQEEK.R       | 2             | 3.0965        | Q00610             |
| CLH1_HUMAN                                                                              |                  | K.DTELAEEELLQWFLQEEK.R       | 2             | 3.9757        | Q00610             |
| CLH1_HUMAN                                                                              |                  | K.AFM*TADLPNELIELLEK.I       | 2             | 2.8367        | Q00610             |
| CLH1_HUMAN                                                                              |                  | R.LPVVIGLLDVDC#SEDVIK.N      | 2             | 3.9852        | Q00610             |
| CLH1_HUMAN                                                                              |                  | K.SVNESLNNLFITEEDYQALR.T     | 2             | 2.5045        | Q00610             |
| <b><i>Coatomer subunit gamma - Homo sapiens (Human)</i></b>                             |                  |                              |               |               |                    |
| COPG_HUMAN                                                                              |                  | R.AIVDC#IISIIENSESEK.E       | 2             | 2.7527        | Q9Y678             |
| <b><i>Cofilin-1 - Homo sapiens (Human)</i></b>                                          |                  |                              |               |               |                    |
| COF1_HUMAN                                                                              |                  | K.HELQANC#YEEVKDR.C          | 3             | 4.6603        | P23528             |
| <b><i>Cohesin subunit SA-2 - Homo sapiens (Human)</i></b>                               |                  |                              |               |               |                    |
| STAG2_HUMAN                                                                             |                  | K.YYNDYGDIKETM*SKTR.Q        | 2             | 2.5314        | Q8N3U4             |
| <b><i>Coiled-coil domain-containing protein 47 precursor - Homo sapiens (Human)</i></b> |                  |                              |               |               |                    |
| CCD47_HUMAN                                                                             |                  | K.YGLPDSLAILSEMGEVTDGMMDTK.M | 2             | 3.3195        | Q96A33             |
| <b><i>Core histone macro-H2A.1 - Homo sapiens (Human)</i></b>                           |                  |                              |               |               |                    |
| H2AY_HUMAN                                                                              |                  | K.AASADSTTEGTPADGFTVLSTK.S   | 2             | 2.4287        | O75367             |
| <b><i>Core histone macro-H2A.2 - Homo sapiens (Human)</i></b>                           |                  |                              |               |               |                    |
| H2AW_HUMAN                                                                              |                  | R.HILLAVANDEELNQLLK.G        | 2             | 3.2287        | Q9P0M6             |
| H2AW_HUMAN                                                                              |                  | R.HILLAVANDEELNQLLK.G        | 2             | 3.7567        | Q9P0M6             |
| H2AW_HUMAN                                                                              |                  | R.HILLAVANDEELNQLLK.G        | 2             | 2.9756        | Q9P0M6             |
| <b><i>Coronin-7 - Homo sapiens (Human)</i></b>                                          |                  |                              |               |               |                    |
| CORO7_HUMAN                                                                             |                  | R.VPAEGLEEVLTTPETVLTGHTEK.I  | 3             | 4.5015        | P57737             |
| <b><i>Cytochrome b reductase 1 - Homo sapiens (Human)</i></b>                           |                  |                              |               |               |                    |
| Q53TN4_HUMA                                                                             |                  | R.NLALDEAGQR.S               | 2             | 2.4976        | Q53TN4             |
| <b><i>Cytochrome b-245 heavy chain - Homo sapiens (Human)</i></b>                       |                  |                              |               |               |                    |
| CY24B_HUMAN                                                                             |                  | R.IVGDWTEGLFNAC#GC#DK.Q      | 2             | 2.8523        | P04839             |
| CY24B_HUMAN                                                                             |                  | R.IGVFLC#GPEALAETLSK.Q       | 2             | 4.9213        | P04839             |
| CY24B_HUMAN                                                                             |                  | R.IVGDWTEGLFNAC#GC#DK.Q      | 2             | 3.2526        | P04839             |
| CY24B_HUMAN                                                                             |                  | R.IGVFLC#GPEALAETLSK.Q       | 2             | 2.8403        | P04839             |
| CY24B_HUMAN                                                                             |                  | R.IGVFLC#GPEALAETLSK.Q       | 2             | 4.9155        | P04839             |

| <i>Protein</i>                                                                                         | <i>Reference</i> | <i>Peptide sequence</i>               | <i>Charge</i> | <i>XCorr*</i> | <i>Accession**</i> |
|--------------------------------------------------------------------------------------------------------|------------------|---------------------------------------|---------------|---------------|--------------------|
|                                                                                                        | CY24B_HUMAN      | R.IVGDWTEGLFNAC#GC#DK.Q               | 2             | 2.6739        | P04839             |
|                                                                                                        | CY24B_HUMAN      | R.IGVFLC#GPEALAETLSK.Q                | 2             | 2.4464        | P04839             |
| <b><i>Cytochrome b-245 light chain - Homo sapiens (Human)</i></b>                                      |                  |                                       |               |               |                    |
|                                                                                                        | CY24A_HUMAN      | R.KKPSEEEEEAAAAGGPPGGPQVNPPIVTDEVV.-  | 2             | 4.3861        | P13498             |
|                                                                                                        | CY24A_HUMAN      | K.HMTAVVK.L                           | 2             | 2.4019        | P13498             |
|                                                                                                        | CY24A_HUMAN      | R.KKPSEEEEEAAAAGGPPGGPQVNPPIVTDEVV.-  | 2             | 4.4304        | P13498             |
|                                                                                                        | CY24A_HUMAN      | K.HMTAVVK.L                           | 2             | 2.5863        | P13498             |
| <b><i>Cytochrome b5 type B precursor - Homo sapiens (Human)</i></b>                                    |                  |                                       |               |               |                    |
|                                                                                                        | CYB5B_HUMAN      | R.FLNEHPGGEEVLLAQAGVDASESFEDVGHSSDAR. | 3             | 4.6121        | O43169             |
| <b><i>Cytochrome c oxidase subunit 4 isoform 1, mitochondrial precursor - Homo sapiens (Human)</i></b> |                  |                                       |               |               |                    |
|                                                                                                        | COX41_HUMAN      | K.SEDFSLPAYMDR.R                      | 2             | 2.7377        | P13073             |
|                                                                                                        | COX41_HUMAN      | R.DHPLPEVAHVK.H                       | 3             | 3.7968        | P13073             |
|                                                                                                        | COX41_HUMAN      | K.SEDFSLPAYMDR.R                      | 2             | 2.8282        | P13073             |
|                                                                                                        | COX41_HUMAN      | R.DHPLPEVAHVK.H                       | 3             | 4.1384        | P13073             |
|                                                                                                        | COX41_HUMAN      | R.DHPLPEVAHVK.H                       | 3             | 3.916         | P13073             |
|                                                                                                        | COX41_HUMAN      | K.SEDFSLPAYMDR.R                      | 2             | 2.8457        | P13073             |
| <b><i>Cytochrome c oxidase subunit 5A, mitochondrial precursor - Homo sapiens (Human)</i></b>          |                  |                                       |               |               |                    |
|                                                                                                        | COX5A_HUMAN      | K.GINTLVITYDMVPEPK.I                  | 2             | 4.1561        | P20674             |
|                                                                                                        | COX5A_HUMAN      | K.GINTLVITYDM*VPEPK.I                 | 2             | 2.9667        | P20674             |
|                                                                                                        | COX5A_HUMAN      | K.GINTLVITYDM*VPEPK.I                 | 2             | 2.509         | P20674             |
|                                                                                                        | COX5A_HUMAN      | K.GINTLVITYDM*VPEPK.I                 | 2             | 2.8511        | P20674             |
|                                                                                                        | COX5A_HUMAN      | K.GINTLVITYDMVPEPK.I                  | 2             | 4.5986        | P20674             |
| <b><i>Cytochrome c oxidase subunit 5B, mitochondrial precursor - Homo sapiens (Human)</i></b>          |                  |                                       |               |               |                    |
|                                                                                                        | COX5B_HUMAN      | R.EDPNLVPSISNK.R                      | 2             | 2.3091        | P10606             |
| <b><i>Cytoskeleton-associated protein 4 - Homo sapiens (Human)</i></b>                                 |                  |                                       |               |               |                    |
|                                                                                                        | CKAP4_HUMAN      | K.IETNENNLESAG.G                      | 2             | 2.591         | Q07065             |
|                                                                                                        | CKAP4_HUMAN      | R.LEGLGSSEADQDGLASTVR.S               | 2             | 3.3494        | Q07065             |
|                                                                                                        | CKAP4_HUMAN      | K.VQEQVHTLLSQDQAQAAR.L                | 2             | 4.6148        | Q07065             |
|                                                                                                        | CKAP4_HUMAN      | R.ERDFTSLENTVEER.L                    | 2             | 3.8402        | Q07065             |
|                                                                                                        | CKAP4_HUMAN      | R.LEGLGSSEADQDGLASTVR.S               | 2             | 3.2866        | Q07065             |
|                                                                                                        | CKAP4_HUMAN      | K.VASLEESEGNKQDLK.A                   | 2             | 2.6076        | Q07065             |
|                                                                                                        | CKAP4_HUMAN      | R.DFTSLENTVEER.L                      | 2             | 2.6626        | Q07065             |
|                                                                                                        | CKAP4_HUMAN      | R.SVGELPSTVESLQK.V                    | 2             | 3.8083        | Q07065             |
|                                                                                                        | CKAP4_HUMAN      | R.SVGELPSTVESLQK.V                    | 2             | 2.3053        | Q07065             |

| <i>Protein</i>                                                                             | <i>Reference</i> | <i>Peptide sequence</i>       | <i>Charge</i> | <i>XCorr*</i> | <i>Accession**</i> |
|--------------------------------------------------------------------------------------------|------------------|-------------------------------|---------------|---------------|--------------------|
| CKAP4_HUMAN                                                                                |                  | R.EELGQGLQGVEQK.V             | 2             | 3.048         | Q07065             |
| CKAP4_HUMAN                                                                                |                  | K.SSSSSASAAAAAASSSASC#SR.R    | 2             | 2.5436        | Q07065             |
| CKAP4_HUMAN                                                                                |                  | R.SVGELPSTVESLQK.V            | 2             | 2.555         | Q07065             |
| CKAP4_HUMAN                                                                                |                  | R.ERDFTSLENTVEER.L            | 2             | 3.8979        | Q07065             |
| CKAP4_HUMAN                                                                                |                  | R.LEGLGSSEADQDGLASTVR.S       | 2             | 4.0283        | Q07065             |
| CKAP4_HUMAN                                                                                |                  | R.EELGQGLQGVEQK.V             | 2             | 3.4478        | Q07065             |
| CKAP4_HUMAN                                                                                |                  | R.SVGELPSTVESLQK.V            | 2             | 3.4329        | Q07065             |
| CKAP4_HUMAN                                                                                |                  | R.LEGLGSSEADQDGLASTVR.S       | 2             | 4.0553        | Q07065             |
| CKAP4_HUMAN                                                                                |                  | R.SVGELPSTVESLQK.V            | 2             | 3.13          | Q07065             |
| CKAP4_HUMAN                                                                                |                  | R.DFTSLENTVEER.L              | 2             | 3.0342        | Q07065             |
| CKAP4_HUMAN                                                                                |                  | K.DLSDGIHVVK.D                | 2             | 2.3935        | Q07065             |
| <b><i>Cytoskeleton-associated protein 5 - Homo sapiens (Human)</i></b>                     |                  |                               |               |               |                    |
| CKAP5_HUMAN                                                                                |                  | K.DQVLAMLEKAK.V               | 2             | 2.6213        | Q14008             |
| <b><i>DC2 - Homo sapiens (Human)</i></b>                                                   |                  |                               |               |               |                    |
| Q9NRP0_HUMA                                                                                |                  | R.VPFLVLEC#PNLK.L             | 2             | 3.6637        | Q9NRP0             |
| Q9NRP0_HUMA                                                                                |                  | R.VPFLVLEC#PNLK.L             | 2             | 3.5747        | Q9NRP0             |
| Q9NRP0_HUMA                                                                                |                  | R.VPFLVLEC#PNLK.L             | 2             | 4.0059        | Q9NRP0             |
| <b><i>Dehydrogenase/reductase SDR family member 8 precursor - Homo sapiens (Human)</i></b> |                  |                               |               |               |                    |
| DHRS8_HUMAN                                                                                |                  | K.NPSTSLGPTLEPEEVNR.L         | 2             | 3.6444        | Q8NBQ5             |
| DHRS8_HUMAN                                                                                |                  | K.NPSTSLGPTLEPEEVNR.L         | 2             | 4.0758        | Q8NBQ5             |
| DHRS8_HUMAN                                                                                |                  | K.HGLEETAAK.C                 | 2             | 2.6903        | Q8NBQ5             |
| <b><i>Dermatan-sulfate epimerase precursor - Homo sapiens (Human)</i></b>                  |                  |                               |               |               |                    |
| DSE_HUMAN                                                                                  |                  | K.HDLAASC#QGRVVAAEEKNGVVFIR.G | 2             | 2.3118        | Q9UL01             |
| <b><i>Dihydroorotate dehydrogenase, mitochondrial precursor - Homo sapiens (Human)</i></b> |                  |                               |               |               |                    |
| PYRD_HUMAN                                                                                 |                  | R.VPIIGVGGVSSGQDALEK.I        | 2             | 3.0462        | Q02127             |
| <b><i>Dihydropyrimidinase - Homo sapiens (Human)</i></b>                                   |                  |                               |               |               |                    |
| DPYS_HUMAN                                                                                 |                  | K.VVYEAGVFSVTAGDGK.F          | 2             | 2.3684        | Q14117             |
| DPYS_HUMAN                                                                                 |                  | K.VVYEAGVFSVTAGDGK.F          | 2             | 2.4748        | Q14117             |
| <b><i>DNA fragmentation factor subunit alpha - Homo sapiens (Human)</i></b>                |                  |                               |               |               |                    |
| DFFA_HUMAN                                                                                 |                  | K.KTETVQEACERELALR.L          | 2             | 2.4816        | O00273             |
| <b><i>DNA topoisomerase 2-beta - Homo sapiens (Human)</i></b>                              |                  |                               |               |               |                    |
| TOP2B_HUMAN                                                                                |                  | R.HVDYVVDQVVGK.L              | 2             | 2.575         | Q02880             |
| <b><i>DNA-dependent protein kinase catalytic subunit - Homo sapiens (Human)</i></b>        |                  |                               |               |               |                    |
| PRKDC_HUMAN                                                                                |                  | R.MEVQEQEEDISSLIR.S           | 2             | 2.4586        | P78527             |

| <i>Protein</i>                                                                                             | <i>Reference</i> | <i>Peptide sequence</i>         | <i>Charge</i> | <i>XCorr*</i> | <i>Accession**</i> |
|------------------------------------------------------------------------------------------------------------|------------------|---------------------------------|---------------|---------------|--------------------|
|                                                                                                            | PRKDC_HUMAN      | K.NLSSNEAISLEEIR.I              | 2             | 2.772         | P78527             |
|                                                                                                            | PRKDC_HUMAN      | K.LTLPEDNSMNVDDQGDPSDR.M        | 2             | 3.4127        | P78527             |
| <b><i>DNA-directed RNA polymerase III subunit RPC3 - Homo sapiens (Human)</i></b>                          |                  |                                 |               |               |                    |
|                                                                                                            | RPC3_HUMAN       | K.LDASEIQVDETIFLLESYIEC#TM*KR.Q | 2             | 2.342         | Q9BU14             |
| <b><i>DnaJ homolog subfamily C member 13 - Homo sapiens (Human)</i></b>                                    |                  |                                 |               |               |                    |
|                                                                                                            | DNJCD_HUMAN      | R.LGGYLAEEQATPENPTIR.K          | 2             | 2.8644        | O75165             |
| <b><i>Dolichol-phosphate mannosyltransferase subunit 3 - Homo sapiens (Human)</i></b>                      |                  |                                 |               |               |                    |
|                                                                                                            | DPM3_HUMAN       | R.ELQSQIQEAR.A                  | 2             | 2.3657        | Q9P2X0             |
| <b><i>Dolichyl-diphosphooligosaccharide-protein glycosyltransferase - Homo sapiens (Human)</i></b>         |                  |                                 |               |               |                    |
|                                                                                                            | Q5VWA5_HUMA      | K.LPDVYGVFQFK.V                 | 2             | 3.1129        | Q5VWA5             |
|                                                                                                            | Q5VWA5_HUMA      | K.LPDVYGVFQFK.V                 | 2             | 2.8431        | Q5VWA5             |
|                                                                                                            | Q5VWA5_HUMA      | K.LPDVYGVFQFK.V                 | 2             | 2.6395        | Q5VWA5             |
| <b><i>Dolichyl-diphosphooligosaccharide--protein glycosyltransferase 63 kDa subunit precursor - Ho</i></b> |                  |                                 |               |               |                    |
|                                                                                                            | RIB2_HUMAN       | R.SIVEEIEDLVAR.L                | 2             | 3.037         | P04844             |
|                                                                                                            | RIB2_HUMAN       | K.TGQEVVFAEPDNK.N               | 2             | 3.3161        | P04844             |
|                                                                                                            | RIB2_HUMAN       | K.FPEEEAPSTVLSQNLFTPK.Q         | 2             | 2.931         | P04844             |
|                                                                                                            | RIB2_HUMAN       | K.TGQEVVFAEPDNK.N               | 2             | 3.3313        | P04844             |
| <b><i>Dolichyl-diphosphooligosaccharide--protein glycosyltransferase 67 kDa subunit precursor - Ho</i></b> |                  |                                 |               |               |                    |
|                                                                                                            | RIB1_HUMAN       | K.NLVEQHIQDIVVHYTFNK.V          | 3             | 5.0156        | P04843             |
|                                                                                                            | RIB1_HUMAN       | R.FVDHVFDEQVIDSLTVK.I           | 2             | 2.8605        | P04843             |
|                                                                                                            | RIB1_HUMAN       | R.SEDLLDYGPF.R.D                | 2             | 2.3191        | P04843             |
|                                                                                                            | RIB1_HUMAN       | K.NIEIDSPYEISR.A                | 2             | 2.8502        | P04843             |
|                                                                                                            | RIB1_HUMAN       | K.GEDEEENNLEVR.E                | 2             | 2.7637        | P04843             |
|                                                                                                            | RIB1_HUMAN       | K.NIEIDSPYEISR.A                | 2             | 2.7412        | P04843             |
|                                                                                                            | RIB1_HUMAN       | R.HFDETVNR.Y                    | 2             | 2.3938        | P04843             |
|                                                                                                            | RIB1_HUMAN       | K.NIEIDSPYEISR.A                | 2             | 2.6436        | P04843             |
|                                                                                                            | RIB1_HUMAN       | K.GEDEEENNLEVR.E                | 2             | 3.1634        | P04843             |
|                                                                                                            | RIB1_HUMAN       | R.HFDETVNR.Y                    | 2             | 2.4144        | P04843             |
|                                                                                                            | RIB1_HUMAN       | R.FVDHVFDEQVIDSLTVK.I           | 3             | 3.9712        | P04843             |
|                                                                                                            | RIB1_HUMAN       | K.GEDEEENNLEVR.E                | 2             | 2.8297        | P04843             |
|                                                                                                            | RIB1_HUMAN       | K.TEGSDLC#DR.V                  | 2             | 2.5729        | P04843             |
| <b><i>Dolichyl-diphosphooligosaccharide--protein glycosyltransferase subunit DAD1 - Homo sapiens</i></b>   |                  |                                 |               |               |                    |
|                                                                                                            | DAD1_HUMAN       | R.FLEEYLSSTPQR.L                | 2             | 2.8627        | P61803             |
| <b><i>Dual specificity mitogen-activated protein kinase kinase 1 - Homo sapiens (Human)</i></b>            |                  |                                 |               |               |                    |

| <i>Protein</i>                                                                                             | <i>Reference</i> | <i>Peptide sequence</i>   | <i>Charge</i> | <i>XCorr*</i> | <i>Accession**</i> |
|------------------------------------------------------------------------------------------------------------|------------------|---------------------------|---------------|---------------|--------------------|
|                                                                                                            | MP2K1_HUMAN      | K.LPSGVFSLEFQDFVNK.C      | 2             | 4.1568        | Q02750             |
|                                                                                                            | MP2K1_HUMAN      | K.LPSGVFSLEFQDFVNK.C      | 2             | 3.6508        | Q02750             |
| <b><i>Dual specificity mitogen-activated protein kinase kinase 3 - Homo sapiens (Human)</i></b>            |                  |                           |               |               |                    |
|                                                                                                            | MP2K3_HUMAN      | K.NMTIPEDILGEIAVSIVR.A    | 2             | 2.9707        | P46734             |
|                                                                                                            | MP2K3_HUMAN      | K.NMTIPEDILGEIAVSIVR.A    | 2             | 3.172         | P46734             |
|                                                                                                            | MP2K3_HUMAN      | K.QVVEEPSPQLPADR.F        | 2             | 2.3218        | P46734             |
| <b><i>Dynamain-1-like protein - Homo sapiens (Human)</i></b>                                               |                  |                           |               |               |                    |
|                                                                                                            | DNM1L_HUMAN      | R.TLESVDPLGGLNTIDILTAIR.N | 2             | 2.7179        | O00429             |
|                                                                                                            | DNM1L_HUMAN      | R.TLESVDPLGGLNTIDILTAIR.N | 2             | 3.556         | O00429             |
| <b><i>Dynamain-2 - Homo sapiens (Human)</i></b>                                                            |                  |                           |               |               |                    |
|                                                                                                            | DYN2_HUMAN       | K.VPVGDQPPDIEYQIK.D       | 2             | 3.1418        | P50570             |
|                                                                                                            | DYN2_HUMAN       | K.VPVGDQPPDIEYQIK.D       | 2             | 3.5968        | P50570             |
| <b><i>Dynein heavy chain, cytosolic - Homo sapiens (Human)</i></b>                                         |                  |                           |               |               |                    |
|                                                                                                            | DYHC_HUMAN       | R.GIFEALRPLETLPVEGLIR.I   | 2             | 2.7561        | Q14204             |
| <b><i>Dysferlin_v1 - Homo sapiens (Human)</i></b>                                                          |                  |                           |               |               |                    |
|                                                                                                            | Q0H395_HUMAN     | R.PLYSPLQPDIEQGK.L        | 2             | 2.7016        | Q0H395             |
| <b><i>Ecotropic viral integration site 5 protein homolog - Homo sapiens (Human)</i></b>                    |                  |                           |               |               |                    |
|                                                                                                            | EVI5_HUMAN       | K.NAMNELQDELMTIRLR.E      | 2             | 3.1687        | O60447             |
| <b><i>Electron transfer flavoprotein-ubiquinone oxidoreductase, mitochondrial precursor - Homo sap</i></b> |                  |                           |               |               |                    |
|                                                                                                            | ETFD_HUMAN       | K.SGILAAESIFNQLTSENLSK.T  | 2             | 2.6794        | Q16134             |
| <b><i>Elongation factor 1-alpha - Homo sapiens (Human)</i></b>                                             |                  |                           |               |               |                    |
|                                                                                                            | Q6IQ15_HUMAN     | R.EHALLAYSQKR.Y           | 2             | 2.4758        | Q6IQ15             |
| <b><i>Elongation factor 1-alpha 1 - Homo sapiens (Human)</i></b>                                           |                  |                           |               |               |                    |
|                                                                                                            | EF1A1_HUMAN      | R.EHALLAYTLGVK.Q          | 2             | 2.6922        | P68104             |
|                                                                                                            | EF1A1_HUMAN      | R.LPLQDVYK.I              | 2             | 2.3203        | P68104             |
|                                                                                                            | EF1A1_HUMAN      | R.EHALLAYTLGVK.Q          | 2             | 2.5266        | P68104             |
| <b><i>Elongation factor Tu, mitochondrial precursor - Homo sapiens (Human)</i></b>                         |                  |                           |               |               |                    |
|                                                                                                            | EFTU_HUMAN       | R.TIGTGLVTNTLAMTEEEK.N    | 2             | 2.4242        | P49411             |
|                                                                                                            | EFTU_HUMAN       | R.TIGTGLVTNTLAMTEEEK.N    | 2             | 2.3956        | P49411             |
|                                                                                                            | EFTU_HUMAN       | R.TIGTGLVTNTLAM*TEEEK.N   | 2             | 2.5299        | P49411             |
| <b><i>Endoplasmic precursor - Homo sapiens (Human)</i></b>                                                 |                  |                           |               |               |                    |
|                                                                                                            | ENPL_HUMAN       | R.ELISNASDALDK.I          | 2             | 2.5073        | P14625             |
| <b><i>Enoyl-CoA hydratase domain-containing protein 1 - Homo sapiens (Human)</i></b>                       |                  |                           |               |               |                    |



| <i>Protein</i>                                                                            | <i>Reference</i> | <i>Peptide sequence</i>            | <i>Charge</i> | <i>XCorr*</i> | <i>Accession**</i> |
|-------------------------------------------------------------------------------------------|------------------|------------------------------------|---------------|---------------|--------------------|
|                                                                                           | ECHD1_HUMAN      | R.M*NAFSGVMM*LQLLEK.V              | 2             | 2.8276        | Q9NTX5             |
|                                                                                           | ECHD1_HUMAN      | R.M*NAFSGVMM*LQLLEK.V              | 2             | 2.7354        | Q9NTX5             |
| <b><i>ERGIC-53 protein precursor - Homo sapiens (Human)</i></b>                           |                  |                                    |               |               |                    |
|                                                                                           | LMAN1_HUMAN      | R.LVSGMQHPGSAGGVYETTQHFDIK.E       | 3             | 4.0085        | P49257             |
|                                                                                           | LMAN1_HUMAN      | K.GHPDLQGQPAEEIFESVGDR.E           | 3             | 3.8352        | P49257             |
| <b><i>Erlin-1 precursor - Homo sapiens (Human)</i></b>                                    |                  |                                    |               |               |                    |
|                                                                                           | ERLN1_HUMAN      | K.EALEPSGENVIQNK.E                 | 2             | 2.8721        | O75477             |
|                                                                                           | ERLN1_HUMAN      | R.SVQTTLQTDEVK.N                   | 2             | 2.8525        | O75477             |
|                                                                                           | ERLN1_HUMAN      | R.SVQTTLQTDEVK.N                   | 2             | 2.7322        | O75477             |
| <b><i>Erlin-2 precursor - Homo sapiens (Human)</i></b>                                    |                  |                                    |               |               |                    |
|                                                                                           | ERLN2_HUMAN      | K.LSFGLEDEPLETATK.E                | 2             | 3.0559        | O94905             |
|                                                                                           | ERLN2_HUMAN      | K.LSFGLEDEPLETATK.E                | 2             | 2.5243        | O94905             |
| <b><i>Erythrocyte band 7 integral membrane protein - Homo sapiens (Human)</i></b>         |                  |                                    |               |               |                    |
|                                                                                           | STOM_HUMAN       | R.YLQTLTTIAAEK.N                   | 2             | 2.4892        | P27105             |
|                                                                                           | STOM_HUMAN       | K.NSTIVFPLPIDMLQGIGAK.H            | 2             | 3.1192        | P27105             |
|                                                                                           | STOM_HUMAN       | K.NLSQILSDREEIAHNMQSTLDDATDAWGIK.V | 3             | 4.1055        | P27105             |
|                                                                                           | STOM_HUMAN       | R.VQNATLAVANITNADSATR.L            | 2             | 2.8131        | P27105             |
|                                                                                           | STOM_HUMAN       | R.TISFDIPPQEILTK.D                 | 2             | 2.578         | P27105             |
|                                                                                           | STOM_HUMAN       | R.VQNATLAVANITNADSATR.L            | 2             | 3.8918        | P27105             |
|                                                                                           | STOM_HUMAN       | R.YLQTLTTIAAEK.N                   | 2             | 2.6729        | P27105             |
|                                                                                           | STOM_HUMAN       | R.YLQTLTTIAAEK.N                   | 2             | 2.4982        | P27105             |
|                                                                                           | STOM_HUMAN       | K.NSTIVFPLPIDMLQGIGAK.H            | 2             | 2.9082        | P27105             |
|                                                                                           | STOM_HUMAN       | R.TISFDIPPQEILTK.D                 | 2             | 2.4943        | P27105             |
|                                                                                           | STOM_HUMAN       | R.TISFDIPPQEILTK.D                 | 2             | 2.6765        | P27105             |
| <b><i>Esophageal cancer associated protein - Homo sapiens (Human)</i></b>                 |                  |                                    |               |               |                    |
|                                                                                           | Q6PDA0_HUMA      | R.TRLEELDDFEESQK.E                 | 2             | 2.5662        | Q6PDA0             |
| <b><i>Estradiol 17-beta-dehydrogenase 12 - Homo sapiens (Human)</i></b>                   |                  |                                    |               |               |                    |
|                                                                                           | DHB12_HUMAN      | K.DKLDQVSSEIK.E                    | 2             | 2.5506        | Q53GQ0             |
|                                                                                           | DHB12_HUMAN      | R.TIAVDFASEDIYDK.I                 | 2             | 2.7648        | Q53GQ0             |
|                                                                                           | DHB12_HUMAN      | R.TIAVDFASEDIYDK.I                 | 2             | 3.0326        | Q53GQ0             |
| <b><i>Eukaryotic initiation factor 4A-I - Homo sapiens (Human)</i></b>                    |                  |                                    |               |               |                    |
|                                                                                           | IF4A1_HUMAN      | K.GYDVIAQAQSGTGK.T                 | 2             | 2.4418        | P60842             |
| <b><i>Eukaryotic translation initiation factor 3 subunit 5 - Homo sapiens (Human)</i></b> |                  |                                    |               |               |                    |
|                                                                                           | IF35_HUMAN       | R.IQDALSTVLQYAEDVLSGK.V            | 3             | 5.0048        | O00303             |

| <i>Protein</i>                                                                                       | <i>Reference</i> | <i>Peptide sequence</i>    | <i>Charge</i> | <i>XCorr*</i> | <i>Accession**</i> |
|------------------------------------------------------------------------------------------------------|------------------|----------------------------|---------------|---------------|--------------------|
| <b><i>EVI2B protein precursor - Homo sapiens (Human)</i></b>                                         |                  |                            |               |               |                    |
| EVI2B_HUMAN                                                                                          |                  | R.SPFADGETPDIC#MDNIR.E     | 2             | 4.1159        | P34910             |
| EVI2B_HUMAN                                                                                          |                  | K.LFESSENIEDSNNPK.T        | 2             | 4.4448        | P34910             |
| EVI2B_HUMAN                                                                                          |                  | R.SPFADGETPDIC#M*DNIR.E    | 2             | 2.3286        | P34910             |
| EVI2B_HUMAN                                                                                          |                  | R.SPFADGETPDIC#MDNIR.E     | 2             | 3.5217        | P34910             |
| EVI2B_HUMAN                                                                                          |                  | K.LFESSENIEDSNNPK.T        | 2             | 3.8501        | P34910             |
| EVI2B_HUMAN                                                                                          |                  | R.SPFADGETPDIC#MDNIR.E     | 2             | 4.0955        | P34910             |
| EVI2B_HUMAN                                                                                          |                  | K.LFESSENIEDSNNPK.T        | 2             | 2.6506        | P34910             |
| <b><i>Exportin-2 - Homo sapiens (Human)</i></b>                                                      |                  |                            |               |               |                    |
| XPO2_HUMAN                                                                                           |                  | K.LLQTDDEEEAGLLELLK.S      | 2             | 3.6692        | P55060             |
| XPO2_HUMAN                                                                                           |                  | K.IPGLLGVFQK.L             | 2             | 2.6059        | P55060             |
| XPO2_HUMAN                                                                                           |                  | K.LLQTDDEEEAGLLELLK.S      | 2             | 3.7176        | P55060             |
| <b><i>Fatty aldehyde dehydrogenase - Homo sapiens (Human)</i></b>                                    |                  |                            |               |               |                    |
| AL3A2_HUMAN                                                                                          |                  | K.NVDEAINFINER.E           | 2             | 2.3645        | P51648             |
| <b><i>Filamin-A - Homo sapiens (Human)</i></b>                                                       |                  |                            |               |               |                    |
| FLNA_HUMAN                                                                                           |                  | K.YTPVQQGPVGVNVVYGGDPIPK.S | 2             | 3.3393        | P21333             |
| FLNA_HUMAN                                                                                           |                  | K.VTAQGPGLPSGNIANK.T       | 2             | 2.562         | P21333             |
| FLNA_HUMAN                                                                                           |                  | R.EAGAGGLAIAVEGPSK.A       | 2             | 3.4309        | P21333             |
| FLNA_HUMAN                                                                                           |                  | K.VTAQGPGLPSGNIANK.T       | 2             | 3.2589        | P21333             |
| FLNA_HUMAN                                                                                           |                  | R.SPYTVTVGQAC#NPSAC#R.A    | 2             | 2.9662        | P21333             |
| <b><i>FLJ00121 protein - Homo sapiens (Human)</i></b>                                                |                  |                            |               |               |                    |
| Q8TES2_HUMA                                                                                          |                  | K.EGLAVAEELVDHVAELTATPR.D  | 3             | 3.9239        | Q8TES2             |
| Q8TES2_HUMA                                                                                          |                  | K.EGLAVAEELVDHVAELTATPR.D  | 3             | 3.8368        | Q8TES2             |
| <b><i>Formin-like protein 1 - Homo sapiens (Human)</i></b>                                           |                  |                            |               |               |                    |
| FMNL_HUMAN                                                                                           |                  | K.VLQELDMSEDFEEQFK.T       | 2             | 3.5916        | O95466             |
| FMNL_HUMAN                                                                                           |                  | K.NAVLEHMEELQEQQVALLTER.L  | 2             | 4.7587        | O95466             |
| FMNL_HUMAN                                                                                           |                  | K.VLQELDM*SEDFEEQFK.T      | 2             | 2.4959        | O95466             |
| <b><i>Full-length cDNA clone CS0DI085YI08 of Placenta of Homo sapiens - Homo sapiens (Human)</i></b> |                  |                            |               |               |                    |
| Q86TV4_HUMAN                                                                                         |                  | R.PTC#PSSSGGPARELSSRLR.I   | 2             | 2.5759        | Q86TV4             |
| <b><i>Gasdermin domain-containing protein 1 - Homo sapiens (Human)</i></b>                           |                  |                            |               |               |                    |
| GSDC1_HUMAN                                                                                          |                  | K.DILEPDAAEPDVQR.G         | 2             | 2.5047        | P57764             |
| <b><i>GCN1-like protein 1 - Homo sapiens (Human)</i></b>                                             |                  |                            |               |               |                    |
| GCN1L_HUMAN                                                                                          |                  | K.NIVSLLLSMLGHDEDNTR.I     | 2             | 3.6647        | Q92616             |
| GCN1L_HUMAN                                                                                          |                  | K.NIVSLLLSMLGHDEDNTR.I     | 2             | 5.2816        | Q92616             |

| <i>Protein</i>                                                                                | <i>Reference</i> | <i>Peptide sequence</i>        | <i>Charge</i> | <i>XCorr*</i> | <i>Accession**</i> |
|-----------------------------------------------------------------------------------------------|------------------|--------------------------------|---------------|---------------|--------------------|
| <b><i>GEM-interacting protein - Homo sapiens (Human)</i></b>                                  |                  |                                |               |               |                    |
|                                                                                               | GMIP_HUMAN       | R.SQGSPEDESAPQASPGPSK.Q        | 2             | 2.4976        | Q9P107             |
| <b><i>Glutathione S-transferase kappa 1 - Homo sapiens (Human)</i></b>                        |                  |                                |               |               |                    |
|                                                                                               | GSTK1_HUMAN      | R.NEDITEPQSILAAAEK.A           | 2             | 2.9858        | Q9Y2Q3             |
|                                                                                               | GSTK1_HUMAN      | R.NEDITEPQSILAAAEK.A           | 2             | 3.7887        | Q9Y2Q3             |
| <b><i>Golgi-associated plant pathogenesis-related protein 1 - Homo sapiens (Human)</i></b>    |                  |                                |               |               |                    |
|                                                                                               | GAPR1_HUMAN      | R.EAQQYSEALASTR.I              | 2             | 3.0191        | Q9H4G4             |
|                                                                                               | GAPR1_HUMAN      | R.EAQQYSEALASTR.I              | 2             | 2.8332        | Q9H4G4             |
|                                                                                               | GAPR1_HUMAN      | R.EAQQYSEALASTR.I              | 2             | 2.943         | Q9H4G4             |
|                                                                                               | GAPR1_HUMAN      | R.EAQQYSEALASTR.I              | 2             | 2.8961        | Q9H4G4             |
| <b><i>GPI transamidase component PIG-S - Homo sapiens (Human)</i></b>                         |                  |                                |               |               |                    |
|                                                                                               | PIGS_HUMAN       | R.SVENLATATTTLSLAQLLQK.I       | 2             | 3.2225        | Q96S52             |
| <b><i>GTPase IMAP family member 1 - Homo sapiens (Human)</i></b>                              |                  |                                |               |               |                    |
|                                                                                               | GIMA1_HUMAN      | K.MATDEENVYGLEENAQSR.Q         | 2             | 3.8996        | Q8WWP7             |
|                                                                                               | GIMA1_HUMAN      | R.EQEAQVEQLLGMVEGLVLEHK.G      | 2             | 3.1408        | Q8WWP7             |
|                                                                                               | GIMA1_HUMAN      | K.MATDEENVYGLEENAQSR.Q         | 2             | 3.9364        | Q8WWP7             |
|                                                                                               | GIMA1_HUMAN      | K.MATDEENVYGLEENAQSR.Q         | 2             | 2.3763        | Q8WWP7             |
|                                                                                               | GIMA1_HUMAN      | K.MATDEENVYGLEENAQSR.Q         | 2             | 2.5122        | Q8WWP7             |
|                                                                                               | GIMA1_HUMAN      | R.EQEAQVEQLLGMVEGLVLEHK.G      | 2             | 3.8522        | Q8WWP7             |
| <b><i>GTPase IMAP family member 4 - Homo sapiens (Human)</i></b>                              |                  |                                |               |               |                    |
|                                                                                               | GIMA4_HUMAN      | R.EAPEDIQDLMDIFGDR.Y           | 2             | 3.8313        | Q9NUV9             |
|                                                                                               | GIMA4_HUMAN      | R.EAPEDIQDLMDIFGDR.Y           | 2             | 2.6685        | Q9NUV9             |
| <b><i>Guanine nucleotide-binding protein G(i), alpha-2 subunit - Homo sapiens (Human)</i></b> |                  |                                |               |               |                    |
|                                                                                               | GNAI2_HUMAN      | R.QLFALSC#TAEEQGVLPDDLQSGVIR.R | 2             | 3.83          | P04899             |
|                                                                                               | GNAI2_HUMAN      | K.YDEAASYIQSK.F                | 2             | 2.8459        | P04899             |
|                                                                                               | GNAI2_HUMAN      | K.YDEAASYIQSK.F                | 2             | 2.689         | P04899             |
|                                                                                               | GNAI2_HUMAN      | R.QLFALSC#TAEEQGVLPDDLQSGVIR.R | 2             | 3.0653        | P04899             |
|                                                                                               | GNAI2_HUMAN      | K.YDEAASYIQSK.F                | 2             | 3.1257        | P04899             |
| <b><i>Heat shock protein HSP 90-alpha - Homo sapiens (Human)</i></b>                          |                  |                                |               |               |                    |
|                                                                                               | HS90A_HUMAN      | R.APFDFENR.K                   | 2             | 2.9465        | P07900             |
|                                                                                               | HS90A_HUMAN      | R.NPDDITNEEYGEFYK.S            | 2             | 2.8114        | P07900             |
| <b><i>Heat shock protein HSP 90-beta - Homo sapiens (Human)</i></b>                           |                  |                                |               |               |                    |
|                                                                                               | HS90B_HUMAN      | K.HLEINPDHPIVETLR.Q            | 3             | 3.8039        | P08238             |
|                                                                                               | HS90B_HUMAN      | R.GFEVVYMTPEIDEYC#VQQLK.E      | 2             | 2.5953        | P08238             |

| <i>Protein</i>                                                                                          | <i>Reference</i> | <i>Peptide sequence</i>               | <i>Charge</i> | <i>XCorr*</i> | <i>Accession**</i> |
|---------------------------------------------------------------------------------------------------------|------------------|---------------------------------------|---------------|---------------|--------------------|
|                                                                                                         | HS90B_HUMAN      | R.NPDDITQEEYGEFYK.S                   | 2             | 4.3726        | P08238             |
|                                                                                                         | HS90B_HUMAN      | R.NPDDITQEEYGEFYK.S                   | 2             | 3.8581        | P08238             |
| <b><i>Heterogeneous nuclear ribonucleoprotein H - Homo sapiens (Human)</i></b>                          |                  |                                       |               |               |                    |
|                                                                                                         | HNRH1_HUMAN      | R.STGEAFVQFASQEIAEK.A                 | 2             | 3.55          | P31943             |
| <b><i>Heterogeneous nuclear ribonucleoprotein K - Homo sapiens (Human)</i></b>                          |                  |                                       |               |               |                    |
|                                                                                                         | HNRPK_HUMAN      | R.TDYNASVSPDSSGPER.I                  | 2             | 3.1021        | P61978             |
|                                                                                                         | HNRPK_HUMAN      | R.TDYNASVSPDSSGPER.I                  | 2             | 3.5951        | P61978             |
|                                                                                                         | HNRPK_HUMAN      | R.TDYNASVSPDSSGPER.I                  | 2             | 3.6595        | P61978             |
|                                                                                                         | HNRPK_HUMAN      | R.TDYNASVSPDSSGPER.I                  | 2             | 2.424         | P61978             |
| <b><i>Heterogeneous nuclear ribonucleoprotein U-like protein 2 - Homo sapiens (Human)</i></b>           |                  |                                       |               |               |                    |
|                                                                                                         | HNRL2_HUMAN      | R.DLLVQQASQC#LSK.L                    | 2             | 2.6555        | Q1KMD3             |
|                                                                                                         | HNRL2_HUMAN      | R.DLLVQQASQC#LSK.L                    | 2             | 3.2113        | Q1KMD3             |
|                                                                                                         | HNRL2_HUMAN      | R.DLLVQQASQC#LSK.L                    | 2             | 3.0462        | Q1KMD3             |
| <b><i>Hexokinase-1 - Homo sapiens (Human)</i></b>                                                       |                  |                                       |               |               |                    |
|                                                                                                         | HXK1_HUMAN       | R.HIDLVEGDEGR.M                       | 2             | 3.0338        | P19367             |
| <b><i>Hexokinase-3 - Homo sapiens (Human)</i></b>                                                       |                  |                                       |               |               |                    |
|                                                                                                         | HXK3_HUMAN       | R.FDASVDQASINPGK.Q                    | 2             | 3.5046        | P52790             |
| <b><i>HFMI protein - Homo sapiens (Human)</i></b>                                                       |                  |                                       |               |               |                    |
|                                                                                                         | A2RUB2_HUMA      | K.ALC#SQRFDWKEK.F                     | 2             | 2.5498        | A2RUB2             |
| <b><i>High affinity immunoglobulin epsilon receptor subunit gamma precursor - Homo sapiens (Hu)</i></b> |                  |                                       |               |               |                    |
|                                                                                                         | FCERG_HUMAN      | R.NQETYETLK.H                         | 2             | 2.4784        | P30273             |
|                                                                                                         | FCERG_HUMAN      | K.SDGVYTGLSTR.N                       | 2             | 2.8191        | P30273             |
|                                                                                                         | FCERG_HUMAN      | K.SDGVYTGLSTR.N                       | 2             | 2.6658        | P30273             |
|                                                                                                         | FCERG_HUMAN      | K.SDGVYTGLSTR.N                       | 2             | 2.5197        | P30273             |
| <b><i>Histocompatibility - Homo sapiens (Human)</i></b>                                                 |                  |                                       |               |               |                    |
|                                                                                                         | Q6P189_HUMAN     | R.SPLTAASPGELPTEGAGPDVVEDISHLLADVAR.F | 3             | 4.7           | Q6P189             |
| <b><i>Histone H2A type 1-A - Homo sapiens (Human)</i></b>                                               |                  |                                       |               |               |                    |
|                                                                                                         | H2A1A_HUMAN      | R.HLQLAIR.N                           | 2             | 2.3005        | Q96QV6             |
|                                                                                                         | H2A1A_HUMAN      | R.NDEELNK.L                           | 2             | 2.4062        | Q96QV6             |
|                                                                                                         | H2A1A_HUMAN      | R.HLQLAIR.N                           | 2             | 2.3853        | Q96QV6             |
|                                                                                                         | H2A1A_HUMAN      | R.HLQLAIR.N                           | 2             | 2.3552        | Q96QV6             |
|                                                                                                         | H2A1A_HUMAN      | R.HLQLAIR.N                           | 2             | 2.3463        | Q96QV6             |
| <b><i>Histone H2A type 1-B - Homo sapiens (Human)</i></b>                                               |                  |                                       |               |               |                    |
|                                                                                                         | H2A1B_HUMAN      | R.VGAGAPVYLAHVLEYLTAEILELAGNAAR.D     | 2             | 4.9576        | P04908             |

| <i>Protein</i>                                                                                         | <i>Reference</i> | <i>Peptide sequence</i>                | <i>Charge</i> | <i>XCorr*</i> | <i>Accession**</i> |
|--------------------------------------------------------------------------------------------------------|------------------|----------------------------------------|---------------|---------------|--------------------|
| H2A1B_HUMAN                                                                                            |                  | R.VGAGAPVYLAADVLELYLTAEILELAGNAAR.D    | 4             | 6.1809        | P04908             |
| H2A1B_HUMAN                                                                                            |                  | R.VGAGAPVYLAADVLELYLTAEILELAGNAAR.D    | 2             | 5.2091        | P04908             |
| H2A1B_HUMAN                                                                                            |                  | R.VGAGAPVYLAADVLELYLTAEILELAGNAAR.D    | 4             | 5.7893        | P04908             |
| H2A1B_HUMAN                                                                                            |                  | R.VGAGAPVYLAADVLELYLTAEILELAGNAAR.D    | 4             | 5.1966        | P04908             |
| H2A1B_HUMAN                                                                                            |                  | R.VGAGAPVYLAADVLELYLTAEILELAGNAAR.D    | 4             | 4.7811        | P04908             |
| <b><i>Histone H2A type 2-A - Homo sapiens (Human)</i></b>                                              |                  |                                        |               |               |                    |
| H2A2A_HUMAN                                                                                            |                  | R.VGAGAPVYMAADVLELYLTAEILELAGNAAR.D    | 2             | 4.9025        | Q6F113             |
| H2A2A_HUMAN                                                                                            |                  | R.VGAGAPVYM*AAVLELYLTAEILELAGNAAR.D    | 2             | 3.9524        | Q6F113             |
| H2A2A_HUMAN                                                                                            |                  | R.VGAGAPVYM*AAVLELYLTAEILELAGNAAR.D    | 2             | 4.0714        | Q6F113             |
| H2A2A_HUMAN                                                                                            |                  | R.VGAGAPVYMAADVLELYLTAEILELAGNAAR.D    | 2             | 4.8799        | Q6F113             |
| <b><i>Histone H2AV - Homo sapiens (Human)</i></b>                                                      |                  |                                        |               |               |                    |
| H2AV_HUMAN                                                                                             |                  | R.GDEELDSLK.A                          | 2             | 2.3731        | Q71UI9             |
| H2AV_HUMAN                                                                                             |                  | R.GDEELDSLK.A                          | 2             | 2.605         | Q71UI9             |
| <b><i>Histone H3.1 - Homo sapiens (Human)</i></b>                                                      |                  |                                        |               |               |                    |
| H31_HUMAN                                                                                              |                  | R.FQSSAVMALQEAC#EAYLVGLFEDTNLC#AIHAK.R | 3             | 4.1636        | P68431             |
| <b><i>Histone H4 - Homo sapiens (Human)</i></b>                                                        |                  |                                        |               |               |                    |
| H4_HUMAN                                                                                               |                  | R.DAVTYTEHAK.R                         | 2             | 2.305         | P62805             |
| H4_HUMAN                                                                                               |                  | K.TVTAM*DVVYALK.R                      | 2             | 2.4806        | P62805             |
| H4_HUMAN                                                                                               |                  | R.DNIQGITKPAIR.R                       | 2             | 3.2016        | P62805             |
| H4_HUMAN                                                                                               |                  | K.TVTAMDVVYALK.R                       | 2             | 3.4367        | P62805             |
| H4_HUMAN                                                                                               |                  | R.DNIQGITKPAIR.R                       | 2             | 3.2482        | P62805             |
| H4_HUMAN                                                                                               |                  | K.TVTAMDVVYALK.R                       | 2             | 2.8581        | P62805             |
| H4_HUMAN                                                                                               |                  | R.DNIQGITKPAIR.R                       | 2             | 3.0424        | P62805             |
| H4_HUMAN                                                                                               |                  | R.DNIQGITKPAIR.R                       | 2             | 3.3493        | P62805             |
| H4_HUMAN                                                                                               |                  | K.TVTAM*DVVYALK.R                      | 2             | 2.4437        | P62805             |
| H4_HUMAN                                                                                               |                  | R.DNIQGITKPAIR.R                       | 2             | 3.1408        | P62805             |
| <b><i>HLA class I histocompatibility antigen, A-1 alpha chain precursor - Homo sapiens (Human)</i></b> |                  |                                        |               |               |                    |
| 1A01_HUMAN                                                                                             |                  | R.DGEDQTQDTELVETR.P                    | 2             | 4.0365        | P30443             |
| 1A01_HUMAN                                                                                             |                  | R.DGEDQTQDTELVETRPAGDGTFFQK.W          | 3             | 3.7702        | P30443             |
| 1A01_HUMAN                                                                                             |                  | R.DGEDQTQDTELVETR.P                    | 2             | 3.5263        | P30443             |
| 1A01_HUMAN                                                                                             |                  | R.DGEDQTQDTELVETR.P                    | 2             | 5.0987        | P30443             |
| 1A01_HUMAN                                                                                             |                  | R.APWIEQEGPEYWDQETR.N                  | 2             | 3.2609        | P30443             |
| <b><i>HLA class I histocompatibility antigen, A-2 alpha chain precursor - Homo sapiens (Human)</i></b> |                  |                                        |               |               |                    |
| 1A02_HUMAN                                                                                             |                  | R.FSDAASQR.M                           | 2             | 2.5787        | P01892             |

| <i>Protein</i>                                                                                          | <i>Reference</i> | <i>Peptide sequence</i>   | <i>Charge</i> | <i>XCorr*</i> | <i>Accession**</i> |
|---------------------------------------------------------------------------------------------------------|------------------|---------------------------|---------------|---------------|--------------------|
| <b><i>HLA class I histocompatibility antigen, A-25 alpha chain precursor - Homo sapiens (Human)</i></b> |                  |                           |               |               |                    |
| 1A25_HUMAN                                                                                              |                  | R.APWIEQEGPEYWDR.N        | 2             | 3.0361        | P18462             |
| 1A25_HUMAN                                                                                              |                  | R.APWIEQEGPEYWDR.N        | 2             | 3.7456        | P18462             |
| 1A25_HUMAN                                                                                              |                  | R.APWIEQEGPEYWDR.N        | 2             | 3.9579        | P18462             |
| 1A25_HUMAN                                                                                              |                  | R.APWIEQEGPEYWDR.N        | 2             | 3.6625        | P18462             |
| <b><i>HLA class II histocompatibility antigen gamma chain - Homo sapiens (Human)</i></b>                |                  |                           |               |               |                    |
| HG2A_HUMAN                                                                                              |                  | R.DLISNNEQLPMLGR.R        | 2             | 2.5213        | P04233             |
| HG2A_HUMAN                                                                                              |                  | R.DLISNNEQLPMLGR.R        | 2             | 3.0894        | P04233             |
| HG2A_HUMAN                                                                                              |                  | R.DLISNNEQLPMLGR.R        | 2             | 2.7821        | P04233             |
| HG2A_HUMAN                                                                                              |                  | R.DLISNNEQLPMLGR.R        | 2             | 2.5326        | P04233             |
| HG2A_HUMAN                                                                                              |                  | R.DLISNNEQLPMLGR.R        | 2             | 2.9254        | P04233             |
| <b><i>HLA class II histocompatibility antigen, DR alpha chain precursor - Homo sapiens (Human)</i></b>  |                  |                           |               |               |                    |
| 2DRA_HUMAN                                                                                              |                  | R.FASFEAQGALANIAVDK.A     | 2             | 4.2577        | P01903             |
| 2DRA_HUMAN                                                                                              |                  | R.FASFEAQGALANIAVDK.A     | 2             | 4.2646        | P01903             |
| 2DRA_HUMAN                                                                                              |                  | R.FASFEAQGALANIAVDK.A     | 2             | 4.3054        | P01903             |
| <b><i>Hsp90 co-chaperone Cdc37 - Homo sapiens (Human)</i></b>                                           |                  |                           |               |               |                    |
| CDC37_HUMAN                                                                                             |                  | R.LGPGGLDPVEVYESLPEELQK.C | 2             | 3.897         | Q16543             |
| <b><i>IgG receptor FcRn large subunit p51 precursor - Homo sapiens (Human)</i></b>                      |                  |                           |               |               |                    |
| FCGRN_HUMAN                                                                                             |                  | R.GDDTGVLPTPGEAQDADLK.D   | 2             | 2.581         | P55899             |
| <b><i>Immediate early response 3-interacting protein 1 - Homo sapiens (Human)</i></b>                   |                  |                           |               |               |                    |
| IR3IP_HUMAN                                                                                             |                  | K.NIGWGTDQGIGGFGEPEGIK.S  | 2             | 3.4964        | Q9Y5U9             |
| IR3IP_HUMAN                                                                                             |                  | K.NIGWGTDQGIGGFGEPEGIK.S  | 2             | 2.4238        | Q9Y5U9             |
| <b><i>Immunoglobulin J chain - Homo sapiens (Human)</i></b>                                             |                  |                           |               |               |                    |
| IGJ_HUMAN                                                                                               |                  | -.QEDERIVLVDNK.C          | 2             | 2.5603        | P01591             |
| <b><i>Induced by contact to basement membrane 1 protein - Homo sapiens (Human)</i></b>                  |                  |                           |               |               |                    |
| ICB1_HUMAN                                                                                              |                  | K.IPSTLEVDVEDVTASSR.H     | 2             | 2.9197        | Q5TEJ8             |
| ICB1_HUMAN                                                                                              |                  | K.IPSTLEVDVEDVTASSR.H     | 2             | 3.3185        | Q5TEJ8             |
| ICB1_HUMAN                                                                                              |                  | K.IPSTLEVDVEDVTASSR.H     | 2             | 3.5795        | Q5TEJ8             |
| ICB1_HUMAN                                                                                              |                  | K.IPSTLEVDVEDVTASSR.H     | 2             | 2.3477        | Q5TEJ8             |
| ICB1_HUMAN                                                                                              |                  | K.IPSTLEVDVEDVTASSR.H     | 2             | 3.438         | Q5TEJ8             |
| <b><i>Inhibitor of nuclear factor kappa-B kinase subunit beta - Homo sapiens (Human)</i></b>            |                  |                           |               |               |                    |
| IKKB_HUMAN                                                                                              |                  | R.EGAILTLLSDIASALR.Y      | 2             | 2.4566        | O14920             |
| <b><i>Integrin alpha-IIb precursor - Homo sapiens (Human)</i></b>                                       |                  |                           |               |               |                    |
| ITA2B_HUMAN                                                                                             |                  | R.NRPPLEEDDEEGE.-         | 2             | 3.0358        | P08514             |

| <i>Protein</i>                                                           | <i>Reference</i> | <i>Peptide sequence</i> | <i>Charge</i> | <i>XCorr*</i> | <i>Accession**</i> |
|--------------------------------------------------------------------------|------------------|-------------------------|---------------|---------------|--------------------|
|                                                                          | ITA2B_HUMAN      | R.DGYNDIAVAAPYGGPSGR.G  | 2             | 2.7262        | P08514             |
|                                                                          | ITA2B_HUMAN      | R.NRPPEEDDEEGE.-        | 2             | 3.4577        | P08514             |
|                                                                          | ITA2B_HUMAN      | R.NRPPEEDDEEGE.-        | 2             | 3.4194        | P08514             |
|                                                                          | ITA2B_HUMAN      | R.NRPPEEDDEEGE.-        | 2             | 2.674         | P08514             |
| <b><i>Integrin alpha-L precursor - Homo sapiens (Human)</i></b>          |                  |                         |               |               |                    |
|                                                                          | ITAL_HUMAN       | K.VLIITDGEATDSGNIDAAK.D | 2             | 2.8907        | P20701             |
|                                                                          | ITAL_HUMAN       | K.ADLQDDTFIGNEPLTPEVR.A | 2             | 2.6961        | P20701             |
| <b><i>Integrin alpha-M precursor - Homo sapiens (Human)</i></b>          |                  |                         |               |               |                    |
|                                                                          | ITAM_HUMAN       | R.LPSHSDFLAELR.K        | 2             | 2.727         | P11215             |
|                                                                          | ITAM_HUMAN       | K.LTDVAIGAPGEEDNR.G     | 2             | 3.0424        | P11215             |
|                                                                          | ITAM_HUMAN       | R.LPSHSDFLAELR.K        | 2             | 2.3048        | P11215             |
|                                                                          | ITAM_HUMAN       | K.FGDPLGYEDVIPEADR.E    | 2             | 2.9043        | P11215             |
|                                                                          | ITAM_HUMAN       | K.FGDPLGYEDVIPEADR.E    | 2             | 3.0858        | P11215             |
|                                                                          | ITAM_HUMAN       | K.FGDPLGYEDVIPEADR.E    | 2             | 3.3551        | P11215             |
|                                                                          | ITAM_HUMAN       | K.FGDPLGYEDVIPEADR.E    | 2             | 2.7179        | P11215             |
|                                                                          | ITAM_HUMAN       | R.LPSHSDFLAELR.K        | 2             | 3.0381        | P11215             |
|                                                                          | ITAM_HUMAN       | R.LPSHSDFLAELR.K        | 3             | 4.0661        | P11215             |
|                                                                          | ITAM_HUMAN       | K.LTDVAIGAPGEEDNR.G     | 2             | 3.8306        | P11215             |
|                                                                          | ITAM_HUMAN       | R.LPSHSDFLAELR.K        | 2             | 2.7186        | P11215             |
|                                                                          | ITAM_HUMAN       | K.LTDVAIGAPGEEDNR.G     | 2             | 3.0653        | P11215             |
| <b><i>Integrin beta chain, beta 2 variant - Homo sapiens (Human)</i></b> |                  |                         |               |               |                    |
|                                                                          | Q59H50_HUMAN     | K.SAVGELSESSNVVHLIK.N   | 2             | 3.8836        | Q59H50             |
|                                                                          | Q59H50_HUMAN     | K.SAVGELSESSNVVHLIK.N   | 2             | 2.9758        | Q59H50             |
|                                                                          | Q59H50_HUMAN     | K.SAVGELSESSNVVHLIK.N   | 2             | 4.3463        | Q59H50             |
|                                                                          | Q59H50_HUMAN     | K.SAVGELSESSNVVHLIK.N   | 2             | 3.7253        | Q59H50             |
|                                                                          | Q59H50_HUMAN     | K.SAVGELSESSNVVHLIK.N   | 2             | 3.8638        | Q59H50             |
|                                                                          | Q59H50_HUMAN     | K.SAVGELSESSNVVHLIK.N   | 2             | 4.0036        | Q59H50             |
| <b><i>Integrin beta-2 precursor - Homo sapiens (Human)</i></b>           |                  |                         |               |               |                    |
|                                                                          | ITB2_HUMAN       | R.TTEGC#LNPR.R          | 2             | 2.4899        | P05107             |
| <b><i>Integrin beta-3 precursor - Homo sapiens (Human)</i></b>           |                  |                         |               |               |                    |
|                                                                          | ITB3_HUMAN       | K.GSGDSSQVTQVSPQR.I     | 2             | 3.4558        | P05106             |
|                                                                          | ITB3_HUMAN       | K.GSGDSSQVTQVSPQR.I     | 2             | 3.896         | P05106             |
|                                                                          | ITB3_HUMAN       | K.GSGDSSQVTQVSPQR.I     | 2             | 3.4734        | P05106             |
|                                                                          | ITB3_HUMAN       | K.GSGDSSQVTQVSPQR.I     | 2             | 2.9107        | P05106             |
|                                                                          | ITB3_HUMAN       | R.NDASHLLVFTTDAK.T      | 2             | 4.155         | P05106             |

| <i>Protein</i>                                                                   | <i>Reference</i> | <i>Peptide sequence</i>        | <i>Charge</i> | <i>XCorr*</i> | <i>Accession**</i> |
|----------------------------------------------------------------------------------|------------------|--------------------------------|---------------|---------------|--------------------|
| ITB3_HUMAN                                                                       |                  | K.IGDTVVSFSIEAK.V              | 2             | 2.8902        | P05106             |
| ITB3_HUMAN                                                                       |                  | K.IGDTVVSFSIEAK.V              | 2             | 2.7708        | P05106             |
| ITB3_HUMAN                                                                       |                  | K.IGDTVVSFSIEAK.V              | 2             | 2.5078        | P05106             |
| ITB3_HUMAN                                                                       |                  | K.GSGDSSQVTQVSPQR.I            | 2             | 3.7582        | P05106             |
| ITB3_HUMAN                                                                       |                  | K.GSGDSSQVTQVSPQR.I            | 2             | 3.5792        | P05106             |
| ITB3_HUMAN                                                                       |                  | K.IGDTVVSFSIEAK.V              | 2             | 2.6218        | P05106             |
| <b><i>Intercellular adhesion molecule 2 precursor - Homo sapiens (Human)</i></b> |                  |                                |               |               |                    |
| ICAM2_HUMAN                                                                      |                  | R.VPTVEPLDSLTLFLFR.G           | 2             | 3.0988        | P13598             |
| ICAM2_HUMAN                                                                      |                  | R.VPTVEPLDSLTLFLFR.G           | 2             | 3.0263        | P13598             |
| <b><i>Keratin, type I cytoskeletal 10 - Homo sapiens (Human)</i></b>             |                  |                                |               |               |                    |
| K1C10_HUMAN                                                                      |                  | K.ADLEM*QIESLTEELAYLK.K        | 2             | 3.2634        | P13645             |
| K1C10_HUMAN                                                                      |                  | K.NQILNLTTDNANILLQIDNAR.L      | 2             | 4.7417        | P13645             |
| K1C10_HUMAN                                                                      |                  | K.ADLEMQIESLTEELAYLK.K         | 2             | 3.4991        | P13645             |
| K1C10_HUMAN                                                                      |                  | R.ALEESNYELEGK.I               | 2             | 3.3039        | P13645             |
| K1C10_HUMAN                                                                      |                  | K.ELTTEIDNIEQISSYK.S           | 2             | 4.2919        | P13645             |
| K1C10_HUMAN                                                                      |                  | K.NQILNLTTDNANILLQIDNAR.L      | 3             | 4.0626        | P13645             |
| K1C10_HUMAN                                                                      |                  | K.ELTTEIDNIEQISSYK.S           | 2             | 3.4183        | P13645             |
| K1C10_HUMAN                                                                      |                  | K.NQILNLTTDNANILLQIDNAR.L      | 2             | 4.2369        | P13645             |
| K1C10_HUMAN                                                                      |                  | K.ELTTEIDNIEQISSYK.S           | 2             | 4.0512        | P13645             |
| K1C10_HUMAN                                                                      |                  | R.NVSTGDVNVEMNAAPGVDLTQLLNMR.S | 2             | 3.2528        | P13645             |
| K1C10_HUMAN                                                                      |                  | K.NQILNLTTDNANILLQIDNAR.L      | 2             | 5.8869        | P13645             |
| K1C10_HUMAN                                                                      |                  | R.NVSTGDVNVEMNAAPGVDLTQLLNMR.S | 2             | 2.9629        | P13645             |
| K1C10_HUMAN                                                                      |                  | K.NQILNLTTDNANILLQIDNAR.L      | 2             | 3.6607        | P13645             |
| K1C10_HUMAN                                                                      |                  | K.YENEVALR.Q                   | 2             | 2.4535        | P13645             |
| K1C10_HUMAN                                                                      |                  | K.NQILNLTTDNANILLQIDNAR.L      | 3             | 5.5405        | P13645             |
| K1C10_HUMAN                                                                      |                  | R.VLDELTLTK.A                  | 2             | 2.6948        | P13645             |
| K1C10_HUMAN                                                                      |                  | R.VLDELTLTK.A                  | 2             | 2.4325        | P13645             |
| K1C10_HUMAN                                                                      |                  | K.ADLEMQIESLTEELAYLK.K         | 2             | 4.3589        | P13645             |
| K1C10_HUMAN                                                                      |                  | K.ADLEM*QIESLTEELAYLK.K        | 2             | 3.8233        | P13645             |
| K1C10_HUMAN                                                                      |                  | R.ALEESNYELEGK.I               | 2             | 2.3575        | P13645             |
| K1C10_HUMAN                                                                      |                  | K.NQILNLTTDNANILLQIDNAR.L      | 2             | 3.2759        | P13645             |
| K1C10_HUMAN                                                                      |                  | K.ADLEMQIESLTEELAYLK.K         | 2             | 2.9345        | P13645             |
| K1C10_HUMAN                                                                      |                  | R.ALEESNYELEGK.I               | 2             | 3.3805        | P13645             |
| K1C10_HUMAN                                                                      |                  | K.ADLEM*QIESLTEELAYLK.K        | 2             | 3.0669        | P13645             |
| K1C10_HUMAN                                                                      |                  | R.ALEESNYELEGK.I               | 2             | 3.4309        | P13645             |



| <i>Protein</i>                                                       | <i>Reference</i> | <i>Peptide sequence</i>          | <i>Charge</i> | <i>XCorr*</i> | <i>Accession**</i> |
|----------------------------------------------------------------------|------------------|----------------------------------|---------------|---------------|--------------------|
| <b><i>Keratin, type I cytoskeletal 9 - Homo sapiens (Human)</i></b>  |                  |                                  |               |               |                    |
| K1C9_HUMAN                                                           |                  | K.SDLEM*QYETLQEELMALK.K          | 2             | 2.9683        | P35527             |
| K1C9_HUMAN                                                           |                  | K.SDLEMQYETLQEELMALK.K           | 2             | 5.4804        | P35527             |
| K1C9_HUMAN                                                           |                  | K.VQALEEANNNDLENK.I              | 2             | 4.3705        | P35527             |
| K1C9_HUMAN                                                           |                  | R.GGSGGSYGGGGSGGGYGGGSGSR.G      | 2             | 4.5348        | P35527             |
| K1C9_HUMAN                                                           |                  | K.EIETYHNLLEGGQEDFESSGAGK.I      | 2             | 3.4702        | P35527             |
| K1C9_HUMAN                                                           |                  | K.EIETYHNLLEGGQEDFESSGAGK.I      | 2             | 2.7375        | P35527             |
| K1C9_HUMAN                                                           |                  | K.SDLEMQYETLQEELM*ALK.K          | 2             | 2.5705        | P35527             |
| K1C9_HUMAN                                                           |                  | K.SDLEMQYETLQEELMALK.K           | 2             | 3.2947        | P35527             |
| K1C9_HUMAN                                                           |                  | R.GGSGGSYGGGGSGGGYGGGSGSR.G      | 2             | 2.9533        | P35527             |
| K1C9_HUMAN                                                           |                  | K.DIENQYETQITQIEHEVSSSQEVQSSAK.E | 3             | 4.7307        | P35527             |
| K1C9_HUMAN                                                           |                  | K.VQALEEANNNDLENK.I              | 2             | 4.6489        | P35527             |
| K1C9_HUMAN                                                           |                  | K.SDLEM*QYETLQEELMALK.K          | 2             | 2.472         | P35527             |
| K1C9_HUMAN                                                           |                  | K.SDLEMQYETLQEELM*ALK.K          | 2             | 2.3079        | P35527             |
| K1C9_HUMAN                                                           |                  | K.SDLEMQYETLQEELM*ALK.K          | 2             | 3.5463        | P35527             |
| K1C9_HUMAN                                                           |                  | R.HGVQELEIELQSLSK.K              | 2             | 4.6278        | P35527             |
| K1C9_HUMAN                                                           |                  | K.VQALEEANNNDLENK.I              | 2             | 4.6055        | P35527             |
| K1C9_HUMAN                                                           |                  | K.VQALEEANNNDLENK.I              | 2             | 4.9163        | P35527             |
| K1C9_HUMAN                                                           |                  | K.SDLEMQYETLQEELMALK.K           | 3             | 4.4094        | P35527             |
| K1C9_HUMAN                                                           |                  | R.SGGGGGGGLGSGGSIR.S             | 2             | 2.6448        | P35527             |
| <b><i>Keratin, type II cytoskeletal I - Homo sapiens (Human)</i></b> |                  |                                  |               |               |                    |
| K2C1_HUMAN                                                           |                  | K.SLNNQFASFIDK.V                 | 2             | 3.0592        | P04264             |
| K2C1_HUMAN                                                           |                  | R.DYQELMNTK.L                    | 2             | 2.32          | P04264             |
| K2C1_HUMAN                                                           |                  | K.YEELQITAGR.H                   | 2             | 3.156         | P04264             |
| K2C1_HUMAN                                                           |                  | R.TNAENEFVTIK.K                  | 2             | 2.6725        | P04264             |
| K2C1_HUMAN                                                           |                  | K.QISNLQQSISDAEQR.G              | 2             | 3.4289        | P04264             |
| K2C1_HUMAN                                                           |                  | K.LNDLEDALQQAK.E                 | 2             | 3.4804        | P04264             |
| K2C1_HUMAN                                                           |                  | K.YEELQITAGR.H                   | 2             | 2.7122        | P04264             |
| K2C1_HUMAN                                                           |                  | R.TNAENEFVTIK.K                  | 2             | 2.4518        | P04264             |
| K2C1_HUMAN                                                           |                  | R.GGGGGYGGSSYGGSSYGGGGGGGR.      | 2             | 5.3098        | P04264             |
| K2C1_HUMAN                                                           |                  | K.LNDLEDALQQAK.E                 | 2             | 3.2086        | P04264             |
| K2C1_HUMAN                                                           |                  | K.YEELQITAGR.H                   | 2             | 3.0369        | P04264             |
| K2C1_HUMAN                                                           |                  | R.SLDLDSIAEVK.A                  | 2             | 3.072         | P04264             |
| K2C1_HUMAN                                                           |                  | R.SLDLDSIAEVK.A                  | 1             | 2.3109        | P04264             |
| K2C1_HUMAN                                                           |                  | K.NMQDMVEDYR.N                   | 2             | 2.3539        | P04264             |

| <i>Protein</i>                                                                 | <i>Reference</i> | <i>Peptide sequence</i>            | <i>Charge</i> | <i>XCorr*</i> | <i>Accession**</i> |
|--------------------------------------------------------------------------------|------------------|------------------------------------|---------------|---------------|--------------------|
| K2C1_HUMAN                                                                     |                  | R.SLDLDSIIAEVK.A                   | 1             | 2.2855        | P04264             |
| K2C1_HUMAN                                                                     |                  | R.SLDLDSIIAEVK.A                   | 2             | 2.5203        | P04264             |
| K2C1_HUMAN                                                                     |                  | K.LNDLEDALQQAK.E                   | 2             | 3.3169        | P04264             |
| K2C1_HUMAN                                                                     |                  | R.TNAENEFVTIK.K                    | 2             | 2.7825        | P04264             |
| K2C1_HUMAN                                                                     |                  | R.GGGGGGYGSGGSSYGSGGGSYGSGGGGGGGR. | 3             | 4.7775        | P04264             |
| K2C1_HUMAN                                                                     |                  | R.SLDLDSIIAEVK.A                   | 1             | 2.3322        | P04264             |
| K2C1_HUMAN                                                                     |                  | R.SLDLDSIIAEVK.A                   | 2             | 3.8614        | P04264             |
| K2C1_HUMAN                                                                     |                  | K.SLNNQFASFIDK.V                   | 2             | 3.2625        | P04264             |
| K2C1_HUMAN                                                                     |                  | K.LNDLEDALQQAK.E                   | 2             | 3.9508        | P04264             |
| K2C1_HUMAN                                                                     |                  | K.LNDLEDALQQAK.E                   | 2             | 2.821         | P04264             |
| K2C1_HUMAN                                                                     |                  | K.YEELQITAGR.H                     | 2             | 2.7268        | P04264             |
| K2C1_HUMAN                                                                     |                  | R.DYQELMNTK.L                      | 2             | 2.4075        | P04264             |
| K2C1_HUMAN                                                                     |                  | K.QISNLQQSISDAEQR.G                | 2             | 3.2678        | P04264             |
| K2C1_HUMAN                                                                     |                  | K.QISNLQQSISDAEQR.G                | 2             | 3.559         | P04264             |
| K2C1_HUMAN                                                                     |                  | R.SLDLDSIIAEVK.A                   | 1             | 2.1788        | P04264             |
| K2C1_HUMAN                                                                     |                  | R.SLDLDSIIAEVK.A                   | 2             | 3.9229        | P04264             |
| <b><i>Keratin, type II cytoskeletal 2 epidermal - Homo sapiens (Human)</i></b> |                  |                                    |               |               |                    |
| K22E_HUMAN                                                                     |                  | K.NVQDAIADAEQR.G                   | 2             | 3.4638        | P35908             |
| K22E_HUMAN                                                                     |                  | R.NLDLDSIIAEVK.A                   | 2             | 3.2551        | P35908             |
| K22E_HUMAN                                                                     |                  | K.LNDLEEALQQAK.E                   | 2             | 3.3077        | P35908             |
| K22E_HUMAN                                                                     |                  | R.FLEQQNQVLQTK.W                   | 2             | 4.5191        | P35908             |
| K22E_HUMAN                                                                     |                  | R.NLDLDSIIAEVK.A                   | 2             | 3.3207        | P35908             |
| K22E_HUMAN                                                                     |                  | R.FLEQQNQVLQTK.W                   | 2             | 4.0113        | P35908             |
| K22E_HUMAN                                                                     |                  | R.NLDLDSIIAEVK.A                   | 2             | 3.2757        | P35908             |
| K22E_HUMAN                                                                     |                  | R.FLEQQNQVLQTK.W                   | 2             | 3.8334        | P35908             |
| K22E_HUMAN                                                                     |                  | R.NLDLDSIIAEVK.A                   | 2             | 3.1737        | P35908             |
| K22E_HUMAN                                                                     |                  | K.NVQDAIADAEQR.G                   | 2             | 3.4187        | P35908             |
| K22E_HUMAN                                                                     |                  | R.FLEQQNQVLQTK.W                   | 2             | 4.375         | P35908             |
| K22E_HUMAN                                                                     |                  | R.FLEQQNQVLQTK.W                   | 2             | 4.0051        | P35908             |
| K22E_HUMAN                                                                     |                  | R.FLEQQNQVLQTK.W                   | 2             | 4.1679        | P35908             |
| <b><i>Keratin, type II cytoskeletal 6B - Homo sapiens (Human)</i></b>          |                  |                                    |               |               |                    |
| K2C6B_HUMAN                                                                    |                  | R.NMQDLVEDLKNK.Y                   | 2             | 2.5135        | P04259             |
| <b><i>KIAA1727 protein - Homo sapiens (Human)</i></b>                          |                  |                                    |               |               |                    |
| Q9C0D6_HUMA                                                                    |                  | R.TLTASENESM*RKVM*PITK.S           | 2             | 2.3402        | Q9C0D6             |
| <b><i>Kinesin-like protein KIF14 - Homo sapiens (Human)</i></b>                |                  |                                    |               |               |                    |

| <i>Protein</i>                                                                             | <i>Reference</i> | <i>Peptide sequence</i>      | <i>Charge</i> | <i>XCorr*</i> | <i>Accession**</i> |
|--------------------------------------------------------------------------------------------|------------------|------------------------------|---------------|---------------|--------------------|
|                                                                                            | KIF14_HUMAN      | K.LHLKSDM*SECENDDPLLRSAAGK.V | 2             | 2.6812        | Q15058             |
|                                                                                            | KIF14_HUMAN      | K.LHLKSDM*SECENDDPLLRSAAGK.V | 2             | 2.3698        | Q15058             |
| <b><i>Kinesin-like protein KIF9 - Homo sapiens (Human)</i></b>                             |                  |                              |               |               |                    |
|                                                                                            | KIF9_HUMAN       | R.M*VKNLEKELALLK.Q           | 2             | 2.3275        | Q9HAQ2             |
| <b><i>Lamin-B receptor - Homo sapiens (Human)</i></b>                                      |                  |                              |               |               |                    |
|                                                                                            | LBR_HUMAN        | R.NDLSPASSGNAVYDFFIGR.E      | 2             | 3.8079        | Q14739             |
| <b><i>Lamin-B1 - Homo sapiens (Human)</i></b>                                              |                  |                              |               |               |                    |
|                                                                                            | LMNB1_HUMAN      | R.IESLSSQLSNLQK.E            | 2             | 3.2662        | P20700             |
|                                                                                            | LMNB1_HUMAN      | K.SLEGDLEDLKDQIAQLEASLAAAK.K | 2             | 6.3848        | P20700             |
|                                                                                            | LMNB1_HUMAN      | R.DQMQQQLNDYEQLLDVK.L        | 2             | 3.2395        | P20700             |
|                                                                                            | LMNB1_HUMAN      | R.SLETENSALQLQVTER.E         | 2             | 3.1458        | P20700             |
|                                                                                            | LMNB1_HUMAN      | K.DAALATALGDKK.S             | 2             | 2.7247        | P20700             |
|                                                                                            | LMNB1_HUMAN      | K.SLEGDLEDLKDQIAQLEASLAAAK.K | 2             | 5.5658        | P20700             |
|                                                                                            | LMNB1_HUMAN      | R.IESLSSQLSNLQK.E            | 2             | 3.1075        | P20700             |
|                                                                                            | LMNB1_HUMAN      | K.SLEGDLEDLKDQIAQLEASLAAAK.K | 2             | 5.3369        | P20700             |
|                                                                                            | LMNB1_HUMAN      | R.DQMQQQLNDYEQLLDVK.L        | 2             | 3.5275        | P20700             |
|                                                                                            | LMNB1_HUMAN      | R.IESLSSQLSNLQK.E            | 2             | 3.3787        | P20700             |
|                                                                                            | LMNB1_HUMAN      | K.SLEGDLEDLKDQIAQLEASLAAAK.K | 2             | 5.818         | P20700             |
|                                                                                            | LMNB1_HUMAN      | K.NTSEQDQPMGGWEMIR.K         | 2             | 2.8265        | P20700             |
| <b><i>LENG4 protein - Homo sapiens (Human)</i></b>                                         |                  |                              |               |               |                    |
|                                                                                            | Q05DF0_HUMA      | R.AGGGPTLQC#PPPSSPEK.A       | 2             | 3.6199        | Q05DF0             |
|                                                                                            | Q05DF0_HUMA      | R.AGGGPTLQC#PPPSSPEK.A       | 2             | 3.3679        | Q05DF0             |
| <b><i>Leucine-rich repeat serine/threonine-protein kinase 2 - Homo sapiens (Human)</i></b> |                  |                              |               |               |                    |
|                                                                                            | LRRK2_HUMAN      | K.FPNEFDELEIQGK.L            | 2             | 3.1722        | Q5S007             |
| <b><i>Leukocyte common antigen precursor - Homo sapiens (Human)</i></b>                    |                  |                              |               |               |                    |
|                                                                                            | CD45_HUMAN       | K.DLQYSTDYTFK.A              | 2             | 2.7668        | P08575             |
|                                                                                            | CD45_HUMAN       | K.HELEMSK.E                  | 2             | 2.7027        | P08575             |
|                                                                                            | CD45_HUMAN       | R.SC#NLDEQQELVERDDEK.Q       | 2             | 2.5045        | P08575             |
|                                                                                            | CD45_HUMAN       | R.DPPSEPSPLEAEFQR.L          | 2             | 2.605         | P08575             |
|                                                                                            | CD45_HUMAN       | R.DPPSEPSPLEAEFQR.L          | 2             | 2.8741        | P08575             |
|                                                                                            | CD45_HUMAN       | R.SC#NLDEQQELVER.D           | 2             | 3.8958        | P08575             |
|                                                                                            | CD45_HUMAN       | R.SC#NLDEQQELVER.D           | 2             | 3.7506        | P08575             |
|                                                                                            | CD45_HUMAN       | R.DPPSEPSPLEAEFQR.L          | 2             | 2.388         | P08575             |
|                                                                                            | CD45_HUMAN       | R.SC#NLDEQQELVER.D           | 2             | 3.2179        | P08575             |

| <i>Protein</i>                                                                             | <i>Reference</i> | <i>Peptide sequence</i>             | <i>Charge</i> | <i>XCorr*</i> | <i>Accession**</i> |
|--------------------------------------------------------------------------------------------|------------------|-------------------------------------|---------------|---------------|--------------------|
| <b><i>Leukotriene B4 receptor 1 - Homo sapiens (Human)</i></b>                             |                  |                                     |               |               |                    |
|                                                                                            | LT4R1_HUMAN      | R.SGPAALEPGPSESLTASSPLK.L           | 2             | 2.4265        | Q15722             |
| <b><i>Lipase member K precursor - Homo sapiens (Human)</i></b>                             |                  |                                     |               |               |                    |
|                                                                                            | LIPK_HUMAN       | K.YDLPATINFIIIEKTGQK.R              | 2             | 2.6949        | Q5VXJ0             |
| <b><i>LOC387790 protein - Homo sapiens (Human)</i></b>                                     |                  |                                     |               |               |                    |
|                                                                                            | Q3ZCU0_HUMA      | R.ARSADVQGQEKM*DVTAQEAR.T           | 2             | 2.4301        | Q3ZCU0             |
| <b><i>LOC730092 protein - Homo sapiens (Human)</i></b>                                     |                  |                                     |               |               |                    |
|                                                                                            | Q7L4D9_HUMAN     | R.LLTPVIPALWEAEVGGSPSEVRSSR.P       | 2             | 2.5307        | Q7L4D9             |
| <b><i>Long-chain fatty acid transport protein 3 - Homo sapiens (Human)</i></b>             |                  |                                     |               |               |                    |
|                                                                                            | S27A3_HUMAN      | R.AAPGAGDAAAGSGAEFAGGDGAAR.G        | 2             | 4.0686        | Q5K4L6             |
| <b><i>Lysozyme C precursor - Homo sapiens (Human)</i></b>                                  |                  |                                     |               |               |                    |
|                                                                                            | LYSC_HUMAN       | R.STDYGIFQINSR.Y                    | 2             | 3.4726        | P61626             |
|                                                                                            | LYSC_HUMAN       | R.STDYGIFQINSR.Y                    | 2             | 3.5298        | P61626             |
|                                                                                            | LYSC_HUMAN       | R.STDYGIFQINSR.Y                    | 2             | 3.493         | P61626             |
|                                                                                            | LYSC_HUMAN       | R.STDYGIFQINSR.Y                    | 2             | 3.1157        | P61626             |
|                                                                                            | LYSC_HUMAN       | R.STDYGIFQINSR.Y                    | 2             | 3.5822        | P61626             |
| <b><i>MBC3205 - Homo sapiens (Human)</i></b>                                               |                  |                                     |               |               |                    |
|                                                                                            | Q6UW68_HUMA      | R.GLGGEVPGSHQGPDPYR.Q               | 2             | 3.2399        | Q6UW68             |
| <b><i>Membrane-associated progesterone receptor component 1 - Homo sapiens (Human)</i></b> |                  |                                     |               |               |                    |
|                                                                                            | PGRC1_HUMAN      | K.EALKDEYDDLSDLTAAQQETLSDWESQFTFK.Y | 3             | 3.8886        | O00264             |
| <b><i>Membrane-associated progesterone receptor component 2 - Homo sapiens (Human)</i></b> |                  |                                     |               |               |                    |
|                                                                                            | PGRC2_HUMAN      | R.GLGAGAGAGEESPATSLPR.M             | 2             | 2.7734        | O15173             |
| <b><i>Methyltransferase-like protein 7A precursor - Homo sapiens (Human)</i></b>           |                  |                                     |               |               |                    |
|                                                                                            | MET7A_HUMAN      | R.ELFSNLQEFAGPSGK.L                 | 2             | 4.5344        | Q9H8H3             |
|                                                                                            | MET7A_HUMAN      | R.ELFSNLQEFAGPSGK.L                 | 2             | 3.4861        | Q9H8H3             |
|                                                                                            | MET7A_HUMAN      | R.ELFSNLQEFAGPSGK.L                 | 2             | 3.895         | Q9H8H3             |
|                                                                                            | MET7A_HUMAN      | R.ELFSNLQEFAGPSGK.L                 | 2             | 2.5348        | Q9H8H3             |
|                                                                                            | MET7A_HUMAN      | R.ELFSNLQEFAGPSGK.L                 | 2             | 3.3919        | Q9H8H3             |
| <b><i>Microspherule protein 1 - Homo sapiens (Human)</i></b>                               |                  |                                     |               |               |                    |
|                                                                                            | MCRS1_HUMAN      | R.HPDAFYLARTAK.A                    | 2             | 2.5237        | Q96EZ8             |
| <b><i>Mitochondrial carrier homolog 2 - Homo sapiens (Human)</i></b>                       |                  |                                     |               |               |                    |
|                                                                                            | MTCH2_HUMAN      | K.VLQHYQESDKGEELGPGNVQK.E           | 3             | 5.428         | Q9Y6C9             |
|                                                                                            | MTCH2_HUMAN      | R.EEGILGFFAGLVPR.L                  | 2             | 2.6783        | Q9Y6C9             |

| <i>Protein</i>                                                                       | <i>Reference</i> | <i>Peptide sequence</i>       | <i>Charge</i> | <i>XCorr*</i> | <i>Accession**</i> |
|--------------------------------------------------------------------------------------|------------------|-------------------------------|---------------|---------------|--------------------|
|                                                                                      | MTCH2_HUMAN      | R.EEGILGFFAGLVPR.L            | 2             | 3.2509        | Q9Y6C9             |
|                                                                                      | MTCH2_HUMAN      | R.EEGILGFFAGLVPR.L            | 2             | 3.3758        | Q9Y6C9             |
|                                                                                      | MTCH2_HUMAN      | K.VLQHYQESDKGEELGPGNVQK.E     | 3             | 5.0294        | Q9Y6C9             |
| <b><i>Mitochondrial inner membrane protein - Homo sapiens (Human)</i></b>            |                  |                               |               |               |                    |
|                                                                                      | IMMT_HUMAN       | R.GIEQAVQSHAVAEER.K           | 2             | 2.8406        | Q16891             |
|                                                                                      | IMMT_HUMAN       | K.TSSAETPTIPLGSAVEAIK.A       | 2             | 2.4469        | Q16891             |
|                                                                                      | IMMT_HUMAN       | R.GIEQAVQSHAVAEER.K           | 3             | 3.9266        | Q16891             |
|                                                                                      | IMMT_HUMAN       | R.GIEQAVQSHAVAEER.K           | 2             | 3.5931        | Q16891             |
|                                                                                      | IMMT_HUMAN       | K.TSSAETPTIPLGSAVEAIK.A       | 2             | 3.3464        | Q16891             |
| <b><i>Mitochondrial Rho GTPase 1 - Homo sapiens (Human)</i></b>                      |                  |                               |               |               |                    |
|                                                                                      | MIRO1_HUMAN      | R.FGYDDDLDTPEYLFPLLK.I        | 2             | 3.1201        | Q8IXI2             |
|                                                                                      | MIRO1_HUMAN      | R.FGYDDDLDTPEYLFPLLK.I        | 2             | 3.5566        | Q8IXI2             |
|                                                                                      | MIRO1_HUMAN      | R.FGYDDDLDTPEYLFPLLK.I        | 2             | 2.3064        | Q8IXI2             |
|                                                                                      | MIRO1_HUMAN      | R.FGYDDDLDTPEYLFPLLK.I        | 2             | 2.8852        | Q8IXI2             |
| <b><i>MMS19-like protein - Homo sapiens (Human)</i></b>                              |                  |                               |               |               |                    |
|                                                                                      | MMS19_HUMAN      | R.ADAEDLLDSFLSNILQDC#R.H      | 2             | 3.7298        | Q96T76             |
| <b><i>Moesin - Homo sapiens (Human)</i></b>                                          |                  |                               |               |               |                    |
|                                                                                      | MOES_HUMAN       | K.FYPEDVSEELIQDITQR.L         | 2             | 2.4121        | P26038             |
|                                                                                      | MOES_HUMAN       | K.FYPEDVSEELIQDITQR.L         | 2             | 2.4852        | P26038             |
| <b><i>Monocyte differentiation antigen CD14 precursor - Homo sapiens (Human)</i></b> |                  |                               |               |               |                    |
|                                                                                      | CD14_HUMAN       | K.ITGTMPPLEATGLALSSLR.L       | 2             | 2.4571        | P08571             |
|                                                                                      | CD14_HUMAN       | K.ITGTMPPLEATGLALSSLR.L       | 2             | 2.5064        | P08571             |
|                                                                                      | CD14_HUMAN       | K.ITGTMPPLEATGLALSSLR.L       | 2             | 2.3273        | P08571             |
|                                                                                      | CD14_HUMAN       | K.ITGTMPPLEATGLALSSLR.L       | 2             | 2.4496        | P08571             |
| <b><i>Myeloid cell nuclear differentiation antigen - Homo sapiens (Human)</i></b>    |                  |                               |               |               |                    |
|                                                                                      | MNDA_HUMAN       | K.NTIYEIQDNTGSM*DVVGSGK.W     | 2             | 3.5267        | P41218             |
|                                                                                      | MNDA_HUMAN       | K.NTIYEIQDNTGSM DVVGSGK.W     | 2             | 6.8274        | P41218             |
|                                                                                      | MNDA_HUMAN       | K.NTIYEIQDNTGSM DVVGSGK.W     | 2             | 7.0407        | P41218             |
|                                                                                      | MNDA_HUMAN       | K.EASSVDFNQNFV PNR.I          | 2             | 2.532         | P41218             |
|                                                                                      | MNDA_HUMAN       | K.EASSVDFNQNFV PNR.I          | 2             | 2.9611        | P41218             |
|                                                                                      | MNDA_HUMAN       | K.NTIYEIQDNTGSM DVVGSGK.W     | 2             | 6.5699        | P41218             |
|                                                                                      | MNDA_HUMAN       | K.NTIYEIQDNTGSM*DVVGSGK.W     | 2             | 4.3805        | P41218             |
| <b><i>Myeloperoxidase precursor - Homo sapiens (Human)</i></b>                       |                  |                               |               |               |                    |
|                                                                                      | PERM_HUMAN       | R.NQINALTSFVDASMVY GSEEPLAR.N | 2             | 4.1234        | P05164             |

| <i>Protein</i>                                 | <i>Reference</i> | <i>Peptide sequence</i>        | <i>Charge</i> | <i>XCorr*</i> | <i>Accession**</i> |
|------------------------------------------------|------------------|--------------------------------|---------------|---------------|--------------------|
|                                                | PERM_HUMAN       | R.FPTDQLTPDQER.S               | 2             | 4.0008        | P05164             |
|                                                | PERM_HUMAN       | R.FPTDQLTPDQER.S               | 2             | 3.3846        | P05164             |
|                                                | PERM_HUMAN       | R.NQINALTSFVDASMYGSEEPLAR.N    | 2             | 3.4304        | P05164             |
| <b><i>Myosin-10 - Homo sapiens (Human)</i></b> |                  |                                |               |               |                    |
|                                                | MYH10_HUMAN      | R.EDQSILC#TGESGAGK.T           | 2             | 3.3817        | P35580             |
|                                                | MYH10_HUMAN      | R.TQLEEELEDELQATEDAK.L         | 2             | 2.9523        | P35580             |
|                                                | MYH10_HUMAN      | R.EDQSILC#TGESGAGK.T           | 2             | 3.3029        | P35580             |
|                                                | MYH10_HUMAN      | R.TQLEEELEDELQATEDAK.L         | 2             | 3.8174        | P35580             |
|                                                | MYH10_HUMAN      | R.EDQSILC#TGESGAGK.T           | 2             | 2.85          | P35580             |
|                                                | MYH10_HUMAN      | R.EDQSILC#TGESGAGK.T           | 2             | 3.2919        | P35580             |
|                                                | MYH10_HUMAN      | R.TQLEEELEDELQATEDAK.L         | 2             | 3.2573        | P35580             |
|                                                | MYH10_HUMAN      | R.TQLEEELEDELQATEDAK.L         | 2             | 6.5382        | P35580             |
|                                                | MYH10_HUMAN      | R.EDQSILC#TGESGAGK.T           | 2             | 3.2823        | P35580             |
| <b><i>Myosin-11 - Homo sapiens (Human)</i></b> |                  |                                |               |               |                    |
|                                                | MYH11_HUMAN      | R.NTDQASMPDNTAAQK.V            | 2             | 3.9175        | P35749             |
|                                                | MYH11_HUMAN      | R.NTDQASMPDNTAAQK.V            | 2             | 3.5718        | P35749             |
|                                                | MYH11_HUMAN      | R.NTDQASMPDNTAAQK.V            | 2             | 3.2302        | P35749             |
|                                                | MYH11_HUMAN      | R.NTDQASMPDNTAAQK.V            | 2             | 3.108         | P35749             |
| <b><i>Myosin-9 - Homo sapiens (Human)</i></b>  |                  |                                |               |               |                    |
|                                                | MYH9_HUMAN       | R.QLEEAEEEEAQR.A               | 2             | 2.5582        | P35579             |
|                                                | MYH9_HUMAN       | K.VEAQLQELQVK.F                | 2             | 2.9416        | P35579             |
|                                                | MYH9_HUMAN       | K.DVLLQVDDERR.N                | 2             | 2.7101        | P35579             |
|                                                | MYH9_HUMAN       | K.HEAMITDLEER.L                | 2             | 3.7198        | P35579             |
|                                                | MYH9_HUMAN       | K.SM*EAEMIQLQEELAAAER.A        | 2             | 3.9467        | P35579             |
|                                                | MYH9_HUMAN       | R.DELADEIANSSGK.G              | 2             | 3.0464        | P35579             |
|                                                | MYH9_HUMAN       | K.DLEAHIDSANK.N                | 2             | 3.6401        | P35579             |
|                                                | MYH9_HUMAN       | K.DMFQETMEAMR.I                | 2             | 2.6605        | P35579             |
|                                                | MYH9_HUMAN       | K.SMEAEMIQLQEELAAAER.A         | 2             | 2.4081        | P35579             |
|                                                | MYH9_HUMAN       | K.DFSALESQQLQDTQELLQEENR.Q     | 2             | 5.6836        | P35579             |
|                                                | MYH9_HUMAN       | K.DFSALESQQLQDTQELLQEENR.Q     | 2             | 3.9658        | P35579             |
|                                                | MYH9_HUMAN       | R.IIGLDQVAGMSETALPGAFK.T       | 2             | 2.7328        | P35579             |
|                                                | MYH9_HUMAN       | R.ELESQISELQEDLESER.A          | 2             | 2.9971        | P35579             |
|                                                | MYH9_HUMAN       | R.IAQLLEEELEEEQGNTELELINDR.L   | 2             | 4.7548        | P35579             |
|                                                | MYH9_HUMAN       | R.IAEFTTNLTTEEEK.S             | 2             | 2.5372        | P35579             |
|                                                | MYH9_HUMAN       | R.DLGEELEALKTELEDTLSTAAQQELR.S | 2             | 4.4676        | P35579             |

| <i>Protein</i> | <i>Reference</i> | <i>Peptide sequence</i>        | <i>Charge</i> | <i>XCorr*</i> | <i>Accession**</i> |
|----------------|------------------|--------------------------------|---------------|---------------|--------------------|
| MYH9_HUMAN     |                  | R.KLEGDSTDLSDQIAELQAQIAELK.M   | 2             | 5.775         | P35579             |
| MYH9_HUMAN     |                  | K.DFSALESQIQDTQELLQEENR.Q      | 2             | 2.3962        | P35579             |
| MYH9_HUMAN     |                  | R.LQQELDLLVLDLHQR.Q            | 2             | 2.4759        | P35579             |
| MYH9_HUMAN     |                  | K.M*QQNIQELEEQLLEEEESAR.Q      | 2             | 3.419         | P35579             |
| MYH9_HUMAN     |                  | R.IAEFTTNLTETEEEEK.S           | 2             | 3.6025        | P35579             |
| MYH9_HUMAN     |                  | K.HSQAVEELAEQLEQTK.R           | 2             | 3.9934        | P35579             |
| MYH9_HUMAN     |                  | K.MQQNIQELEEQLLEEEESAR.Q       | 2             | 5.2729        | P35579             |
| MYH9_HUMAN     |                  | R.VISGVLQLGNIVFK.K             | 2             | 3.4905        | P35579             |
| MYH9_HUMAN     |                  | K.LEEEQIILEDQNC#K.L            | 2             | 3.6149        | P35579             |
| MYH9_HUMAN     |                  | K.IAQLEEQLDNETK.E              | 2             | 3.6852        | P35579             |
| MYH9_HUMAN     |                  | K.KLEEEQIILEDQNC#K.L           | 2             | 4.6102        | P35579             |
| MYH9_HUMAN     |                  | R.ELEDATETADAMNR.E             | 2             | 4.5679        | P35579             |
| MYH9_HUMAN     |                  | R.ELEDATETADAMNR.E             | 2             | 3.8141        | P35579             |
| MYH9_HUMAN     |                  | R.ELEDATETADAM*NR.E            | 2             | 3.422         | P35579             |
| MYH9_HUMAN     |                  | K.TELEDTLSTAAQQELR.S           | 2             | 3.5022        | P35579             |
| MYH9_HUMAN     |                  | R.QLEEAEEEAQR.A                | 2             | 2.707         | P35579             |
| MYH9_HUMAN     |                  | R.ELEDATETADAMNR.E             | 2             | 4.0365        | P35579             |
| MYH9_HUMAN     |                  | K.HEAMITDLEER.L                | 2             | 3.2398        | P35579             |
| MYH9_HUMAN     |                  | K.KLEEEQIILEDQNC#K.L           | 3             | 3.7526        | P35579             |
| MYH9_HUMAN     |                  | K.KLEEEQIILEDQNC#K.L           | 2             | 4.4599        | P35579             |
| MYH9_HUMAN     |                  | K.IAQLEEQLDNETK.E              | 2             | 3.0718        | P35579             |
| MYH9_HUMAN     |                  | R.IAEFTTNLTETEEEEK.S           | 2             | 3.1756        | P35579             |
| MYH9_HUMAN     |                  | K.HSQAVEELAEQLEQTKR.V          | 3             | 5.0598        | P35579             |
| MYH9_HUMAN     |                  | K.MQQNIQELEEQLLEEEESAR.Q       | 2             | 5.3118        | P35579             |
| MYH9_HUMAN     |                  | R.IIGLDQVAGMSETALPGAFK.T       | 2             | 2.9863        | P35579             |
| MYH9_HUMAN     |                  | K.DFSALESQIQDTQELLQEENR.Q      | 2             | 4.2362        | P35579             |
| MYH9_HUMAN     |                  | K.SMEAEMIQLQEELAAAER.A         | 2             | 3.8788        | P35579             |
| MYH9_HUMAN     |                  | K.SMEAEMIQLQEELAAAER.A         | 3             | 4.9751        | P35579             |
| MYH9_HUMAN     |                  | K.HSQAVEELAEQLEQTK.R           | 2             | 2.8903        | P35579             |
| MYH9_HUMAN     |                  | R.DLGEELEALKTELEDTLSTAAQQELR.S | 2             | 5.1704        | P35579             |
| MYH9_HUMAN     |                  | K.DFSALESQIQDTQELLQEENR.Q      | 2             | 4.4825        | P35579             |
| MYH9_HUMAN     |                  | K.HSQAVEELAEQLEQTK.R           | 3             | 3.8165        | P35579             |
| MYH9_HUMAN     |                  | K.HSQAVEELAEQLEQTKR.V          | 3             | 4.5333        | P35579             |
| MYH9_HUMAN     |                  | K.LEEEQIILEDQNC#K.L            | 2             | 2.9534        | P35579             |
| MYH9_HUMAN     |                  | K.KLEEEQIILEDQNC#K.L           | 2             | 4.8643        | P35579             |
| MYH9_HUMAN     |                  | K.LEGDSTDLSDQIAELQAQIAELK.M    | 2             | 5.3247        | P35579             |

| <i>Protein</i>                                                                                         | <i>Reference</i> | <i>Peptide sequence</i>   | <i>Charge</i> | <i>XCorr*</i> | <i>Accession**</i> |
|--------------------------------------------------------------------------------------------------------|------------------|---------------------------|---------------|---------------|--------------------|
| MYH9_HUMAN                                                                                             |                  | R.ELEDATETADAMNR.E        | 2             | 3.3633        | P35579             |
| MYH9_HUMAN                                                                                             |                  | K.HSQAVEELAEQLEQTK.R      | 2             | 2.6898        | P35579             |
| MYH9_HUMAN                                                                                             |                  | K.MQQNIQELEEQLLEEEESAR.Q  | 2             | 5.3785        | P35579             |
| MYH9_HUMAN                                                                                             |                  | K.HSQAVEELAEQLEQTKR.V     | 3             | 5.0031        | P35579             |
| MYH9_HUMAN                                                                                             |                  | K.LEEEQIILEDQNC#K.L       | 2             | 3.5254        | P35579             |
| MYH9_HUMAN                                                                                             |                  | K.VEAQLQELQVK.F           | 2             | 2.7609        | P35579             |
| MYH9_HUMAN                                                                                             |                  | K.HEAMITDLEER.L           | 2             | 3.6582        | P35579             |
| MYH9_HUMAN                                                                                             |                  | R.ELEDATETADAMNR.E        | 2             | 3.5708        | P35579             |
| MYH9_HUMAN                                                                                             |                  | K.HEAMITDLEER.L           | 2             | 3.5029        | P35579             |
| <b><i>Myosin-Ie - Homo sapiens (Human)</i></b>                                                         |                  |                           |               |               |                    |
| MYO1E_HUMAN                                                                                            |                  | K.DIILQSNPLLEAFGNAK.T     | 2             | 3.2805        | Q12965             |
| MYO1E_HUMAN                                                                                            |                  | K.DIILQSNPLLEAFGNAK.T     | 2             | 3.7902        | Q12965             |
| <b><i>Myosin-If - Homo sapiens (Human)</i></b>                                                         |                  |                           |               |               |                    |
| MYO1F_HUMAN                                                                                            |                  | K.NPESLFLLEEVR.E          | 2             | 2.778         | O00160             |
| MYO1F_HUMAN                                                                                            |                  | R.QDDFFILQEDAADSFLSVFK.T  | 2             | 3.9469        | O00160             |
| MYO1F_HUMAN                                                                                            |                  | R.DVLFSDLIELMQTSEQAFLR.M  | 3             | 4.1345        | O00160             |
| MYO1F_HUMAN                                                                                            |                  | K.NPESLFLLEEVR.E          | 2             | 3.9311        | O00160             |
| MYO1F_HUMAN                                                                                            |                  | R.DVLFSDLIELMQTSEQAFLR.M  | 3             | 4.367         | O00160             |
| <b><i>Myosin-IG - Homo sapiens (Human)</i></b>                                                         |                  |                           |               |               |                    |
| Q6ZNK5_HUMA                                                                                            |                  | R.DYLSSATDNPTASSLFAQR.L   | 2             | 3.9285        | Q6ZNK5             |
| Q6ZNK5_HUMA                                                                                            |                  | R.DYLSSATDNPTASSLFAQR.L   | 2             | 4.1076        | Q6ZNK5             |
| <b><i>NADH dehydrogenase [ubiquinone] 1 alpha subcomplex subunit 9, mitochondrial precursor -</i></b>  |                  |                           |               |               |                    |
| NDUA9_HUMAN                                                                                            |                  | K.LPHLPGLLEDLGIQATPLELK.A | 3             | 4.4917        | Q16795             |
| <b><i>NADH dehydrogenase [ubiquinone] 1 beta subcomplex subunit 10 - Homo sapiens (Human)</i></b>      |                  |                           |               |               |                    |
| NDUBA_HUMAN                                                                                            |                  | R.DYKVDQEIIINIMQDR.L      | 2             | 3.7328        | O96000             |
| NDUBA_HUMAN                                                                                            |                  | K.VDQEIIINIMQDR.L         | 2             | 2.5659        | O96000             |
| <b><i>NADH dehydrogenase [ubiquinone] 1 beta subcomplex subunit 4 - Homo sapiens (Human)</i></b>       |                  |                           |               |               |                    |
| NDUB4_HUMAN                                                                                            |                  | R.TLPETLDPAEYNISPETR.R    | 2             | 3.5661        | O95168             |
| NDUB4_HUMAN                                                                                            |                  | R.TLPETLDPAEYNISPETR.R    | 2             | 2.6037        | O95168             |
| <b><i>NADH dehydrogenase [ubiquinone] 1 beta subcomplex subunit 8, mitochondrial precursor - H</i></b> |                  |                           |               |               |                    |
| NDUB8_HUMAN                                                                                            |                  | R.VEDYEPYPDDGMGYGDYPK.L   | 2             | 2.988         | O95169             |
| NDUB8_HUMAN                                                                                            |                  | R.VEDYEPYPDDGM*GYGDYPK.L  | 2             | 2.3512        | O95169             |
| <b><i>NADH-cytochrome b5 reductase 3 - Homo sapiens (Human)</i></b>                                    |                  |                           |               |               |                    |
| NB5R3_HUMAN                                                                                            |                  | R.APEAWDYGGQGFVNEEMIR.D   | 2             | 4.5641        | P00387             |



| <i>Protein</i>                                                                        | <i>Reference</i> | <i>Peptide sequence</i>     | <i>Charge</i> | <i>XCorr*</i> | <i>Accession**</i> |
|---------------------------------------------------------------------------------------|------------------|-----------------------------|---------------|---------------|--------------------|
|                                                                                       | NB5R3_HUMAN      | R.APEAWDYQGQGFVNEEM*IR.D    | 2             | 3.6829        | P00387             |
|                                                                                       | NB5R3_HUMAN      | R.APEAWDYQGQGFVNEEMIR.D     | 2             | 3.87          | P00387             |
|                                                                                       | NB5R3_HUMAN      | R.APEAWDYQGQGFVNEEM*IR.D    | 2             | 3.8219        | P00387             |
|                                                                                       | NB5R3_HUMAN      | R.APEAWDYQGQGFVNEEM*IR.D    | 2             | 3.5935        | P00387             |
|                                                                                       | NB5R3_HUMAN      | K.DILLRPELEELR.N            | 2             | 2.5282        | P00387             |
|                                                                                       | NB5R3_HUMAN      | K.DILLRPELEELR.N            | 2             | 2.3275        | P00387             |
|                                                                                       | NB5R3_HUMAN      | R.GPSGLLVYQ GK.G            | 2             | 2.3944        | P00387             |
|                                                                                       | NB5R3_HUMAN      | R.GPSGLLVYQ GK.G            | 2             | 3.1994        | P00387             |
|                                                                                       | NB5R3_HUMAN      | K.DILLRPELEELR.N            | 2             | 2.5662        | P00387             |
|                                                                                       | NB5R3_HUMAN      | R.APEAWDYQGQGFVNEEMIR.D     | 2             | 4.6346        | P00387             |
|                                                                                       | NB5R3_HUMAN      | R.APEAWDYQGQGFVNEEMIR.D     | 2             | 4.0611        | P00387             |
|                                                                                       | NB5R3_HUMAN      | K.DILLRPELEELR.N            | 2             | 2.8941        | P00387             |
|                                                                                       | NB5R3_HUMAN      | K.DILLRPELEELR.N            | 2             | 2.3631        | P00387             |
| <b><i>Nck-associated protein 1-like - Homo sapiens (Human)</i></b>                    |                  |                             |               |               |                    |
|                                                                                       | NCKPL_HUMAN      | K.TPEDYADSSIAELLFLEGLR.S    | 2             | 2.83          | P55160             |
| <b><i>Neurobeachin-like protein 2 - Homo sapiens (Human)</i></b>                      |                  |                             |               |               |                    |
|                                                                                       | Q6ZNJ1_HUMAN     | R.PGLDSEPGGAEAGK.A          | 2             | 2.3633        | Q6ZNJ1             |
| <b><i>Neutrophil cytosol factor 2 - Homo sapiens (Human)</i></b>                      |                  |                             |               |               |                    |
|                                                                                       | NCF2_HUMAN       | R.IHPQQPQEESSPQSDIPAPPSSK.A | 3             | 3.7625        | P19878             |
|                                                                                       | NCF2_HUMAN       | R.IHPQQPQEESSPQSDIPAPPSSK.A | 3             | 3.9545        | P19878             |
| <b><i>Niban protein - Homo sapiens (Human)</i></b>                                    |                  |                             |               |               |                    |
|                                                                                       | NIBA_HUMAN       | K.NDYAVESYENK.E             | 2             | 2.5658        | Q9BZQ8             |
| <b><i>Nuclear pore membrane glycoprotein 210 precursor - Homo sapiens (Human)</i></b> |                  |                             |               |               |                    |
|                                                                                       | PO210_HUMAN      | R.ELSDEIQVQVFEK.L           | 2             | 2.6955        | Q8TEM1             |
|                                                                                       | PO210_HUMAN      | R.GVAIGQTSLTASVTNK.A        | 2             | 4.1943        | Q8TEM1             |
|                                                                                       | PO210_HUMAN      | R.VFGAPEVLENLEVK.S          | 2             | 3.4208        | Q8TEM1             |
|                                                                                       | PO210_HUMAN      | R.ELSDEIQVQVFEK.L           | 2             | 2.3053        | Q8TEM1             |
|                                                                                       | PO210_HUMAN      | R.GVAIGQTSLTASVTNK.A        | 2             | 4.0659        | Q8TEM1             |
|                                                                                       | PO210_HUMAN      | R.VFGAPEVLENLEVK.S          | 2             | 3.2971        | Q8TEM1             |
|                                                                                       | PO210_HUMAN      | R.LPSQYNFAMNVLGR.V          | 2             | 2.8468        | Q8TEM1             |
|                                                                                       | PO210_HUMAN      | R.GVAIGQTSLTASVTNK.A        | 2             | 4.2601        | Q8TEM1             |
|                                                                                       | PO210_HUMAN      | R.ELYLEDSPLELK.I            | 2             | 2.9224        | Q8TEM1             |
| <b><i>PDCD6IP protein - Homo sapiens (Human)</i></b>                                  |                  |                             |               |               |                    |
|                                                                                       | Q6NUS1_HUMA      | R.LLDEEEATDNDLR.A           | 2             | 2.5938        | Q6NUS1             |

| <i>Protein</i>                                                                             | <i>Reference</i> | <i>Peptide sequence</i>       | <i>Charge</i> | <i>XCorr*</i> | <i>Accession**</i> |
|--------------------------------------------------------------------------------------------|------------------|-------------------------------|---------------|---------------|--------------------|
| <b><i>Peptidyl-prolyl cis-trans isomerase-like 4 - Homo sapiens (Human)</i></b>            |                  |                               |               |               |                    |
|                                                                                            | PPIL4_HUMAN      | R.IHVDFSQSVAKVK.W             | 2             | 2.433         | Q8WUA2             |
| <b><i>Peripherin - Homo sapiens (Human)</i></b>                                            |                  |                               |               |               |                    |
|                                                                                            | PERI_HUMAN       | K.NLQEAEWYK.S                 | 2             | 2.8437        | P41219             |
|                                                                                            | PERI_HUMAN       | K.NLQEAEWYK.S                 | 2             | 2.4827        | P41219             |
| <b><i>Peroxiredoxin-6 - Homo sapiens (Human)</i></b>                                       |                  |                               |               |               |                    |
|                                                                                            | PRDX6_HUMAN      | R.ELAILLGMLDPAEKDEK.G         | 2             | 2.3487        | P30041             |
|                                                                                            | PRDX6_HUMAN      | K.LPFPIDDR.N                  | 2             | 2.5496        | P30041             |
| <b><i>Phosphate carrier protein, mitochondrial precursor - Homo sapiens (Human)</i></b>    |                  |                               |               |               |                    |
|                                                                                            | MPCP_HUMAN       | R.LPRPPPEMPESLK.K             | 3             | 4.1846        | Q00325             |
|                                                                                            | MPCP_HUMAN       | R.LPRPPPEMPESLKK.K            | 3             | 4.0734        | Q00325             |
| <b><i>Plasma membrane calcium-transporting ATPase 4 - Homo sapiens (Human)</i></b>         |                  |                               |               |               |                    |
|                                                                                            | AT2B4_HUMAN      | R.TPLLDEEEENPDK.A             | 2             | 2.7298        | P23634             |
| <b><i>Plastin-2 - Homo sapiens (Human)</i></b>                                             |                  |                               |               |               |                    |
|                                                                                            | PLSL_HUMAN       | K.ISTSLPVLDLIDAIQPGSINYDLLK.T | 2             | 3.0177        | P13796             |
|                                                                                            | PLSL_HUMAN       | R.EITENLMATGDLQDGR.I          | 2             | 2.6133        | P13796             |
|                                                                                            | PLSL_HUMAN       | K.ISTSLPVLDLIDAIQPGSINYDLLK.T | 2             | 3.9544        | P13796             |
|                                                                                            | PLSL_HUMAN       | K.VNDDIIVNWVNETLR.E           | 2             | 3.0046        | P13796             |
|                                                                                            | PLSL_HUMAN       | R.EITENLMATGDLQDGR.I          | 2             | 3.6613        | P13796             |
| <b><i>Platelet endothelial cell adhesion molecule precursor - Homo sapiens (Human)</i></b> |                  |                               |               |               |                    |
|                                                                                            | PECA1_HUMAN      | K.SELVTVTESFSTPK.F            | 2             | 2.8118        | P16284             |
|                                                                                            | PECA1_HUMAN      | K.SELVTVTESFSTPK.F            | 2             | 2.3593        | P16284             |
|                                                                                            | PECA1_HUMAN      | R.DQNFVILEFPVEEQDR.V          | 2             | 2.9777        | P16284             |
|                                                                                            | PECA1_HUMAN      | R.DQNFVILEFPVEEQDR.V          | 2             | 3.2765        | P16284             |
|                                                                                            | PECA1_HUMAN      | K.EDTIVSQTQDFTK.I             | 2             | 3.7885        | P16284             |
|                                                                                            | PECA1_HUMAN      | K.EDTIVSQTQDFTK.I             | 2             | 2.8659        | P16284             |
|                                                                                            | PECA1_HUMAN      | K.EDTIVSQTQDFTK.I             | 2             | 3.7456        | P16284             |
| <b><i>Platelet glycoprotein 4 - Homo sapiens (Human)</i></b>                               |                  |                               |               |               |                    |
|                                                                                            | CD36_HUMAN       | K.QVVLEEGTIAFK.N              | 2             | 2.4969        | P16671             |
| <b><i>Plectin-1 - Homo sapiens (Human)</i></b>                                             |                  |                               |               |               |                    |
|                                                                                            | PLEC1_HUMAN      | R.LLDPEDVDVPQPDEK.S           | 2             | 2.8764        | Q15149             |
|                                                                                            | PLEC1_HUMAN      | R.FPSSFEEIEILWSQFLK.F         | 2             | 3.5387        | Q15149             |
|                                                                                            | PLEC1_HUMAN      | R.RPELEDSTLR.Y                | 2             | 2.6883        | Q15149             |
|                                                                                            | PLEC1_HUMAN      | R.SLESLHSFVAAATK.E            | 2             | 2.307         | Q15149             |

| <i>Protein</i>                                                                       | <i>Reference</i> | <i>Peptide sequence</i>     | <i>Charge</i> | <i>XCorr*</i> | <i>Accession**</i> |
|--------------------------------------------------------------------------------------|------------------|-----------------------------|---------------|---------------|--------------------|
| <b><i>Plexin-B2 precursor - Homo sapiens (Human)</i></b>                             |                  |                             |               |               |                    |
|                                                                                      | PLXB2_HUMAN      | K.VGVSQQPEDSQDLPGER.H       | 2             | 2.6563        | O15031             |
|                                                                                      | PLXB2_HUMAN      | K.VGVSQQPEDSQDLPGER.H       | 2             | 3.1723        | O15031             |
| <b><i>PNAS-117 - Homo sapiens (Human)</i></b>                                        |                  |                             |               |               |                    |
|                                                                                      | Q9HB66_HUMA      | K.NDDIPEQDSLGLSNLQK.S       | 2             | 3.2392        | Q9HB66             |
| <b><i>Polypeptide N-acetylgalactosaminyltransferase 2 - Homo sapiens (Human)</i></b> |                  |                             |               |               |                    |
|                                                                                      | GALT2_HUMAN      | K.EIILVDDYSNDPEDGALLGK.I    | 2             | 2.6426        | Q10471             |
| <b><i>Polypyrimidine tract-binding protein 1 - Homo sapiens (Human)</i></b>          |                  |                             |               |               |                    |
|                                                                                      | PTBP1_HUMAN      | K.LPIDVTEGEVISLGLPFGK.V     | 2             | 2.8523        | P26599             |
|                                                                                      | PTBP1_HUMAN      | K.LPIDVTEGEVISLGLPFGK.V     | 2             | 3.0954        | P26599             |
| <b><i>PRA1 family protein 3 - Homo sapiens (Human)</i></b>                           |                  |                             |               |               |                    |
|                                                                                      | PRAF3_HUMAN      | R.TPMGIVLDALEQQEEGINR.L     | 2             | 4.0004        | O75915             |
|                                                                                      | PRAF3_HUMAN      | R.TPMGIVLDALEQQEEGINR.L     | 2             | 2.9833        | O75915             |
|                                                                                      | PRAF3_HUMAN      | R.TPMGIVLDALEQQEEGINR.L     | 2             | 4.2085        | O75915             |
|                                                                                      | PRAF3_HUMAN      | R.TPMGIVLDALEQQEEGINR.L     | 2             | 3.6452        | O75915             |
| <b><i>Probable E3 ubiquitin-protein ligase KIAA1333 - Homo sapiens (Human)</i></b>   |                  |                             |               |               |                    |
|                                                                                      | K1333_HUMAN      | K.KHVL PNSNNGITDCLLEESSPK.L | 2             | 2.8615        | Q7L622             |
| <b><i>Probable phospholipid-transporting ATPase IIA - Homo sapiens (Human)</i></b>   |                  |                             |               |               |                    |
|                                                                                      | ATP9A_HUMAN      | K.EVNSQVYSRLTAR.G           | 2             | 2.482         | O75110             |
| <b><i>Prohibitin - Homo sapiens (Human)</i></b>                                      |                  |                             |               |               |                    |
|                                                                                      | PHB_HUMAN        | K.DLQNVNITLR.I              | 2             | 2.9235        | P35232             |
|                                                                                      | PHB_HUMAN        | K.DLQNVNITLR.I              | 2             | 2.4772        | P35232             |
| <b><i>Prolactin - Homo sapiens (Human)</i></b>                                       |                  |                             |               |               |                    |
|                                                                                      | Q5I0G2_HUMAN     | R.GM*QEAPAILSKAVEIEEQTKR.L  | 2             | 2.6141        | Q5I0G2             |
| <b><i>Prostaglandin G/H synthase 1 precursor - Homo sapiens (Human)</i></b>          |                  |                             |               |               |                    |
|                                                                                      | PGH1_HUMAN       | R.VPDASQDDGPAVERPSTEL.-     | 2             | 3.1381        | P23219             |
| <b><i>Proteasome activator complex subunit 1 - Homo sapiens (Human)</i></b>          |                  |                             |               |               |                    |
|                                                                                      | PSME1_HUMAN      | R.IEDGNFVGVAQEK.V           | 2             | 3.3336        | Q06323             |
| <b><i>Proteasome activator complex subunit 2 - Homo sapiens (Human)</i></b>          |                  |                             |               |               |                    |
|                                                                                      | PSME2_HUMAN      | K.IEDGNDFGVAIQEK.V          | 2             | 4.0667        | Q9UL46             |
| <b><i>Proteasome subunit alpha type 5 - Homo sapiens (Human)</i></b>                 |                  |                             |               |               |                    |
|                                                                                      | PSA5_HUMAN       | R.PFGVALLFGGVDEK.G          | 2             | 3.3313        | P28066             |
|                                                                                      | PSA5_HUMAN       | R.PFGVALLFGGVDEK.G          | 2             | 2.5205        | P28066             |

| <i>Protein</i>                                                                   | <i>Reference</i> | <i>Peptide sequence</i> | <i>Charge</i> | <i>XCorr*</i> | <i>Accession**</i> |
|----------------------------------------------------------------------------------|------------------|-------------------------|---------------|---------------|--------------------|
| <b><i>Proteasome-associated protein ECM29 homolog - Homo sapiens (Human)</i></b> |                  |                         |               |               |                    |
|                                                                                  | ECM29_HUMAN      | K.DIALVQQLFEALC#K.E     | 2             | 2.6854        | Q5VYK3             |
| <b><i>Protein FAM49A - Homo sapiens (Human)</i></b>                              |                  |                         |               |               |                    |
|                                                                                  | FA49A_HUMAN      | R.NPAIQNDFSYYR.R        | 2             | 3.2224        | Q9H0Q0             |
|                                                                                  | FA49A_HUMAN      | R.NPAIQNDFSYYR.R        | 2             | 3.1743        | Q9H0Q0             |
| <b><i>Protein FAM49B - Homo sapiens (Human)</i></b>                              |                  |                         |               |               |                    |
|                                                                                  | FA49B_HUMAN      | R.INNVPAEGENEVNNELANR.M | 2             | 3.8214        | Q9NUQ9             |
|                                                                                  | FA49B_HUMAN      | R.INNVPAEGENEVNNELANR.M | 2             | 2.909         | Q9NUQ9             |
|                                                                                  | FA49B_HUMAN      | R.INNVPAEGENEVNNELANR.M | 2             | 3.5802        | Q9NUQ9             |
| <b><i>Protein flightless-1 homolog - Homo sapiens (Human)</i></b>                |                  |                         |               |               |                    |
|                                                                                  | FLII_HUMAN       | R.VPEC#LYTLPSLR.R       | 2             | 2.3969        | Q13045             |
| <b><i>Protein LYRIC - Homo sapiens (Human)</i></b>                               |                  |                         |               |               |                    |
|                                                                                  | LYRIC_HUMAN      | R.SWQDELAQQAEEGSAR.L    | 2             | 3.8325        | Q86UE4             |
|                                                                                  | LYRIC_HUMAN      | R.SWQDELAQQAEEGSAR.L    | 2             | 3.4109        | Q86UE4             |
|                                                                                  | LYRIC_HUMAN      | R.SWQDELAQQAEEGSAR.L    | 2             | 3.4672        | Q86UE4             |
| <b><i>Protein MYSM1 - Homo sapiens (Human)</i></b>                               |                  |                         |               |               |                    |
|                                                                                  | MYSM1_HUMAN      | K.YLNKTSVRPGLK.N        | 2             | 2.3645        | Q5VVJ2             |
|                                                                                  | MYSM1_HUMAN      | K.YLNKTSVRPGLK.N        | 2             | 2.4927        | Q5VVJ2             |
| <b><i>Protein S100-A10 - Homo sapiens (Human)</i></b>                            |                  |                         |               |               |                    |
|                                                                                  | S10AA_HUMAN      | K.EFPGFLENQKDPLAVDK.I   | 2             | 2.528         | P60903             |
| <b><i>Protein S100-A9 - Homo sapiens (Human)</i></b>                             |                  |                         |               |               |                    |
|                                                                                  | S10A9_HUMAN      | R.NIETIINTFHQYSVK.L     | 2             | 3.0307        | P06702             |
|                                                                                  | S10A9_HUMAN      | R.NIETIINTFHQYSVK.L     | 2             | 2.5724        | P06702             |
|                                                                                  | S10A9_HUMAN      | K.VIEHIMEDLDTNADK.Q     | 2             | 4.075         | P06702             |
|                                                                                  | S10A9_HUMAN      | R.NIETIINTFHQYSVK.L     | 2             | 3.6855        | P06702             |
|                                                                                  | S10A9_HUMAN      | K.VIEHIMEDLDTNADK.Q     | 2             | 2.801         | P06702             |
|                                                                                  | S10A9_HUMAN      | R.NIETIINTFHQYSVK.L     | 2             | 3.2921        | P06702             |
|                                                                                  | S10A9_HUMAN      | K.VIEHIMEDLDTNADK.Q     | 2             | 3.8949        | P06702             |
|                                                                                  | S10A9_HUMAN      | R.NIETIINTFHQYSVK.L     | 2             | 3.3053        | P06702             |
| <b><i>Protein-arginine deiminase type-4 - Homo sapiens (Human)</i></b>           |                  |                         |               |               |                    |
|                                                                                  | PADI4_HUMAN      | R.ELGLAESDIIDIPQLFK.L   | 2             | 3.5022        | Q9UM07             |
|                                                                                  | PADI4_HUMAN      | R.ELGLAESDIIDIPQLFK.L   | 2             | 2.8027        | Q9UM07             |
| <b><i>Proteolipid protein 2 - Homo sapiens (Human)</i></b>                       |                  |                         |               |               |                    |
|                                                                                  | PLP2_HUMAN       | R.HTAAPTDPADGPV.-       | 2             | 2.3044        | Q04941             |

| <i>Protein</i>                                                                                   | <i>Reference</i> | <i>Peptide sequence</i>      | <i>Charge</i> | <i>XCorr*</i> | <i>Accession**</i> |
|--------------------------------------------------------------------------------------------------|------------------|------------------------------|---------------|---------------|--------------------|
|                                                                                                  | PLP2_HUMAN       | R.HTAAPTDPADGPV.-            | 2             | 2.5675        | Q04941             |
|                                                                                                  | PLP2_HUMAN       | R.HTAAPTDPADGPV.-            | 2             | 2.5419        | Q04941             |
|                                                                                                  | PLP2_HUMAN       | R.HTAAPTDPADGPV.-            | 2             | 2.4839        | Q04941             |
|                                                                                                  | PLP2_HUMAN       | R.HTAAPTDPADGPV.-            | 2             | 2.8498        | Q04941             |
|                                                                                                  | PLP2_HUMAN       | R.HTAAPTDPADGPV.-            | 2             | 3.0994        | Q04941             |
| <b><i>Putative eukaryotic translation initiation factor 3 subunit - Homo sapiens (Human)</i></b> |                  |                              |               |               |                    |
|                                                                                                  | IF3X_HUMAN       | R.FLENALAVSTKYHGPK.A         | 2             | 2.3743        | O75153             |
| <b><i>Putative FelC - Homo sapiens (Human)</i></b>                                               |                  |                              |               |               |                    |
|                                                                                                  | Q13718_HUMAN     | -.M*AAQSSLYNDDRNLLR.I        | 2             | 2.4014        | Q13718             |
| <b><i>Putative uncharacterized protein - Homo sapiens (Human)</i></b>                            |                  |                              |               |               |                    |
|                                                                                                  | A5PLL5_HUMAN     | R.MPTTQETDGFQVK.R            | 2             | 2.3961        | A5PLL5             |
| <b><i>Putative uncharacterized protein DKFZp667I133 - Homo sapiens (Human)</i></b>               |                  |                              |               |               |                    |
|                                                                                                  | Q8ND71_HUMA      | R.FQDC#VNEAASQEGDKPQGPR.E    | 3             | 3.9934        | Q8ND71             |
| <b><i>Pyruvate kinase isozymes M1/M2 - Homo sapiens (Human)</i></b>                              |                  |                              |               |               |                    |
|                                                                                                  | KPYM_HUMAN       | R.LAPITSDPTEATAVGAVEASF.K    | 2             | 3.5465        | P14618             |
| <b><i>Rab11 family-interacting protein 4 - Homo sapiens (Human)</i></b>                          |                  |                              |               |               |                    |
|                                                                                                  | RFIP4_HUMAN      | K.KVTELENDSLTNGDLK.S         | 2             | 2.4623        | Q86YS3             |
| <b><i>Ras GTPase-activating-like protein IQGAP1 - Homo sapiens (Human)</i></b>                   |                  |                              |               |               |                    |
|                                                                                                  | IQGA1_HUMAN      | R.EEIQSSISGVTAAYNR.E         | 2             | 3.3718        | P46940             |
|                                                                                                  | IQGA1_HUMAN      | K.VDFTEEEINNMK.T             | 2             | 2.3191        | P46940             |
|                                                                                                  | IQGA1_HUMAN      | K.VNTFSALANIDLALAQGDALALFR.A | 2             | 4.1825        | P46940             |
|                                                                                                  | IQGA1_HUMAN      | K.LPYDVTPEQALAHAEVK.T        | 3             | 3.7506        | P46940             |
|                                                                                                  | IQGA1_HUMAN      | K.SWVNQM*ESQTGEASK.L         | 2             | 2.4431        | P46940             |
|                                                                                                  | IQGA1_HUMAN      | K.FDVPGDENAEMDAR.T           | 2             | 2.8816        | P46940             |
|                                                                                                  | IQGA1_HUMAN      | R.ILAIGLINEALDEGDAQK.T       | 2             | 5.6551        | P46940             |
|                                                                                                  | IQGA1_HUMAN      | K.VNTFSALANIDLALAQGDALALFR.A | 2             | 2.5769        | P46940             |
|                                                                                                  | IQGA1_HUMAN      | K.FALGIFAINAEVSGDVGK.T       | 2             | 3.4599        | P46940             |
|                                                                                                  | IQGA1_HUMAN      | K.FDVPGDENAEMDAR.T           | 2             | 3.167         | P46940             |
|                                                                                                  | IQGA1_HUMAN      | K.NVIFEISPTTEEVGDFEVK.A      | 2             | 2.9897        | P46940             |
|                                                                                                  | IQGA1_HUMAN      | K.FALGIFAINAEVSGDVGK.T       | 2             | 3.0735        | P46940             |
|                                                                                                  | IQGA1_HUMAN      | R.ILAIGLINEALDEGDAQK.T       | 2             | 3.8248        | P46940             |
|                                                                                                  | IQGA1_HUMAN      | K.FALGIFAINAEVSGDVGK.T       | 2             | 2.7108        | P46940             |
|                                                                                                  | IQGA1_HUMAN      | K.FALGIFAINAEVSGDVGK.T       | 2             | 3.5592        | P46940             |
|                                                                                                  | IQGA1_HUMAN      | R.ILAIGLINEALDEGDAQK.T       | 2             | 3.1648        | P46940             |

| <i>Protein</i>                                                                 | <i>Reference</i> | <i>Peptide sequence</i>      | <i>Charge</i> | <i>XCorr*</i> | <i>Accession**</i> |
|--------------------------------------------------------------------------------|------------------|------------------------------|---------------|---------------|--------------------|
|                                                                                | IQGA1_HUMAN      | K.NVIFEISPTEEVGDFEVK.A       | 2             | 5.3172        | P46940             |
|                                                                                | IQGA1_HUMAN      | R.ILAIGLINEALDEGDAQK.T       | 3             | 4.7887        | P46940             |
|                                                                                | IQGA1_HUMAN      | K.NVIFEISPTEEVGDFEVK.A       | 2             | 2.6884        | P46940             |
|                                                                                | IQGA1_HUMAN      | K.FDVPGDENAEMDAR.T           | 2             | 3.0708        | P46940             |
|                                                                                | IQGA1_HUMAN      | K.FALGIFAINAEVESGDVGK.T      | 2             | 3.7686        | P46940             |
|                                                                                | IQGA1_HUMAN      | K.VNTFSALANIDLALEQQDALALFR.A | 2             | 4.0653        | P46940             |
|                                                                                | IQGA1_HUMAN      | K.EELQSGVDAANSAAQQYQR.R      | 2             | 4.395         | P46940             |
|                                                                                | IQGA1_HUMAN      | K.FDVPGDENAEMDAR.T           | 2             | 3.2561        | P46940             |
|                                                                                | IQGA1_HUMAN      | K.FDVPGDENAEMDAR.T           | 2             | 2.6803        | P46940             |
|                                                                                | IQGA1_HUMAN      | K.LPYDVTPEQALAHEEVK.T        | 3             | 4.9969        | P46940             |
|                                                                                | IQGA1_HUMAN      | K.EELQSGVDAANSAAQQYQR.R      | 2             | 5.2487        | P46940             |
| <b><i>Ras GTPase-activating-like protein IQGAP2 - Homo sapiens (Human)</i></b> |                  |                              |               |               |                    |
|                                                                                | IQGA2_HUMAN      | K.LPYDVTTEQALTYPEVK.N        | 2             | 4.1092        | Q13576             |
|                                                                                | IQGA2_HUMAN      | K.LPYDVTTEQALTYPEVK.N        | 2             | 3.9454        | Q13576             |
| <b><i>RAS guanyl-releasing protein 4 - Homo sapiens (Human)</i></b>            |                  |                              |               |               |                    |
|                                                                                | Q8TDF6_HUMA      | R.HPEVMHQDPQLEEVIGR.F        | 2             | 2.3194        | Q8TDF6             |
| <b><i>Ras-related protein Rab-10 - Homo sapiens (Human)</i></b>                |                  |                              |               |               |                    |
|                                                                                | RAB10_HUMAN      | R.NIDEHANEDVER.M             | 2             | 2.8393        | P61026             |
| <b><i>Ras-related protein Rab-11B - Homo sapiens (Human)</i></b>               |                  |                              |               |               |                    |
|                                                                                | RB11B_HUMAN      | K.NNLSFIETSALDSTNVVEEAFK.N   | 2             | 2.656         | Q15907             |
| <b><i>Ras-related protein Rab-14 - Homo sapiens (Human)</i></b>                |                  |                              |               |               |                    |
|                                                                                | RAB14_HUMAN      | K.TGENVEDAFLEAAK.K           | 2             | 2.5646        | P61106             |
|                                                                                | RAB14_HUMAN      | K.TGENVEDAFLEAAK.K           | 2             | 3.1756        | P61106             |
| <b><i>Ras-related protein Rab-1A - Homo sapiens (Human)</i></b>                |                  |                              |               |               |                    |
|                                                                                | RAB1A_HUMAN      | R.FADDTYTESYISTIGVDFK.I      | 2             | 2.8032        | P62820             |
|                                                                                | RAB1A_HUMAN      | R.FADDTYTESYISTIGVDFK.I      | 2             | 2.7021        | P62820             |
|                                                                                | RAB1A_HUMAN      | R.FADDTYTESYISTIGVDFK.I      | 2             | 2.4796        | P62820             |
| <b><i>Ras-related protein Rab-2A - Homo sapiens (Human)</i></b>                |                  |                              |               |               |                    |
|                                                                                | RAB2A_HUMAN      | K.TASNVEEAFINTAK.E           | 2             | 3.1125        | P61019             |
| <b><i>Ras-related protein Rab-35 - Homo sapiens (Human)</i></b>                |                  |                              |               |               |                    |
|                                                                                | RAB35_HUMAN      | K.ENVNVEEMFNC#ITELVLR.A      | 2             | 3.3701        | Q15286             |
| <b><i>Ras-related protein Rab-3A - Homo sapiens (Human)</i></b>                |                  |                              |               |               |                    |
|                                                                                | RAB3A_HUMAN      | R.YADDSFTPAFVSTVGIDFK.V      | 2             | 2.3544        | P20336             |
| <b><i>Ras-related protein Rab-3D - Homo sapiens (Human)</i></b>                |                  |                              |               |               |                    |

| <i>Protein</i>                                                                         | <i>Reference</i> | <i>Peptide sequence</i>      | <i>Charge</i> | <i>XCorr*</i> | <i>Accession**</i> |
|----------------------------------------------------------------------------------------|------------------|------------------------------|---------------|---------------|--------------------|
|                                                                                        | RAB3D_HUMAN      | R.DAADQNFDYMFK.L             | 2             | 2.3637        | Q95716             |
| <b><i>Ras-related protein Rab-5C - Homo sapiens (Human)</i></b>                        |                  |                              |               |               |                    |
|                                                                                        | RAB5C_HUMAN      | R.GVDLQENNPASR.S             | 2             | 2.9106        | P51148             |
| <b><i>Ras-related protein Rab-8A - Homo sapiens (Human)</i></b>                        |                  |                              |               |               |                    |
|                                                                                        | RAB8A_HUMAN      | R.NIEEHASADVEK.M             | 2             | 3.5976        | P61006             |
| <b><i>Ras-related protein Rab-8B - Homo sapiens (Human)</i></b>                        |                  |                              |               |               |                    |
|                                                                                        | RAB8B_HUMAN      | R.NIEEHASSDVER.M             | 2             | 2.5892        | Q92930             |
| <b><i>Receptor expression-enhancing protein 5 - Homo sapiens (Human)</i></b>           |                  |                              |               |               |                    |
|                                                                                        | REEP5_HUMAN      | K.HESQMDSVVK.D               | 2             | 2.8247        | Q00765             |
|                                                                                        | REEP5_HUMAN      | K.HESQMDSVVK.D               | 2             | 2.3422        | Q00765             |
| <b><i>RER1 retention in endoplasmic reticulum 1 homolog - Homo sapiens (Human)</i></b> |                  |                              |               |               |                    |
|                                                                                        | Q5T091_HUMAN     | K.VDPSLMEDSDDGPSLPTK.Q       | 2             | 3.6413        | Q5T091             |
|                                                                                        | Q5T091_HUMAN     | K.VDPSLMEDSDDGPSLPTK.Q       | 2             | 4.6029        | Q5T091             |
| <b><i>Reticulon-4 - Homo sapiens (Human)</i></b>                                       |                  |                              |               |               |                    |
|                                                                                        | RTN4_HUMAN       | K.NVKDAM*AKIQAK.I            | 2             | 2.3027        | Q9NQC3             |
| <b><i>Retinal dehydrogenase 1 - Homo sapiens (Human)</i></b>                           |                  |                              |               |               |                    |
|                                                                                        | AL1A1_HUMAN      | R.DRLLLATM*ESMNGGK.L         | 2             | 2.699         | P00352             |
|                                                                                        | AL1A1_HUMAN      | R.DRLLLATM*ESMNGGK.L         | 2             | 3.0847        | P00352             |
| <b><i>Rho GDP-dissociation inhibitor 2 - Homo sapiens (Human)</i></b>                  |                  |                              |               |               |                    |
|                                                                                        | GDIS_HUMAN       | K.APEPHVEEDDDDELDSK.L        | 3             | 4.2857        | P52566             |
|                                                                                        | GDIS_HUMAN       | K.APEPHVEEDDDDELDSK.L        | 3             | 3.8527        | P52566             |
|                                                                                        | GDIS_HUMAN       | K.APEPHVEEDDDDELDSK.L        | 3             | 3.9552        | P52566             |
|                                                                                        | GDIS_HUMAN       | K.TLLGDGPVVTDPK.A            | 2             | 2.3597        | P52566             |
| <b><i>Rho GTPase-activating protein 4 - Homo sapiens (Human)</i></b>                   |                  |                              |               |               |                    |
|                                                                                        | RHG04_HUMAN      | R.DLEQQLQDELLEVSELTAK.K      | 2             | 2.3196        | P98171             |
| <b><i>Rho guanine nucleotide exchange factor 1 - Homo sapiens (Human)</i></b>          |                  |                              |               |               |                    |
|                                                                                        | ARHG1_HUMAN      | R.QESGYLIEEIGDVLLAR.F        | 2             | 2.3621        | Q92888             |
|                                                                                        | ARHG1_HUMAN      | R.TQEIQENLLSLEETMK.Q         | 2             | 3.8285        | Q92888             |
| <b><i>Rho/rac guanine nucleotide exchange factor - Homo sapiens (Human)</i></b>        |                  |                              |               |               |                    |
|                                                                                        | Q5VY92_HUMA      | K.ELLSNVDEGIYQLEK.G          | 2             | 3.2928        | Q5VY92             |
|                                                                                        | Q5VY92_HUMA      | K.ELLSNVDEGIYQLEK.G          | 2             | 2.5413        | Q5VY92             |
| <b><i>Rho-related GTP-binding protein RhoB precursor - Homo sapiens (Human)</i></b>    |                  |                              |               |               |                    |
|                                                                                        | RHOB_HUMAN       | K.DEFPEVYVPTVFENYVADIEVDGK.Q | 2             | 3.2169        | P62745             |

| <i>Protein</i>                                                                      | <i>Reference</i> | <i>Peptide sequence</i>    | <i>Charge</i> | <i>XCorr*</i> | <i>Accession**</i> |
|-------------------------------------------------------------------------------------|------------------|----------------------------|---------------|---------------|--------------------|
| <b><i>Rho-related GTP-binding protein RhoG precursor - Homo sapiens (Human)</i></b> |                  |                            |               |               |                    |
|                                                                                     | RHOG_HUMAN       | R.LKEQGQAPITPQQGQALAK.Q    | 3             | 3.9334        | P84095             |
|                                                                                     | RHOG_HUMAN       | R.YLEC#SALQQDGVK.E         | 2             | 3.3897        | P84095             |
|                                                                                     | RHOG_HUMAN       | R.YLEC#SALQQDGVK.E         | 2             | 3.3702        | P84095             |
| <b><i>Ribonuclease inhibitor - Homo sapiens (Human)</i></b>                         |                  |                            |               |               |                    |
|                                                                                     | RINI_HUMAN       | R.ELC#QGLGQPGSVLR.V        | 2             | 2.6696        | P13489             |
|                                                                                     | RINI_HUMAN       | K.ELSLAGNELGDEGAR.L        | 2             | 3.582         | P13489             |
|                                                                                     | RINI_HUMAN       | R.ELC#QGLGQPGSVLR.V        | 2             | 2.5281        | P13489             |
|                                                                                     | RINI_HUMAN       | K.ELSLAGNELGDEGAR.L        | 2             | 3.3381        | P13489             |
| <b><i>RING finger protein 13 - Homo sapiens (Human)</i></b>                         |                  |                            |               |               |                    |
|                                                                                     | RNF13_HUMAN      | R.LDC#NFDIKVLNAQRAGYK.A    | 2             | 2.5784        | O43567             |
| <b><i>RING finger protein 213 - Homo sapiens (Human)</i></b>                        |                  |                            |               |               |                    |
|                                                                                     | RN213_HUMAN      | R.VPQFSFLDIFPK.V           | 2             | 2.3131        | Q63HN8             |
| <b><i>Roundabout homolog 3 precursor - Homo sapiens (Human)</i></b>                 |                  |                            |               |               |                    |
|                                                                                     | ROBO3_HUMAN      | R.PSFLSRGQGTSTCSTAGSNSSR.G | 2             | 2.4104        | Q96MS0             |
| <b><i>RUN and FYVE domain-containing protein 1 - Homo sapiens (Human)</i></b>       |                  |                            |               |               |                    |
|                                                                                     | RUFY1_HUMAN      | K.ELRELQDEKAELQK.I         | 2             | 2.3532        | Q96T51             |
| <b><i>Sad1/unc-84-like protein 2 - Homo sapiens (Human)</i></b>                     |                  |                            |               |               |                    |
|                                                                                     | UN84B_HUMAN      | R.DDVESQFPAWISQFLAR.G      | 2             | 2.573         | Q9UH99             |
|                                                                                     | UN84B_HUMAN      | R.LEDQLAGLQQELAALALK.Q     | 2             | 4.2275        | Q9UH99             |
|                                                                                     | UN84B_HUMAN      | R.RLEDQLAGLQQELAALALK.Q    | 2             | 4.4353        | Q9UH99             |
|                                                                                     | UN84B_HUMAN      | R.LEDQLAGLQQELAALALK.Q     | 2             | 4.9319        | Q9UH99             |
|                                                                                     | UN84B_HUMAN      | R.LEDQLAGLQQELAALALK.Q     | 2             | 3.6537        | Q9UH99             |
|                                                                                     | UN84B_HUMAN      | R.RLEDQLAGLQQELAALALK.Q    | 2             | 4.6475        | Q9UH99             |
|                                                                                     | UN84B_HUMAN      | R.DDVESQFPAWISQFLAR.G      | 2             | 3.5244        | Q9UH99             |
|                                                                                     | UN84B_HUMAN      | R.RLEDQLAGLQQELAALALK.Q    | 3             | 5.0681        | Q9UH99             |
|                                                                                     | UN84B_HUMAN      | R.LEDQLAGLQQELAALALK.Q     | 2             | 2.9619        | Q9UH99             |
|                                                                                     | UN84B_HUMAN      | R.LEDQLAGLQQELAALALK.Q     | 2             | 3.6562        | Q9UH99             |
|                                                                                     | UN84B_HUMAN      | R.RLEDQLAGLQQELAALALK.Q    | 3             | 4.1026        | Q9UH99             |
|                                                                                     | UN84B_HUMAN      | R.RLEDQLAGLQQELAALALK.Q    | 2             | 4.2884        | Q9UH99             |
|                                                                                     | UN84B_HUMAN      | R.RLEDQLAGLQQELAALALK.Q    | 3             | 5.253         | Q9UH99             |
|                                                                                     | UN84B_HUMAN      | R.RLEDQLAGLQQELAALALK.Q    | 2             | 4.3892        | Q9UH99             |
| <b><i>SAM domain and HD domain-containing protein 1 - Homo sapiens (Human)</i></b>  |                  |                            |               |               |                    |
|                                                                                     | SAMH1_HUMAN      | K.VGNIIDTMITDAFLK.A        | 2             | 4.3886        | Q9Y3Z3             |



| <i>Protein</i>                                                                           | <i>Reference</i> | <i>Peptide sequence</i>  | <i>Charge</i> | <i>XCorr*</i> | <i>Accession**</i> |
|------------------------------------------------------------------------------------------|------------------|--------------------------|---------------|---------------|--------------------|
|                                                                                          | SAMH1_HUMAN      | R.FENLGVSSLGER.K         | 2             | 2.5668        | Q9Y3Z3             |
|                                                                                          | SAMH1_HUMAN      | K.EWNDSTSVQNPTR.L        | 2             | 3.7049        | Q9Y3Z3             |
|                                                                                          | SAMH1_HUMAN      | K.VGNIIDTMITDAFLK.A      | 2             | 4.1847        | Q9Y3Z3             |
|                                                                                          | SAMH1_HUMAN      | R.DC#HHLGIQNNFDYK.R      | 3             | 3.9917        | Q9Y3Z3             |
|                                                                                          | SAMH1_HUMAN      | R.FENLGVSSLGER.K         | 2             | 2.6105        | Q9Y3Z3             |
|                                                                                          | SAMH1_HUMAN      | K.VGNIIDTMITDAFLK.A      | 2             | 4.1225        | Q9Y3Z3             |
| <b><i>Sarcoplasmic/endoplasmic reticulum calcium ATPase 2 - Homo sapiens (Human)</i></b> |                  |                          |               |               |                    |
|                                                                                          | AT2A2_HUMAN      | K.VGEATETALTC#LVEK.M     | 2             | 2.5526        | P16615             |
|                                                                                          | AT2A2_HUMAN      | K.TGTLTTNQMSVC#R.M       | 2             | 3.0718        | P16615             |
| <b><i>Secretory carrier-associated membrane protein 2 - Homo sapiens (Human)</i></b>     |                  |                          |               |               |                    |
|                                                                                          | SCAM2_HUMAN      | R.TGASFQQAQEEFSQGIFSSR.T | 2             | 4.9244        | O15127             |
|                                                                                          | SCAM2_HUMAN      | R.TGASFQQAQEEFSQGIFSSR.T | 2             | 4.4005        | O15127             |
|                                                                                          | SCAM2_HUMAN      | R.TGASFQQAQEEFSQGIFSSR.T | 2             | 3.1361        | O15127             |
| <b><i>Secretory carrier-associated membrane protein 3 - Homo sapiens (Human)</i></b>     |                  |                          |               |               |                    |
|                                                                                          | SCAM3_HUMAN      | K.NYGSYSTQASAAAATAELLK.K | 2             | 3.2372        | O14828             |
| <b><i>Septin-9 - Homo sapiens (Human)</i></b>                                            |                  |                          |               |               |                    |
|                                                                                          | SEPT9_HUMAN      | K.APVDFGYVGIDSILEQMR.R   | 2             | 2.9614        | Q9UHD8             |
| <b><i>Serine palmitoyltransferase 2 - Homo sapiens (Human)</i></b>                       |                  |                          |               |               |                    |
|                                                                                          | LCB2_HUMAN       | R.LVPLLLDRPFDETTYEETED.- | 2             | 2.5016        | O15270             |
| <b><i>Serine/threonine-protein kinase 31 - Homo sapiens (Human)</i></b>                  |                  |                          |               |               |                    |
|                                                                                          | STK31_HUMAN      | R.MKNLAAKM*EILK.E        | 2             | 2.4812        | Q9BXU1             |
| <b><i>Sestrin-1 - Homo sapiens (Human)</i></b>                                           |                  |                          |               |               |                    |
|                                                                                          | SESN1_HUMAN      | K.VYIKTVVC#TPEK.V        | 2             | 2.3656        | Q9Y6P5             |
| <b><i>SH2 domain-containing protein 2A - Homo sapiens (Human)</i></b>                    |                  |                          |               |               |                    |
|                                                                                          | SH2A_HUMAN       | K.QGQAPVPMQKEGAGEK.E     | 2             | 2.4946        | Q9NP31             |
| <b><i>Sialic acid-binding Ig-like lectin 9 precursor - Homo sapiens (Human)</i></b>      |                  |                          |               |               |                    |
|                                                                                          | SIGL9_HUMAN      | R.EGANTDQDAPVATNNPAR.A   | 2             | 3.0073        | Q9Y336             |
|                                                                                          | SIGL9_HUMAN      | R.EGANTDQDAPVATNNPAR.A   | 2             | 3.2946        | Q9Y336             |
|                                                                                          | SIGL9_HUMAN      | R.EGANTDQDAPVATNNPAR.A   | 2             | 3.3121        | Q9Y336             |
|                                                                                          | SIGL9_HUMAN      | R.PAAGVGDTGIEDANAVR.G    | 2             | 4.4161        | Q9Y336             |
| <b><i>Sideroflexin-1 - Homo sapiens (Human)</i></b>                                      |                  |                          |               |               |                    |
|                                                                                          | SFXN1_HUMAN      | R.NILLTNEQLESAR.K        | 2             | 2.9443        | Q9H9B4             |
| <b><i>Sideroflexin-3 - Homo sapiens (Human)</i></b>                                      |                  |                          |               |               |                    |
|                                                                                          | SFXN3_HUMAN      | R.NLLLSGAQLEASR.N        | 2             | 2.8707        | Q9BWM7             |

| <i>Protein</i>                                                                                      | <i>Reference</i> | <i>Peptide sequence</i>    | <i>Charge</i> | <i>XCorr*</i> | <i>Accession**</i> |
|-----------------------------------------------------------------------------------------------------|------------------|----------------------------|---------------|---------------|--------------------|
|                                                                                                     | SFXN3_HUMAN      | R.ELQVGIPVADEAGQR.L        | 2             | 2.4752        | Q9BWM7             |
| <b><i>Signal peptidase complex subunit 2 - Homo sapiens (Human)</i></b>                             |                  |                            |               |               |                    |
|                                                                                                     | SPCS2_HUMAN      | K.FFDHSGTLVMDAYEPEISR.L    | 3             | 4.6988        | Q15005             |
|                                                                                                     | SPCS2_HUMAN      | K.FFDHSGTLVMDAYEPEISR.L    | 2             | 3.239         | Q15005             |
|                                                                                                     | SPCS2_HUMAN      | K.DPTGMDPDDIWQLSSSLK.R     | 2             | 4.3524        | Q15005             |
|                                                                                                     | SPCS2_HUMAN      | K.FFDHSGTLVMDAYEPEISR.L    | 3             | 3.9417        | Q15005             |
|                                                                                                     | SPCS2_HUMAN      | K.DPTGMDPDDIWQLSSSLK.R     | 2             | 2.5085        | Q15005             |
| <b><i>Signal recognition particle receptor subunit beta - Homo sapiens (Human)</i></b>              |                  |                            |               |               |                    |
|                                                                                                     | SRPRB_HUMAN      | R.GDVGSADIQDLEK.W          | 2             | 2.6232        | Q9Y5M8             |
|                                                                                                     | SRPRB_HUMAN      | K.DVAEFLYQVLIDSMGLK.N      | 3             | 3.8801        | Q9Y5M8             |
| <b><i>Signal transducer and activator of transcription 1-alpha/beta - Homo sapiens (Human)</i></b>  |                  |                            |               |               |                    |
|                                                                                                     | STAT1_HUMAN      | K.SLEDLQDEYDFK.C           | 2             | 2.7764        | P42224             |
|                                                                                                     | STAT1_HUMAN      | K.SLEDLQDEYDFK.C           | 2             | 3.0401        | P42224             |
| <b><i>Signal transducer and activator of transcription 3 - Homo sapiens (Human)</i></b>             |                  |                            |               |               |                    |
|                                                                                                     | STAT3_HUMAN      | R.GLSIEQLTTLAEK.L          | 2             | 2.6412        | P40763             |
| <b><i>Sister chromatid cohesion protein PDS5 homolog A - Homo sapiens (Human)</i></b>               |                  |                            |               |               |                    |
|                                                                                                     | PDS5A_HUMAN      | K.SIEGTADDEEEGVSPDTAIR.S   | 2             | 3.5516        | Q29RF7             |
|                                                                                                     | PDS5A_HUMAN      | K.SIEGTADDEEEGVSPDTAIR.S   | 2             | 3.1146        | Q29RF7             |
| <b><i>Sodium/potassium-transporting ATPase subunit alpha-1 precursor - Homo sapiens (Human)</i></b> |                  |                            |               |               |                    |
|                                                                                                     | AT1A1_HUMAN      | K.GVGIISEGNETVEDIAAR.L     | 2             | 3.0033        | P05023             |
|                                                                                                     | AT1A1_HUMAN      | R.SPFTNENPLETR.N           | 2             | 3.5539        | P05023             |
|                                                                                                     | AT1A1_HUMAN      | K.GVGIISEGNETVEDIAAR.L     | 2             | 2.5543        | P05023             |
|                                                                                                     | AT1A1_HUMAN      | R.SPFTNENPLETR.N           | 2             | 3.5642        | P05023             |
|                                                                                                     | AT1A1_HUMAN      | R.SPFTNENPLETR.N           | 2             | 4.1722        | P05023             |
|                                                                                                     | AT1A1_HUMAN      | K.GVGIISEGNETVEDIAAR.L     | 2             | 3.8951        | P05023             |
|                                                                                                     | AT1A1_HUMAN      | K.VDNSSLTGESEPQTR.S        | 2             | 2.6003        | P05023             |
| <b><i>Solute carrier family 25 member 24. - Homo sapiens (Human)</i></b>                            |                  |                            |               |               |                    |
|                                                                                                     | Q6NUK1_HUMA      | K.HEGLGAFYK.G              | 2             | 2.5737        | Q6NUK1             |
|                                                                                                     | Q6NUK1_HUMA      | R.DYFLFNPVTDIEIIR.F        | 2             | 2.873         | Q6NUK1             |
|                                                                                                     | Q6NUK1_HUMA      | K.HSTGIDIGDSLTPDEFTEDEKK.S | 3             | 3.9435        | Q6NUK1             |
| <b><i>Solute carrier family 30 - Homo sapiens (Human)</i></b>                                       |                  |                            |               |               |                    |
|                                                                                                     | Q5SQG7_HUMA      | R.TPPLENSLPQC#YQR.V        | 2             | 2.4829        | Q5SQG7             |
|                                                                                                     | Q5SQG7_HUMA      | R.TPPLENSLPQC#YQR.V        | 2             | 2.5712        | Q5SQG7             |
|                                                                                                     | Q5SQG7_HUMA      | R.TPPLENSLPQC#YQR.V        | 2             | 3.0851        | Q5SQG7             |

| <i>Protein</i>                                                                               | <i>Reference</i> | <i>Peptide sequence</i>   | <i>Charge</i> | <i>XCorr*</i> | <i>Accession**</i> |
|----------------------------------------------------------------------------------------------|------------------|---------------------------|---------------|---------------|--------------------|
| <b><i>Solute carrier family 39 member 11 - Homo sapiens (Human)</i></b>                      |                  |                           |               |               |                    |
|                                                                                              | Q8N1S5_HUMA      | K.SDPEGPALLFPESELSIR.I    | 2             | 3.2091        | Q8N1S5             |
|                                                                                              | Q8N1S5_HUMA      | K.SDPEGPALLFPESELSIR.I    | 2             | 3.0239        | Q8N1S5             |
|                                                                                              | Q8N1S5_HUMA      | K.SDPEGPALLFPESELSIR.I    | 2             | 3.3659        | Q8N1S5             |
| <b><i>Sorting and assembly machinery component 50 homolog - Homo sapiens (Human)</i></b>     |                  |                           |               |               |                    |
|                                                                                              | SAM50_HUMAN      | K.DDIIC#EIGDVFK.A         | 2             | 3.1202        | Q9Y512             |
|                                                                                              | SAM50_HUMAN      | K.DDIIC#EIGDVFK.A         | 2             | 3.1559        | Q9Y512             |
|                                                                                              | SAM50_HUMAN      | K.DDIIC#EIGDVFK.A         | 2             | 3.4957        | Q9Y512             |
| <b><i>Spliceosome RNA helicase BAT1 - Homo sapiens (Human)</i></b>                           |                  |                           |               |               |                    |
|                                                                                              | UAP56_HUMAN      | K.FMQDPMEIFVDETK.L        | 2             | 3.1638        | Q13838             |
| <b><i>Splicing factor 3B subunit 1 - Homo sapiens (Human)</i></b>                            |                  |                           |               |               |                    |
|                                                                                              | SF3B1_HUMAN      | R.SLVEIIEHGLVDEQQK.V      | 2             | 2.4365        | O75533             |
| <b><i>Structural maintenance of chromosomes protein 6 - Homo sapiens (Human)</i></b>         |                  |                           |               |               |                    |
|                                                                                              | SMC6_HUMAN       | R.IEELKKSTDQSLEPER.L      | 2             | 2.5436        | Q96SB8             |
|                                                                                              | SMC6_HUMAN       | R.IEELKKSTDQSLEPER.L      | 2             | 2.6797        | Q96SB8             |
| <b><i>Sulfide:quinone oxidoreductase, mitochondrial precursor - Homo sapiens (Human)</i></b> |                  |                           |               |               |                    |
|                                                                                              | SQRD_HUMAN       | K.VGAENVAIVEPSE.H         | 2             | 2.7918        | Q9Y6N5             |
|                                                                                              | SQRD_HUMAN       | K.EGNAIFTFPNTPVK.C        | 2             | 2.596         | Q9Y6N5             |
|                                                                                              | SQRD_HUMAN       | K.VGAENVAIVEPSE.H         | 2             | 2.8302        | Q9Y6N5             |
|                                                                                              | SQRD_HUMAN       | K.EGNAIFTFPNTPVK.C        | 2             | 3.5034        | Q9Y6N5             |
|                                                                                              | SQRD_HUMAN       | K.VGAENVAIVEPSE.H         | 2             | 3.1753        | Q9Y6N5             |
|                                                                                              | SQRD_HUMAN       | K.EGNAIFTFPNTPVK.C        | 2             | 2.7729        | Q9Y6N5             |
|                                                                                              | SQRD_HUMAN       | K.EGNAIFTFPNTPVK.C        | 2             | 3.1047        | Q9Y6N5             |
|                                                                                              | SQRD_HUMAN       | K.VGAENVAIVEPSE.H         | 2             | 3.0286        | Q9Y6N5             |
| <b><i>Sulfotransferase 1A1 - Homo sapiens (Human)</i></b>                                    |                  |                           |               |               |                    |
|                                                                                              | ST1A1_HUMAN      | K.SGTTWVSQILDMIYQGGDLEK.C | 2             | 3.5656        | P50225             |
| <b><i>Surfeit locus protein 4 - Homo sapiens (Human)</i></b>                                 |                  |                           |               |               |                    |
|                                                                                              | SURF4_HUMAN      | R.NLALGGGLLLLLAESR.S      | 2             | 3.7927        | O15260             |
|                                                                                              | SURF4_HUMAN      | R.NLALGGGLLLLLAESR.S      | 2             | 2.3637        | O15260             |
| <b><i>Syntaxin-7 - Homo sapiens (Human)</i></b>                                              |                  |                           |               |               |                    |
|                                                                                              | STX7_HUMAN       | R.TLNQLGTPQDSPELR.Q       | 2             | 2.7059        | O15400             |
|                                                                                              | STX7_HUMAN       | R.TLNQLGTPQDSPELR.Q       | 2             | 4.1909        | O15400             |
|                                                                                              | STX7_HUMAN       | R.TLNQLGTPQDSPELR.Q       | 2             | 3.2468        | O15400             |
|                                                                                              | STX7_HUMAN       | R.TLNQLGTPQDSPELR.Q       | 2             | 3.3931        | O15400             |

| <i>Protein</i>                                                             | <i>Reference</i> | <i>Peptide sequence</i>        | <i>Charge</i> | <i>XCorr*</i> | <i>Accession**</i> |
|----------------------------------------------------------------------------|------------------|--------------------------------|---------------|---------------|--------------------|
|                                                                            | STX7_HUMAN       | R.TLNQLGTPQDSPELR.Q            | 2             | 3.1243        | O15400             |
| <b><i>Talin-1 - Homo sapiens (Human)</i></b>                               |                  |                                |               |               |                    |
|                                                                            | TLN1_HUMAN       | R.GVGAAATAVTQALNELLQHVK.A      | 2             | 4.7856        | Q9Y490             |
|                                                                            | TLN1_HUMAN       | R.GVAALTSDDPAVQAIVLDTASDVLDK.A | 2             | 3.5189        | Q9Y490             |
|                                                                            | TLN1_HUMAN       | K.EVIQEWNLNLIK.R               | 2             | 2.8209        | Q9Y490             |
|                                                                            | TLN1_HUMAN       | K.LGAASLGAEDPETQVVLINAVK.D     | 2             | 2.497         | Q9Y490             |
|                                                                            | TLN1_HUMAN       | R.IPEAPAGPPSDFGLFLSDDDPK.K     | 2             | 3.3338        | Q9Y490             |
| <b><i>TBC1 domain family member 9B - Homo sapiens (Human)</i></b>          |                  |                                |               |               |                    |
|                                                                            | TBC9B_HUMAN      | R.ALLSSSDPPAEVDIFELLK.V        | 2             | 2.6501        | Q66K14             |
| <b><i>T-complex protein 1 subunit delta - Homo sapiens (Human)</i></b>     |                  |                                |               |               |                    |
|                                                                            | TCPD_HUMAN       | R.DALSDLALHFLNK.M              | 2             | 3.7624        | P50991             |
| <b><i>T-complex protein 1 subunit eta - Homo sapiens (Human)</i></b>       |                  |                                |               |               |                    |
|                                                                            | TCPH_HUMAN       | K.LPIGDVATQYFADR.D             | 2             | 2.5176        | Q99832             |
|                                                                            | TCPH_HUMAN       | K.LPIGDVATQYFADR.D             | 2             | 2.6608        | Q99832             |
| <b><i>T-complex protein 1 subunit gamma - Homo sapiens (Human)</i></b>     |                  |                                |               |               |                    |
|                                                                            | TCPG_HUMAN       | K.IPGGIIEDSC#VLR.G             | 2             | 3.0212        | P49368             |
|                                                                            | TCPG_HUMAN       | K.IPGGIIEDSC#VLR.G             | 2             | 3.3355        | P49368             |
|                                                                            | TCPG_HUMAN       | K.IPGGIIEDSC#VLR.G             | 2             | 3.3376        | P49368             |
|                                                                            | TCPG_HUMAN       | K.IPGGIIEDSC#VLR.G             | 2             | 3.3776        | P49368             |
| <b><i>Tetracycline transporter-like protein - Homo sapiens (Human)</i></b> |                  |                                |               |               |                    |
|                                                                            | Q07706_HUMAN     | R.DAADLLSPLALLR.F              | 2             | 2.5452        | Q07706             |
| <b><i>Tetraspanin-14 - Homo sapiens (Human)</i></b>                        |                  |                                |               |               |                    |
|                                                                            | TSN14_HUMAN      | R.DDIDLQNLIDSLQK.A             | 2             | 2.7516        | Q8NG11             |
| <b><i>Toll-like receptor 2 precursor - Homo sapiens (Human)</i></b>        |                  |                                |               |               |                    |
|                                                                            | TLR2_HUMAN       | R.LFDENNDAAAILLLEPIEK.K        | 2             | 3.2337        | O60603             |
|                                                                            | TLR2_HUMAN       | R.LFDENNDAAAILLLEPIEK.K        | 2             | 3.8901        | O60603             |
|                                                                            | TLR2_HUMAN       | R.LFDENNDAAAILLLEPIEK.K        | 2             | 2.3502        | O60603             |
| <b><i>Toll-like receptor 3 precursor - Homo sapiens (Human)</i></b>        |                  |                                |               |               |                    |
|                                                                            | TLR3_HUMAN       | K.LEPELCQKLPM*LK.V             | 2             | 2.7292        | O15455             |
|                                                                            | TLR3_HUMAN       | K.LEPELCQKLPM*LK.V             | 2             | 3.0688        | O15455             |
|                                                                            | TLR3_HUMAN       | K.LEPELCQKLPM*LK.V             | 2             | 2.5595        | O15455             |
|                                                                            | TLR3_HUMAN       | K.LEPELCQKLPM*LK.V             | 2             | 2.932         | O15455             |
|                                                                            | TLR3_HUMAN       | K.LEPELCQKLPM*LK.V             | 2             | 3.8711        | O15455             |
|                                                                            | TLR3_HUMAN       | K.LEPELCQKLPM*LK.V             | 2             | 3.0185        | O15455             |

| <i>Protein</i>                                                                                  | <i>Reference</i> | <i>Peptide sequence</i>   | <i>Charge</i> | <i>XCorr*</i> | <i>Accession**</i> |
|-------------------------------------------------------------------------------------------------|------------------|---------------------------|---------------|---------------|--------------------|
| <b><i>Toll-like receptor 8 precursor - Homo sapiens (Human)</i></b>                             |                  |                           |               |               |                    |
| TLR8_HUMAN                                                                                      |                  | R.DWDPGLAIIDNLMQSIQSK.K   | 2             | 2.9945        | Q9NR97             |
| <b><i>Torsin family protein C9orf167 - Homo sapiens (Human)</i></b>                             |                  |                           |               |               |                    |
| CI167_HUMAN                                                                                     |                  | R.SAEAAAAQAEEDLR.A        | 2             | 2.5562        | Q9NXH8             |
| CI167_HUMAN                                                                                     |                  | K.TPLLVLDDVELMPR.P        | 2             | 3.0429        | Q9NXH8             |
| CI167_HUMAN                                                                                     |                  | K.TPLLVLDDVELMPR.P        | 2             | 3.253         | Q9NXH8             |
| <b><i>Translocon-associated protein subunit alpha precursor - Homo sapiens (Human)</i></b>      |                  |                           |               |               |                    |
| SSRA_HUMAN                                                                                      |                  | K.GEDFPANNIVK.F           | 2             | 2.3925        | P43307             |
| SSRA_HUMAN                                                                                      |                  | K.GEDFPANNIVK.F           | 2             | 2.3094        | P43307             |
| <b><i>Transmembrane 9 superfamily protein member 3 precursor - Homo sapiens (Human)</i></b>     |                  |                           |               |               |                    |
| TM9S3_HUMAN                                                                                     |                  | R.NLSGQPNFPC#R.V          | 2             | 2.5307        | Q9HD45             |
| TM9S3_HUMAN                                                                                     |                  | R.NLSGQPNFPC#R.V          | 2             | 2.4986        | Q9HD45             |
| <b><i>Transmembrane emp24 domain-containing protein 10 precursor - Homo sapiens (Human)</i></b> |                  |                           |               |               |                    |
| TMEDA_HUMAN                                                                                     |                  | R.IPDQLVILDMK.H           | 2             | 3.0826        | P49755             |
| TMEDA_HUMAN                                                                                     |                  | R.IPDQLVILDMK.H           | 2             | 2.845         | P49755             |
| TMEDA_HUMAN                                                                                     |                  | R.RLEDLSESIVNDFAYMK.K     | 2             | 2.8184        | P49755             |
| TMEDA_HUMAN                                                                                     |                  | R.RLEDLSESIVNDFAYMK.K     | 2             | 4.0883        | P49755             |
| TMEDA_HUMAN                                                                                     |                  | R.RLEDLSESIVNDFAYMK.K     | 2             | 3.6565        | P49755             |
| TMEDA_HUMAN                                                                                     |                  | R.RLEDLSESIVNDFAYMK.K     | 2             | 4.1025        | P49755             |
| TMEDA_HUMAN                                                                                     |                  | R.RLEDLSESIVNDFAYMK.K     | 2             | 3.4039        | P49755             |
| TMEDA_HUMAN                                                                                     |                  | R.IPDQLVILDMK.H           | 2             | 3.3469        | P49755             |
| TMEDA_HUMAN                                                                                     |                  | R.LEDLSESIVNDFAYMK.K      | 2             | 4.2376        | P49755             |
| TMEDA_HUMAN                                                                                     |                  | R.RLEDLSESIVNDFAYMK.K     | 2             | 3.2359        | P49755             |
| TMEDA_HUMAN                                                                                     |                  | K.DLLVTGAYEISDQSGGAGGLR.S | 2             | 4.1488        | P49755             |
| TMEDA_HUMAN                                                                                     |                  | R.RLEDLSESIVNDFAYMK.K     | 2             | 4.2689        | P49755             |
| <b><i>Transmembrane emp24 domain-containing protein 2 precursor - Homo sapiens (Human)</i></b>  |                  |                           |               |               |                    |
| TMED2_HUMAN                                                                                     |                  | K.HEQEYMEVR.E             | 2             | 2.8977        | Q15363             |
| TMED2_HUMAN                                                                                     |                  | K.HEQEYMEVR.E             | 2             | 2.8179        | Q15363             |
| TMED2_HUMAN                                                                                     |                  | K.HEQEYMEVR.E             | 2             | 3.3781        | Q15363             |
| TMED2_HUMAN                                                                                     |                  | K.HEQEYMEVR.E             | 2             | 3.1338        | Q15363             |
| <b><i>Transmembrane emp24 domain-containing protein 5 precursor - Homo sapiens (Human)</i></b>  |                  |                           |               |               |                    |
| TMED5_HUMAN                                                                                     |                  | K.LEDILESINSIK.S          | 2             | 3.4724        | Q9Y3A6             |
| TMED5_HUMAN                                                                                     |                  | K.LEDILESINSIK.S          | 2             | 3.167         | Q9Y3A6             |
| TMED5_HUMAN                                                                                     |                  | K.LEDILESINSIK.S          | 2             | 3.2693        | Q9Y3A6             |

| <i>Protein</i>                                                                                   | <i>Reference</i> | <i>Peptide sequence</i>           | <i>Charge</i> | <i>XCorr*</i> | <i>Accession**</i> |
|--------------------------------------------------------------------------------------------------|------------------|-----------------------------------|---------------|---------------|--------------------|
|                                                                                                  | TMED5_HUMAN      | K.LEDILESINSIK.S                  | 2             | 3.3177        | Q9Y3A6             |
|                                                                                                  | TMED5_HUMAN      | K.LEDILESINSIK.S                  | 2             | 2.9808        | Q9Y3A6             |
| <b><i>Transmembrane emp24 domain-containing protein 9 precursor - Homo sapiens (Human)</i></b>   |                  |                                   |               |               |                    |
|                                                                                                  | TMED9_HUMAN      | R.QLVEQVEQIQK.E                   | 2             | 3.0989        | Q9BVK6             |
| <b><i>Transmembrane protease, serine 13 - Homo sapiens (Human)</i></b>                           |                  |                                   |               |               |                    |
|                                                                                                  | TMPD_HUMAN       | R.AMTGRIVGGALASDSK.W              | 2             | 2.4976        | Q9BYE2             |
| <b><i>Transmembrane protein 49 - Homo sapiens (Human)</i></b>                                    |                  |                                   |               |               |                    |
|                                                                                                  | TMM49_HUMAN      | R.LSGAEPDDEEYQFEEMLEHAESAQDFASR.A | 3             | 4.1371        | Q96GC9             |
| <b><i>Trifunctional enzyme subunit alpha, mitochondrial precursor - Homo sapiens (Human)</i></b> |                  |                                   |               |               |                    |
|                                                                                                  | ECHA_HUMAN       | K.TGIEQGS DAGYLC#ESQK.F           | 2             | 3.8824        | P40939             |
|                                                                                                  | ECHA_HUMAN       | K.DLNSDMDSILASLK.L                | 2             | 4.3652        | P40939             |
|                                                                                                  | ECHA_HUMAN       | R.DSIFSNLTGQLDYQGFEK.A            | 2             | 3.529         | P40939             |
|                                                                                                  | ECHA_HUMAN       | R.FGGNPPELLTQMVSK.G               | 2             | 3.2824        | P40939             |
|                                                                                                  | ECHA_HUMAN       | K.TLQEV TQLSQAQR.I                | 2             | 3.4555        | P40939             |
|                                                                                                  | ECHA_HUMAN       | K.TLQEV TQLSQAQR.I                | 2             | 3.8649        | P40939             |
|                                                                                                  | ECHA_HUMAN       | K.TGIEQGS DAGYLC#ESQK.F           | 2             | 4.02          | P40939             |
|                                                                                                  | ECHA_HUMAN       | K.TGIEQGS DAGYLC#ESQK.F           | 2             | 3.0244        | P40939             |
|                                                                                                  | ECHA_HUMAN       | K.TGIEQGS DAGYLC#ESQK.F           | 2             | 3.8108        | P40939             |
|                                                                                                  | ECHA_HUMAN       | K.DLNSDMDSILASLK.L                | 2             | 4.1329        | P40939             |
| <b><i>Tubulin alpha-1A chain - Homo sapiens (Human)</i></b>                                      |                  |                                   |               |               |                    |
|                                                                                                  | TBA1A_HUMAN      | R.FDGALNVDL TEFQTNLVPYPR.I        | 2             | 4.0107        | Q71U36             |
|                                                                                                  | TBA1A_HUMAN      | R.FDGALNVDL TEFQTNLVPYPR.I        | 2             | 4.0491        | Q71U36             |
|                                                                                                  | TBA1A_HUMAN      | K.EIIDLV LDR.I                    | 2             | 2.8041        | Q71U36             |
|                                                                                                  | TBA1A_HUMAN      | K.TIGGG DDFSNTFFSETGAGK.H         | 2             | 3.7213        | Q71U36             |
|                                                                                                  | TBA1A_HUMAN      | K.VGINYQPPTV VPGDLAK.V            | 2             | 2.6558        | Q71U36             |
|                                                                                                  | TBA1A_HUMAN      | R.NLDIERPT YTNLNR.L               | 2             | 2.7711        | Q71U36             |
|                                                                                                  | TBA1A_HUMAN      | K.DVNAAIATIK.T                    | 2             | 2.6526        | Q71U36             |
|                                                                                                  | TBA1A_HUMAN      | R.FDGALNVDL TEFQTNLVPYPR.I        | 2             | 3.5541        | Q71U36             |
|                                                                                                  | TBA1A_HUMAN      | R.NLDIERPT YTNLNR.L               | 2             | 2.8306        | Q71U36             |
|                                                                                                  | TBA1A_HUMAN      | K.TIGGG DDFSNTFFSETGAGK.H         | 2             | 4.2181        | Q71U36             |
|                                                                                                  | TBA1A_HUMAN      | K.TIGGG DDFSNTFFSETGAGK.H         | 2             | 4.2982        | Q71U36             |
| <b><i>Tubulin beta-1 chain - Homo sapiens (Human)</i></b>                                        |                  |                                   |               |               |                    |
|                                                                                                  | TBB1_HUMAN       | R.FPGQLNADLR.K                    | 2             | 2.3437        | Q9H4B7             |
|                                                                                                  | TBB1_HUMAN       | R.FPGQLNADLR.K                    | 2             | 2.4966        | Q9H4B7             |

| <i>Protein</i>                                                                                            | <i>Reference</i> | <i>Peptide sequence</i>  | <i>Charge</i> | <i>XCorr*</i> | <i>Accession**</i> |
|-----------------------------------------------------------------------------------------------------------|------------------|--------------------------|---------------|---------------|--------------------|
| TBB1_HUMAN                                                                                                |                  | R.FPGQLNADLR.K           | 2             | 2.6354        | Q9H4B7             |
| TBB1_HUMAN                                                                                                |                  | K.EVDQQLLSVQTR.N         | 2             | 2.4552        | Q9H4B7             |
| TBB1_HUMAN                                                                                                |                  | R.FPGQLNADLR.K           | 2             | 2.4121        | Q9H4B7             |
| <b><i>Tubulin beta-2A chain - Homo sapiens (Human)</i></b>                                                |                  |                          |               |               |                    |
| TBB2A_HUMAN                                                                                               |                  | K.EVDEQM*LNQNK.N         | 2             | 3.5741        | Q13885             |
| TBB2A_HUMAN                                                                                               |                  | K.EVDEQMLNVQNK.N         | 2             | 3.6314        | Q13885             |
| TBB2A_HUMAN                                                                                               |                  | K.EVDEQM*LNQNK.N         | 2             | 3.5123        | Q13885             |
| TBB2A_HUMAN                                                                                               |                  | K.EVDEQMLNVQNK.N         | 2             | 4.2298        | Q13885             |
| TBB2A_HUMAN                                                                                               |                  | K.EVDEQMLNVQNK.N         | 2             | 3.3041        | Q13885             |
| TBB2A_HUMAN                                                                                               |                  | K.GHYTEGAELVDSVLDVVR.K   | 2             | 2.8987        | Q13885             |
| TBB2A_HUMAN                                                                                               |                  | K.GHYTEGAELVDSVLDVVR.K   | 3             | 4.1245        | Q13885             |
| TBB2A_HUMAN                                                                                               |                  | K.EVDEQMLNVQNK.N         | 2             | 4.1738        | Q13885             |
| TBB2A_HUMAN                                                                                               |                  | K.EVDEQM*LNQNK.N         | 2             | 3.6404        | Q13885             |
| TBB2A_HUMAN                                                                                               |                  | K.EVDEQMLNVQNK.N         | 2             | 3.3396        | Q13885             |
| TBB2A_HUMAN                                                                                               |                  | K.EVDEQM*LNQNK.N         | 2             | 3.4787        | Q13885             |
| <b><i>Tudor domain-containing protein 3 - Homo sapiens (Human)</i></b>                                    |                  |                          |               |               |                    |
| TDRD3_HUMAN                                                                                               |                  | K.TLQVTM*PVKPTNDNDEFEK.Q | 2             | 2.4248        | Q9H7E2             |
| <b><i>Tumor necrosis factor, alpha-induced protein 2 - Homo sapiens (Human)</i></b>                       |                  |                          |               |               |                    |
| TNAP2_HUMAN                                                                                               |                  | R.ELAAAAAAGGVSEELVR.R    | 2             | 2.7882        | Q03169             |
| TNAP2_HUMAN                                                                                               |                  | R.ELAAAAAAGGVSEELVR.R    | 2             | 2.6805        | Q03169             |
| <b><i>Tyrosine-protein phosphatase non-receptor type 12 - Homo sapiens (Human)</i></b>                    |                  |                          |               |               |                    |
| PTN12_HUMAN                                                                                               |                  | K.IPEEFNVFNLIQEMR.T      | 2             | 3.7411        | Q05209             |
| <b><i>Tyrosine-protein phosphatase non-receptor type 6 - Homo sapiens (Human)</i></b>                     |                  |                          |               |               |                    |
| PTN6_HUMAN                                                                                                |                  | R.ESLSQPGDFVLSVSDQPK.A   | 2             | 2.7832        | P29350             |
| PTN6_HUMAN                                                                                                |                  | K.GLDC#DIDIQK.T          | 2             | 2.9848        | P29350             |
| PTN6_HUMAN                                                                                                |                  | R.ESLSQPGDFVLSVSDQPK.A   | 2             | 2.8129        | P29350             |
| <b><i>Tyrosine-protein phosphatase non-receptor type substrate 1 precursor - Homo sapiens (Human)</i></b> |                  |                          |               |               |                    |
| SHPS1_HUMAN                                                                                               |                  | R.EITQDTNDITYADLNLPK.G   | 2             | 3.1384        | P78324             |
| <b><i>Ubiquinol-cytochrome-c reductase complex core protein 2, mitochondrial precursor - Homo sa</i></b>  |                  |                          |               |               |                    |
| UQCR2_HUMAN                                                                                               |                  | K.TIAQGNLSNTDVQAAK.N     | 2             | 2.4214        | P22695             |
| UQCR2_HUMAN                                                                                               |                  | K.TIAQGNLSNTDVQAAK.N     | 2             | 3.8427        | P22695             |
| UQCR2_HUMAN                                                                                               |                  | K.TIAQGNLSNTDVQAAK.N     | 2             | 3.4692        | P22695             |
| UQCR2_HUMAN                                                                                               |                  | K.TIAQGNLSNTDVQAAK.N     | 2             | 3.8101        | P22695             |
| UQCR2_HUMAN                                                                                               |                  | K.TIAQGNLSNTDVQAAK.N     | 2             | 3.7754        | P22695             |

| <i>Protein</i>                                                                  | <i>Reference</i> | <i>Peptide sequence</i>            | <i>Charge</i> | <i>XCorr*</i> | <i>Accession**</i> |
|---------------------------------------------------------------------------------|------------------|------------------------------------|---------------|---------------|--------------------|
| <b><i>Ubiquitin - Homo sapiens (Human)</i></b>                                  |                  |                                    |               |               |                    |
| UBIQ_HUMAN                                                                      |                  | K.TITLEVEPSDTIENVK.A               | 2             | 2.9813        | P62988             |
| UBIQ_HUMAN                                                                      |                  | K.TITLEVEPSDTIENVK.A               | 2             | 4.0933        | P62988             |
| UBIQ_HUMAN                                                                      |                  | K.TITLEVEPSDTIENVK.A               | 2             | 4.05          | P62988             |
| UBIQ_HUMAN                                                                      |                  | K.TITLEVEPSDTIENVK.A               | 2             | 4.6406        | P62988             |
| UBIQ_HUMAN                                                                      |                  | K.TITLEVEPSDTIENVK.A               | 2             | 3.4263        | P62988             |
| UBIQ_HUMAN                                                                      |                  | K.ESTLHLVLR.L                      | 2             | 2.3546        | P62988             |
| UBIQ_HUMAN                                                                      |                  | K.TITLEVEPSDTIENVK.A               | 2             | 4.0995        | P62988             |
| UBIQ_HUMAN                                                                      |                  | K.TITLEVEPSDTIENVK.A               | 2             | 3.7302        | P62988             |
| UBIQ_HUMAN                                                                      |                  | K.ESTLHLVLR.L                      | 2             | 2.3397        | P62988             |
| <b><i>Unc-112-related protein 2 - Homo sapiens (Human)</i></b>                  |                  |                                    |               |               |                    |
| URP2_HUMAN                                                                      |                  | R.ARGEELDEDLFLQLTGGEAF.-           | 2             | 2.6782        | Q86UX7             |
| URP2_HUMAN                                                                      |                  | K.GC#EVVPDVNVSGQK.F                | 2             | 2.5058        | Q86UX7             |
| URP2_HUMAN                                                                      |                  | R.TM*ADSSYTSEVQAILAFLSLQR.T        | 2             | 2.7321        | Q86UX7             |
| URP2_HUMAN                                                                      |                  | K.LEGSAPTDVLDLSTTIPELK.D           | 2             | 3.2959        | Q86UX7             |
| URP2_HUMAN                                                                      |                  | K.EKEPEEELYDLSK.V                  | 2             | 2.3284        | Q86UX7             |
| URP2_HUMAN                                                                      |                  | R.TMADSSYTSEVQAILAFLSLQR.T         | 2             | 2.8786        | Q86UX7             |
| URP2_HUMAN                                                                      |                  | R.VFVGEEDPEAESVTLR.V               | 2             | 3.4512        | Q86UX7             |
| URP2_HUMAN                                                                      |                  | K.LEGSAPTDVLDLSTTIPELK.D           | 2             | 3.4989        | Q86UX7             |
| URP2_HUMAN                                                                      |                  | R.GEELDEDLFLQLTGGEAF.-             | 2             | 3.0257        | Q86UX7             |
| URP2_HUMAN                                                                      |                  | K.GC#EVVPDVNVSGQK.F                | 2             | 2.4427        | Q86UX7             |
| <b><i>Unc-13 homolog D - Homo sapiens (Human)</i></b>                           |                  |                                    |               |               |                    |
| UN13D_HUMAN                                                                     |                  | R.VGAVLEQQQLQNTLHAQLQSALAGLGHEIR.T | 3             | 5.0997        | Q70J99             |
| UN13D_HUMAN                                                                     |                  | R.TLAEQLEVGIAK.H                   | 2             | 2.376         | Q70J99             |
| UN13D_HUMAN                                                                     |                  | R.YLQEAHFHVEPEEHQQTLR.V            | 3             | 4.4843        | Q70J99             |
| <b><i>UNC93 homolog B1 - Homo sapiens (Human)</i></b>                           |                  |                                    |               |               |                    |
| UN93B_HUMAN                                                                     |                  | R.RPC#PYEQAQGGDGPEEQ.-             | 2             | 2.9289        | Q9H1C4             |
| UN93B_HUMAN                                                                     |                  | R.RPC#PYEQAQGGDGPEEQ.-             | 2             | 3.4607        | Q9H1C4             |
| UN93B_HUMAN                                                                     |                  | R.RPC#PYEQAQGGDGPEEQ.-             | 2             | 3.701         | Q9H1C4             |
| <b><i>Uncharacterized protein KIAA0152 precursor - Homo sapiens (Human)</i></b> |                  |                                    |               |               |                    |
| K0152_HUMAN                                                                     |                  | K.KEEEEEEEEYDEGSNLKK.Q             | 3             | 5.4968        | Q14165             |
| K0152_HUMAN                                                                     |                  | K.KEEEEEEEEYDEGSNLKK.Q             | 3             | 6.9483        | Q14165             |
| K0152_HUMAN                                                                     |                  | R.SNPEDQILYQTER.Y                  | 2             | 3.0228        | Q14165             |
| <b><i>Uncharacterized protein KIAA0562 - Homo sapiens (Human)</i></b>           |                  |                                    |               |               |                    |



| <i>Protein</i>                                                                                        | <i>Reference</i> | <i>Peptide sequence</i>          | <i>Charge</i> | <i>XCorr*</i> | <i>Accession**</i> |
|-------------------------------------------------------------------------------------------------------|------------------|----------------------------------|---------------|---------------|--------------------|
|                                                                                                       | K0562_HUMAN      | K.PM*PSLPQLEER.G                 | 2             | 2.3743        | O60308             |
| <b><i>Uncharacterized protein KIAA0776 - Homo sapiens (Human)</i></b>                                 |                  |                                  |               |               |                    |
|                                                                                                       | K0776_HUMAN      | K.HIQDAPEEFISELAELYLIKPLNK.T     | 3             | 4.1565        | O94874             |
| <b><i>Uncharacterized protein KIAA1754 precursor - Homo sapiens (Human)</i></b>                       |                  |                                  |               |               |                    |
|                                                                                                       | K1754_HUMAN      | R.EFLEGFVDDLLEALR.S              | 2             | 4.7045        | Q8IWB1             |
| <b><i>UPF0318 protein FAM120A - Homo sapiens (Human)</i></b>                                          |                  |                                  |               |               |                    |
|                                                                                                       | F120A_HUMAN      | K.TPLIDLCDGQADQAAK.V             | 2             | 2.447         | Q9NZB2             |
| <b><i>UPF0404 protein C11orf59 - Homo sapiens (Human)</i></b>                                         |                  |                                  |               |               |                    |
|                                                                                                       | CK059_HUMAN      | R.TDEQALLSSILAK.T                | 2             | 3.5299        | Q6IAA8             |
|                                                                                                       | CK059_HUMAN      | R.TDEQALLSSILAK.T                | 2             | 3.7255        | Q6IAA8             |
|                                                                                                       | CK059_HUMAN      | R.TDEQALLSSILAK.T                | 2             | 3.0852        | Q6IAA8             |
| <b><i>Uveal autoantigen with coiled-coil domains and ankyrin repeats - Homo sapiens (Human)</i></b>   |                  |                                  |               |               |                    |
|                                                                                                       | UACA_HUMAN       | K.KLEMEKLLLENDLSK.D              | 2             | 2.5751        | Q9BZF9             |
|                                                                                                       | UACA_HUMAN       | K.KLEMEKLLLENDLSK.D              | 2             | 2.7843        | Q9BZF9             |
| <b><i>Vacuolar proton translocating ATPase 116 kDa subunit a isoform 3 - Homo sapiens (Human)</i></b> |                  |                                  |               |               |                    |
|                                                                                                       | VPP3_HUMAN       | R.LGALQQLQQSQELQEVLGETER.F       | 2             | 4.376         | Q13488             |
|                                                                                                       | VPP3_HUMAN       | R.LGALQQLQQSQELQEVLGETER.F       | 2             | 3.1487        | Q13488             |
|                                                                                                       | VPP3_HUMAN       | R.LGALQQLQQSQELQEVLGETER.F       | 2             | 4.1006        | Q13488             |
| <b><i>Vam6/Vps39-like protein - Homo sapiens (Human)</i></b>                                          |                  |                                  |               |               |                    |
|                                                                                                       | VPS39_HUMAN      | K.TPVPAGEEEGELGEYR.Q             | 2             | 3.0168        | Q96JC1             |
| <b><i>Vesicle transport protein GOT1B - Homo sapiens (Human)</i></b>                                  |                  |                                  |               |               |                    |
|                                                                                                       | GOT1B_HUMAN      | R.VPVLGSLLNLPGIR.S               | 2             | 3.9683        | Q9Y3E0             |
|                                                                                                       | GOT1B_HUMAN      | R.VPVLGSLLNLPGIR.S               | 2             | 3.0228        | Q9Y3E0             |
|                                                                                                       | GOT1B_HUMAN      | R.VPVLGSLLNLPGIR.S               | 2             | 3.9912        | Q9Y3E0             |
| <b><i>Vesicle transport through interaction with t-SNAREs homolog 1A - Homo sapiens (Human)</i></b>   |                  |                                  |               |               |                    |
|                                                                                                       | VT11A_HUMAN      | R.RLEAGYQIAVETEIQIGQEMLENLSHDR.E | 3             | 5.2389        | Q96AJ9             |
| <b><i>Vesicle-associated membrane protein 2 - Homo sapiens (Human)</i></b>                            |                  |                                  |               |               |                    |
|                                                                                                       | VAMP2_HUMAN      | R.ADALQAGASQFETSAAK.L            | 2             | 4.0284        | P63027             |
| <b><i>Vesicle-associated membrane protein 8 - Homo sapiens (Human)</i></b>                            |                  |                                  |               |               |                    |
|                                                                                                       | VAMP8_HUMAN      | R.NKTEDLEATSEHFK.T               | 3             | 4.0925        | Q9BV40             |
|                                                                                                       | VAMP8_HUMAN      | R.NKTEDLEATSEHFK.T               | 3             | 4.4381        | Q9BV40             |
|                                                                                                       | VAMP8_HUMAN      | R.NKTEDLEATSEHFK.T               | 3             | 3.905         | Q9BV40             |
|                                                                                                       | VAMP8_HUMAN      | R.NKTEDLEATSEHFK.T               | 3             | 4.0468        | Q9BV40             |

| <i>Protein</i>                                                                           | <i>Reference</i> | <i>Peptide sequence</i>                 | <i>Charge</i> | <i>XCorr*</i> | <i>Accession**</i> |
|------------------------------------------------------------------------------------------|------------------|-----------------------------------------|---------------|---------------|--------------------|
| <b><i>Vesicle-trafficking protein SEC22b - Homo sapiens (Human)</i></b>                  |                  |                                         |               |               |                    |
| SC22B_HUMAN                                                                              |                  | R.NLGSINTELQDVQR.I                      | 2             | 3.5455        | O75396             |
| SC22B_HUMAN                                                                              |                  | R.NLGSINTELQDVQR.I                      | 2             | 3.7895        | O75396             |
| SC22B_HUMAN                                                                              |                  | R.NLGSINTELQDVQR.I                      | 2             | 2.8228        | O75396             |
| SC22B_HUMAN                                                                              |                  | R.NLGSINTELQDVQR.I                      | 2             | 4.3325        | O75396             |
| SC22B_HUMAN                                                                              |                  | R.VADGLPLAASMQEDEQSGR.D                 | 2             | 2.9689        | O75396             |
| <b><i>Vesicular integral-membrane protein VIP36 precursor - Homo sapiens (Human)</i></b> |                  |                                         |               |               |                    |
| LMAN2_HUMAN                                                                              |                  | R.DHDTFLAVR.Y                           | 2             | 2.3498        | Q12907             |
| LMAN2_HUMAN                                                                              |                  | K.DNVDDPTGNFR.S                         | 2             | 2.8489        | Q12907             |
| LMAN2_HUMAN                                                                              |                  | K.DNVDDPTGNFR.S                         | 2             | 2.7958        | Q12907             |
| LMAN2_HUMAN                                                                              |                  | R.DHDTFLAVR.Y                           | 2             | 2.6091        | Q12907             |
| LMAN2_HUMAN                                                                              |                  | K.DNVDDPTGNFR.S                         | 2             | 2.5609        | Q12907             |
| <b><i>Vimentin - Homo sapiens (Human)</i></b>                                            |                  |                                         |               |               |                    |
| VIME_HUMAN                                                                               |                  | R.EMEENFAVEAANYQDTIGR.L                 | 2             | 4.3925        | P08670             |
| VIME_HUMAN                                                                               |                  | R.EMEENFAVEAANYQDTIGR.L                 | 2             | 4.8574        | P08670             |
| VIME_HUMAN                                                                               |                  | K.KLHEEEIQELQAQIQEQHVQIDVDVSKPDLTAALR.D | 4             | 5.1316        | P08670             |
| VIME_HUMAN                                                                               |                  | R.QVQSLTC#EVDALK.G                      | 2             | 2.5869        | P08670             |
| VIME_HUMAN                                                                               |                  | R.EEAENTLQSFR.Q                         | 2             | 2.3228        | P08670             |
| VIME_HUMAN                                                                               |                  | R.LLQDSVDFSLADAINTEFK.N                 | 2             | 2.815         | P08670             |
| VIME_HUMAN                                                                               |                  | K.VESLQEEIAFLK.K                        | 2             | 3.1249        | P08670             |
| VIME_HUMAN                                                                               |                  | K.VESLQEEIAFLK.K                        | 2             | 3.2063        | P08670             |
| VIME_HUMAN                                                                               |                  | K.LHEEEIQELQAQIQEQHVQIDVDVSKPDLTAALR.D  | 4             | 4.8197        | P08670             |
| VIME_HUMAN                                                                               |                  | R.QVQSLTC#EVDALK.G                      | 2             | 2.3414        | P08670             |
| VIME_HUMAN                                                                               |                  | K.VESLQEEIAFLK.K                        | 2             | 2.5294        | P08670             |
| VIME_HUMAN                                                                               |                  | R.EEAENTLQSFR.Q                         | 2             | 2.676         | P08670             |
| VIME_HUMAN                                                                               |                  | R.QVQSLTC#EVDALK.G                      | 2             | 2.4574        | P08670             |
| VIME_HUMAN                                                                               |                  | K.VESLQEEIAFLK.K                        | 2             | 2.8092        | P08670             |
| VIME_HUMAN                                                                               |                  | R.LLQDSVDFSLADAINTEFK.N                 | 2             | 3.6889        | P08670             |
| VIME_HUMAN                                                                               |                  | R.EEAENTLQSFR.Q                         | 2             | 2.5909        | P08670             |
| VIME_HUMAN                                                                               |                  | K.VESLQEEIAFLK.K                        | 2             | 3.4336        | P08670             |
| VIME_HUMAN                                                                               |                  | R.EEAENTLQSFR.Q                         | 2             | 2.4403        | P08670             |
| <b><i>Voltage-dependent anion channel 2 - Homo sapiens (Human)</i></b>                   |                  |                                         |               |               |                    |
| Q5JSD1_HUMA                                                                              |                  | R.PMC#IPPSYADLGK.A                      | 2             | 2.4815        | Q5JSD1             |
| Q5JSD1_HUMA                                                                              |                  | R.PMC#IPPSYADLGK.A                      | 2             | 2.9495        | Q5JSD1             |
| <b><i>Voltage-dependent anion-selective channel protein 1 - Homo sapiens (Human)</i></b> |                  |                                         |               |               |                    |

| <i>Protein</i> | <i>Reference</i> | <i>Peptide sequence</i>     | <i>Charge</i> | <i>XCorr*</i> | <i>Accession**</i> |
|----------------|------------------|-----------------------------|---------------|---------------|--------------------|
| VDAC1_HUMAN    |                  | K.TDEFQLHTNVNDGTEFGGSIYQK.V | 3             | 5.4091        | P21796             |
| VDAC1_HUMAN    |                  | K.WNTDNTLGTEITVEDQLAR.G     | 2             | 2.5859        | P21796             |
| VDAC1_HUMAN    |                  | K.WNTDNTLGTEITVEDQLAR.G     | 2             | 2.5343        | P21796             |
| VDAC1_HUMAN    |                  | K.WNTDNTLGTEITVEDQLAR.G     | 2             | 3.6433        | P21796             |
| VDAC1_HUMAN    |                  | K.VNNSLIGLGYTQTLKPGIK.L     | 2             | 3.468         | P21796             |
| VDAC1_HUMAN    |                  | K.TDEFQLHTNVNDGTEFGGSIYQK.V | 2             | 4.2172        | P21796             |
| VDAC1_HUMAN    |                  | K.SENGLEFTSSGSANTETTK.V     | 2             | 2.5277        | P21796             |
| VDAC1_HUMAN    |                  | K.SENGLEFTSSGSANTETTK.V     | 2             | 3.4201        | P21796             |
| VDAC1_HUMAN    |                  | K.WNTDNTLGTEITVEDQLAR.G     | 2             | 3.8125        | P21796             |
| VDAC1_HUMAN    |                  | K.VNNSLIGLGYTQTLKPGIK.L     | 2             | 3.1616        | P21796             |
| VDAC1_HUMAN    |                  | K.TDEFQLHTNVNDGTEFGGSIYQK.V | 2             | 4.6335        | P21796             |
| VDAC1_HUMAN    |                  | K.TDEFQLHTNVNDGTEFGGSIYQK.V | 2             | 4.8513        | P21796             |
| VDAC1_HUMAN    |                  | K.SENGLEFTSSGSANTETTK.V     | 2             | 3.4499        | P21796             |
| VDAC1_HUMAN    |                  | K.TDEFQLHTNVNDGTEFGGSIYQK.V | 2             | 4.54          | P21796             |
| VDAC1_HUMAN    |                  | K.VNNSLIGLGYTQTLKPGIK.L     | 2             | 2.7579        | P21796             |
| VDAC1_HUMAN    |                  | K.SENGLEFTSSGSANTETTK.V     | 2             | 4.3453        | P21796             |
| VDAC1_HUMAN    |                  | K.SENGLEFTSSGSANTETTK.V     | 2             | 3.4818        | P21796             |

***Voltage-dependent anion-selective channel protein 2 - Homo sapiens (Human)***

|             |  |                             |   |        |        |
|-------------|--|-----------------------------|---|--------|--------|
| VDAC2_HUMAN |  | K.SC#SGVEFSTSGSSNTDTGK.V    | 2 | 4.929  | P45880 |
| VDAC2_HUMAN |  | K.WNTDNTLGTEIAIEDQIC#QGLK.L | 2 | 3.0062 | P45880 |
| VDAC2_HUMAN |  | K.VNNSLIGVGYTQTLRPGVK.L     | 2 | 3.0908 | P45880 |
| VDAC2_HUMAN |  | R.TGDFQLHTNVNDGTEFGGSIYQK.V | 2 | 5.2069 | P45880 |
| VDAC2_HUMAN |  | K.SC#SGVEFSTSGSSNTDTGK.V    | 2 | 4.08   | P45880 |
| VDAC2_HUMAN |  | K.WNTDNTLGTEIAIEDQIC#QGLK.L | 2 | 2.9082 | P45880 |
| VDAC2_HUMAN |  | R.TGDFQLHTNVNDGTEFGGSIYQK.V | 2 | 5.0213 | P45880 |
| VDAC2_HUMAN |  | K.SC#SGVEFSTSGSSNTDTGK.V    | 2 | 4.8065 | P45880 |
| VDAC2_HUMAN |  | K.WNTDNTLGTEIAIEDQIC#QGLK.L | 2 | 3.7846 | P45880 |
| VDAC2_HUMAN |  | K.WNTDNTLGTEIAIEDQIC#QGLK.L | 2 | 4.0646 | P45880 |
| VDAC2_HUMAN |  | R.TGDFQLHTNVNDGTEFGGSIYQK.V | 3 | 5.01   | P45880 |
| VDAC2_HUMAN |  | K.VNNSLIGVGYTQTLRPGVK.L     | 3 | 4.3737 | P45880 |
| VDAC2_HUMAN |  | K.SC#SGVEFSTSGSSNTDTGK.V    | 2 | 4.1038 | P45880 |

***Voltage-dependent anion-selective channel protein 3 - Homo sapiens (Human)***

|             |  |                             |   |        |        |
|-------------|--|-----------------------------|---|--------|--------|
| VDAC3_HUMAN |  | K.AADFQLHTHVNDGTEFGGSIYQK.V | 3 | 6.1498 | Q9Y277 |
| VDAC3_HUMAN |  | K.WNTDNTLGTEISWENK.L        | 2 | 2.5899 | Q9Y277 |
| VDAC3_HUMAN |  | K.AADFQLHTHVNDGTEFGGSIYQK.V | 3 | 5.3321 | Q9Y277 |

| <i>Protein</i>                                                                                      | <i>Reference</i> | <i>Peptide sequence</i>     | <i>Charge</i> | <i>XCorr*</i> | <i>Accession**</i> |
|-----------------------------------------------------------------------------------------------------|------------------|-----------------------------|---------------|---------------|--------------------|
| VDAC3_HUMAN                                                                                         |                  | K.WNTDNTLGTEISWENK.L        | 2             | 3.4735        | Q9Y277             |
| VDAC3_HUMAN                                                                                         |                  | K.AADFQLHTHVNDGTEFGGSIYQK.V | 3             | 6.1257        | Q9Y277             |
| VDAC3_HUMAN                                                                                         |                  | K.AADFQLHTHVNDGTEFGGSIYQK.V | 3             | 5.8775        | Q9Y277             |
| VDAC3_HUMAN                                                                                         |                  | K.AADFQLHTHVNDGTEFGGSIYQK.V | 3             | 4.0222        | Q9Y277             |
| <b><i>Zinc finger CCHC domain-containing protein 11 - Homo sapiens (Human)</i></b>                  |                  |                             |               |               |                    |
| ZCH11_HUMAN                                                                                         |                  | R.M*DDFQLKGIVEEKFK.V        | 2             | 2.5007        | Q5TAX3             |
| <b><i>Zinc finger protein 12 - Homo sapiens (Human)</i></b>                                         |                  |                             |               |               |                    |
| ZNF12_HUMAN                                                                                         |                  | K.AFQKDTVFNHM*EEK.P         | 2             | 2.3129        | P17014             |
| <b><i>Zinc finger protein 44 - Homo sapiens (Human)</i></b>                                         |                  |                             |               |               |                    |
| ZNF44_HUMAN                                                                                         |                  | R.IHEGHTLEK.P               | 2             | 2.3213        | P15621             |
| <b><i>Zinc finger protein 667 - Homo sapiens (Human)</i></b>                                        |                  |                             |               |               |                    |
| ZN667_HUMAN                                                                                         |                  | K.AFNQM*SSLLHKK.I           | 2             | 2.3824        | Q5HYK9             |
| <b><i>Zinc-binding alcohol dehydrogenase domain-containing protein 1 - Homo sapiens (Human)</i></b> |                  |                             |               |               |                    |
| ZADH1_HUMAN                                                                                         |                  | K.FEPGILQLSQWFK.E           | 2             | 2.3727        | Q8N8N7             |
